# Supplementary material
Source: publisher figshare collection journal article supplement (https://acs.figshare.com/ndownloader/files/9394186)
Supplement: Supplementary file 1 [file 9394186]

## Supporting Information

### Catalytic Asymmetric [4+2]-Cycloaddition of Dienes with Aldehydes

Luping Liu, Hyejin Kim, Youwei Xie, Christophe Farès, Philip S. J. Kaib, Richard Goddard, and Benjamin List\*

Max-Planck-Institut für Kohlenforschung, Kaiser Wilhelm-Platz 1, 45470 Mülheim an der Ruhr, Germany

\*Correspondence to: [list@kofo.mpg.de](mailto:list@kofo.mpg.de)

|                                                                               |      |
|-------------------------------------------------------------------------------|------|
| General Information.....                                                      | S2   |
| Synthesis and Characterization of Chiral Imidodiphosphorimidates (IDPis)..... | S3   |
| Optimization of Reaction Conditions.....                                      | S15  |
| Substrate Synthesis and Characterization.....                                 | S27  |
| General Procedure for the Asymmetric [4+2]-Cycloaddition.....                 | S29  |
| Characterization of Cycloadducts.....                                         | S29  |
| Gram Scale Reaction and Derivatization.....                                   | S52  |
| Kinetic Isotope Effect (KIE) Studies.....                                     | S55  |
| Single-Crystal X-ray Diffraction Analysis.....                                | S59  |
| Copies of NMR Spectra.....                                                    | S84  |
| HPLC and GC Traces.....                                                       | S155 |
| References.....                                                               | S189 |

## General information

Unless otherwise stated, all reagents were purchased from commercial suppliers and used without further purification. Aldehydes were distilled and stored under argon prior to use. All solvents used in the reactions were distilled from appropriate drying agents prior to use. Reactions were monitored by thin layer chromatography (TLC) on silica gel pre-coated plastic sheets (0.2 mm, Macherey-Nagel) or glass plates (SIL G-25 UV<sub>254</sub>, 0.25 mm, (Macherey-Nagel). Visualization was accomplished by irradiation with UV light at 254 nm and/or phosphomolybdic acid (PMA) stain. PMA stain: PMA (10 g) in EtOH (100 mL). Column chromatography was performed on Merck silica gel (60, particle size 0.040–0.063 mm). NMR spectra were recorded on Bruker AV-500, Bruker AV-400 or Bruker AV-300 spectrometer in deuterated solvents. Proton chemical shifts are reported in ppm ( $\delta$ ) relative to tetramethylsilane (TMS) with the solvent resonance employed as the internal standard (CDCl<sub>3</sub>  $\delta$  7.26 ppm; CD<sub>2</sub>Cl<sub>2</sub>  $\delta$  5.32 ppm). Data are reported as follows: chemical shift, multiplicity (s = singlet, d = doublet, t = triplet, q = quartet, p = pentet, sext = sextet, h = heptet, m = multiplet, br = broad), coupling constants (Hz) and integration. <sup>13</sup>C chemical shifts are reported in ppm from tetramethylsilane (TMS) with the solvent resonance as the internal standard (CDCl<sub>3</sub>  $\delta$  77.16 ppm; CD<sub>2</sub>Cl<sub>2</sub>  $\delta$  53.84 ppm). <sup>19</sup>F, <sup>31</sup>P NMR spectra were referenced in ppm from CCl<sub>3</sub>F and H<sub>3</sub>PO<sub>4</sub>, respectively. High resolution mass spectra were determined on a Bruker APEX III FTMS (7 T magnet). All reported yields, unless otherwise specified, refer to spectroscopically and chromatographically pure compounds. Optical rotations were determined with Autopol IV polarimeter (Rudolph Research Analytical) at 589 nm and 20 or 25 °C. Data are reported as follows:  $[\alpha]_{\lambda}^{\text{temp}}$ , concentration (*c*; g/100 mL), and solvents. Enantiomeric ratios (e.r.) were determined by GC or HPLC analysis employing a chiral stationary phase column specified in the individual experiment, by comparing the samples with the appropriate racemic mixtures. Diastereomeric ratios (d.r.) were determined by <sup>1</sup>H NMR spectra of the crude reaction mixtures, GC or HPLC analysis employing a chiral stationary phase. The crystals were measured and analyzed in the department of Chemical Crystallography and Electron Microscopy at Max-Planck-Institut für Kohlenforschung. Data were face-indexed absorption corrected and scaled using the program SADABS (Bruker AXS, 2014). The structure was solved and refined using the programs SHELXS and SHELXL, both programs from G. M. Sheldrick (Göttingen, 2014).

## Synthesis and Characterization of Chiral Imidodiphosphorimidates (IDPis)

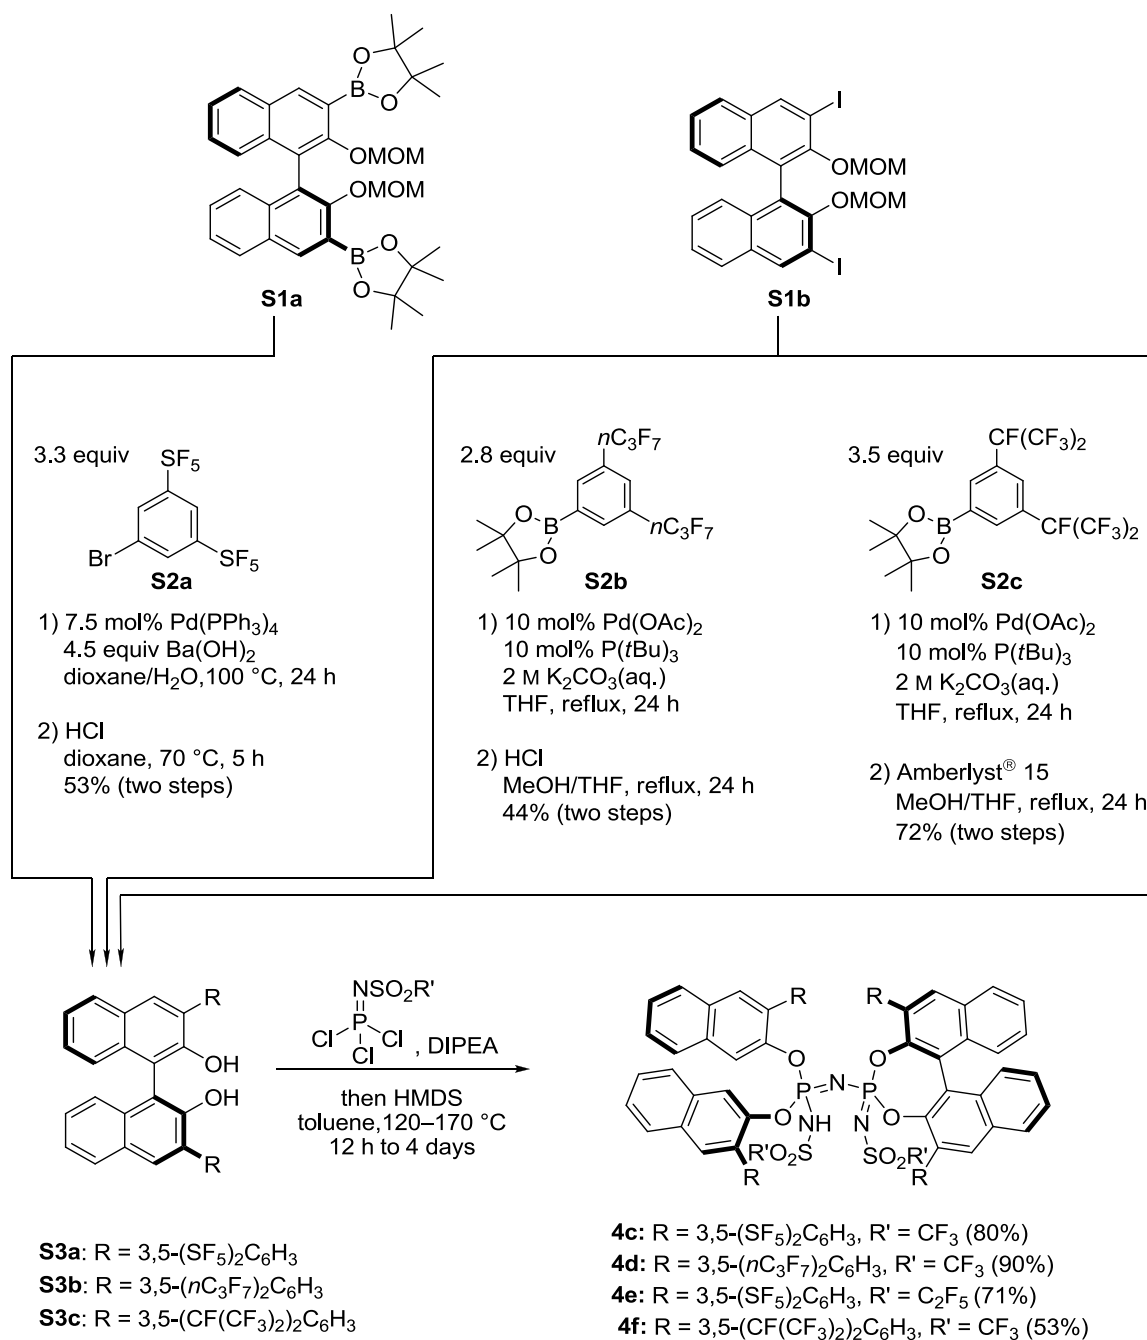

**Figure S1.** Synthesis of IDPis **4c–4f**.

## 2-(3,5-Bis(perfluoropropyl)phenyl)-4,4,5,5-tetramethyl-1,3,2-dioxaborol (S2b)

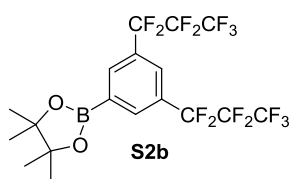

To a flame-dried Schlenk flask charged with activated copper powder (13 g, 0.20 mol, 8.0 equiv) were added degassed dry DMF (65 mL), 1,3-dibromobenzene (6.0 g, 25 mmol, 1.0 equiv), and perfluoropropyl iodide (20 g, 69 mmol, 2.8 equiv) under argon at room temperature. The mixture was then heated to 100 °C for 2 days. Upon completion of the reaction, the reaction mixture was cooled to room temperature, diluted with water (65 mL), filtered through celite, and washed with Et<sub>2</sub>O (150 mL). The filtrate was washed with HCl (1.0 M, aq., 100 mL) and extracted with Et<sub>2</sub>O (2×150 mL). The combined organic layers were dried over MgSO<sub>4</sub>, filtered, and concentrated under reduced pressure. Filtration through a short pad of silica gel using pentane as an eluent afforded 1,3-bis(perfluoropropyl)benzene (7.5 g, 18 mmol, 68%) as a colorless liquid which was then used for the next step without further purification.

To a flame-dried Schlenk flask charged with bis(1,5-cyclooctadiene)di-μ-methoxydiiridium(I) (0.31 g, 0.46 mmol, 0.05 equiv), 4,4'-di-*tert*-butyl-2,2'-dipyridyl (0.25 g, 0.92 mmol, 0.10 equiv), bis(pinacolato)diboron (3.5 g, 14 mmol, 1.5 equiv), and 1,3-bis(perfluoropropyl)benzene (3.8 g, 9.2 mmol, 1.0 equiv) was added dry THF (54 mL) under argon at room temperature. The mixture was then heated to 80 °C for 16 h. Upon completion of the reaction monitored by TLC, the reaction mixture was cooled to room temperature and concentrated under reduced pressure. Filtration through a short pad of silica gel using hexanes as an eluent afforded 2-(3,5-bis(perfluoropropyl)phenyl)-4,4,5,5-tetramethyl-1,3,2-dioxaborolane (**S2b**, 4.7 g, 93%) as a colorless solid which was then used for the next step without further purification.

**<sup>1</sup>H NMR** (500 MHz, CDCl<sub>3</sub>): δ 8.21 (d, *J* = 1.7 Hz, 2H), 7.85 (s, 1H), 1.37 (s, 12H).

**<sup>11</sup>B NMR** (160 MHz, CDCl<sub>3</sub>): δ 30.22.

**<sup>13</sup>C NMR** (126 MHz, CDCl<sub>3</sub>): 136.5 (t, *J* = 6.0 Hz, 2C), 131.4 (br, 1C), 129.3 (t, *J* = 24.7 Hz, 2C), 127.8 (q, *J* = 6.6 Hz, 1C), 118.1 (qt, *J* = 288, 34 Hz, 2C), 114.9 (tt, *J* = 256, 31 Hz, 2C), 108.7 (tq, *J* = 264, 38 Hz, 2C), 85.03 (s, 2C), 25.0 (s, 4C).

**<sup>19</sup>F NMR** (470 MHz, CDCl<sub>3</sub>): δ -126.2 (s, 4F), -112.1 (q, *J* = 9.8 Hz, 4F), -80 (t, *J* = 9.8 Hz, 6F).

**HRMS** (EI) (*m/z*): calculated for C<sub>18</sub>H<sub>15</sub>O<sub>2</sub>B<sub>1</sub>F<sub>14</sub> [M]: 540.0940; found: 540.0942.



## 2-(3,5-Bis(perfluoropropan-2-yl)phenyl)-4,4,5,5-tetramethyl-1,3,2-dioxaborolane (S2c)

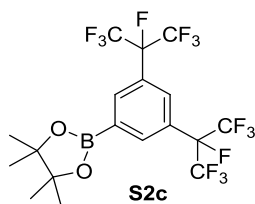

To a flame-dried Schlenk flask charged with activated copper powder (13 g, 0.20 mol, 8.0 equiv) were added degassed dry DMF (70 mL), 1,3-dibromobenzene (6.0 g, 25 mmol, 1.0 equiv), and heptafluoro-2-iodopropane (26 g, 87 mmol, 3.5 equiv) under argon at room temperature. The mixture was then heated to 100 °C for 2 d. Upon completion of the reaction, the reaction mixture was cooled to room temperature, diluted with water (70 mL), filtered through celite, and washed with Et<sub>2</sub>O (150 mL). The filtrate was washed with HCl (1.0 M, aq., 100 mL) and extracted with Et<sub>2</sub>O (2×150 mL). The combined organic layers were dried over MgSO<sub>4</sub>, filtered, and concentrated under reduced pressure. Filtration through a short pad of silica gel using pentane as an eluent afforded 1,3-bis(perfluoropropan-2-yl)benzene (5.1 g, 12 mmol, 50%) as a colorless liquid which was then used for the next step without further purification.

To a flame-dried Schlenk flask charged with bis(1,5-cyclooctadiene)di-μ-methoxydiiridium(I) (0.18 g, 0.27 mmol, 0.04 equiv), 4,4'-di-*tert*-butyl-2,2'-dipyridyl (0.14 g, 0.53 mmol, 0.08 equiv), bis(pinacolato)diboron (2.5 g, 10 mmol, 1.5 equiv), and 1,3-bis(perfluoropropan-2-yl)benzene (2.8 g, 6.7 mmol, 1.0 equiv) was added dry THF (30 mL) under argon at room temperature. The mixture was then heated to 80 °C for 16 h. Upon completion of the reaction monitored by TLC, the reaction mixture was cooled to room temperature and concentrated under reduced pressure. Filtration through a short pad of silica gel using hexanes as an eluent afforded 2-(3,5-bis(perfluoropropan-2-yl)phenyl)-4,4,5,5-tetramethyl-1,3,2-dioxaborolane (**S2c**, 3.1 g, 5.8 mmol, 86%) as a colorless solid which was then used for the next step without further purification.

**<sup>1</sup>H NMR** (500 MHz, CDCl<sub>3</sub>): δ 8.19 (d, *J* = 1.8 Hz, 2H), 7.90 (s, 1H), 1.37 (s, 12H).

**<sup>13</sup>C NMR** (126 MHz, CDCl<sub>3</sub>): δ 134.3 (d, *J* = 10.1 Hz), 127.4 (dd, *J* = 20.8, 2.5 Hz), 125.4 (t, *J* = 11.5 Hz), 120.3 (qd, *J* = 286.7, 27.9 Hz), 91.1 (dp, *J* = 203.6, 33.2 Hz), 84.8, 24.8.

**<sup>11</sup>B NMR** (160 MHz, CDCl<sub>3</sub>): δ 30.37.

**<sup>19</sup>F NMR** (470 MHz, CDCl<sub>3</sub>): δ -75.62 (d, *J* = 7.3 Hz, 12F), -182.48 (hept, *J* = 7.3 Hz, 2F).

**HRMS** (EI) (*m/z*): calculated for C<sub>18</sub>H<sub>15</sub>O<sub>2</sub>B<sub>1</sub>F<sub>14</sub> [*M*]: 540.0940; found: 540.0942.

**(S)-3,3'-Bis(3,5-bis(pentafluoro- $\lambda^6$ -sulfanyl)phenyl)-[1,1'-binaphthalene]-2,2'-diol (S3a)**

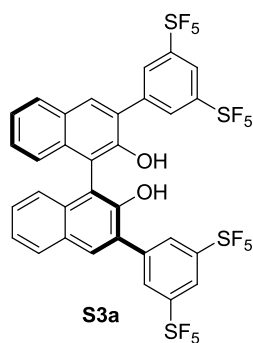

To a three-necked round bottom flask with a condenser were added barium hydroxide octahydrate (2.3 g, 7.2 mmol, 4.5 equiv), a 1,4-dioxane/H<sub>2</sub>O solution (3:1, 30 mL), (S)-2,2'-(2,2'-bis(methoxymethoxy)-[1,1'-binaphthyl]-3,3'-diyl)bis(4,4',5,5'-tetramethyl-1,3,2-dioxaborolane)<sup>25</sup> (**S1a**, 1.0 g, 1.6 mmol, 1.0 equiv), and 2,4-bis(pentafluorosulfanyl)bromobenzene (**S2a**, 2.17 g, 5.3 mmol, 3.3 equiv). After degassing the reaction mixture with argon for 20 min, tetrakis(triphenylphosphine)palladium (0.14 g, 0.12 mmol, 0.075 equiv) was added. The mixture was refluxed for 24 h, then cooled to room temperature, and quenched with HCl (10 mL, 1.0 M, aq.). After extraction with CH<sub>2</sub>Cl<sub>2</sub> (3×30 mL), the combined organic layers were successively washed with HCl (60 mL, 1.0 M, aq.), NaHCO<sub>3</sub> (60 mL, sat., aq.), and brine (60 mL). The organic layers were dried over Na<sub>2</sub>SO<sub>4</sub>, and concentrated under reduced pressure. 1,4-dioxane (90 mL) and HCl (30 mL, conc. aq.) were added to the residue and the reaction mixture was stirred at 70 °C for 5 h in a round bottom flask equipped with a condenser. After cooling to room temperature, the reaction solution was extracted with CH<sub>2</sub>Cl<sub>2</sub> (3×100 mL). The organic layers were combined, dried over Na<sub>2</sub>SO<sub>4</sub>, and the solvent was removed under reduced pressure. The residue was purified by column chromatography on silica gel using 5–10% ethyl acetate/hexanes to give (S)-3,3'-Bis(3,5-bis(pentafluoro- $\lambda^6$ -sulfanyl)phenyl)-[1,1'-binaphthalene]-2,2'-diol<sup>26</sup> (**S3a**, 1.0 g, 1.06 mmol, 66%) as a colorless solid.

**<sup>1</sup>H NMR** (500 MHz, CDCl<sub>3</sub>):  $\delta$  8.33 (d,  $J$  = 1.9 Hz, 4H), 8.17 (t,  $J$  = 1.9 Hz, 2H), 8.10 (s, 2H), 8.02 (d,  $J$  = 7.9 Hz, 2H), 7.50 (ddd,  $J$  = 8.0, 6.9, 1.0 Hz, 2H), 7.44 (ddd,  $J$  = 8.3, 6.9, 1.3 Hz, 2H), 7.22 (d,  $J$  = 8.3 Hz, 2H), 5.39 (s, 2H).

**<sup>13</sup>C NMR** (126 MHz, CDCl<sub>3</sub>):  $\delta$  153.9, 153.7, 153.6, 153.4, 153.3, 149.8, 139.6, 133.5, 132.7, 130.4, 129.6, 129.1, 127.1, 125.6, 124.1, 123.1, 111.9;  $\delta$  153.6 (p,  $J$  = 18.8 Hz).

**<sup>19</sup>F NMR** (470 MHz, CDCl<sub>3</sub>):  $\delta$  81.94 (p,  $J$  = 150.5 Hz), 63.09 (d,  $J$  = 150.5 Hz).

**HRMS** (ESI<sup>−</sup>) ( $m/z$ ): calculated for C<sub>32</sub>H<sub>17</sub>O<sub>2</sub>F<sub>20</sub>S<sub>4</sub> [M−H]<sup>−</sup>: 940.9798; found: 940.9803.

**(S)-3,3'-Bis(3,5-bis(perfluoropropyl)phenyl)-[1,1'-binaphthalene]-2,2'-diol (S3b)**

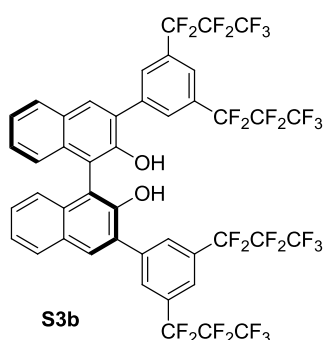

To a flame-dried two-necked round-bottom flask charged with (*S*)-3,3'-diiodo-2,2'-bis(methoxymethoxy)-1,1'-binaphthalene<sup>27</sup> (**S1b**, 1.9 g, 3.0 mmol, 1.0 equiv), 2-(3,5-bis(perfluoropropyl)phenyl)-4,4,5,5-tetramethyl-1,3,2-dioxaborolane (**S2b**, 4.6 g, 8.5 mmol, 2.8 equiv), and palladium(II)-acetate (68 mg, 0.30 mmol, 0.10 equiv) in THF (160 mL) was added K<sub>2</sub>CO<sub>3</sub> (2.0 M, aq., 18 mL) at room temperature. After degassing the reaction mixture with argon for 5 min, tri-*tert*-butylphosphine (1.0 M in toluene, 0.30 mmol, 0.10 equiv) was added to the mixture. The reaction mixture was then heated to 85 °C for 24 h. After cooling down to room temperature, HCl (10%, aq., 20 mL) was added and the reaction mixture was extracted three times with CH<sub>2</sub>Cl<sub>2</sub> (3×150 mL). The combined organic layers were dried over Na<sub>2</sub>SO<sub>4</sub> and concentrated under reduced pressure. The residue was purified by column chromatography on silica gel (*R*<sub>f</sub> 0.32, hexanes/CH<sub>2</sub>Cl<sub>2</sub>, 10:1) to give (*S*)-3,3'-bis(3,5-bis(perfluoropropyl)phenyl)-2,2'-bis(methoxymethoxy)-1,1'-binaphthalene (2.7 g, 2.3 mmol, 74%) as a colorless solid (HRMS (ESI<sup>+</sup>) (*m/z*): calculated for C<sub>48</sub>H<sub>26</sub>O<sub>4</sub>F<sub>28</sub>Na<sub>1</sub> [M+Na]<sup>+</sup>: 1221.1276; found 1221.1274).

To a round-bottom flask charged with (*S*)-3,3'-bis(3,5-bis(perfluoropropyl)phenyl)-2,2'-bis(methoxymethoxy)-1,1'-binaphthalene (2.7 g, 2.3 mmol) in MeOH (100 mL) and THF (20 mL) was added HCl (6.0 M, aq., 15 mL) at room temperature. The reaction mixture was then refluxed to 80 °C for 24 h and concentrated under reduced pressure. The residue was purified by column chromatography on silica gel (*R*<sub>f</sub> 0.52, hexanes/CH<sub>2</sub>Cl<sub>2</sub>, 10:1) to give (*S*)-3,3'-bis(3,5-bis(perfluoropropyl)phenyl)-[1,1'-binaphthalene]-2,2'-diol (**S3b**) as a colorless solid which was then recrystallized from a hot solution of hexanes and EtOAc (10:1) to provide the product as a colorless crystalline solid (1.5 g, 1.4 mmol, 60%).

**<sup>1</sup>H NMR** (600 MHz, CDCl<sub>3</sub>): δ 8.23 (d, *J* = 1.7 Hz, 4H), 8.11 (s, 2H), 8.01 (d, *J* = 8.0 Hz, 2H), 7.84–7.81 (m, 2H), 7.49 (ddd, *J* = 8.1, 6.8, 1.2 Hz, 2H), 7.43 (ddd, *J* = 8.2, 6.8, 1.3 Hz, 2H), 7.24 (d, *J* = 8.4 Hz, 2H), 5.38 (d, *J* = 0.7 Hz, 2H).

**<sup>13</sup>C NMR** (151 MHz, CDCl<sub>3</sub>): δ 150.0, 139.4, 133.5, 132.6, 131.7, 130.1, 130.0, 129.8, 129.6, 129.1, 128.9, 127.7, 125.4, 124.4, 124.2, 120.9, 119.2, 119.0, 118.8, 117.3, 117.1, 116.9, 116.8, 116.6, 116.4, 115.1, 114.9, 114.7, 113.4, 113.2, 113.0, 111.9, 110.7, 110.4, 109.1, 108.9, 108.6, 108.4, 107.1, 106.9; δ 131.7 (t, *J* = 6.0 Hz), 130.0 (t, *J* = 25.0 Hz), 124.4 (p, *J* =

6.5 Hz), 118.1 (qt,  $J = 288.0, 34.0$  Hz), 115.1 (tt,  $J = 256.0, 32.5$  Hz), 108.8 (th,  $J = 265.0, 38.0$  Hz).

$^{19}\text{F}$  NMR (470 MHz,  $\text{CDCl}_3$ ):  $\delta$  -79.92 (t,  $J = 9.8$  Hz), -111.91 (q,  $J = 9.8$  Hz), -126.16 (br s).

HRMS (ESI-) ( $m/z$ ): calculated for  $\text{C}_{44}\text{H}_{17}\text{O}_2\text{F}_{28}$   $[\text{M}-\text{H}]^-$ : 1109.0787; found: 1109.0790.

$[\alpha]_D^{25}$ : -20.6 ( $c = 0.36$ ,  $\text{CH}_2\text{Cl}_2$ ).

### (*S*)-3,3'-Bis(3,5-bis(perfluoropropan-2-yl)phenyl)-[1,1'-binaphthalene]-2,2'-diol (**S3c**)

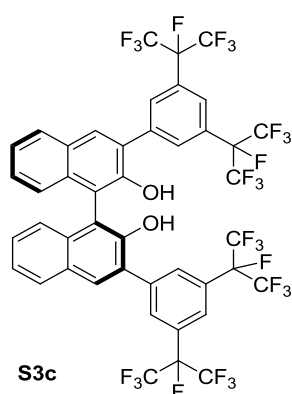

To a flame-dried two-necked round-bottom flask charged with (*S*)-3,3'-diiodo-2,2'-bis(methoxymethoxy)-1,1'-binaphthalene<sup>27</sup> (**S1b**, 0.25 g, 0.4 mmol, 1.0 equiv), 2-(3,5-bis(perfluoropropan-2-yl)phenyl)-4,4,5,5-tetramethyl-1,3,2-dioxaborolane (**S2c**, 0.76 g, 1.4 mmol, 3.5 equiv), and palladium(II)-acetate (9.0 mg, 0.04 mmol, 0.10 equiv) in THF (21 mL) was added  $\text{K}_2\text{CO}_3$  (2.0 M, aq., 2.4 mL) at room temperature. After degassing the reaction mixture with argon for 5 min, tri-*tert*-butylphosphine (1.0 M in toluene, 0.04 mmol, 0.10 equiv) was added to the mixture. The reaction mixture was then heated to 85 °C for 24 h. After cooling down to room temperature, HCl (10%, aq., 2.5 mL) was added and the reaction mixture was extracted three times with  $\text{CH}_2\text{Cl}_2$ . The combined organic layers were dried over  $\text{Na}_2\text{SO}_4$  and concentrated under reduced pressure. The residue was purified by column chromatography on silica gel ( $R_f$  0.56, hexanes/EtOAc, 20:1) to give (*S*)-3,3'-bis(3,5-bis(perfluoropropan-2-yl)phenyl)-2,2'-bis(methoxymethoxy)-1,1'-binaphthalene (0.37 g, 0.31 mmol, 77%) as a colorless solid (HRMS (ESI+) ( $m/z$ ): calculated for  $\text{C}_{48}\text{H}_{26}\text{O}_4\text{F}_{28}\text{Na}_1$   $[\text{M}+\text{Na}]^+$ : 1221.1276; found 1221.1285).

To a round-bottom flask charged with (*S*)-3,3'-bis(3,5-bis(perfluoropropan-2-yl)phenyl)-2,2'-bis(methoxymethoxy)-1,1'-binaphthalene (0.35 g, 0.29 mmol) in MeOH (6 mL) and THF (6 mL) was added Amberlyst® 15 ion-exchange resin (0.70 g) at room temperature. The reaction mixture was then refluxed at 80 °C for 24 h. The residue was purified by column chromatography on silica gel ( $R_f$  0.42, hexanes/ $\text{CH}_2\text{Cl}_2$ , 20:1) to give (*S*)-3,3'-Bis(3,5-bis(perfluoropropan-2-yl)phenyl)-[1,1'-binaphthalene]-2,2'-diol (**S3c**, 0.30 g, 0.27 mmol, 93%) as a colorless solid.

**<sup>1</sup>H NMR** (600 MHz, CDCl<sub>3</sub>): δ 8.22 (d, *J* = 1.7 Hz, 4H), 8.10 (s, 2H), 8.04–7.99 (m, 2H), 7.87 (s, 2H), 7.49 (ddd, *J* = 8.1, 6.8, 1.2 Hz, 2H), 7.43 (ddd, *J* = 8.3, 6.8, 1.3 Hz, 2H), 7.24 (ddt, *J* = 8.4, 1.4, 0.7 Hz, 2H), 5.38 (d, *J* = 0.7 Hz, 2H).

**<sup>13</sup>C NMR** (151 MHz, CDCl<sub>3</sub>): δ 150.0, 139.74, 139.72, 139.70, 133.4, 132.6, 129.9, 129.8, 129.6, 129.1, 128.8, 128.3, 128.2, 128.12, 128.10, 128.0, 125.4, 124.2, 123.5, 123.3, 122.3, 122.23, 122.15, 121.6, 121.4, 119.7, 119.5, 117.8, 117.6, 112.0, 92.5, 92.3, 92.0, 91.8, 91.6, 91.1, 90.9, 90.7, 90.5, 90.2; δ 139.72 (t, *J* = 2.3 Hz), 129.87 (d, *J* = 10.2 Hz), 128.18 (dd, *J* = 20.7, 2.3 Hz), 122.23 (t, *J* = 12.0 Hz), 120.73 (qd, *J* = 287.0, 28.0 Hz), 91.36 (dhept, *J* = 204.0, 33.0 Hz).

**<sup>19</sup>F NMR** (470 MHz, CDCl<sub>3</sub>): δ -75.43, -75.44, -181.96, -181.97, -181.99, -182.00, -182.02, -182.04, -182.05.

**HRMS** (ESI-) (*m/z*): calculated for C<sub>44</sub>H<sub>17</sub>O<sub>2</sub>F<sub>28</sub> [M-H]<sup>-</sup>: 1109.0787; found: 1109.0790.

[α]<sub>D</sub><sup>25</sup>: -27.8 (*c* = 0.26, CH<sub>2</sub>Cl<sub>2</sub>).

#### ((Perfluoroethyl)sulfonyl)phosphorimidoyl trichloride (**S4**)

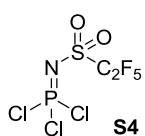

In a flame-dried flask under argon equipped with a magnetic stirring bar, which was connected to a gas wash bottle containing a NaOH solution (10 wt%, aq.), a cooling trap, and a vacuum pump in sequence, a mixture of 1,1,2,2,2-pentafluoroethane-1-sulfonamide (10.1 g, 51.0 mmol, 1.0 equiv) and PCl<sub>5</sub> (11.2 g, 54.0 mmol, 1.06 equiv) was heated to 100 °C under air pressure for 1 h. The reaction was monitored by <sup>1</sup>H, <sup>19</sup>F, and <sup>31</sup>P NMR to ensure full consumption of sulfonamide. Pumping off the excess amount of PCl<sub>5</sub> under reduced pressure to give the title compound **S4** (15.2 g, 45.5 mmol, 90%) as colorless oil.

**<sup>13</sup>C NMR** (126 MHz, CDCl<sub>3</sub>): δ 121.2, 121.0, 120.8, 119.0, 118.7, 118.4, 116.7, 116.44, 116.42, 116.2, 114.4, 114.1, 113.9, 113.5, 112.1, 111.8, 111.5, 111.2, 109.8, 109.5, 109.2, 108.8.

**<sup>19</sup>F NMR** (470 MHz, CDCl<sub>3</sub>): δ -78.8 (d, *J* = 13.5 Hz, 3F), -116.6 (d, *J* = 14.3 Hz, 2F).

**<sup>31</sup>P NMR** (203 MHz, CDCl<sub>3</sub>): δ 15.7.

**HRMS** (ESI+) (*m/z*): calculated for C<sub>2</sub>H<sub>1</sub>N<sub>1</sub>O<sub>2</sub>Cl<sub>3</sub>F<sub>5</sub>P<sub>1</sub>S<sub>1</sub> [M+H]<sup>+</sup>: 333.8451; found: 333.8452.

***N,N'*-((11*bS*,11*b'S*)-Azanediylbis(2,6-bis(3,5-bis(pentafluoro- $\lambda^6$ -sulfanyl)phenyl)-4 $\lambda^5$ -dinaphtho[2,1-*d*:1',2'-*f*][1,3,2]dioxaphosphepine-4-yl-4-ylidene))bis(1,1,1-trifluoromethanesulfonamide) (**4c**)**

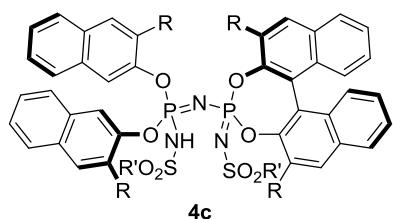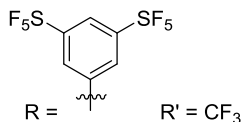

In a flame-dried flask under argon, diol **S3a** (0.1 g, 0.1 mmol, 2.1 equiv) was dissolved in toluene (1.4 mL). Subsequently, *N,N*-diisopropylethylamine (DIPEA, 0.14

mL, 0.80 mmol, 16.0 equiv), followed by trifluoromethylsulfonyl trichlorophosphazene (P(NTf)Cl<sub>3</sub>, 30.4 mg, 0.1 mmol, 2.1 equiv) were added and the solution was stirred at room temperature for 5 min. 1,1,1,3,3,3-hexamethyldisilazane (HMDS, 10.4 mg, 0.05 mmol, 1.0 equiv) was added to the reaction mixture, which was stirred at 120 °C for 12 h. The reaction mixture was cooled to room temperature and the solvent was removed under reduced pressure. The residue was purified by column chromatography on silica gel using 20–40% ethyl acetate/hexanes as the eluent affording a colorless solid. The solid was dissolved in CH<sub>2</sub>Cl<sub>2</sub> (25 mL) and stirred with HCl (6.0 M, aq., 25 mL) for 30 min. The organic layer was separated, washed with HCl (6.0 M, aq., 25 mL), and concentrated under reduced pressure to provide compound **4c** as a colorless solid (90 mg, 0.04 mmol, 80%).

**<sup>1</sup>H NMR** (500 MHz, CD<sub>2</sub>Cl<sub>2</sub>):  $\delta$  8.20 (br s, 2H), 8.18 (t,  $J$  = 1.75 Hz, 2H), 8.16–8.15 (m, 2H), 8.13 (br s, 2H), 7.97–7.94 (m, 2H), 7.92–7.91 (m, 2H), 7.87 (d,  $J$  = 1.60 Hz, 4H), 7.80–7.75 (m, 4H), 7.66 (t,  $J$  = 7.30 Hz, 2H), 7.48 (br s, 4H), 7.40–7.37 (m, 2H), 7.36 (s, 2H), 7.07 (d,  $J$  = 8.60 Hz, 2H), 6.58 (s, 2H), 4.93 (br s, 2H).

**<sup>13</sup>C NMR** (126 MHz, CD<sub>2</sub>Cl<sub>2</sub>):  $\delta$  154.0, 153.9, 153.8, 153.6, 144.0, 141.4, 138.6, 138.2, 134.0, 133.0, 132.6, 132.4, 132.3, 131.5, 130.84, 130.78, 130.1, 129.9, 129.61, 129.56, 128.7, 128.6, 127.9, 127.8, 127.14, 127.11, 124.5, 124.1, 123.9, 121.7, 120.3, 117.7.

**<sup>19</sup>F NMR** (470 MHz, CD<sub>2</sub>Cl<sub>2</sub>):  $\delta$  80.8 (sext,  $J$  = 152.0 Hz, 8F), 63.1 (d,  $J$  = 150.6 Hz, 16F), 62.3 (d,  $J$  = 150.0 Hz, 16F), –79.5 (s, 6F).

**<sup>31</sup>P NMR** (202 MHz, CD<sub>2</sub>Cl<sub>2</sub>):  $\delta$  –15.3.

**HRMS** (ESI<sup>–</sup>) ( $m/z$ ): calculated for C<sub>66</sub>H<sub>32</sub>N<sub>3</sub>O<sub>8</sub>F<sub>46</sub>P<sub>2</sub>S<sub>10</sub> [M–H]<sup>–</sup>: 2249.8143; found: 2249.8128.

***N,N'*-((11*bS*,11*b'S*)-Azanediylbis(2,6-bis(3,5-bis(perfluoropropyl)phenyl)-4λ<sup>5</sup>-dinaphtho[2,1-*d*:1',2'-*f*][1,3,2]dioxaphosphepine-4-yl-4-ylidene))bis(1,1,1-trifluoromethanesulfonamide) (**4d**)**

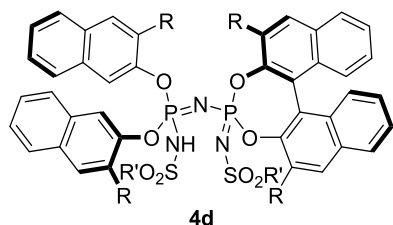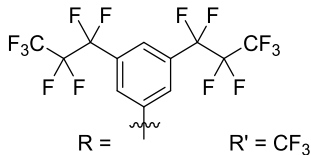

In a flame-dried flask under argon, diol **S3b** (0.60 g, 0.54 mmol, 2.1 equiv) was dissolved in toluene (5.0 mL, 0.1 M). Subsequently, P(NTf)<sub>3</sub> (0.15 g, 0.54 mmol, 2.1

equiv), followed by DIPEA (0.53 g, 4.1 mmol, 16.0 equiv) were added and the solution was stirred at room temperature for 15 min. HMDS (42 mg, 0.26 mmol, 1.0 equiv) was added to the reaction mixture, which was stirred at room temperature for 10 min, and heated to 130 °C for 3 days. The reaction mixture was cooled to room temperature, diluted with CH<sub>2</sub>Cl<sub>2</sub> (5 mL), and stirred with HCl (6.0 M, aq., 3 mL) for 30 min. The organic phase was then separated, dried with MgSO<sub>4</sub>, filtered, and concentrated under reduced pressure. The residue was purified by column chromatography on silica gel (*R<sub>f</sub>* 0.58, hexanes/EtOAc, 5:1) to afford a colorless solid, which was then acidified in CH<sub>2</sub>Cl<sub>2</sub> (6 mL) with HCl (6.0 M, aq., 6 mL) by stirring at room temperature for 30 min. The organic layer was diluted with CH<sub>2</sub>Cl<sub>2</sub> (14 mL), washed with HCl (6.0 M, aq., 2×20 mL), followed by drying under reduced pressure to provide compound **4d** as a colorless solid (0.60 g, 0.23 mmol, 90%).

**<sup>1</sup>H NMR** (500 MHz, CDCl<sub>3</sub>): δ 8.12–8.05 (m, 4H), 7.93–7.86 (m, 4H), 7.77–7.64 (m, 13H), 7.61 (t, *J* = 7.6 Hz, 2H), 7.40–7.35 (m, 2H), 7.32 (s, 4H), 7.13 (d, *J* = 8.6 Hz, 2H), 6.57 (s, 2H).

**<sup>13</sup>C NMR** (126 MHz, CDCl<sub>3</sub>): δ 144.0, 141.8, 138.2, 138.0, 133.7, 132.3, 132.0, 132.0, 131.9, 131.6, 131.2, 130.9, 130.7, 130.4, 130.21, 130.15, 130.11, 130.0, 129.9, 129.7, 129.2, 128.7, 128.0, 127.2, 127.1, 126.8, 125.3, 123.67, 123.66, 123.65, 122.73, 121.72, 121.52, 121.45, 121.42, 121.24, 121.18, 120.9, 120.2, 119.4, 119.22, 119.17, 119.0, 118.9, 118.7, 117.6, 117.2, 116.94, 116.88, 116.8, 116.71, 116.67, 116.61, 116.55, 116.47, 116.4, 116.31, 116.30, 116.2, 115.1, 114.9, 114.8, 114.67, 114.66, 114.6, 114.5, 114.42, 114.39, 114.33, 114.26, 114.2, 114.1, 112.7, 112.6, 112.5, 112.4, 112.2, 112.1, 111.6, 111.30, 111.29, 110.99, 110.98, 110.68, 110.68, 110.39, 110.38, 110.07, 110.07, 109.8, 109.5, 109.19, 109.18, 108.89, 108.88, 108.58, 108.58, 108.28, 108.27, 107.97, 107.96, 107.7, 107.4, 107.09, 107.08, 106.78, 106.78, 106.48, 106.47, 106.17, 106.16, 105.86, 105.86, 105.58; δ 130.15 (t, *J* = 25.0 Hz), 129.90 (t, *J* = 25.0 Hz), 118.91 (q, *J* = 319.9 Hz), 118.02 (qt, *J* = 287.0, 34.0 Hz), 117.82 (qt, *J* = 287.0, 34.0 Hz),

114.51 (tt,  $J = 256.9, 30.9$  Hz), 114.42 (tt,  $J = 256.6, 30.8$  Hz), 108.73 (th,  $J = 264.2, 38.0$  Hz), 108.43 (th,  $J = 264.2, 38.0$  Hz).

$^{19}\text{F}$  NMR (470 MHz,  $\text{CDCl}_3$ ):  $\delta$  -78.94 (s), -80.04 (t,  $J = 9.3$  Hz), -80.20 (t,  $J = 9.6$  Hz), -112.20 (d,  $J = 276.8$  Hz), -112.55 (s), -113.78 (d,  $J = 276.8$  Hz), -126.05 (d,  $J = 291.0$  Hz), -126.11 (s), -126.47 (d,  $J = 291.0$  Hz).

$^{31}\text{P}$  NMR (202 MHz,  $\text{CDCl}_3$ ):  $\delta$  -13.92.

HRMS (ESI-) ( $m/z$ ): calculated for  $\text{C}_{90}\text{H}_{32}\text{N}_3\text{O}_8\text{F}_{62}\text{P}_2\text{S}_2$   $[\text{M}-\text{H}]^-$ : 2586.0122; found: 2586.0086.

$[\alpha]_D^{25}$ : +208.4 ( $c = 0.50$ ,  $\text{CHCl}_3$ ).

***N,N'*-((11bS,11b'S)-Azanediylbis(2,6-bis(3,5-bis(pentafluoro- $\lambda^6$ -sulfanyl)phenyl)-4 $\lambda^5$ -dinaphtho[2,1-*d*:1',2'-*f*][1,3,2]dioxaphosphepine-4-yl-4-ylidene))bis(1,1,2,2,2-pentafluoroethane-1-sulfonamide) (4e)**

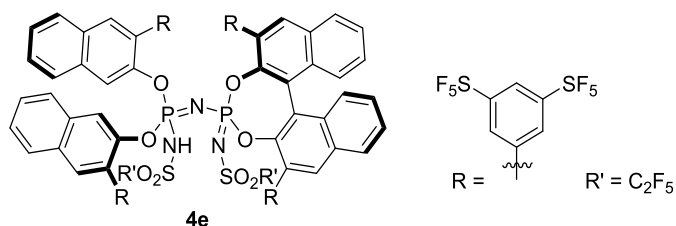

In a flame-dried flask under argon, diol **S3a** (0.11 g, 0.12 mmol, 2.1 equiv) was dissolved in toluene (1.0 mL, 0.12 M). Subsequently, ((perfluoroethyl)-sulfonyl)phosphorimidoyl trichloride,

$\text{P}(\text{NSO}_2\text{C}_2\text{F}_5)\text{Cl}_3$  (**S4**, 39 mg, 0.12 mmol, 2.1 equiv), followed by DIPEA (0.11 g, 0.89 mmol, 16.0 equiv) were added and the solution was stirred at room temperature for 15 min. HMDS (9.0 mg, 0.06 mmol, 1.0 equiv) was added to the reaction mixture, which was stirred at room temperature for 10 min, and heated to 130 °C for 3 days. The reaction mixture was cooled to room temperature, diluted with  $\text{CH}_2\text{Cl}_2$  (3 mL), and stirred with HCl (6.0 M, aq., 1 mL) for 30 min. The organic phase was then separated, dried with  $\text{MgSO}_4$ , filtered, and concentrated under reduced pressure. The residue was purified by column chromatography on silica gel ( $R_f$  0.28, hexanes/EtOAc, 2:1) to give a colorless solid, which was then acidified in  $\text{CH}_2\text{Cl}_2$  (2 mL) with HCl (6.0 M, aq., 2 mL) by stirring at room temperature for 30 min. The organic layer was diluted with  $\text{CH}_2\text{Cl}_2$  (8 mL), washed with HCl (6.0 M, aq., 2×10 mL), followed by drying under reduced pressure to provide compound **4e** as a colorless solid (93 mg, 0.04 mmol, 71%).



**<sup>1</sup>H NMR** (500 MHz, CDCl<sub>3</sub>): δ 8.17–8.07 (m, 8H), 7.93–7.85 (m, 4H), 7.83 (s, 4H), 7.78 (d, *J* = 8.5 Hz, 2H), 7.72 (ddd, *J* = 8.2, 6.3, 1.6 Hz, 2H), 7.63 (t, *J* = 7.6 Hz, 2H), 7.47–7.35 (m, 6H), 7.06 (d, *J* = 8.6 Hz, 2H), 6.52 (s, 2H).

**<sup>13</sup>C NMR** (126 MHz, CDCl<sub>3</sub>): δ 143.8, 141.5, 138.4, 137.7, 133.8, 132.5, 132.3, 132.1, 131.9, 131.0, 130.4, 130.23, 130.15, 129.4, 129.0, 128.3, 127.4, 127.3, 127.2, 126.7, 124.2, 123.9, 121.5.

**<sup>19</sup>F NMR** (470 MHz, CDCl<sub>3</sub>): δ 81.14 (p, *J* = 151.0 Hz), 80.97 (p, *J* = 151.0 Hz), 63.32 (d, *J* = 151.0 Hz), 62.51 (d, *J* = 151.0 Hz), –79.01, –117.08.

**<sup>31</sup>P NMR** (202 MHz, CDCl<sub>3</sub>): δ –14.39.

**HRMS** (ESI–) (*m/z*): calculated for C<sub>68</sub>H<sub>32</sub>N<sub>3</sub>O<sub>8</sub>F<sub>50</sub>P<sub>2</sub>S<sub>10</sub> [M–H]<sup>–</sup>: 2349.8079; found: 2349.8069.

[α]<sub>D</sub><sup>25</sup>: +201.3 (*c* = 0.15, CH<sub>2</sub>Cl<sub>2</sub>).

***N,N'*-((11b*S*,11b'*S*)-Azanediylbis(2,6-bis(3,5-bis(perfluoropropan-2-yl)phenyl)-4λ<sup>5</sup>-dinaphtho[2,1-*d*:1',2'-*f*][1,3,2]dioxaphosphepine-4-yl-4-ylidene))bis(1,1,1-trifluoromethanesulfonamide) (4f)**

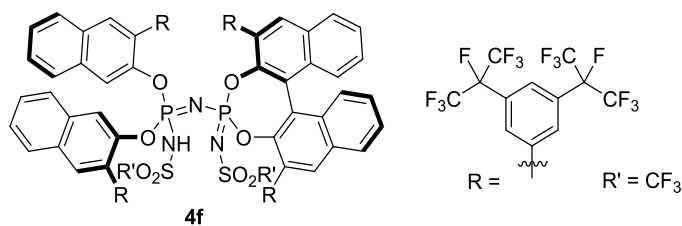

In a flame-dried flask under argon, diol **S3c** (0.15 g, 0.14 mmol, 2.1 equiv) was dissolved in toluene (1.0 mL, 0.14 M). Subsequently, P(NTf)<sub>3</sub> (38 mg, 0.14 mmol, 2.1 equiv), followed by

DIPEA (0.13 g, 0.98 mmol, 16.0 equiv) were added and the solution was stirred at room temperature for 15 min. HMDS (10 mg, 0.06 mmol, 1.0 equiv) was added to the reaction mixture, which was stirred at room temperature for 10 min, and heated to 170 °C for 4 d. The reaction mixture was cooled to room temperature, diluted with CH<sub>2</sub>Cl<sub>2</sub> (3 mL), and stirred with HCl (6.0 M, aq., 1 mL) for 30 min. The organic phase was then separated, dried with MgSO<sub>4</sub>, filtered, and concentrated under reduced pressure. The residue was purified by column chromatography on silica gel (*R*<sub>f</sub> 0.20, hexanes/EtOAc, 4:1) to give a colorless solid, which was then acidified in CH<sub>2</sub>Cl<sub>2</sub> (2 mL) with HCl (6.0 M, aq., 2 mL) by stirring at room temperature for 30 min. The organic layer was diluted with CH<sub>2</sub>Cl<sub>2</sub> (8 mL), washed with HCl

(6.0 M, aq., 2×10 mL), followed by drying under reduced pressure to provide compound **4f** as a colorless solid (84 mg, 0.03 mmol, 53%).

**<sup>1</sup>H NMR** (600 MHz, CDCl<sub>3</sub>): δ 8.06 (d, *J* = 8.2 Hz, 2H), 8.01 (s, 2H), 7.90 (d, *J* = 8.0 Hz, 2H), 7.87 (dd, *J* = 8.0, 6.9 Hz, 2H), 7.82 (s, 4H), 7.77 (s, 2H), 7.72 (s, 2H), 7.65 (dd, *J* = 8.7, 6.9 Hz, 3H), 7.63 (d, *J* = 8.7 Hz, 3H), 7.58 (dd, *J* = 8.2, 6.9 Hz, 2H), 7.42 (s, 4H), 7.29 (dd, *J* = 8.7, 6.9 Hz, 2H), 6.88 (d, *J* = 8.7 Hz, 2H), 6.63 (s, 2H).

**<sup>13</sup>C NMR** (151 MHz, CDCl<sub>3</sub>): δ 144.3, 141.7, 138.8, 138.7, 134.7, 132.9, 132.3, 132.2, 131.9, 131.04, 130.98, 130.4, 130.2, 130.1, 129.7, 129.30, 129.25, 129.0, 128.6, 128.5, 128.3, 127.9, 127.5, 127.11, 127.06, 126.8, 123.7, 123.35, 123.29, 123.2, 123.11, 123.08, 122.9, 122.8, 121.8, 121.6, 121.45, 121.39, 121.3, 121.20, 121.19, 121.0, 119.7, 119.55, 119.50, 119.4, 119.31, 119.29, 119.1, 117.9, 117.7, 117.62, 117.61, 117.5, 117.42, 117.40, 117.2, 115.5, 92.3, 92.1, 91.8, 91.6, 91.4, 90.9, 90.7, 90.5, 90.3, 90.0; δ 120.41 (qd, *J* = 287.0, 27.0 Hz), 120.35 (qd, *J* = 287.0, 27.0 Hz), 120.15 (qd, *J* = 287.0, 28.0 Hz), 118.67 (q, *J* = 318.0 Hz), 91.16 (dhept, *J* = 205.0, 33.0 Hz).

**<sup>19</sup>F NMR** (470 MHz, CDCl<sub>3</sub>): δ -74.79, -75.30, -75.92, -76.11, -79.29, -181.21, -182.75.

**<sup>31</sup>P NMR** (202 MHz, CDCl<sub>3</sub>): δ -14.31.

**HRMS** (ESI-) (*m/z*): calculated for C<sub>90</sub>H<sub>32</sub>N<sub>3</sub>O<sub>8</sub>F<sub>62</sub>P<sub>2</sub>S<sub>2</sub> [M-H]<sup>-</sup>: 2586.0122; found: 2586.0108.

[α]<sub>D</sub><sup>25</sup>: +235.8 (*c* = 0.44, CH<sub>2</sub>Cl<sub>2</sub>).

## Optimization of Reaction Conditions

**Table S1.** Comparison of different chiral Brønsted acids<sup>a</sup>.

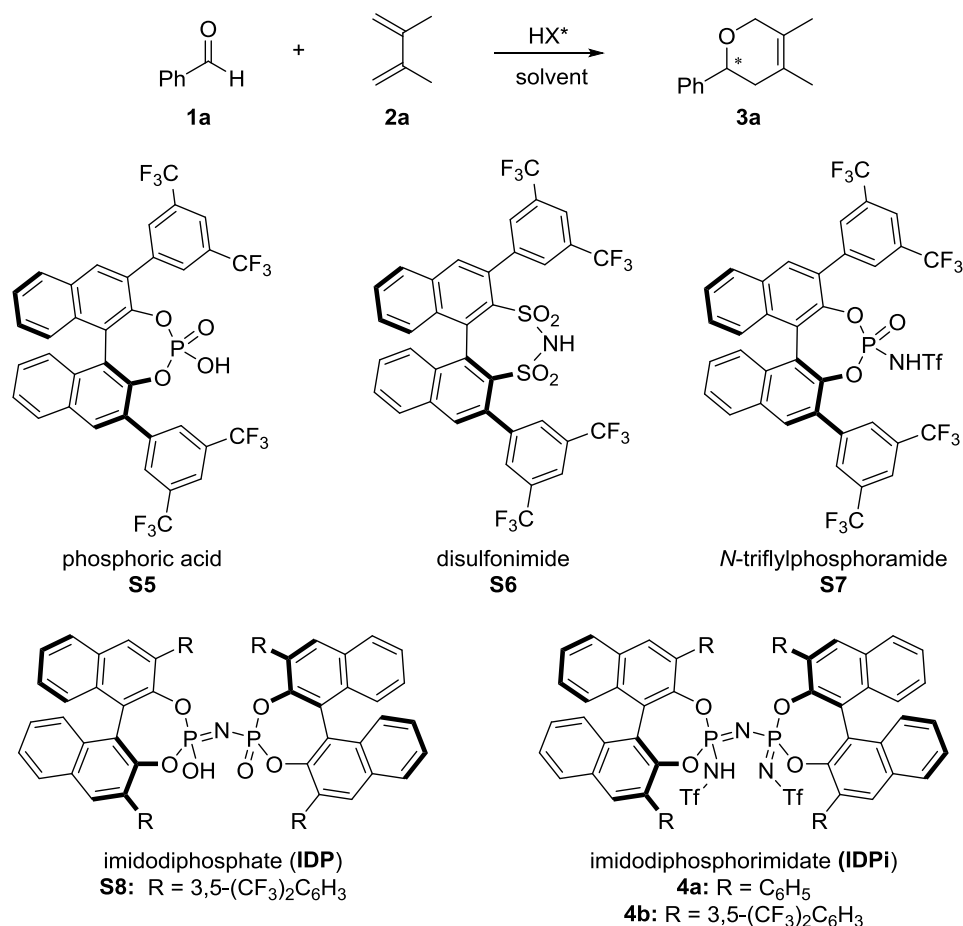

| entry | catalyst <sup>b</sup> | HX* (mol%) | T (°C) | t (h) | solvent | conv. (%) <sup>c</sup> | e.r. <sup>d</sup> |
|-------|-----------------------|------------|--------|-------|---------|------------------------|-------------------|
| 1     | <b>S5</b>             | 5          | 22     | 24    | CyH     | n.r.                   | -                 |
| 2     | <b>S6</b>             | 5          | 22     | 24    | CyH     | n.r.                   | -                 |
| 3     | <b>S7</b>             | 5          | 22     | 24    | CyH     | 11                     | 64:36             |
| 4     | <b>S8</b>             | 5          | 22     | 24    | CyH     | n.r.                   | -                 |
| 5     | <b>4a</b>             | 5          | 22     | 24    | CyH     | <10                    | 59:41             |
| 6     | <b>4b</b>             | 5          | 22     | 24    | CyH     | >95                    | 79:21             |

<sup>a</sup> Unless otherwise indicated, reactions were performed with benzaldehyde (**1a**, 0.02 mmol), 2,3-dimethyl-1,3-butadiene (**2a**, 0.1 mmol), and a catalyst (5 mol%) in cyclohexane (CyH, 0.2 mL) at room temperature for 24 h and no side product was observed. <sup>b</sup> Catalysts were prepared according to the known procedures: **S5**<sup>15</sup>, **S6**<sup>16</sup>, **S7**<sup>18</sup>, **S8**<sup>28</sup>, **4a** and **4b**<sup>19</sup>. <sup>c</sup> Conversion ratios were determined by <sup>1</sup>H NMR analysis by comparison to 1,2,4,5-tetramethylbenzene as an internal standard after addition of TEA. <sup>d</sup> The enantiomeric ratio was measured by HPLC analysis on a chiral stationary phase.

**Table S2.** Screening IDPis **4b-4c** and optimization<sup>a</sup>.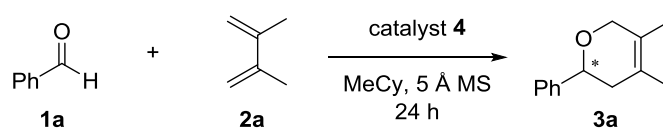

| entry          | catalyst  | HX* (mol%) | MeCy (μL) | T (°C) | conv. (%) <sup>b</sup> | e.r. <sup>c</sup> |
|----------------|-----------|------------|-----------|--------|------------------------|-------------------|
| 1              | <b>4c</b> | 5          | 200       | 22     | >95                    | 90:10             |
| 2              | <b>4b</b> | 5          | 200       | −20    | <10                    | 85:15             |
| 3              | <b>4c</b> | 1          | 200       | −20    | >95                    | 98:2              |
| 4 <sup>d</sup> | <b>4c</b> | 1          | 67        | −20    | >95                    | 98:2              |
| 5              | <b>4c</b> | 0.2        | 67        | −20    | >95                    | 98:2              |

<sup>a</sup> Unless otherwise indicated, reactions were performed with aldehyde **1a** (0.02 mmol), diene **2a** (0.1 mmol), a catalyst, and 5 Å molecular sieves (70 mg/mL) in methylcyclohexane (MeCy) for 24 h and no side product was observed. <sup>b</sup> Conversion ratios were determined by <sup>1</sup>H NMR analysis by comparison to 1,2,4,5-tetramethylbenzene as an internal standard after quenching reactions by addition of TEA. <sup>c</sup> The enantiomeric ratio was measured by HPLC analysis on a chiral stationary phase. <sup>d</sup> The reaction was completed within 4 h.

**Table S3.** Optimization of the ratio of substrates<sup>a</sup>.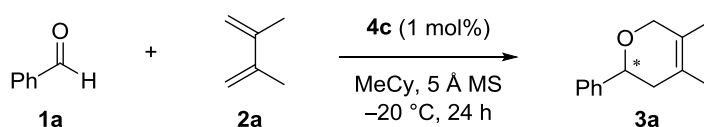

| entry | <b>1a</b> (mmol) | <b>2a</b> (mmol) | conv. (%) <sup>b</sup> | e.r. <sup>c</sup> |
|-------|------------------|------------------|------------------------|-------------------|
| 1     | 0.1              | 0.5              | >95                    | 98:2              |
| 2     | 0.1              | 0.2              | >95                    | 98:2              |
| 3     | 0.1              | 0.12             | >95                    | 98:2              |
| 4     | 0.12             | 0.1              | >95                    | 98:2              |

<sup>a</sup> Unless otherwise indicated, reactions were performed with aldehyde **1a**, diene **2a**, catalyst **4c**, and 5 Å molecular sieves (21 mg) in MeCy (0.3 mL) at −20 °C for 24 h and no side product was observed. <sup>b</sup> Conversion ratios were determined by <sup>1</sup>H NMR analysis by comparison to 1,2,4,5-tetramethylbenzene as an internal standard after quenching reactions by addition of TEA. <sup>c</sup> The enantiomeric ratio was measured by HPLC analysis on a chiral stationary phase.

## The role of molecular sieves

In the absence of 5 Å molecular sieves, the reaction proceeded slightly slower (Table S4, entry 2). However, the enantioselectivity remained essential the same, suggesting a pure Brønsted acid-catalysis, not a Lewis acid catalysis potentially introduced by the metal species in 5 Å molecular sieves with a formula of  $0.7\text{CaO}\cdot 0.30\text{Na}_2\text{O}\cdot \text{Al}_2\text{O}_3\cdot 2.0\text{SiO}_2\cdot 4.5\text{H}_2\text{O}$ .

**Table S4.** Effect of molecular sieves<sup>a</sup>.

| entry | 5 Å MS | conv. (%) <sup>b</sup> | e.r. <sup>c</sup> |
|-------|--------|------------------------|-------------------|
| 1     | 21 mg  | >95                    | 98:2              |
| 2     | —      | 92                     | 97.5:2.5          |

<sup>a</sup> Unless otherwise indicated, reactions were performed with aldehyde **1a** (0.1 mmol), diene **2a** (0.5 mmol), catalyst **4c** (5 mol%), and 5 Å molecular sieves (21 mg) in MeCy (0.3 mL) at  $-20\text{ }^{\circ}\text{C}$  for 24 h and no side product was observed. <sup>b</sup> Conversion ratios were determined by  $^1\text{H}$  NMR analysis by comparison to 1,2,4,5-tetramethylbenzene as an internal standard after quenching reactions by addition of TEA. <sup>c</sup> The enantiomeric ratio was measured by HPLC analysis on a chiral stationary phase.

**Table S5.** Optimization of the reaction between aldehyde **1i** and diene **2a**<sup>a</sup>.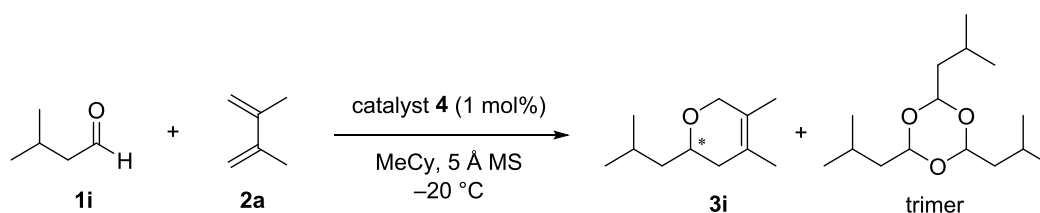

| entry | catalyst  | <b>2a</b> (equiv) | t (d) | conv. (%) <sup>b</sup> | <b>3i</b> (%) <sup>b</sup> | trimer (%) <sup>b</sup> | e.r. <sup>c</sup> |
|-------|-----------|-------------------|-------|------------------------|----------------------------|-------------------------|-------------------|
| 1     | <b>4b</b> | 5                 | 7     | 87                     | 7                          | 80                      | 89:11             |
| 2     | <b>4c</b> | 5                 | 7     | 98                     | 55                         | 43                      | 91:9              |
| 3     | <b>4c</b> | 10                | 7     | 100                    | 99                         | 0                       | 92:8              |
| 4     | <b>4d</b> | 10                | 3     | 96                     | 96                         | 0                       | 94:6              |

<sup>a</sup> Reactions were performed on a 0.03 mmol scale of aldehyde **1i** in MeCy (0.1 mL). <sup>b</sup> Yields and conversion ratios were determined by <sup>1</sup>H NMR analysis by comparison to triphenylmethane as an internal standard after addition of TEA. <sup>c</sup> The enantiomeric ratio was measured by GC analysis on a chiral stationary phase.

**Table S6.** Optimization of the reaction between aldehyde **1k** and diene **2a**<sup>a</sup>.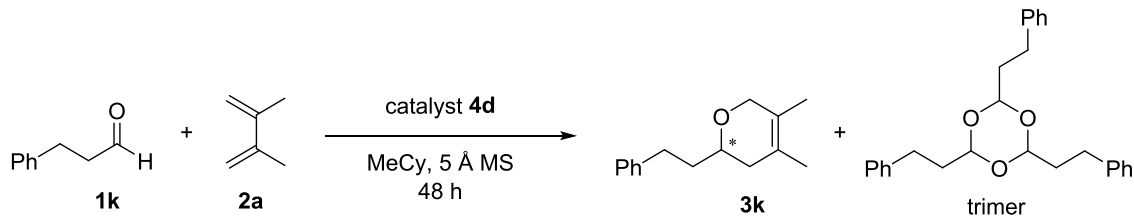

| entry | HX* (mol%) | <b>2a</b> (equiv) | T (°C) | conv. (%) <sup>b</sup> | <b>3k</b> (%) <sup>b</sup> | trimer (%) <sup>b</sup> | e.r. <sup>c</sup> |
|-------|------------|-------------------|--------|------------------------|----------------------------|-------------------------|-------------------|
| 1     | 1          | 10                | -20    | 99                     | 7                          | 92                      | 97:3              |
| 2     | 1          | 20                | -20    | 100                    | 20                         | 80                      | 96:4              |
| 3     | 2          | 10                | -20    | 99                     | 25                         | 74                      | 95:5              |
| 4     | 1          | 10                | -10    | 100                    | 76                         | 0                       | 95.5:4.5          |
| 5     | 1          | 10                | -5     | 97                     | 65                         | 0                       | 94:6              |
| 6     | 1          | 10                | 23     | 100                    | 55                         | 0                       | 92:8              |

<sup>a</sup> Reactions were performed on a 0.03 mmol scale of aldehyde **1k** in MeCy (0.1 mL). <sup>b</sup> Yields and conversion ratios were determined by <sup>1</sup>H NMR analysis by comparison to triphenylmethane as an internal standard after addition of TEA. <sup>c</sup> The enantiomeric ratio was measured by GC analysis on a chiral stationary phase.

**Table S7.** Optimization of the reaction between aldehyde **1o** and diene **2a**.<sup>a</sup>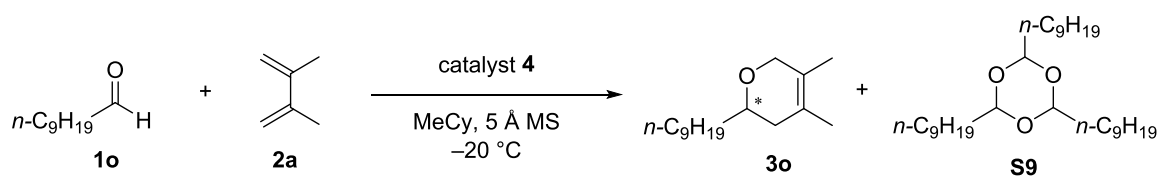

| entry | catalyst  | HX* (mol%) | <b>2a</b> (equiv) | t (h) | conv. (%) <sup>b</sup> | <b>3o</b> (%) <sup>b</sup> | <b>S9</b> (%) <sup>b</sup> | e.r. <sup>c</sup> |
|-------|-----------|------------|-------------------|-------|------------------------|----------------------------|----------------------------|-------------------|
| 1     | <b>4c</b> | 1          | 10                | 20    | 94                     | 4.5                        | 89                         | -                 |
| 2     | <b>4c</b> | 1          | 10                | 57    | 97                     | 17                         | 79.5                       | -                 |
| 3     | <b>4d</b> | 1          | 10                | 12    | 97                     | 34                         | 63                         | 97:3              |
| 4     | <b>4d</b> | 1          | 10                | 24    | 97                     | 57                         | 40                         | 97:3              |
| 5     | <b>4d</b> | 1          | 10                | 48    | 100                    | 94                         | trace                      | 97:3              |
| 6     | <b>4d</b> | 0.5        | 10                | 48    | 100                    | 94                         | trace                      | 97:3              |
| 7     | <b>4d</b> | 1          | 5                 | 48    | 99                     | 54                         | 45                         | 97:3              |
| 8     | <b>4d</b> | 3          | 10                | 12    | 95                     | 30.5                       | 65                         | 97:3              |
| 9     | <b>4d</b> | 5          | 10                | 12    | 96.5                   | 31                         | 66                         | 97:3              |

<sup>a</sup> Reactions were performed on a 0.03 mmol scale of aldehyde **1o** in MeCy (0.1 mL). <sup>b</sup> Yields and conversion ratios were determined by <sup>1</sup>H NMR analysis by comparison to triphenylmethane as an internal standard after addition of TEA. <sup>c</sup> The enantiomeric ratio was measured by GC analysis on a chiral stationary phase.

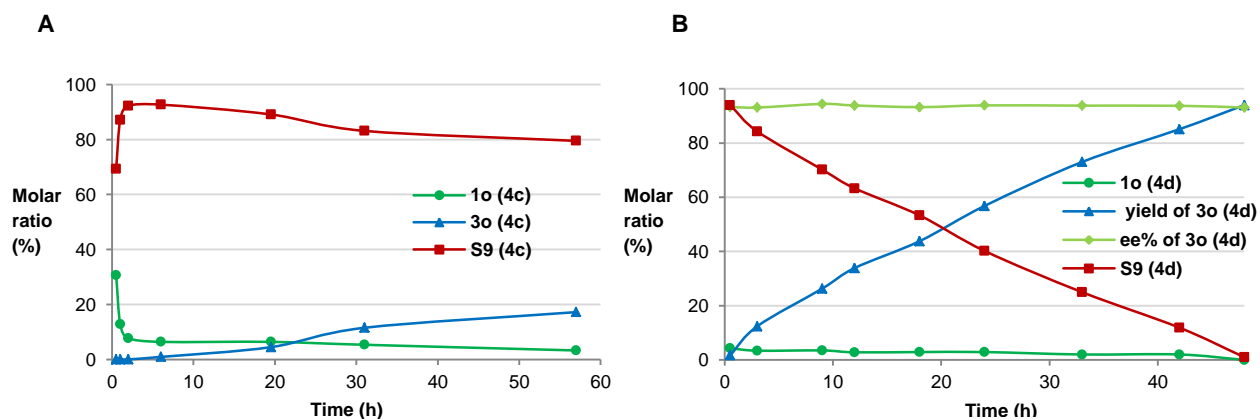

**Figure S2.** Kinetic experiments of the HDA reaction of aldehyde **1o** and diene **2a**<sup>a</sup>.

<sup>a</sup> Reactions were performed with aldehyde **1o** (0.15 mmol), diene **2a** (1.5 mmol), and 1 mol% of catalyst **4c** (A) or **4d** (B) in MeCy (0.5 mL) at  $-20\text{ }^{\circ}\text{C}$ . Yields were determined by  $^1\text{H}$  NMR analysis and the enantiomeric ratio was measured by GC analysis on a chiral stationary phase.

The hetero-Diels–Alder reaction of **1o** and **2a** was investigated using **4c** and **4d** as the catalyst (Fig. S2). In the case of **4c** as the catalyst, the rate of trimerization exceeded the rate of cycloaddition (Fig. S2, A). In contrast, in the presence of catalyst **4d**, the rapidly generated trimer (**S9**) was constantly consumed, furnishing the cycloadduct (**3o**) over time (Fig. S2, B). Trimer **S9** was not afforded in the absence of the catalyst. It was also possible to use trimer **S9** as the starting material for the cycloaddition, producing **3o** in 96% yield with 96:4 e.r. (1 mol% **4d**,  $-20\text{ }^{\circ}\text{C}$ , 48 h). In all cases, the monomer aldehyde (**1o**) was detected by  $^1\text{H}$  NMR spectroscopy throughout the reaction, indicating a dynamic equilibrium between aldehyde **1o** and trimer **S9**.

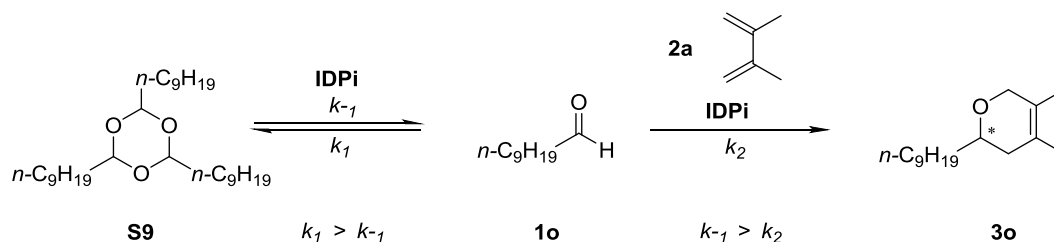



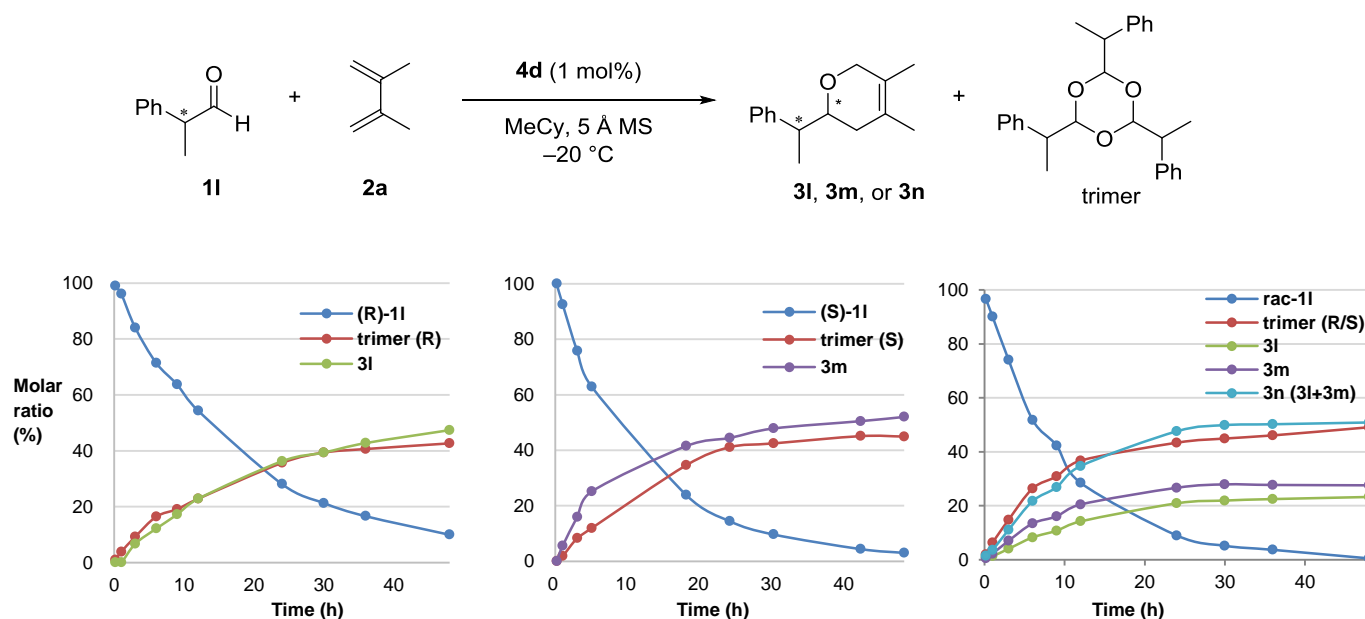

**Figure S3.** Kinetic experiments of hetero-Diels–Alder reaction of aldehyde **1l** and diene **2a**<sup>a</sup>.

<sup>a</sup> Reactions were performed with aldehyde **1l** (0.15 mmol), diene **2a** (1.5 mmol), and 1 mol% of catalyst **4d** in MeCy (0.5 mL) at –20 °C. Yields were determined by <sup>1</sup>H NMR analysis.

Despite the improved efficiency of the cycloaddition reaction using catalyst **4d** for most aliphatic aldehydes, the acid catalyzed trimerization of the alpha-branched aldehyde (**1l**) was found to be irreversible and a competitive process to the desired cycloaddition. Consequently, low yields of cycloadducts **3l**, **3m**, and **3n** were observed (Fig. S3).

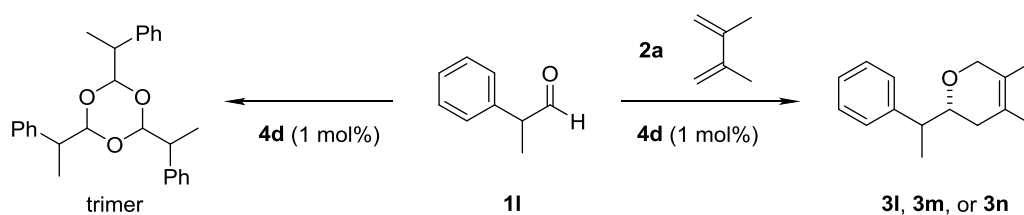

**Table S8.** Optimization of the reaction between aldehyde **1u** and diene **2b**<sup>a</sup>.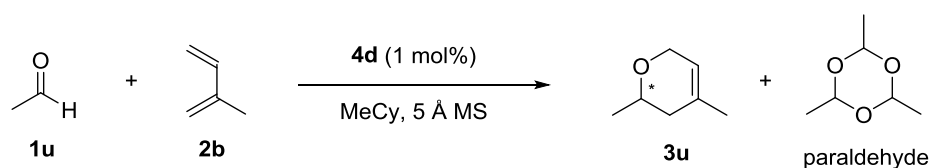

| entry           | starting material           | catalyst  | HX* (mol%) | additive             | t (d) | <b>3u</b> (%) <sup>b</sup> | e.r. <sup>c</sup> |
|-----------------|-----------------------------|-----------|------------|----------------------|-------|----------------------------|-------------------|
| 1               | <b>1u</b> (non-distilled)   | <b>4d</b> | 1          | -                    | 2     | 45                         | 90.5:9.5          |
| 2               | <b>1u</b> (non-distilled)   | <b>4d</b> | 1          | -                    | 5     | 33                         | 90:10             |
| 3               | <b>1u</b> (distilled)       | <b>4d</b> | 1          | -                    | 4     | 1                          | nd                |
| 4 <sup>d</sup>  | <b>1u</b> (distilled)       | <b>4d</b> | 1          | -                    | 5     | 3                          | nd                |
| 5               | <b>1u</b> (distilled)       | <b>4d</b> | 1          | 10 mol% acetic acid  | 2     | 22                         | 90:10             |
| 6               | <b>1u</b> (distilled)       | <b>4d</b> | 1          | 15 mol% acetic acid  | 2     | 29                         | 91:9              |
| 7               | <b>1u</b> (distilled)       | <b>4d</b> | 1          | 30 mol% acetic acid  | 2     | 27                         | 91:9              |
| 8               | <b>1u</b> (distilled)       | <b>4d</b> | 1          | 50 mol% acetic acid  | 2     | 31                         | 90:10             |
| 9               | <b>1u</b> (distilled)       | <b>4d</b> | 1          | 100 mol% acetic acid | 2     | 13                         | 86:14             |
| 10              | <b>1u</b> (distilled)       | <b>4d</b> | 1          | 200 mol% acetic acid | 2     | 12                         | 86.5:13.5         |
| 11              | <b>1u</b> (distilled)       | <b>4d</b> | 1          | 400 mol% acetic acid | 2     | 10                         | 86.5:13.5         |
| 12              | <b>1u</b> (distilled)       | <b>4c</b> | 1          | 15 mol% acetic acid  | 2     | 39                         | 85:15             |
| 13              | <b>1u</b> (distilled)       | <b>4e</b> | 1          | 15 mol% acetic acid  | 2     | 41                         | 87:13             |
| 14              | <b>1u</b> (distilled)       | <b>4f</b> | 1          | 15 mol% acetic acid  | 2     | 2                          | 74:26             |
| 15              | <b>1u</b> (distilled)       | <b>4d</b> | 2          | 50 mol% acetic acid  | 3     | 45                         | 90:10             |
| 16              | <b>1u</b> (distilled)       | <b>4d</b> | 3          | 50 mol% acetic acid  | 2.5   | 50                         | 89:11             |
| 17 <sup>e</sup> | <b>1u</b> (distilled)       | <b>4d</b> | 1          | 50 mol% acetic acid  | 2.5   | 22                         | 85:15             |
| 18              | paraldehyde (non-distilled) | <b>4d</b> | 1          | -                    | 5     | 33                         | 86:14             |
| 19              | paraldehyde (distilled)     | <b>4d</b> | 1          | -                    | 5     | 9                          | 89:11             |
| 20              | paraldehyde (distilled)     | <b>4d</b> | 2          | 50 mol% acetic acid  | 3     | 45                         | 90:10             |

<sup>a</sup> Reactions were performed on a 0.10 mmol scale of aldehyde **1u** (or 33 μmol of paraldehyde) and 1.5 mmol of diene **2b** in MeCy (0.33 mL). <sup>b</sup> Yields and conversion ratios were determined by <sup>1</sup>H NMR analysis by comparison to triphenylmethane as an internal standard after addition of TEA. <sup>c</sup> The enantiomeric ratio was measured by GC analysis on a chiral stationary phase. <sup>d</sup> The reaction was performed for 4 d at –20 °C followed by 1 d at room temperature. <sup>e</sup> 0.16 mL of MeCy was used.

**Table S9.** Effects of acetic acid<sup>a</sup>.

| entry | 1 | additive            | t (h) | conv. (%) <sup>b</sup> | 3 (%) <sup>b</sup> | trimer (%) <sup>b</sup> | e.r. <sup>c</sup>                                             |
|-------|---|---------------------|-------|------------------------|--------------------|-------------------------|---------------------------------------------------------------|
| 1     |   | 15 mol% acetic acid | 48    | 99                     | 13                 | 85                      | 96:4                                                          |
| 2     |   | –                   | 48    | 99                     | 7                  | 91                      | 96:4                                                          |
| 3     |   | 15 mol% acetic acid | 48    | 96                     | 10                 | 86                      | 97:3                                                          |
| 4     |   | –                   | 48    | 100                    | 94                 | trace                   | 97:3                                                          |
| 5     |   | 15 mol% acetic acid | 24    | 20                     | 6                  | 14                      | <i>syn:anti</i> >20:1<br><i>e.r.<sub>syn</sub></i> >99.5:0.5  |
| 6     |   | –                   | 24    | 72                     | 36                 | 36                      | <i>syn:anti</i> >20:1<br><i>e.r.<sub>syn</sub></i> >99.5:0.5  |
| 7     |   | 15 mol% acetic acid | 24    | 44                     | 22                 | 21                      | <i>anti:syn</i> >20:1<br><i>e.r.<sub>anti</sub></i> >99.5:0.5 |
| 8     |   | –                   | 24    | 85                     | 44                 | 41                      | <i>anti:syn</i> >20:1<br><i>e.r.<sub>anti</sub></i> >99.5:0.5 |

<sup>a</sup> Reactions were performed on a 0.03 mmol scale of aldehydes and 0.3 mmol of diene **2a** in MeCy (0.1 mL). <sup>b</sup> Yields and conversion ratios were determined by <sup>1</sup>H NMR analysis by comparison to triphenylmethane as an internal standard after addition of TEA. <sup>c</sup> The enantiomeric ratio was measured by GC analysis on a chiral stationary phase.

The hetero-Diels–Alder reaction of acetaldehyde **1u** and diene **2a** was investigated (Table S8). Initially, it was found that reactions using different commercial batches of acetaldehyde, which contained varying amounts of acetaldehyde, acetic acid, and paraldehyde, irreproducibly generated cycloadduct **3u** (Table S8, entries 1 and 2). However, reactions using distilled acetaldehyde (prepared as a stock solution in MeCy) or paraldehyde proved to be inactive under the reaction conditions, even at elevated temperature (entries 3, 4, and 19). Interestingly, the addition of acetic acid indeed triggered the cycloaddition reaction, and the catalytic amount of acetic acid could improve the yield without diminishing the enantioselectivity (Table S8, entries 5–8 vs. 9–11). Other IDPis (**4c**, **4e**, and **4f**) proved to be less reactive and/or less stereoselective (Table S8, entries 6 vs. 12–14). Higher loadings of

catalyst **4d** and prolonged reaction times increased the yield while a higher concentration decreased the yield and enantioselectivity (Table S8, entries 15–17). In contrast, the assistive effect of acetic acid was not effective for other aliphatic aldehydes (Table S9). In most cases, the desired cycloaddition reactions showed a reduced rate of the conversion and/or yield, plausibly caused by the predominant generation of their corresponding trimers.

**Table S10.** Optimization of the reaction for aldehyde **1i** and diene **2b**<sup>a</sup>.

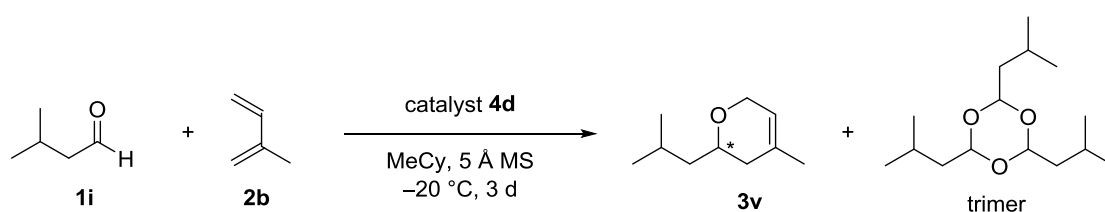

| entry | HX* (mol%) | <b>2b</b> (equiv) | conv. (%) <sup>b</sup> | <b>3v</b> (%) <sup>b</sup> | trimer (%) <sup>b</sup> | e.r. <sup>c</sup> |
|-------|------------|-------------------|------------------------|----------------------------|-------------------------|-------------------|
| 1     | 0.5        | 10                | 88                     | 39                         | 48                      | 93:7              |
| 2     | 1          | 10                | 96                     | 20                         | 76                      | 89:11             |
| 3     | 1          | 15                | 100                    | 87                         | 0                       | 94:6              |
| 4     | 1          | 20                | 93                     | 76                         | 17                      | 93:7              |

<sup>a</sup> Reactions were performed on a 0.03 mmol scale of aldehyde **1i** in MeCy (0.1 mL). <sup>b</sup> Yields and conversion ratios were determined by <sup>1</sup>H NMR analysis by comparison to triphenylmethane as an internal standard after addition of TEA. <sup>c</sup> The enantiomeric ratio was measured by GC analysis on a chiral stationary phase.

**Table S11.** Optimization of the reaction for aldehyde **1a** and diene **2f**<sup>a</sup>.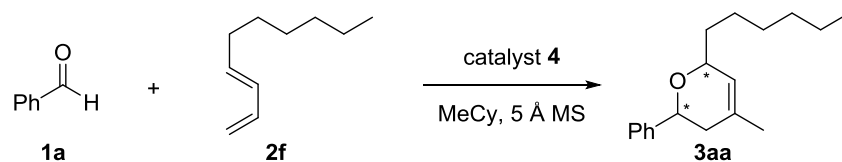

| entry | catalyst  | HX* (mol%) | T (°C) | t (d) | conv. (%) <sup>b</sup> | <i>trans</i> : <i>cis</i> <sup>b</sup> | e.r. <i>trans</i> <sup>c</sup> |
|-------|-----------|------------|--------|-------|------------------------|----------------------------------------|--------------------------------|
| 1     | <b>4d</b> | 2          | −30    | 3     | 18                     | 10:1                                   | 98:2                           |
| 2     | <b>4e</b> | 2          | −30    | 3     | >95                    | 12:1                                   | >99.5:0.5                      |
| 3     | <b>4e</b> | 0.5        | −30    | 3     | >95                    | 32:1                                   | >99.5:0.5                      |

<sup>a</sup> Unless otherwise indicated, reactions were performed with aldehyde **1a** (0.03 mmol), diene **2f** (0.3 mmol), a catalyst, and 5 Å molecular sieves (7 mg) in MeCy (0.1 mL). <sup>b</sup> Conversion ratios were determined by <sup>1</sup>H NMR analysis by comparison to 1,2,4,5-tetramethylbenzene as an internal standard after quenching reactions by addition of TEA. <sup>c</sup> The enantiomeric ratio was measured by HPLC analysis on a chiral stationary phase.

**Table S12.** Optimization of the reaction for aldehyde **1a** and diene **2h**<sup>a</sup>.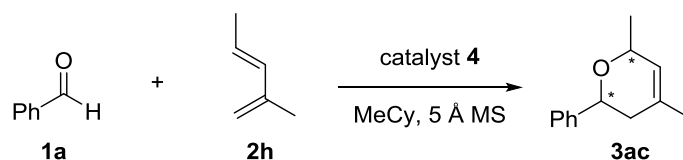

| entry | catalyst  | HX* (mol%) | T (°C) | t (h) | conv. (%) <sup>b</sup> | <i>cis</i> : <i>trans</i> <sup>b</sup> | e.r. <i>cis</i> <sup>c</sup> |
|-------|-----------|------------|--------|-------|------------------------|----------------------------------------|------------------------------|
| 1     | <b>4c</b> | 1          | −60    | 24    | >95                    | 1.4:1                                  | N.D.                         |
| 2     | <b>4d</b> | 1          | −60    | 24    | >95                    | 7:1                                    | 95:5                         |
| 3     | <b>4f</b> | 1          | −60    | 24    | <10                    | 10:1                                   | 90:10                        |

<sup>a</sup> Unless otherwise indicated, reactions were performed with aldehyde **1a** (0.02 mmol), diene **2h** (0.1 mmol), a catalyst, and 5 Å molecular sieves (14 mg) in MeCy (0.2 mL). <sup>b</sup> Conversion ratios were determined by <sup>1</sup>H NMR analysis by comparison to 1,2,4,5-tetramethylbenzene as an internal standard after quenching reactions by addition of TEA. <sup>c</sup> The enantiomeric ratio was measured by HPLC analysis on a chiral stationary phase.

**Table S13.** Optimization of the reaction for aldehyde **1a** and diene **2i**<sup>a</sup>.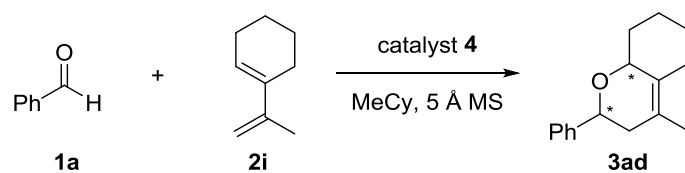

| entry | catalyst  | HX* (mol%) | T (°C) | t (h) | conv. (%) <sup>b</sup> | <i>cis:trans</i> <sup>b</sup> | e.r. <sub><i>cis</i></sub> <sup>c</sup> |
|-------|-----------|------------|--------|-------|------------------------|-------------------------------|-----------------------------------------|
| 1     | <b>4d</b> | 1          | −60    | 48    | >95                    | 2.5:1                         | 97.5:2.5                                |
| 2     | <b>4d</b> | 1          | −30    | 24    | >95                    | 3:1                           | 96:2                                    |
| 3     | <b>4f</b> | 1          | −30    | 24    | >95                    | 10:1                          | 94.2:5.8                                |

<sup>a</sup> Unless otherwise indicated, reactions were performed with aldehyde **1a** (0.03 mmol), diene **2i** (0.15 mmol), a catalyst, and 5 Å molecular sieves (21 mg) in MeCy (0.3 mL). <sup>b</sup> Conversion ratios were determined by <sup>1</sup>H NMR analysis by comparison to 1,2,4,5-tetramethylbenzene as an internal standard after quenching reactions by addition of TEA. <sup>c</sup> The enantiomeric ratio was measured by HPLC analysis on a chiral stationary phase.

## Substrate Synthesis and Characterization

Substrates (*R*)-**1l**, (*S*)-**1l**, **1p**, **1q**, **2f**, **2g**, and **2i** have been previously reported<sup>19, 29–32</sup>. Aldehydes (*R*)-**1l** and (*S*)-**1l** were synthesized from the corresponding alcohols via a Dess-Martin oxidation and the optical purities of products were determined using reported methods<sup>19, 29</sup>. Aldehydes **1p** and **1q** were prepared from the corresponding alcohols via a Jones oxidation<sup>30</sup>. Dienes **2f** and **2g** were prepared from the corresponding aldehydes via a Wittig reaction<sup>31</sup>. Diene **2i** was prepared from the corresponding ketone via Wittig reaction<sup>32</sup>.

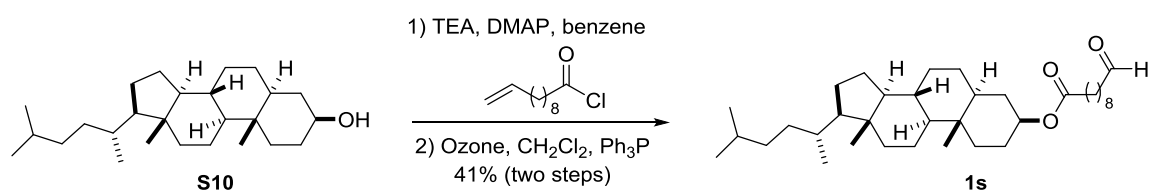

**Figure S4.** Synthesis of dihydrocholesterol-derivatized aldehyde **1s**.

### (3*S*,5*S*,8*R*,9*S*,10*S*,13*R*,14*S*,17*R*)-10,13-dimethyl-17-((*R*)-5-methylhexan-2-yl)hexadecahydro-1*H*-cyclopenta[*a*]phenanthren-3-yl 10-oxodecanoate (**1s**)

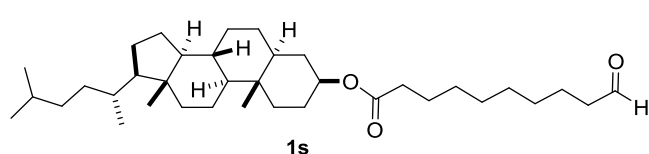

To a round-bottom flask were added dihydrocholesterol (**S10**, 1.2 g, 3.0 mmol, 1.0 equiv), 4-(dimethylamino)-pyridine (DMAP, 18.3 mg, 0.15 mmol, 0.05 equiv),

benzene (18.0 mL), trimethylamine (TEA, 0.46 mL, 3.3 mmol, 1.1 equiv), and followed by the addition of 10-undecenoyl chloride (1.0 mL, 4.5 mmol, 1.5 equiv). The reaction mixture was stirred at room temperature for 12 h. The solvent was removed under reduced pressure and the residue was purified by column chromatography on silica gel using 5–10% ethyl acetate/hexanes as the eluent giving the corresponding alkene as a colorless solid (0.98 g, 1.8 mmol, 59%). To a round bottom flask were added the obtained alkene (0.55 g, 1.0 mmol, 1.0 equiv), triphenylphosphine (Ph<sub>3</sub>P, 0.80 g, 3.0 mmol, 3.0 equiv), and CH<sub>2</sub>Cl<sub>2</sub> (10 mL), followed by the bubbling of the ozone at –40 °C until the starting material was fully consumed. The solvent was removed under reduced pressure and the residue was purified by column chromatography on silica gel using 5–10% ethyl acetate/hexanes as eluents to give **1s** as a colorless solid (0.38 g, 0.69 mmol, 69%).

**<sup>1</sup>H NMR** (500 MHz, CD<sub>2</sub>Cl<sub>2</sub>): δ 9.72 (s, 1H), 4.66 (hept, *J* = 4.6 Hz, 1H), 2.39 (dt, *J* = 7.4, 1.6 Hz, 2H), 2.23 (t, *J* = 7.5 Hz, 2H), 1.97 (td, *J* = 12.6, 3.2 Hz, 1H), 1.85–1.71 (m, 3H), 1.67–1.43 (m, 10.6H), 1.38–0.95 (m, 28H), 0.91 (d, *J* = 6.5 Hz, 3H), 0.86 (dd, *J* = 6.6, 1.9 Hz, 6H), 0.82 (s, 3H), 0.69–0.63 (m, 4H).

**<sup>13</sup>C NMR** (126 MHz, CD<sub>2</sub>Cl<sub>2</sub>): δ 203.1, 173.5, 73.7, 56.9, 56.7, 54.7, 45.1, 44.3, 43.0, 40.5, 39.9, 37.2, 36.6, 36.3, 35.92, 35.87, 35.0, 34.5, 32.5, 29.6, 29.50, 29.48, 29.4, 29.1, 28.6, 28.4, 28.0, 25.4, 24.6, 24.2, 23.0, 22.7, 22.5, 21.6, 18.9, 12.4, 12.2.

**HRMS** (ESI+) (*m/z*): calculated for C<sub>37</sub>H<sub>64</sub>O<sub>3</sub>Na<sub>1</sub> [M+Na]<sup>+</sup>: 579.4748; found: 579.4756.

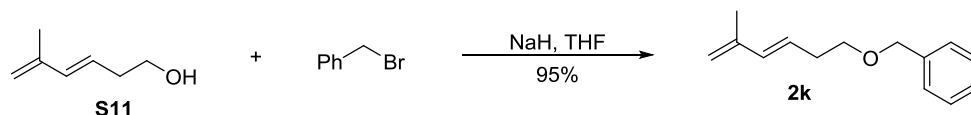

**Figure S5.** Synthesis of diene **2k**.

**(*E*)-(((5-methylhexa-3,5-dien-1-yl)oxy)methyl)benzene (**2k**)**

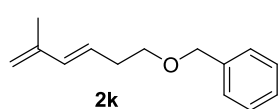

To a round-bottom flask were added the starting alcohol (**S11**, 300 mg, 2.67 mmol), Benzyl bromide (0.64 mL, 5.35 mmol), and THF (2 mL), followed by the addition of NaH (60% dispersion in Mineral oil, 214 mg, 5.35 mmol). The reaction mixture was stirred at room temperature for 12 h. The reaction mixture was then quenched with 20 mL saturated aqueous NH<sub>4</sub>Cl solution, and the aqueous phase was extracted with Et<sub>2</sub>O (3×30 mL). The combined organic layer was dried over anhydrous MgSO<sub>4</sub>. The solvent was removed under reduced pressure and the residue was purified by column chromatography on silica gel using 1–3% ethyl acetate/hexanes as the eluent to give **2k** as a colorless oil (514 mg, 2.54 mmol, 95%).

**<sup>1</sup>H NMR** (500 MHz, CDCl<sub>3</sub>): δ 7.39–7.34 (m, 4H), 7.31–7.28 (m, 1H), 6.22 (d, *J* = 15.7 Hz, 1H), 5.68 (td, *J* = 15.7, 7.0 Hz, 1H), 4.89 (br s, 2H), 4.53 (br s, 2H), 3.54 (t, *J* = 6.8 Hz, 2H), 2.44 (q, *J* = 6.9 Hz, 2H), 1.84 (s, 3H).

**<sup>13</sup>C NMR** (126 MHz, CDCl<sub>3</sub>): δ 142.1, 138.6, 134.7, 128.6, 128.5, 127.9, 127.83, 127.78, 127.71, 126.9, 115.0, 73.1, 70.0, 33.4, 18.8.

**HRMS** (ESI+) (*m/z*): calculated for C<sub>14</sub>H<sub>18</sub>O<sub>1</sub>Na<sub>1</sub> [M+Na]<sup>+</sup>: 225.1250; found: 225.1249.



## General Procedure for the Asymmetric [4+2]-Cycloaddition

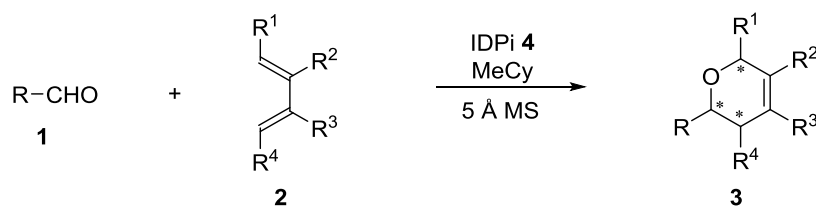

Unless specified otherwise, in a flame-dried flask under argon, catalyst **4** (0.2–3 mol%) and 5 Å molecular sieves (70 mg/mL) were dissolved in MeCy (0.3–10.0 mL). Subsequently, aldehyde **1** (0.1–0.3 mmol) and diene **2** (0.2–3.0 mmol) were added. Purification was performed by column chromatography or preparative thin layer chromatography on silica gel using 2–6% diethyl ether/pentane as the eluent. The corresponding racemic samples were prepared according to the reported method.<sup>13a</sup>

## Characterization of Cycloadducts

### (*R*)-4,5-dimethyl-2-phenyl-3,6-dihydro-2*H*-pyran (**3a**)

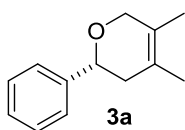

Aldehyde **1a** (10.6 mg, 0.1 mmol, 1.0 equiv) and diene **2a** (16.4 mg, 0.2 mmol, 2.0 equiv) were added to a mixture of catalyst **4c** (1 mol%) and 5 Å molecular sieves (21 mg) in MeCy (0.3 mL) at  $-78\text{ }^{\circ}\text{C}$ , then the reaction mixture was stirred at  $-20\text{ }^{\circ}\text{C}$  for 24 h. **3a** was obtained as a colorless oil (18.2 mg, 0.097 mmol, 97%).

**$^1\text{H}$  NMR** (600 MHz,  $\text{CD}_2\text{Cl}_2$ ):  $\delta$  7.39–7.34 (m, 4H), 7.28 (tt,  $J = 7.1, 1.6\text{ Hz}$ , 1H), 4.54 (dd,  $J = 10.6, 3.5\text{ Hz}$ , 1H), 4.21 (pd,  $J = 15.5, 1.0\text{ Hz}$ , 1H), 4.09 (d,  $J = 15.5\text{ Hz}$ , 1H), 2.30–2.24 (m, 1H), 2.10 (dd,  $J = 16.7, 0.6\text{ Hz}$ , 1H), 1.72 (br s, 3H), 1.62–1.616 (m, 3H).

**$^{13}\text{C}$  NMR** (151 MHz,  $\text{CD}_2\text{Cl}_2$ ):  $\delta$  143.5, 128.6, 127.6, 126.2, 125.0, 124.2, 76.5, 70.6, 39.0, 18.5, 14.0.

**HRMS** (ESI+) ( $m/z$ ): calculated for  $\text{C}_{13}\text{H}_{16}\text{O}_1\text{Na}_1$   $[\text{M}+\text{Na}]^+$ : 211.1093; found: 211.1092.

$[\alpha]_D^{20}$ : +224.0 ( $c = 0.50$ ,  $\text{CHCl}_3$ ).

**GC**: The enantiomeric ratio was measured by GC analysis on a chiral column (Hydrodex-gamma-TBDAC column: 25.0 m; i.D. 0.25mm); FID; Temperature:  $220\text{ }^{\circ}\text{C}$  (injector),  $350\text{ }^{\circ}\text{C}$

(detector), 100 °C (108 min, iso); Gas: H<sub>2</sub> (0.50 bar); t<sub>R</sub> = 88.43 min (major) and t<sub>R</sub> = 92.67 min (minor), e.r. = 98:2.

**(R)-2-(2-fluorophenyl)-4,5-dimethyl-3,6-dihydro-2H-pyran (3b)**

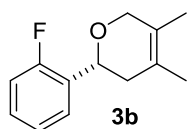

Aldehyde **1b** (12.4 mg, 0.1 mmol, 1.0 equiv) and diene **2a** (16.4 mg, 0.2 mmol, 2.0 equiv) were added to a mixture of catalyst **4c** (1 mol%) and 5 Å molecular sieves (21 mg) in MeCy (0.3 mL) at -78 °C, then the reaction mixture was stirred at -10 °C for 72 h. **3b** was obtained as a colorless oil (16.6 mg, 0.081 mmol, 81%).

**<sup>1</sup>H NMR** (500 MHz, CDCl<sub>3</sub>): δ 7.51 (dt, *J* = 7.5, 1.6 Hz, 1H), 7.25–7.22 (m, 1H), 7.15 (dt, *J* = 7.6, 0.8 Hz, 1H), 7.01 (ddd, *J* = 10.2, 8.2, 0.8 Hz, 1H), 4.86 (dd, *J* = 10.6, 3.6 Hz, 1H), 4.24 (d, *J* = 15.5 Hz, 1H), 4.12 (d, *J* = 15.5 Hz, 1H), 2.28–2.22 (m, 1H), 2.14 (d, *J* = 16.6 Hz, 1H), 1.69 (br s, 3 H), 1.60 (br s, 3 H).

**<sup>13</sup>C NMR** (126 MHz, CDCl<sub>3</sub>): δ 160.7, 158.7, 130.0, 129.9, 129.6, 128.8, 128.7, 128.4, 127.24, 127.20, 126.4, 124.48, 124.45, 124.0, 115.3, 115.1, 70.4, 70.35, 70.33, 37.7, 18.4, 14.0.

**HRMS** (ESI+) (*m/z*): calculated for C<sub>13</sub>H<sub>15</sub>O<sub>1</sub>F<sub>1</sub>Na<sub>1</sub> [*M*+Na]<sup>+</sup>: 229.0999; found: 229.1000.

[α]<sub>D</sub><sup>20</sup>: +178.4 (*c* = 0.50, CHCl<sub>3</sub>).

**HPLC**: The enantiomeric ratio was measured by HPLC analysis using Chiralpak IA-3, i.D. 4.6 mm. Heptane/<sup>i</sup>PrOH = 99.5:0.5, flow rate = 1.0 mL/min, λ = 254 nm, t<sub>R</sub> = 4.10 min (major) and t<sub>R</sub> = 4.50 min (minor), e.r. = 92:8.

**(R)-2-(3-fluorophenyl)-4,5-dimethyl-3,6-dihydro-2H-pyran (3c)**

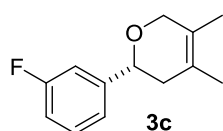

Aldehyde **1c** (12.4 mg, 0.1 mmol, 1.0 equiv) and diene **2a** (16.4 mg, 0.2 mmol, 2.0 equiv) were added to a mixture of catalyst **4c** (1 mol%) and 5 Å molecular sieves (21 mg) in MeCy (0.3 mL) at -78 °C, then the reaction mixture was stirred at -20 °C for 24 h. **3c** was obtained as a colorless oil (19.5 mg, 0.0945 mmol, 94.5%).

**<sup>1</sup>H NMR** (500 MHz, CDCl<sub>3</sub>): δ 7.30 (dt, *J* = 7.9, 2.0 Hz, 1H), 7.14–7.09 (m, 2H), 6.95 (ddt, *J* = 8.9, 2.5, 0.5 Hz, 1H), 4.54 (dd, *J* = 10.6, 3.8 Hz, 1H), 4.20 (td, *J* = 15.6, 1.1 Hz, 1H), 4.10 (d,

$J = 15.5$  Hz, 1H), 2.29–2.22 (m, 1H), 2.09 (d,  $J = 16.6$  Hz, 1H), 1.69 (br s, 3H), 1.59 (br s, 3H).

$^{13}\text{C}$  NMR (126 MHz,  $\text{CDCl}_3$ ):  $\delta$  164.0, 162.1, 145.54, 145.49, 129.96, 129.90, 124.7, 123.7, 121.46, 121.45, 114.4, 114.2, 113.0, 112.8, 75.71, 75.70, 70.4, 38.6, 18.5, 14.0.

HRMS (ESI+) ( $m/z$ ): calculated for  $\text{C}_{13}\text{H}_{15}\text{O}_1\text{F}_1\text{Na}_1$   $[\text{M}+\text{Na}]^+$ : 229.0999; found: 229.1001.

$[\alpha]_D^{20}$ : +184.0 ( $c = 0.50$ ,  $\text{CHCl}_3$ ).

**HPLC**: The enantiomeric ratio was measured by HPLC analysis using Chiralpak IA-3, i.D. 4.6 mm. Heptane/ $i$ PrOH = 99.5:0.5, flow rate = 1.0 mL/min,  $\lambda = 220$  nm,  $t_R = 4.52$  min (major) and  $t_R = 4.92$  min (minor), e.r. = 98:2.

#### (*R*)-2-(4-fluorophenyl)-4,5-dimethyl-3,6-dihydro-2*H*-pyran (**3d**)

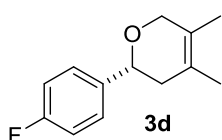

Aldehyde **1d** (12.4 mg, 0.1 mmol, 1.0 equiv) and diene **2a** (16.4 mg, 0.2 mmol, 2.0 equiv) were added to a mixture of catalyst **4c** (1 mol%) and 5 Å molecular sieves (21 mg) in MeCy (0.3 mL) at  $-78$  °C, then the reaction mixture was stirred at  $-20$  °C for 24 h. **3d** was obtained as a colorless oil (16 mg, 0.089 mmol, 89%).

$^1\text{H}$  NMR (500 MHz,  $\text{CDCl}_3$ ):  $\delta$  7.34 (dt,  $J = 5.6, 2.0$  Hz, 2H), 7.02 (tt,  $J = 6.8, 2.9$  Hz, 2H), 4.52 (dd,  $J = 10.6, 3.5$  Hz, 1H), 4.20 (td,  $J = 15.5, 1.1$  Hz, 1H), 4.10 (d,  $J = 15.5$  Hz, 1H), 2.30–2.24 (m, 1H), 2.07 (d,  $J = 16.7$  Hz, 1H), 1.69 (br s, 3H), 1.59 (br s, 3H).

$^{13}\text{C}$  NMR (126 MHz,  $\text{CDCl}_3$ ):  $\delta$  163.2, 161.3, 138.63, 138.60, 127.7, 127.6, 124.7, 123.8, 115.4, 115.2, 75.8, 70.4, 38.7, 18.5, 14.0.

HRMS (ESI+) ( $m/z$ ): calculated for  $\text{C}_{13}\text{H}_{15}\text{O}_1\text{F}_1\text{Na}_1$   $[\text{M}+\text{Na}]^+$ : 229.0999; found: 229.1001.

$[\alpha]_D^{20}$ : +164.0 ( $c = 0.50$ ,  $\text{CHCl}_3$ ).

**HPLC**: The enantiomeric ratio was measured by HPLC analysis using Chiralpak IA-3, i.D. 4.6 mm. Heptane/ $i$ PrOH = 99.5:0.5, flow rate = 1.0 mL/min,  $\lambda = 220$  nm,  $t_R = 4.95$  min (major) and  $t_R = 5.46$  min (minor), e.r. = 97:3.

**(R)-4,5-dimethyl-2-(*p*-tolyl)-3,6-dihydro-2H-pyran (3e)**

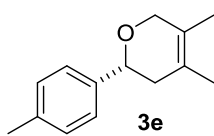

Aldehyde **1e** (12.0 mg, 0.1 mmol, 1.0 equiv) and diene **2a** (41 mg, 0.5 mmol, 5.0 equiv) were added to a mixture of catalyst **4c** (3 mol%) and 5 Å molecular sieves (21 mg) in MeCy (0.3 mL) at  $-78\text{ }^{\circ}\text{C}$ , then the reaction mixture was stirred at  $-60\text{ }^{\circ}\text{C}$  for 6 days. **3e** was obtained as a colorless oil (18.9 mg, 0.093 mmol, 93%).

**$^1\text{H}$  NMR** (500 MHz,  $\text{CD}_2\text{Cl}_2$ ):  $\delta$  7.23 (d,  $J = 8.0$  Hz, 2H), 7.15 (d,  $J = 8.0$  Hz, 2H), 4.48 (dd,  $J = 10.6, 3.5$  Hz, 1H), 4.17 (d,  $J = 15.5$  Hz, 1H), 4.05 (d,  $J = 15.5$  Hz, 1H), 2.33 (s, 3H), 2.26–2.21 (m, 1H), 2.06 (d,  $J = 16.7$  Hz, 1H), 1.69 (br s, 3H), 1.59 (br s, 3H).

**$^{13}\text{C}$  NMR** (126 MHz,  $\text{CD}_2\text{Cl}_2$ ):  $\delta$  140.4, 137.3, 129.2, 126.1, 124.9, 124.2, 76.4, 70.6, 38.9, 21.2, 18.5, 13.9.

**HRMS** (ESI+) ( $m/z$ ): calculated for  $\text{C}_{14}\text{H}_{18}\text{O}_1\text{Na}_1$   $[\text{M}+\text{Na}]^+$ : 225.1250; found: 225.1250.

$[\alpha]_D^{20}$ : +184.0 ( $c = 0.50$ ,  $\text{CHCl}_3$ ).

**HPLC**: The enantiomeric ratio was measured by HPLC analysis using Chiralpak IA-3, i.D. 4.6 mm. Heptane/ $i$ PrOH = 99.5:0.5, flow rate = 1.0 mL/min,  $\lambda = 254$  nm,  $t_R = 5.37$  min (major) and  $t_R = 6.16$  min (minor), e.r. = 95:5.

**(R)-2-(4-bromophenyl)-4,5-dimethyl-3,6-dihydro-2H-pyran (3f)**

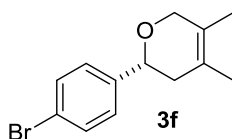

Aldehyde **1f** (18.5 mg, 0.1 mmol, 1.0 equiv) and diene **2a** (82 mg, 1.0 mmol, 10.0 equiv) were added to a mixture of catalyst **4c** (3 mol%) and 5 Å molecular sieves (21 mg) in MeCy (0.3 mL) at  $-78\text{ }^{\circ}\text{C}$ , then the reaction mixture was stirred at  $-60\text{ }^{\circ}\text{C}$  for 6 days. **3f** was obtained as a colorless oil (9.6 mg, 0.036 mmol, 36%).

**$^1\text{H}$  NMR** (500 MHz,  $\text{CDCl}_3$ ):  $\delta$  7.47 (dt,  $J = 8.5, 2.4$  Hz, 2H), 7.25 (dt,  $J = 8.4, 1.5$  Hz, 2H), 4.50 (dd,  $J = 10.6, 3.5$  Hz, 1H), 4.19 (td,  $J = 15.6, 1.1$  Hz, 1H), 4.09 (d,  $J = 15.6$  Hz, 1H), 2.26–2.20 (m, 1H), 2.07 (d,  $J = 16.7$  Hz, 1H), 1.68 (br s, 3H), 1.59 (br s, 3H).

**$^{13}\text{C}$  NMR** (126 MHz,  $\text{CDCl}_3$ ):  $\delta$  141.9, 131.6, 127.7, 124.7, 123.7, 121.2, 75.7, 70.4, 38.6, 18.5, 14.0.

**HRMS** (ESI+) ( $m/z$ ): calculated for  $C_{13}H_{16}O_1Br_1$   $[M+H]^+$ : 267.0379; found: 267.0380.

$[\alpha]_D^{20}$ : +154.0 ( $c = 0.50$ ,  $CHCl_3$ ).

**HPLC**: The enantiomeric ratio was measured by HPLC analysis using Chiralpak IA-3, i.D. 4.6 mm. Heptane/ $i$ PrOH = 99.5:0.5, flow rate = 1.0 mL/min,  $\lambda = 254$  nm,  $t_R = 5.57$  min (major) and  $t_R = 6.17$  min (minor), e.r. = 95:5.

**(R)-4,5-dimethyl-2-(thiophen-2-yl)-3,6-dihydro-2H-pyran (3g)**

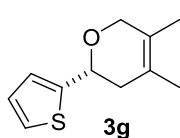

Aldehyde **1g** (11.2 mg, 0.1 mmol, 1.0 equiv) and diene **2a** (16.4 mg, 0.2 mmol, 2.0 equiv) were added to a mixture of catalyst **4c** (1 mol%) and 5 Å molecular sieves (21 mg) in MeCy (0.3 mL) at  $-78$  °C, then the reaction mixture was stirred at  $-10$  °C for 72 h. **3g** was obtained as a colorless oil (9.3 mg, 0.048 mmol, 48%).

**$^1H$  NMR** (500 MHz,  $CD_2Cl_2$ ):  $\delta$  7.25 (dd,  $J = 4.5, 1$  Hz, 1H), 6.98–6.96 (m, 2H), 4.49 (dd,  $J = 10.0, 3.7$  Hz, 1H), 4.17 (d,  $J = 15.6$  Hz, 1H), 4.02 (d,  $J = 15.5$  Hz, 1H), 2.42–2.36 (m, 1H), 2.21 (d,  $J = 16.6$  Hz, 1H), 1.70 (br s, 3H), 1.57 (br s, 3H).

**$^{13}C$  NMR** (126 MHz,  $CD_2Cl_2$ ):  $\delta$  146.6, 126.8, 124.9, 124.8, 124.0, 123.6, 72.4, 70.2, 38.6, 18.4, 13.9.

**HRMS** (ESI+) ( $m/z$ ): calculated for  $C_{11}H_{14}O_1S_1Na_1$   $[M+Na]^+$ : 217.0658; found: 217.0659.

$[\alpha]_D^{20}$ : +64.0 ( $c = 0.50$ ,  $CHCl_3$ ).

**HPLC**: The enantiomeric ratio was measured by HPLC analysis using Chiralpak IA-3, i.D. 4.6 mm. Heptane/ $i$ PrOH = 99.5:0.5, flow rate = 1.0 mL/min,  $\lambda = 220$  nm,  $t_R = 5.52$  min (major) and  $t_R = 5.96$  min (minor), e.r. = 99.7:0.3.

**(R)-2-isopropyl-4,5-dimethyl-3,6-dihydro-2H-pyran (3h)**

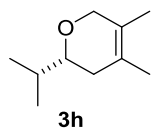

Aldehyde **1h** (22 mg, 0.3 mmol, 1.0 equiv) and diene **2a** (0.25 g, 3.0 mmol, 10.0 equiv) were added to a mixture of catalyst **4d** (1 mol%) and 5 Å molecular sieves (70 mg) in MeCy (1.0 mL) at  $-78$  °C, then the reaction mixture was

stirred at  $-10\text{ }^{\circ}\text{C}$  for 70 h. **3h** was obtained as a colorless oil (38 mg, 0.25 mmol, 83%).

**$^1\text{H}$  NMR** (500 MHz,  $\text{CD}_2\text{Cl}_2$ ):  $\delta$  3.92–3.77 (m, 2H), 3.03 (ddd,  $J = 10.4, 6.8, 3.4$  Hz, 1H), 1.90–1.82 (m, 1H), 1.69 (d,  $J = 16.5$  Hz, 1H), 1.61–1.52 (m, 4H), 1.44 (dt,  $J = 2.3, 1.2$  Hz, 3H), 0.83 (dd,  $J = 26.5, 6.8$  Hz, 6H).

**$^{13}\text{C}$  NMR** (126 MHz,  $\text{CD}_2\text{Cl}_2$ ):  $\delta$  124.4, 123.5, 79.3, 70.0, 33.7, 32.9, 18.4, 18.1, 17.9, 13.5.

**HRMS** (ESI+) ( $m/z$ ): calculated for  $\text{C}_{10}\text{H}_{19}\text{O}_1$   $[\text{M}+\text{H}]^+$ : 155.1430; found: 155.1432.

$[\alpha]_D^{25}$ : +163.2 ( $c = 0.32$ ,  $\text{CH}_2\text{Cl}_2$ ).

**GC**: The enantiomeric ratio was measured by GC analysis on a chiral column (Hydrodex-gamma-TBDAC column: 25.0 m; i.D. 0.25mm); FID; Temperature:  $220\text{ }^{\circ}\text{C}$  (injector),  $350\text{ }^{\circ}\text{C}$  (detector),  $65\text{ }^{\circ}\text{C}$  (25 min, iso) to  $220\text{ }^{\circ}\text{C}$  ( $8\text{ }^{\circ}\text{C}/\text{min}$ , 5 min iso); Gas:  $\text{H}_2$  (0.50 bar);  $t_R = 21.81$  min (minor) and  $t_R = 23.46$  min (major), e.r. = 97:3.

#### (S)-2-isobutyl-4,5-dimethyl-3,6-dihydro-2H-pyran (**3i**)

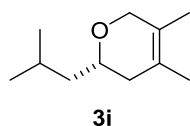

Aldehyde **1i** (26 mg, 0.3 mmol, 1.0 equiv) and diene **2a** (0.25 g, 3.0 mmol, 10.0 equiv) were added to a mixture of catalyst **4d** (1 mol%) and 5 Å molecular sieves (70 mg) in MeCy (1.0 mL) at  $-78\text{ }^{\circ}\text{C}$ , then the reaction mixture was stirred at  $-20\text{ }^{\circ}\text{C}$  for 70 h. **3i** was obtained as a colorless oil (46 mg, 0.27 mmol, 91%).

**$^1\text{H}$  NMR** (500 MHz,  $\text{CD}_2\text{Cl}_2$ ):  $\delta$  3.91–3.75 (m, 2H), 3.42 (dddd,  $J = 10.1, 8.2, 4.8, 3.6$  Hz, 1H), 1.84–1.76 (m, 1H), 1.73–1.66 (m, 2H), 1.54 (s, 3H), 1.44 (s, 3H), 1.37 (ddd,  $J = 14.1, 8.2, 6.2$  Hz, 1H), 1.14 (ddd,  $J = 13.7, 7.9, 4.8$  Hz, 1H), 0.82 (dd,  $J = 6.7, 2.0$  Hz, 6H).

**$^{13}\text{C}$  NMR** (126 MHz,  $\text{CD}_2\text{Cl}_2$ ):  $\delta$  124.6, 123.7, 72.5, 69.7, 45.2, 37.3, 24.6, 23.1, 22.4, 18.2, 13.7.

**HRMS** (EI) ( $m/z$ ): calculated for  $\text{C}_{11}\text{H}_{20}\text{O}_1$   $[\text{M}]$ : 168.1509; found: 168.1510.

$[\alpha]_D^{25}$ : +64.4 ( $c = 0.30$ ,  $\text{CH}_2\text{Cl}_2$ ).

**GC**: The enantiomeric ratio was measured by GC analysis on a chiral column (Cyclodextrin-H column: 25.0 m; i.D. 0.25mm); FID; Temperature:  $220\text{ }^{\circ}\text{C}$  (injector),  $350\text{ }^{\circ}\text{C}$  (detector),  $75\text{ }^{\circ}\text{C}$  (iso); Gas:  $\text{H}_2$  (0.40 bar);  $t_R = 20.68$  min (minor) and  $t_R = 21.55$  min (major), e.r. = 94:6.

**(S)-2-butyl-4,5-dimethyl-3,6-dihydro-2H-pyran (3j)**

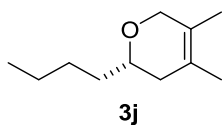

Aldehyde **1j** (26 mg, 0.3 mmol, 1.0 equiv) and diene **2a** (0.25 g, 3.0 mmol, 10.0 equiv) were added to a mixture of catalyst **4d** (1 mol%) and 5 Å molecular sieves (70 mg) in MeCy (1.0 mL) at  $-78\text{ }^{\circ}\text{C}$ , then the reaction mixture was stirred at  $-20\text{ }^{\circ}\text{C}$  for 48 h. **3j** was obtained as a colorless oil (44 mg, 0.26 mmol, 87%).

**$^1\text{H}$  NMR** (500 MHz,  $\text{CD}_2\text{Cl}_2$ ):  $\delta$  3.91–3.76 (m, 2H), 3.33 (dddd,  $J = 10.4, 7.4, 5.0, 3.6$  Hz, 1H), 1.86–1.76 (m, 1H), 1.71 (d,  $J = 16.5$  Hz, 1H), 1.54 (s, 3H), 1.44 (s, 3H), 1.38–1.17 (m, 6H), 0.82 (t,  $J = 7.1$  Hz, 3H).

**$^{13}\text{C}$  NMR** (126 MHz,  $\text{CD}_2\text{Cl}_2$ ):  $\delta$  124.4, 123.4, 74.2, 69.6, 36.7, 35.6, 27.7, 22.8, 18.0, 13.8, 13.5.

**HRMS** (EI) ( $m/z$ ): calculated for  $\text{C}_{11}\text{H}_{20}\text{O}$  [ $\text{M}$ ]: 168.1509; found: 168.1508.

$[\alpha]_D^{25}$ : +66.1 ( $c = 0.36$ ,  $\text{CH}_2\text{Cl}_2$ ).

**GC**: The enantiomeric ratio was measured by GC analysis on a chiral column (Cyclodextrin-H column: 25.0 m; i.D. 0.25mm); FID; Temperature:  $230\text{ }^{\circ}\text{C}$  (injector),  $350\text{ }^{\circ}\text{C}$  (detector),  $115\text{ }^{\circ}\text{C}$  (10 min, iso) to  $170\text{ }^{\circ}\text{C}$  ( $8\text{ }^{\circ}\text{C}/\text{min}$ , 3 min iso); Gas:  $\text{H}_2$  (0.50 bar);  $t_R = 4.21$  min (minor) and  $t_R = 4.35$  min (major), e.r. = 97:3.

**(S)-4,5-dimethyl-2-phenethyl-3,6-dihydro-2H-pyran (3k)**

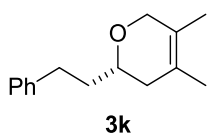

Aldehyde **1k** (40 mg, 0.3 mmol, 1.0 equiv) and diene **2a** (0.25 g, 3.0 mmol, 10.0 equiv) were added to a mixture of catalyst **4d** (1 mol%) and 5 Å molecular sieves (70 mg) in MeCy (1.0 mL) at  $-78\text{ }^{\circ}\text{C}$ , then the reaction mixture was stirred at  $-10\text{ }^{\circ}\text{C}$  for 48 h. **3k** was obtained as a colorless oil (47 mg, 0.22 mmol, 73%).

**$^1\text{H}$  NMR** (500 MHz,  $\text{CD}_2\text{Cl}_2$ ):  $\delta$  7.23–7.03 (m, 5H), 3.94–3.77 (m, 2H), 3.34 (dddd,  $J = 10.3, 8.0, 4.6, 3.5$  Hz, 1H), 2.68 (ddd,  $J = 13.7, 9.8, 5.5$  Hz, 1H), 2.58 (ddd,  $J = 13.7, 9.6, 6.9$  Hz, 1H), 1.91–1.83 (m, 1H), 1.77–1.61 (m, 3H), 1.54 (s, 3H), 1.44 (s, 3H).

**$^{13}\text{C}$  NMR** (126 MHz,  $\text{CD}_2\text{Cl}_2$ ):  $\delta$  142.5, 128.4, 128.2, 125.6, 124.4, 123.4, 73.2, 69.6, 37.5, 36.6, 31.7, 18.0, 13.5.

**HRMS** (EI) ( $m/z$ ): calculated for  $C_{15}H_{20}O_1$  [M]: 216.1509; found: 216.1511.

$[\alpha]_D^{25}$ : +80.2 ( $c = 0.34$ ,  $CH_2Cl_2$ ).

**GC**: The enantiomeric ratio was measured by GC analysis on a chiral column (Cyclodextrin-H column: 25.0 m; i.D. 0.25mm); FID; Temperature: 230 °C (injector), 350 °C (detector), 125 °C (45 min, iso) to 170 °C (8 °C/min, 3 min iso); Gas:  $H_2$  (0.60 bar);  $t_R = 37.79$  min (minor) and  $t_R = 38.98$  min (major), e.r. = 96:4.

**(R)-4,5-dimethyl-2-((R)-1-phenylethyl)-3,6-dihydro-2H-pyran (3l)**

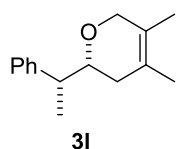

Aldehyde (**R**)-**1l** (13 mg, 0.1 mmol, 1.0 equiv) and diene **2a** (82 mg, 1.0 mmol, 10.0 equiv) were added to a mixture of catalyst **4d** (1 mol%) and 5 Å molecular sieves (23 mg) in MeCy (0.33 mL) at  $-78$  °C, then the reaction mixture was stirred at  $-20$  °C for 48 h. **3l** was obtained as a colorless oil (9 mg, 43 μmol, 43%).

**$^1H$  NMR** (500 MHz,  $CD_2Cl_2$ ):  $\delta$  7.32–7.25 (m, 2H, *H10*), 7.23–7.16 (m, 3H, *H11*, *H9*), 4.02 (br d,  $J = 15.4$  Hz, 1H, *H5eq*), 3.95 (d,  $J = 15.1$  Hz, 1H, *H5ax*), 3.51 (ddd,  $J = 10.5$ , 8.1, 3.3 Hz, 1H, *H1*), 2.72 (p,  $J = 8.1$ , 7.0 Hz, 1H, *H6*), 1.84 (dd,  $J = 17.5$ , 10.5 Hz, 1H, *H2ax*), 1.54–1.50 (m, 6H, *H12*, *H13*), 1.45 (d,  $J = 17.5$  Hz, 1H, *H2eq*), 1.33 (d,  $J = 6.9$  Hz, 3H, *H7*).

**$^{13}C$  NMR** (126 MHz,  $CD_2Cl_2$ ):  $\delta$  145.0 (*C8*), 128.6 (*C10*), 128.3 (*C9*), 126.6 (*C11*), 124.6 (*C3*), 124.0 (*C4*), 79.1 (*C1*), 70.4 (*C5*), 45.8 (*C6*), 35.3 (*C2*), 18.5 (*C7*), 18.4 (*C12*), 13.9 (*C13*).

**HRMS** (EI) ( $m/z$ ): calculated for  $C_{15}H_{20}O_1$  [M]: 216.1509; found: 216.1509.

$[\alpha]_D^{25}$ : +46.6 ( $c = 0.10$ ,  $CH_2Cl_2$ ).

**GC**: The enantiomeric ratio was measured by GC analysis on a chiral column (BGB 176 column: 30.0 m; i.D. 0.25mm); FID; Temperature: 220 °C (injector), 220 °C (detector), 150 °C (10 min, iso) to 220 °C (4 °C/min, 3 min iso); Gas:  $H_2$  (1.00 bar);  $t_R = 12.54$  min (major), 13.81 min (minor), d.r.<sub>syn:anti</sub> = 29:1, e.r.<sub>syn</sub> = >99.5:0.5.



**(R)-4,5-dimethyl-2-((S)-1-phenylethyl)-3,6-dihydro-2H-pyran (3m)**

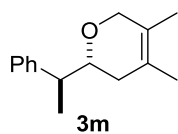

Aldehyde (*S*)-**11** (13 mg, 0.1 mmol, 1.0 equiv) and diene **2a** (82 mg, 1.0 mmol, 10.0 equiv) were added to a mixture of catalyst **4d** (1 mol%) and 5 Å molecular sieves (23 mg) in MeCy (0.33 mL) at  $-78\text{ }^{\circ}\text{C}$ , then the reaction mixture was stirred at  $-20\text{ }^{\circ}\text{C}$  for 48 h. **3m** was obtained as a colorless oil (10 mg, 48  $\mu\text{mol}$ , 48%).

**$^1\text{H}$  NMR** (500 MHz,  $\text{CD}_2\text{Cl}_2$ ):  $\delta$  7.30–7.25 (m, 2H, *H*10), 7.25–7.21 (m, 2H, *H*9), 7.21–7.16 (m, 1H, *H*11), 3.89 (dm,  $J = 15.5, 2.3, 1.1$  Hz, 1H, *H*5<sub>ax</sub>), 3.82 (d,  $J = 15.4$  Hz, 1H, *H*5<sub>eq</sub>), 3.61 (ddd,  $J = 10.6, 7.3, 3.4$  Hz, 1H, *H*1), 2.80 (p,  $J = 7.3$  Hz, 1H, *H*6), 1.97 (t,  $J = 16.8, 10.6$  Hz, 1H, *H*2<sub>ax</sub>), 1.84 (d,  $J = 16.8$  Hz, 1H, *H*2<sub>eq</sub>), 1.62 (dh,  $J = 2.1, 0.9$  Hz, 3H, *H*12), 1.50 (h,  $J = 2.3, 1.1$  Hz, 3H, *H*13), 1.24 (d,  $J = 7.2$  Hz, 3H, *H*7).

**$^{13}\text{C}$  NMR** (126 MHz,  $\text{CD}_2\text{Cl}_2$ ):  $\delta$  145.4 (*C*8), 128.42 (*C*10), 128.35 (*C*9), 126.4 (*C*11), 124.8 (*C*3), 123.8 (*C*4), 78.6 (*C*1), 70.4 (*C*5), 45.3 (*C*6), 34.7 (*C*2), 18.5 (*C*7), 18.0 (*C*12), 13.9 (*C*13).

**HRMS** (EI) ( $m/z$ ): calculated for  $\text{C}_{15}\text{H}_{20}\text{O}$  [*M*]: 216.1509; found: 216.1509.

$[\alpha]_D^{25}$ : +67.2 ( $c = 0.13$ ,  $\text{CH}_2\text{Cl}_2$ ).

**GC**: The enantiomeric ratio was measured by GC analysis on a chiral column (BGB 176 column: 30.0 m; i.D. 0.25mm); FID; Temperature:  $220\text{ }^{\circ}\text{C}$  (injector),  $220\text{ }^{\circ}\text{C}$  (detector),  $150\text{ }^{\circ}\text{C}$  (10 min, iso) to  $220\text{ }^{\circ}\text{C}$  ( $4\text{ }^{\circ}\text{C}/\text{min}$ , 3 min iso); Gas:  $\text{H}_2$  (1.00 bar);  $t_R = 12.54$  min (minor1), 12.87 min (minor2) and  $t_R = 13.56$  min (major), d.r.<sub>syn:anti</sub> = 1:31, e.r.<sub>anti</sub> = >99.5:0.5.

**(2R)-4,5-dimethyl-2-(1-phenylethyl)-3,6-dihydro-2H-pyran (3n)**

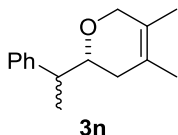

Aldehyde *rac*-**11** (40 mg, 0.3 mmol, 1.0 equiv) and diene **2a** (0.25 g, 3.0 mmol, 10.0 equiv) were added to a mixture of catalyst **4d** (1 mol%) and 5 Å molecular sieves (70 mg) in MeCy (1.0 mL) at  $-78\text{ }^{\circ}\text{C}$ , then the reaction mixture was stirred at  $-20\text{ }^{\circ}\text{C}$  for 48 h. **3n** was obtained as a colorless oil (29 mg, 0.14 mmol, 45%).

**$^1\text{H}$  NMR** (500 MHz,  $\text{CD}_2\text{Cl}_2$ ):  $\delta$  7.23–7.07 (m, 10H), 3.97–3.71 (m, 4H), 3.52 (ddd,  $J = 10.6, 7.3, 3.4$  Hz, 1H), 3.43 (ddd,  $J = 10.5, 8.1, 3.3$  Hz, 1H), 2.76–2.60 (m, 2H), 1.99–1.83 (m, 2H),

1.80–1.71 (m, 2H), 1.54 (s, 3H), 1.44–1.33 (m, 10H), 1.24 (d,  $J = 7.0$  Hz, 3H), 1.16 (d,  $J = 7.1$  Hz, 3H).

$^{13}\text{C}$  NMR (126 MHz,  $\text{CD}_2\text{Cl}_2$ ):  $\delta$  145.0, 144.6, 128.2, 128.0, 127.94, 127.90, 126.2, 126.0, 124.4, 124.2, 123.5, 123.4, 78.7, 78.2, 70.0, 45.4, 44.9, 34.9, 34.2, 18.12, 18.10, 18.0, 17.9, 17.6, 13.5, 13.4.

HRMS (EI) ( $m/z$ ): calculated for  $\text{C}_{15}\text{H}_{20}\text{O}_1$  [M]: 216.1509; found: 216.1508.

GC: The enantiomeric ratio was measured by GC analysis on a chiral column (BGB 176 column: 30.0 m; i.D. 0.25mm); FID; Temperature: 220 °C (injector), 220 °C (detector), 150 °C (10 min, iso) to 220 °C (4 °C/min, 3 min iso); Gas:  $\text{H}_2$  (1.00 bar);  $t_{\text{R}} = 12.54$  min (major 1), 12.88 min (minor 1) and  $t_{\text{R}} = 13.56$  min (major 2), 13.80 min (minor 2), d.r.<sub>syn:anti</sub> = 1:1.2, e.r.<sub>syn</sub> = 98:2, e.r.<sub>anti</sub> = 96:4.

#### (S)-4,5-dimethyl-2-nonyl-3,6-dihydro-2H-pyran (**3o**)

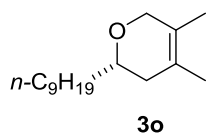

Aldehyde **1o** (47 mg, 0.3 mmol, 1.0 equiv) and diene **2a** (0.25 g, 3.0 mmol, 10.0 equiv) were added to a mixture of catalyst **4d** (1 mol%) and 5 Å molecular sieves (70 mg) in MeCy (1.0 mL) at  $-78$  °C, then the reaction mixture was stirred at  $-20$  °C for 48 h. **3o** was obtained as a colorless oil (67 mg, 0.28 mmol, 94%).

$^1\text{H}$  NMR (500 MHz,  $\text{CD}_2\text{Cl}_2$ ):  $\delta$  3.91–3.75 (m, 2H), 3.33 (dddd,  $J = 10.4, 7.2, 4.9, 3.4$  Hz, 1H), 1.86–1.76 (m, 1H), 1.71 (d,  $J = 16.5$  Hz, 1H), 1.54 (s, 3H), 1.45–1.39 (m, 4H), 1.36–1.29 (m, 2H), 1.24–1.16 (m, 13H), 0.80 (t,  $J = 6.9$  Hz, 3H).

$^{13}\text{C}$  NMR (126 MHz,  $\text{CD}_2\text{Cl}_2$ ):  $\delta$  126.3, 125.4, 76.1, 71.5, 38.6, 37.8, 33.8, 31.63, 31.55, 31.5, 31.2, 27.4, 24.6, 20.0, 15.8, 15.4.

HRMS (EI) ( $m/z$ ): calculated for  $\text{C}_{16}\text{H}_{30}\text{O}_1$  [M]: 238.2291; found: 238.2288.

$[\alpha]_{\text{D}}^{25}$ : +118.0 ( $c = 0.36$ ,  $\text{CH}_2\text{Cl}_2$ ).

GC: The enantiomeric ratio was measured by GC analysis on a chiral column (Cyclodextrin-H column: 25.0 m; i.D. 0.25mm); FID; Temperature: 220 °C (injector), 350 °C (detector), 130 °C (40 min, iso); Gas:  $\text{H}_2$  (0.50 bar);  $t_{\text{R}} = 34.49$  min (minor) and  $t_{\text{R}} = 35.43$  min (major), e.r. = 97:3.

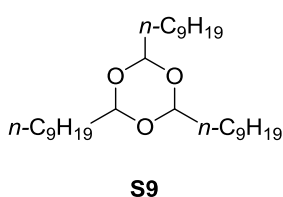

**2,4,6-trinonyl-1,3,5-trioxane (S9)**

A colorless solid.

$R_f$  0.40 (*n*-pentane/CH<sub>2</sub>Cl<sub>2</sub>, 4:1).

**<sup>1</sup>H NMR** (500 MHz, CDCl<sub>3</sub>): δ 4.83 (t, *J* = 5.3 Hz, 1H), 1.71–1.60 (m, 2H), 1.44–1.35 (m, 2H), 1.33–1.22 (m, 12H), 0.88 (t, *J* = 6.9 Hz, 3H).

**<sup>13</sup>C NMR** (126 MHz, CDCl<sub>3</sub>): δ 101.7, 34.4, 31.9, 29.52, 29.50, 29.4, 29.3, 23.6, 22.7, 14.1.

**HRMS** (ESI+) (*m/z*): calculated for C<sub>30</sub>H<sub>60</sub>O<sub>3</sub>Na<sub>1</sub> [M+Na]<sup>+</sup>: 491.4435; found: 491.4438.

**(S)-2-(6-bromohexyl)-4,5-dimethyl-3,6-dihydro-2H-pyran (3p)**

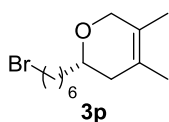

Aldehyde **1p** (58 mg, 0.3 mmol, 1.0 equiv) and diene **2a** (0.25 g, 3.0 mmol, 10.0 equiv) were added to a mixture of catalyst **4d** (1 mol%) and 5 Å molecular sieves (70 mg) in MeCy (1.0 mL) at –78 °C, then the reaction mixture was stirred at –20 °C for 48 h. **3p** was obtained as a colorless oil (66 mg, 0.24 mmol, 80%).

**<sup>1</sup>H NMR** (500 MHz, CD<sub>2</sub>Cl<sub>2</sub>): δ 3.88 (d, *J* = 15.4 Hz, 1H), 3.79 (d, *J* = 16.6 Hz, 1H), 3.38–3.23 (m, 3H), 1.85–1.68 (m, 4H), 1.54 (s, 3H), 1.46–1.38 (m, 4H), 1.38–1.31 (m, 4H), 1.29–1.21 (m, 3H).

**<sup>13</sup>C NMR** (126 MHz, CD<sub>2</sub>Cl<sub>2</sub>): δ 126.3, 125.3, 76.0, 71.6, 38.6, 37.6, 36.1, 34.7, 30.7, 30.0, 27.2, 20.0, 15.4.

**HRMS** (EI) (*m/z*): calculated for C<sub>13</sub>H<sub>23</sub>O<sub>1</sub>Br<sub>1</sub> [M]: 274.0927; found: 274.0929.

$[\alpha]_D^{25}$ : +85.8 (*c* = 0.50, CH<sub>2</sub>Cl<sub>2</sub>).

**GC**: The enantiomeric ratio was measured by GC analysis on a chiral column (Cyclodextrin-H column: 25.0 m; i.D. 0.25mm); FID; Temperature: 220 °C (injector), 350 °C (detector), 120 °C (120 min, iso); Gas: H<sub>2</sub> (0.50 bar); *t<sub>R</sub>* = 102.41 min (minor) and *t<sub>R</sub>* = 104.94 min (major), e.r. = 96:4.

**(S)-2-(7-(benzyloxy)heptyl)-4,5-dimethyl-3,6-dihydro-2H-pyran (3q)**

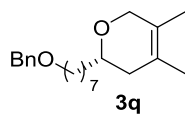

Aldehyde **1q** (70 mg, 0.3 mmol, 1.0 equiv) and diene **2a** (0.25 g, 3.0 mmol, 10.0 equiv) were added to a mixture of catalyst **4d** (1 mol%) and 5 Å molecular sieves (70 mg) in MeCy (1.0 mL) at  $-78\text{ }^{\circ}\text{C}$ , then the reaction mixture was stirred at  $-20\text{ }^{\circ}\text{C}$  for 48 h. **3q** was obtained as a colorless oil (79 mg, 0.25 mmol, 83%).

**$^1\text{H}$  NMR** (500 MHz,  $\text{CD}_2\text{Cl}_2$ ):  $\delta$  7.29–7.12 (m, 5H), 4.37 (s, 2H), 3.93–3.71 (m, 2H), 3.36 (t,  $J = 6.6\text{ Hz}$ , 2H), 3.31 (dddd,  $J = 10.5, 7.3, 3.6, 1.4\text{ Hz}$ , 1H), 1.85–1.74 (m, 1H), 1.73–1.66 (m, 1H), 1.53 (td,  $J = 2.0, 1.0\text{ Hz}$ , 3H), 1.50 (dt,  $J = 8.1, 6.4\text{ Hz}$ , 2H), 1.43 (dt,  $J = 2.5, 1.2\text{ Hz}$ , 4H), 1.33–1.17 (m, 9H).

**$^{13}\text{C}$  NMR** (126 MHz,  $\text{CD}_2\text{Cl}_2$ ):  $\delta$  139.1, 128.2, 127.5, 127.3, 125.4, 124.4, 123.5, 74.2, 72.7, 70.5, 69.6, 36.7, 35.9, 30.1, 29.8, 29.7, 29.4, 26.2, 25.5, 18.0, 13.5.

**HRMS** (ESI+) ( $m/z$ ): calculated for  $\text{C}_{21}\text{H}_{32}\text{O}_2\text{Na}_1$   $[\text{M}+\text{Na}]^+$ : 339.2294; found: 339.2296.

$[\alpha]_D^{25}$ : +69.9 ( $c = 0.50$ ,  $\text{CH}_2\text{Cl}_2$ ).

**HPLC**: The enantiomeric ratio was measured by HPLC analysis using Chiralpak IA-3, i.D. 4.6 mm. Heptane/ $i$ PrOH = 98:2, flow rate = 1.0 mL/min,  $\lambda = 210\text{ nm}$ ,  $t_R = 4.86\text{ min}$  (minor) and  $t_R = 5.63\text{ min}$  (major). e.r. = 95:5.

**(S)-2-(dec-9-en-1-yl)-4,5-dimethyl-3,6-dihydro-2H-pyran (3r)**

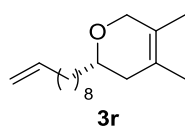

Aldehyde **1r** (52 mg, 0.3 mmol, 1.0 equiv) and diene **2a** (0.25 g, 3.0 mmol, 10.0 equiv) were added to a mixture of catalyst **4d** (1 mol%) and 5 Å molecular sieves (70 mg) in MeCy (1.0 mL) at  $-78\text{ }^{\circ}\text{C}$ , then the reaction mixture was stirred at  $-20\text{ }^{\circ}\text{C}$  for 48 h. **3r** was obtained as a colorless oil (68 mg, 0.27 mmol, 89%).

**$^1\text{H}$  NMR** (500 MHz,  $\text{CD}_2\text{Cl}_2$ ):  $\delta$  5.74 (ddt,  $J = 16.9, 10.1, 6.7\text{ Hz}$ , 1H), 4.98–4.76 (m, 2H), 3.94–3.72 (m, 2H), 3.33 (dddd,  $J = 10.3, 7.2, 4.9, 3.5\text{ Hz}$ , 1H), 1.98–1.93 (m, 2H), 1.87–1.76 (m, 1H), 1.71 (d,  $J = 16.3\text{ Hz}$ , 1H), 1.58–1.50 (m, 3H), 1.44 (s, 4H), 1.36–1.25 (m, 4H), 1.25–1.16 (m, 9H).

**<sup>13</sup>C NMR** (126 MHz, CD<sub>2</sub>Cl<sub>2</sub>): δ 139.3, 124.4, 123.5, 113.8, 74.2, 69.6, 36.7, 35.9, 33.8, 29.7, 29.6, 29.4, 29.1, 29.0, 25.5, 18.0, 13.5.

**HRMS** (ESI+) (*m/z*): calculated for C<sub>17</sub>H<sub>31</sub>O<sub>1</sub> [M+H]<sup>+</sup>: 251.2369; found: 251.2373.

[α]<sub>D</sub><sup>25</sup>: +59.5 (*c* = 0.26, CH<sub>2</sub>Cl<sub>2</sub>).

**GC**: The enantiomeric ratio was measured by GC analysis on a chiral column (Cyclodextrin-H column: 25.0 m; i.D. 0.25mm); FID; Temperature: 220 °C (injector), 350 °C (detector), 130 °C (60 min, iso); Gas: H<sub>2</sub> (0.50 bar); t<sub>R</sub> = 52.26 min (minor) and t<sub>R</sub> = 53.72 min (major), e.r. = 97:3.

**(3*S*,5*S*,8*R*,9*S*,10*S*,13*R*,14*S*,17*R*)-10,13-dimethyl-17-((*R*)-5-methylhexan-2-yl)hexadecahydro-1*H*-cyclopenta[*a*]phenanthren-3-yl 9-((*S*)-4,5-dimethyl-3,6-dihydro-2*H*-pyran-2-yl)nonanoate (3s)**

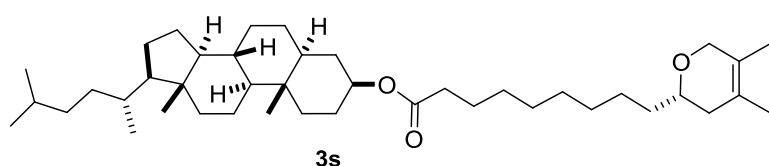

Aldehyde **1s** (55.7 mg, 0.1 mmol, 1.0 equiv) and diene **2a** (82 mg, 1.0 mmol, 10.0 equiv) were added to a mixture of catalyst

**4d** (1 mol%) and 5 Å molecular sieves (21 mg) in MeCy (0.3 mL) at −78 °C, then the reaction mixture was stirred at −10 °C for 72 h. **3s** was obtained as a colorless solid (52 mg, 0.081 mmol, 81%).

**<sup>1</sup>H NMR** (500 MHz, CD<sub>2</sub>Cl<sub>2</sub>): δ 4.66 (hept, *J* = 5.0 Hz, 1H), 3.96 (td, *J* = 15.4, 0.9 Hz, 1H), 3.87 (d, *J* = 15.4 Hz, 1H), 3.43–3.38 (m, 1H), 2.23 (t, *J* = 7.4 Hz, 2H), 1.97 (td, *J* = 12.6, 3.3 Hz, 1H), 1.92–1.60 (m, 10H), 1.60–1.46 (m, 10.8H), 1.44–0.96 (m, 30.9H), 0.91 (d, *J* = 6.5 Hz, 3H), 0.86 (dd, *J* = 6.6, 2.0 Hz, 6H), 0.83 (s, 3H), 0.69–0.61 (m, 4H).

**<sup>13</sup>C NMR** (126 MHz, CD<sub>2</sub>Cl<sub>2</sub>): δ 173.5, 124.8, 123.9, 74.6, 73.7, 70.1, 56.9, 56.8, 54.7, 45.1, 43.0, 40.5, 39.9, 37.21, 37.19, 36.6, 36.32, 36.26, 35.93, 35.88, 35.1, 34.5, 32.5, 30.1, 29.9, 29.7, 29.5, 29.1, 28.6, 28.5, 28.0, 25.9, 25.5, 24.6, 24.3, 23.0, 22.7, 21.6, 18.9, 18.5, 14.0, 12.4, 12.3.

**HRMS** (ESI+) (*m/z*): calculated for C<sub>43</sub>H<sub>74</sub>O<sub>3</sub>Na<sub>1</sub> [M+Na]<sup>+</sup>: 661.5530; found: 661.5540.

[α]<sub>D</sub><sup>20</sup>: +32.0 (*c* = 0.50, CHCl<sub>3</sub>).

**HPLC:** The diastereomeric ratio was measured by Heart-Cut-HPLC analysis using Chiralpak OD-3, i.D. 4.6 mm. Heptane/*i*PrOH = 99:1, flow rate = 1.0 mL/min,  $\lambda$  = 204 nm,  $t_R$  = 3.96 min (major) and  $t_R$  = 4.66 min (minor), d.r. = 19:1.

**(R)-4-methyl-2-phenyl-3,6-dihydro-2H-pyran (3t)**

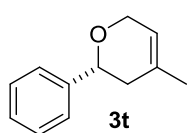

Aldehyde **1a** (10.6 mg, 0.1 mmol, 1.0 equiv) and diene **2b** (13.6 mg, 0.2 mmol, 2.0 equiv) were added to a mixture of catalyst **4c** (1 mol%) and 5 Å molecular sieves (21 mg) in MeCy (0.3 mL) at  $-78$  °C, then the reaction mixture was stirred at  $-20$  °C for 24 h. **3t** was obtained as a colorless oil (17 mg, 0.097 mmol, 97%).

**$^1\text{H}$  NMR** (500 MHz,  $\text{CD}_2\text{Cl}_2$ ):  $\delta$  7.38–7.33 (m, 4H), 7.27 (tt,  $J$  = 8.6, 1.8 Hz, 1H), 5.51 (br s, 1H), 4.51 (dd,  $J$  = 10.4, 3.5 Hz, 1H), 4.29–4.28 (m, 2H), 2.28–2.22 (m, 1H), 2.10 (d,  $J$  = 16.8 Hz, 1H), 1.75 (br s, 3H).

**$^{13}\text{C}$  NMR** (126 MHz,  $\text{CD}_2\text{Cl}_2$ ):  $\delta$  143.4, 132.5, 128.6, 127.7, 126.2, 120.2, 76.1, 66.8, 38.1, 23.0.

**HRMS** (ESI+) ( $m/z$ ): calculated for  $\text{C}_{12}\text{H}_{14}\text{O}_1\text{Na}_1$  [ $\text{M}+\text{Na}$ ] $^+$ : 197.0937; found: 197.0937.

$[\alpha]_D^{20}$ : +161.0 ( $c$  = 0.50,  $\text{CHCl}_3$ ).

**GC:** The enantiomeric ratio was measured by GC analysis on a chiral column (Hydrodex-gamma-TBDAC column: 25.0 m; i.D. 0.25mm); FID; Temperature:  $220$  °C (injector),  $350$  °C (detector),  $115$  °C (35 min, iso); Gas:  $\text{H}_2$  (0.53 bar);  $t_R$  = 18.86 min (major) and  $t_R$  = 19.87 min (minor), e.r. = 98:2.

**(S)-2,4,5-trimethyl-3,6-dihydro-2H-pyran (3u)**

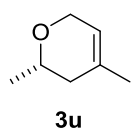

Acetic acid (0.05 mmol, 0.2 M in MeCy), aldehyde **1u** (0.1 mmol, 1.3 M in MeCy), and diene **2b** (0.1 g, 1.5 mmol) were added to a mixture of catalyst **4d** (2 mol%) and 5 Å molecular sieves (23 mg) at  $-78$  °C. The reaction mixture was stirred at  $-20$  °C for 72 h. **3u** was obtained in 45% yield, determined by  $^1\text{H}$  NMR analysis using internal standard because of the low boiling point of the compound<sup>33</sup>.

**HRMS** (EI) ( $m/z$ ): calculated for  $C_7H_{12}O_1$  [M]: 112.0883; found: 112.0885.

**GC**: The enantiomeric ratio was measured by GC analysis on a chiral column (Ivadex-1 column: 25.0 m; i.D. 0.25mm); FID; Temperature: 220 °C (injector), 220 °C (detector), 50 °C (20 min, iso); Gas: He (1.35 bar);  $t_R$  = 4.29 min (major) and  $t_R$  = 4.74 min (minor), e.r. = 90:10.

**(S)-2-isobutyl-4-methyl-3,6-dihydro-2H-pyran (3v)**

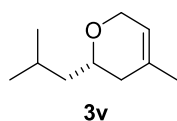

Aldehyde **1i** (26 mg, 0.3 mmol, 1.0 equiv) and diene **2b** (0.31 g, 4.5 mmol, 15 equiv) were added to a mixture of catalyst **4d** (1 mol%) and 5 Å molecular sieves (70 mg) in MeCy (1.0 mL) at –78 °C, then the reaction mixture was stirred at –20 °C for 70 h. **3v** was obtained as a colorless oil (37 mg, 0.24 mmol, 81%).

**$^1H$  NMR** (500 MHz,  $CD_2Cl_2$ ):  $\delta$  5.34–5.29 (m, 1H), 4.02–3.95 (m, 2H), 3.42 (dddd,  $J$  = 9.9, 8.3, 4.7, 3.7 Hz, 1H), 1.84–1.76 (m, 1H), 1.75–1.66 (m, 2H), 1.60 (s, 3H), 1.39 (ddd,  $J$  = 14.3, 8.3, 6.1 Hz, 1H), 1.15 (ddd,  $J$  = 13.7, 8.1, 4.8 Hz, 1H), 0.82 (dd,  $J$  = 6.7, 2.8 Hz, 6H).

**$^{13}C$  NMR** (126 MHz,  $CD_2Cl_2$ )  $\delta$  132.0, 119.7, 71.9, 65.7, 45.1, 36.3, 24.4, 22.9, 22.7, 22.2.

**HRMS** (EI) ( $m/z$ ): calculated for  $C_{10}H_{18}O_1$  [M]: 154.1352; found: 154.1351.

$[\alpha]_D^{25}$ : +31.3 ( $c$  = 0.33,  $CH_2Cl_2$ ).

**GC**: The enantiomeric ratio was measured by GC analysis on a chiral column (Cyclodextrin-H column: 25.0 m; i.D. 0.25mm); FID; Temperature: 230 °C (injector), 350 °C (detector), 90 °C (15 min, iso) to 170 °C (8 °C/min, 3 min iso); Gas:  $H_2$  (0.40 bar);  $t_R$  = 6.06 min (minor) and  $t_R$  = 7.22 min (major), e.r. = 94:6.

**(R)-4,6,6-trimethyl-2-phenyl-3,6-dihydro-2H-pyran (3w)**

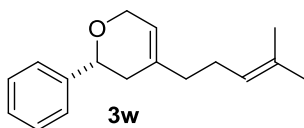

Aldehyde **1a** (10.6 mg, 0.1 mmol, 1.0 equiv) and diene **2c** (41 mg, 0.3 mmol, 3.0 equiv) were added to a mixture of catalyst **4c** (2 mol%) and 5 Å molecular sieves (21 mg) in MeCy (0.3 mL) at –

78 °C, then the reaction mixture was stirred at –40 °C for 4 days. **3w** was obtained as a colorless oil (8.7 mg, 0.036 mmol, 36%).

**<sup>1</sup>H NMR** (500 MHz, CD<sub>2</sub>Cl<sub>2</sub>): δ 7.38–7.32 (m, 4H), 7.27 (tt, *J* = 6.2, 1.8 Hz, 1H), 5.51 (q, *J* = 1.2 Hz, 1H), 5.13 (ddt, *J* = 8.2, 2.8, 1.4 Hz, 1H), 4.50 (dd, *J* = 10.4, 3.5 Hz, 1H), 4.31 (p, *J* = 1.7 Hz, 2H), 2.28–2.22 (m, 1H), 2.15–2.11 (m, 3H), 2.07–2.04 (m, 2H), 1.69 (d, *J* = 0.9 Hz, 3H), 1.62 (br s, 3H).

**<sup>13</sup>C NMR** (126 MHz, CD<sub>2</sub>Cl<sub>2</sub>): δ 143.5, 136.2, 132.1, 128.7, 128.6, 127.6, 126.2, 124.3, 119.9, 76.1, 66.8, 37.3, 36.7, 26.4, 25.8, 17.8.

**HRMS** (ESI+) (*m/z*): calculated for C<sub>17</sub>H<sub>22</sub>O<sub>1</sub>Na<sub>1</sub> [*M*+Na]<sup>+</sup>: 265.1563; found: 265.1562.

[α]<sub>D</sub><sup>20</sup>: +36.0 (*c* = 0.45, CHCl<sub>3</sub>).

**GC**: The enantiomeric ratio was measured by GC analysis on a chiral column (Hydrodex-gamma-TBDAC column: 25.0 m; i.D. 0.25mm); FID; Temperature: 220 °C (injector), 350 °C (detector), 130 °C (140 min, iso); Gas: H<sub>2</sub> (0.50 bar); *t*<sub>R</sub> = 114.52 min (major) and *t*<sub>R</sub> = 117.41 min (minor), e.r. = 96:4.

#### (*R*)-4,6,6-trimethyl-2-phenyl-3,6-dihydro-2*H*-pyran (**3x**)

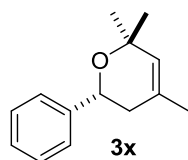

Aldehyde **1a** (10.6 mg, 0.1 mmol, 1.0 equiv) and diene **2d** (48 mg, 0.5 mmol, 5.0 equiv) were added to a mixture of catalyst **4d** (2 mol%) and 5 Å molecular sieves (700 mg) in MeCy (10.0 mL) at –78 °C, then the reaction mixture was stirred at –45 °C for 48 h. **3x** was obtained as a colorless oil (16.5 mg, 0.082 mmol, 82%).

**<sup>1</sup>H NMR** (500 MHz, CD<sub>2</sub>Cl<sub>2</sub>): δ 7.40–7.38 (m, 2H), 7.33 (dt, *J* = 7.4, 2.0 Hz, 2H), 7.26 (tt, *J* = 6.6, 1.4 Hz, 1H), 5.42 (t, *J* = 1.0 Hz, 1H), 4.69 (dd, *J* = 10.7, 3.3 Hz, 1H), 2.18–2.11 (m, 1H), 2.01 (dd, *J* = 16.7, 3.3 Hz, 1H), 1.72 (br s, 3H), 1.29 (d, *J* = 1.6 Hz, 6H).

**<sup>13</sup>C NMR** (126 MHz, CD<sub>2</sub>Cl<sub>2</sub>): δ 143.9, 130.6, 129.1, 128.6, 127.5, 126.5, 73.7, 71.1, 37.8, 30.1, 26.2, 23.1.

**HRMS** (ESI+) (*m/z*): calculated for C<sub>14</sub>H<sub>18</sub>O<sub>1</sub>Na<sub>1</sub> [*M*+Na]<sup>+</sup>: 225.1250; found: 225.1248.

[α]<sub>D</sub><sup>20</sup>: +80.0 (*c* = 0.50, CHCl<sub>3</sub>).

**GC**: The enantiomeric ratio was measured by GC analysis on a chiral column (Cyclodextrin-H column: 25.0 m; i.D. 0.25mm); FID; Temperature: 220 °C (injector), 350 °C (detector), 90 °C



(60 min, iso); Gas: H<sub>2</sub> (0.50 bar); t<sub>R</sub> = 41.98 min (minor) and t<sub>R</sub> = 45.20 min (major), e.r. = 96:4.

**(R)-2-(4-bromophenyl)-4,6,6-trimethyl-3,6-dihydro-2H-pyran (3y)**

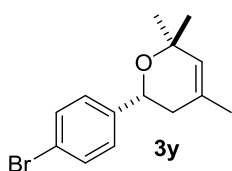

Aldehyde **1f** (18.5 mg, 0.1 mmol, 1.0 equiv) and diene **2d** (48 mg, 0.5 mmol, 5.0 equiv) were added to a mixture of catalyst **4d** (2 mol%) and 5 Å molecular sieves (700 mg) in MeCy (10.0 mL) at −78 °C, then the reaction mixture was stirred at −45 °C for 4 days. The titled compound **3y** was obtained as a colorless oil (23.4 mg, 0.083 mmol, 83%).

**<sup>1</sup>H NMR** (500 MHz, CD<sub>2</sub>Cl<sub>2</sub>): δ 7.47 (td, *J* = 8.5, 2.5 Hz, 2H), 7.29 (td, *J* = 8.3, 2.2 Hz, 2H), 5.41 (p, *J* = 1.1 Hz, 1H), 4.66 (dd, *J* = 10.5, 3.6 Hz, 1H), 2.11–2.05 (m, 1H), 2.00 (dd, *J* = 16.7, 3.6 Hz, 1H), 1.71 (br s, 3H), 1.28 (d, *J* = 2.0 Hz, 6H).

**<sup>13</sup>C NMR** (126 MHz, CD<sub>2</sub>Cl<sub>2</sub>): δ 143.1, 131.6, 130.3, 129.1, 128.3, 121.1, 73.9, 70.5, 37.8, 30.0, 26.2, 23.1.

**HRMS** (ESI+) (*m/z*): calculated for C<sub>14</sub>H<sub>17</sub>O<sub>1</sub>Br<sub>1</sub>Na<sub>1</sub> [M+Na]<sup>+</sup>: 303.0355; found: 303.0356.

[α]<sub>D</sub><sup>20</sup>: +79.0 (*c* = 0.90, CHCl<sub>3</sub>).

**GC**: The enantiomeric ratio was measured by GC analysis analysis on a chiral column (BGB-176 column: 30.0 m); FID; Temperature: 230 °C (injector), 350 °C (detector), 160 °C (55 min, 8 min, iso); 220 °C (3 min, iso); Gas: H<sub>2</sub> (0.50 bar); t<sub>R</sub> = 31.01 min (minor) and t<sub>R</sub> = 31.97 min (major), e.r. = 95:5.

**(2R,6S)-6-methyl-2-phenyl-3,6-dihydro-2H-pyran (3z)**

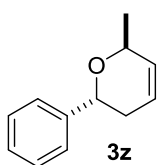

Aldehyde **1a** (21.2 mg, 0.2 mmol, 1.0 equiv) and diene **2e** (136 mg, 2.0 mmol, 10.0 equiv) were added to a mixture of catalyst **4d** (2 mol%) and 5 Å molecular sieves (42 mg) in MeCy (0.6 mL) at −78 °C, then the reaction mixture was stirred at −20 °C for 72 h. **3z** was obtained as a colorless oil (7.0 mg, 0.04 mmol, 20%).

**<sup>1</sup>H NMR** (500 MHz, CD<sub>2</sub>Cl<sub>2</sub>): δ 7.38–7.32 (m, 4H), 7.26 (tt, *J* = 7.2, 1.5 Hz, 1H), 5.93–5.88 (m, 1H), 5.78 (qd, *J* = 12.2, 2.0 Hz, 1H), 4.72 (t, *J* = 6.5 Hz, 1H), 4.46–4.41 (m, 1H), 2.26–2.23 (m, 2H), 1.30 (d, *J* = 6.8 Hz, 3H).

**<sup>13</sup>C NMR** (126 MHz, CD<sub>2</sub>Cl<sub>2</sub>): δ 143.4, 131.6, 128.6, 127.6, 126.6, 124.1, 69.9, 69.7, 32.6, 20.2.

**HRMS** (EI) (*m/z*): calculated for C<sub>12</sub>H<sub>14</sub>O<sub>1</sub> [*M*]: 174.1045; found: 174.1042.

[α]<sub>D</sub><sup>20</sup>: +124.0 (*c* = 0.15, CHCl<sub>3</sub>).

**GC**: The enantiomeric ratio was measured by GC analysis on a chiral column (Hydrodex-gamma-TBDAC column: 25.0 m; i.D. 0.25mm); FID; Temperature: 220 °C (injector), 350 °C (detector), 110 °C (30 min, iso); 230 °C (8 min); Gas: H<sub>2</sub> (0.50 bar); *t*<sub>R</sub> = 22.14 min (minor) and *t*<sub>R</sub> = 23.39 min (major), e.r. = 99:1.

### 6-methyl-3,6-dihydro-2*H*-pyran (**S12**)

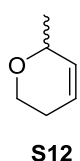

Paraformaldehyde (3 mg, 0.1 mmol), and diene **2e** (68 mg, 1.0 mmol) were added to a mixture of catalyst **4c** (1 mol%) and 5 Å molecular sieves (21 mg) in MeCy (0.3 mL) at 22 °C. The reaction mixture was stirred at 22 °C for 48 h. **S12** was obtained in 18% yield, determined by <sup>1</sup>H NMR analysis using internal standard because of the low boiling point of the compound<sup>34</sup>. Preliminary characterization:

**HRMS** (EI) (*m/z*): calculated for C<sub>6</sub>H<sub>11</sub>O<sub>1</sub> [*M*+H]<sup>+</sup>: 99.0804; found: 99.0805.

**GC**: The enantiomeric ratio was measured by GC analysis on a chiral column (Lipodex-A column: 30.0 m; i.D. 0.25mm); FID; Temperature: 200 °C (injector), 350 °C (detector), 35 °C (10 min, iso); Gas: H<sub>2</sub> (0.4 bar); *t*<sub>R</sub> = 4.05 min (major) and *t*<sub>R</sub> = 4.25 min (minor), e.r. = 50:50.

### (2*R*,6*S*)-6-hexyl-2-phenyl-3,6-dihydro-2*H*-pyran (**3aa**)

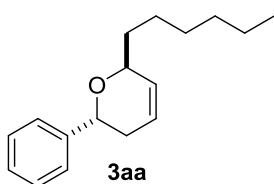

Aldehyde **1a** (10.6 mg, 0.1 mmol, 1.0 equiv) and diene **2f** (138 mg, 1.0 mmol, 10.0 equiv) were added to a mixture of catalyst **4e** (0.5 mol%) and 5 Å molecular sieves (21 mg) in MeCy (0.6 mL) at –78 °C, then the reaction mixture was stirred at –30 °C for 48 h. **3aa**

was obtained as a colorless oil (17.5 mg, 0.0716 mmol, 72%).

**<sup>1</sup>H NMR** (500 MHz, CD<sub>2</sub>Cl<sub>2</sub>): δ 7.38 (d, *J* = 7.3 Hz, 2H), 7.34 (t, *J* = 7.6 Hz, 2H), 7.26 (tt, *J* = 7.3, 1.3 Hz, 1H), 5.93–5.89 (m, 1H), 5.81 (qd, *J* = 10.3, 2.0 Hz, 1H), 4.69 (t, *J* = 6.6 Hz, 1H), 4.23–4.20 (m, 1H), 2.28–2.25 (m, 2H), 1.76–1.69 (m, 1H), 1.57–1.44 (m, 3H), 1.39–1.29 (m, 8H), 0.88 (t, *J* = 6.8 Hz, 3H).

**<sup>13</sup>C NMR** (126 MHz, CD<sub>2</sub>Cl<sub>2</sub>): δ 143.5, 130.7, 128.6, 127.6, 126.6, 124.2, 74.0, 69.6, 34.4, 32.5, 32.2, 29.7, 26.5, 23.1, 14.3.

**HRMS** (ESI+) (*m/z*): calculated for C<sub>17</sub>H<sub>24</sub>O<sub>1</sub>Na<sub>1</sub> [M+Na]<sup>+</sup>: 267.1719; found: 267.1720.

[α]<sub>D</sub><sup>25</sup>: +142.0 (*c* = 0.71, CH<sub>2</sub>Cl<sub>2</sub>).

**HPLC**: The enantiomeric ratio was measured by HPLC analysis using 150 mm 3-AmyCoat RP, i.D. 4.6 mm. Acetonitrile/H<sub>2</sub>O = 50:50, flow rate = 1.0 mL/min, λ = 220 nm, t<sub>R</sub> = 39.28 min (minor) and t<sub>R</sub> = 47.05 min (major), e.r. = 99.8:0.2.

#### (*R*)-6-cyclohexyl-2-phenyl-3,6-dihydro-2*H*-pyran (**3ab**)

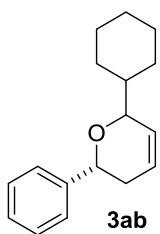

Aldehyde **1a** (10.6 mg, 0.1 mmol, 1.0 equiv) and diene **2g** (136 mg, 1.0 mmol, 10.0 equiv) were added to a mixture of catalyst **4e** (0.5 mol%) and 5 Å molecular sieves (21 mg) in MeCy (0.6 mL) at −78 °C, then the reaction mixture was stirred at −30 °C for 72 h. **3ab** was obtained as a colorless oil (*trans*-diastereomer: 13.1 mg, 0.0541 mmol, 54.1%; *cis*-diastereomer: 3.0 mg, 0.0124 mmol, 12.4%).

#### *trans*-diastereomer:

**<sup>1</sup>H NMR** (500 MHz, CD<sub>2</sub>Cl<sub>2</sub>): δ 7.39–7.37 (m, 2H), 7.33 (dt, *J* = 7.4, 2.0 Hz, 2H), 7.26 (tt, *J* = 6.6, 1.4 Hz, 1H), 5.97–5.91 (m, 2H), 4.70 (q, *J* = 4.3 Hz, 1H), 3.85 (dd, *J* = 8.1, 1.1 Hz, 1H), 2.33–2.21 (m, 2H), 2.01–1.94 (m, 1H), 1.78–1.63 (m, 6H), 1.30–0.97 (m, 6H).

**<sup>13</sup>C NMR** (126 MHz, CD<sub>2</sub>Cl<sub>2</sub>): δ 143.5, 129.1, 128.6, 127.5, 126.6, 124.7, 78.2, 70.4, 42.5, 32.3, 30.1, 29.8, 26.9, 26.6, 26.5.

**HRMS** (EI) (*m/z*): calculated for C<sub>17</sub>H<sub>22</sub>O<sub>1</sub> [M]: 242.1665; found: 242.1667.

$[\alpha]_D^{25}$ : +161.0 ( $c$  = 0.49, CH<sub>2</sub>Cl<sub>2</sub>).

**HPLC**: The enantiomeric ratio was measured by HPLC analysis using 150 mm 3-AmyCoat RP, i.D. 4.6 mm. Acetonitrile/H<sub>2</sub>O = 50:50, flow rate = 1.0 mL/min,  $\lambda$  = 220 nm,  $t_R$  = 31.65 min (minor) and  $t_R$  = 33.78 min (major), e.r. = 99.8:0.2.

***cis*-diastereomer:**

**<sup>1</sup>H NMR** (500 MHz, CD<sub>2</sub>Cl<sub>2</sub>):  $\delta$  7.38–7.36 (m, 2H), 7.33 (dt,  $J$  = 7.4, 2.0 Hz, 2H), 7.25 (tt,  $J$  = 6.6, 1.4 Hz, 1H), 5.94–5.90 (m, 1H), 5.78–5.74 (m, 1H), 4.57 (q,  $J$  = 4.7 Hz, 1H), 4.14–4.10 (m, 1H), 2.26–2.12 (m, 2H), 1.82–1.75 (m, 4H), 1.69–1.66 (m, 1H), 1.32–1.14 (m, 6H).

**<sup>13</sup>C NMR** (126 MHz, CD<sub>2</sub>Cl<sub>2</sub>):  $\delta$  144.0, 129.5, 128.5, 127.5, 126.1, 125.5, 79.9, 75.7, 43.4, 33.9, 29.2, 28.3, 27.1, 26.87, 26.86.

**HRMS** (ESI+) ( $m/z$ ): calculated for C<sub>17</sub>H<sub>22</sub>O<sub>1</sub>Na<sub>1</sub> [M+Na]<sup>+</sup>: 265.1563; found: 265.1565.

$[\alpha]_D^{25}$ : +39.0 ( $c$  = 0.11, CH<sub>2</sub>Cl<sub>2</sub>).

**HPLC**: The enantiomeric ratio was measured by HPLC analysis using 150 mm 3-AmyCoat RP, i.D. 4.6 mm. Acetonitrile/H<sub>2</sub>O = 50:50, flow rate = 1.0 mL/min,  $\lambda$  = 220 nm,  $t_R$  = 40.46 min (minor) and  $t_R$  = 42.39 min (major), e.r. = 97:3.

**(2*R*,6*R*)-4,6-dimethyl-2-phenyl-3,6-dihydro-2*H*-pyran (3ac)**

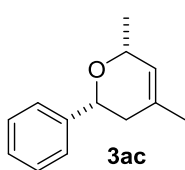

Aldehyde **1a** (21.2 mg, 0.20 mmol, 1.0 equiv) and diene **2h** (82 mg, 1.0 mmol, 5.0 equiv) were added to a mixture of catalyst **4d** (1 mol%) and 5 Å molecular sieves (140 mg) in MeCy (2.0 mL) at –78 °C, then the reaction mixture was stirred at –60 °C for 24 h. **3ac** was obtained as a colorless oil (30.5 mg, 0.162 mmol, 81%)<sup>21</sup>.

**<sup>1</sup>H NMR** (300 MHz, CD<sub>2</sub>Cl<sub>2</sub>):  $\delta$  7.40–7.23 (m, 5H), 5.42–5.40 (m, 1H), 4.56 (dd,  $J$  = 10.5, 3.7 Hz, 1H), 4.39–4.30 (m, 1H), 2.26–2.14 (m, 1H), 2.06 (td,  $J$  = 16.8, 2.7 Hz, 1H), 1.74–1.73 (m, 3H), 1.25 (d,  $J$  = 6.6 Hz, 3H).

**<sup>13</sup>C NMR** (75 MHz, CD<sub>2</sub>Cl<sub>2</sub>):  $\delta$  143.6, 132.5, 128.6, 127.6, 126.3, 125.6, 76.4, 72.0, 38.1, 22.9, 21.8.

**HRMS** (EI) ( $m/z$ ): calculated for  $C_{13}H_{16}O_1$  [M]: 188.1196; found: 188.1195.

$[\alpha]_D^{20}$ : +81.0 ( $c = 0.39$ ,  $CHCl_3$ ).

**GC**: The enantiomeric ratio was measured by GC analysis on a chiral column (Hydrodex-gamma-TBDAC column: 25.0 m); FID; Temperature: 230 °C (injector), 350 °C (detector), 100 °C (50 min, iso, 8 min); 220 °C (3 min); Gas:  $H_2$  (0.60 bar);  $t_R = 38.19$  min (minor) and  $t_R = 39.59$  min (major), e.r. = 96:4.

**(2*R*,8*aR*)-4-methyl-2-phenyl-3,5,6,7,8,8*a*-hexahydro-2*H*-chromene (3*ad*)**

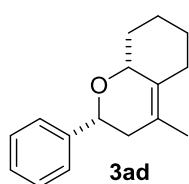

Aldehyde **1a** (10.6 mg, 0.10 mmol, 1.0 equiv) and diene **2i** (61 mg, 0.50 mmol, 5.0 equiv) were added to a mixture of catalyst **4f** (1 mol%) and 5 Å molecular sieves (70 mg) in MeCy (1.0 mL) at  $-78$  °C, then the reaction mixture was stirred at  $-60$  °C for 24 h. **3ad** was obtained as a colorless oil (19.4 mg, 0.085 mmol, 85%).

**$^1H$  NMR** (500 MHz,  $CD_2Cl_2$ ):  $\delta$  7.38–7.32 (m, 4H), 7.26 (tt,  $J = 7.2, 1.3$  Hz, 1H), 4.50 (dd,  $J = 10.9, 3.8$  Hz, 1H), 4.10 (d,  $J = 10.6$  Hz, 1H), 2.77 (qd,  $J = 14.2, 2.5$  Hz, 1H), 2.32–2.26 (m, 1H), 2.13–2.10 (m, 1H), 2.04 (qd,  $J = 16.6, 2.6$  Hz, 1H), 1.83–1.78 (m, 1H), 1.76–1.73 (m, 1H), 1.70 (s, 3H), 1.65 (d,  $J = 14.1$  Hz, 1H), 1.44 (tq,  $J = 13.3, 3.4$  Hz, 1H), 1.32 (dq,  $J = 11.7, 3.6$  Hz, 1H), 1.19 (tq,  $J = 13.0, 3.8$  Hz, 1H).

**$^{13}C$  NMR** (126 MHz,  $CD_2Cl_2$ ):  $\delta$  143.7, 132.4, 128.6, 127.5, 126.3, 122.3, 77.2, 75.3, 39.7, 35.0, 27.4, 27.2, 25.0, 18.3.

**HRMS** (EI) ( $m/z$ ): calculated for  $C_{16}H_{20}O_1$  [M]: 228.1509; found: 228.1510.

$[\alpha]_D^{25}$ : +144.0 ( $c = 0.86$ ,  $CH_2Cl_2$ ).

**HPLC**: The enantiomeric ratio was measured by HPLC analysis using 150 mm 3-AmyCoat RP, i.D. 4.6 mm. Acetonitrile/ $H_2O$  = 50:50, flow rate = 1.0 mL/min,  $\lambda = 220$  nm,  $t_R = 27.12$  min (minor) and  $t_R = 29.22$  min (major), e.r. = 95:5.

**(2*R*,6*S*)-4,6-di-*tert*-butyl-2-phenyl-3,6-dihydro-2*H*-pyran (3ae)**

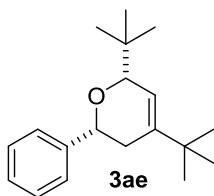

Aldehyde **1a** (10.6 mg, 0.10 mmol, 1.0 equiv) and diene **2j** (83 mg, 0.50 mmol, 5.0 equiv) were added to a mixture of catalyst **4d** (1 mol%) and 5 Å molecular sieves (70 mg) in MeCy (1.0 mL) at  $-78\text{ }^{\circ}\text{C}$ , then the reaction mixture was stirred at  $-60\text{ }^{\circ}\text{C}$  for 48 h. **3ae** was obtained as a colorless oil (20 mg, 0.0735 mmol, 73.5%).

**$^1\text{H}$  NMR** (500 MHz,  $\text{CD}_2\text{Cl}_2$ ):  $\delta$  7.41 (d,  $J = 7.4$  Hz, 2H), 7.35 (t,  $J = 7.4$  Hz, 2H), 7.26 (t,  $J = 7.4$  Hz, 1H), 5.56 (t,  $J = 2.0$  Hz, 1H), 4.46 (dd,  $J = 10.7, 2.9$  Hz, 1H), 3.94 (p,  $J = 2.3$  Hz, 1H), 2.26 (td,  $J = 16.4, 2.7$  Hz, 1H), 2.06 (ddt,  $J = 10.7, 2.8, 0.8$  Hz, 1H), 1.07 (s, 9H), 0.98 (s, 9H).

**$^{13}\text{C}$  NMR** (126 MHz,  $\text{CD}_2\text{Cl}_2$ ):  $\delta$  145.9, 144.6, 128.5, 127.4, 126.1, 117.8, 83.3, 75.9, 35.6, 35.4, 33.7, 28.8, 26.1.

**HRMS** (EI) ( $m/z$ ): calculated for  $\text{C}_{19}\text{H}_{28}\text{O}_1$  [ $\text{M}$ ]: 272.2140; found: 272.2140.

$[\alpha]_D^{20}$ : +101.0 ( $c = 0.50$ ,  $\text{CHCl}_3$ ).

**GC**: The enantiomeric ratio was measured by GC analysis on a chiral column (Cyclodextrin-H column: 25.0 m; i.D. 0.25mm); FID; Temperature:  $230\text{ }^{\circ}\text{C}$  (injector),  $350\text{ }^{\circ}\text{C}$  (detector),  $100\text{ }^{\circ}\text{C}$  (135 min, iso, 8 min);  $170\text{ }^{\circ}\text{C}$  (3 min, iso); Gas:  $\text{H}_2$  (0.50 bar);  $t_R = 113.99$  min (minor) and  $t_R = 119.57$  min (major), e.r. = 95:5.

**(2*R*,6*R*)-6-(2-(benzyloxy)ethyl)-4-methyl-2-phenyl-3,6-dihydro-2*H*-pyran (3af)**

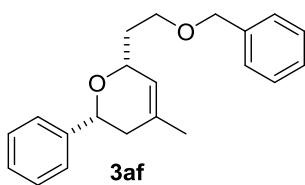

The aldehyde **1a** (10.6 mg, 0.10 mmol, 1.0 equiv) and diene **2k** (101 mg, 0.50 mmol, 5.0 equiv) were added to a mixture of catalyst **4d** (1 mol%) and 5 Å molecular sieves (70 mg) in MeCy (1.0 mL) at  $-78\text{ }^{\circ}\text{C}$ , then the reaction mixture was stirred at  $-60\text{ }^{\circ}\text{C}$  for 48 h. **3af** was obtained as a colorless solid (26 mg, 0.084 mmol, 84%).

**$^1\text{H}$  NMR** (500 MHz,  $\text{CD}_2\text{Cl}_2$ ):  $\delta$  7.38–7.30 (m, 8H), 7.28–7.25 (m, 2H), 5.54 (br s, 1H), 4.57 (dd,  $J = 10.6, 3.6$  Hz, 1H), 4.50 (s, 2H), 4.42–4.37 (m, 1H), 3.73–3.62 (m, 2H), 2.21–2.16 (m, 1H), 2.10 (td,  $J = 16.8, 3.0$  Hz, 1H), 1.95–1.81 (m, 2H), 1.74 (br s, 3H).

**$^{13}\text{C}$  NMR** (126 MHz,  $\text{CD}_2\text{Cl}_2$ ):  $\delta$  143.6, 139.4, 133.0, 128.6, 127.9, 127.7, 127.6, 126.1, 124.3, 76.0, 73.2, 73.1, 67.4, 38.2, 36.5, 23.0.

**HRMS** (ESI+) ( $m/z$ ): calculated for  $C_{21}H_{25}O_2$   $[M+H]^+$ : 309.1849; found: 309.1849.

$[\alpha]_D^{20}$ : +62.4 ( $c = 0.50$ ,  $CHCl_3$ ).

**HPLC**: The enantiomeric ratio was measured by HPLC analysis using Chiralpak OD-3, i.D. 4.6 mm. Heptane/ $i$ PrOH = 99:1, flow rate = 1.0 mL/min,  $\lambda = 220$  nm,  $t_R = 5.56$  min (minor) and  $t_R = 6.49$  min (major), e.r. = 95:5.

## Gram Scale Reaction and Derivatization

### Gram Scale Reaction

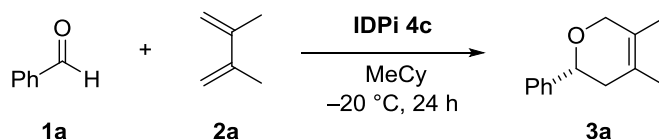

To a flame-dried Schlenk tube under argon were added 5 Å molecular sieves (700 mg), catalyst IDPi **4c** (45 mg, 0.02 mmol, 0.02 equiv), and MeCy (10.0 mL) at room temperature. Then aldehyde **1a** (1.06 g, 10.0 mmol, 1.0 equiv) and diene **2a** (986 mg, 12.0 mmol, 1.2 equiv) were added to the reaction mixture in sequence at  $-78\text{ }^{\circ}\text{C}$ . The reaction was stirred at  $-20\text{ }^{\circ}\text{C}$  for 24 h. Purification of product **3a** (1.83 g, 9.7 mmol, 97%, 98:2 e.r.) was performed by column chromatography on silica gel using 2% diethyl ether/pentane as the eluent. The catalyst IDPi **4c** could be recovered via the same column chromatography on silica gel using 50% hexanes/ethyl acetate as the eluent affording the salt state of IDPi **4c**. The salt was dissolved in  $\text{CH}_2\text{Cl}_2$  (10 mL) and stirred with HCl (6 M, aq., 10.0 mL) for 30 min. The organic layer was separated, washed with HCl (6 M, aq., 10.0 mL), and concentrated under reduced pressure affording the recovered catalyst IDPi **4c** (43.7 mg, 97%).

The recovered IDPi **4c** was continually employed to catalyze the [4+2]-cycloaddition reaction of aldehyde **1a** and diene **2a** (Table S3, entry 3).

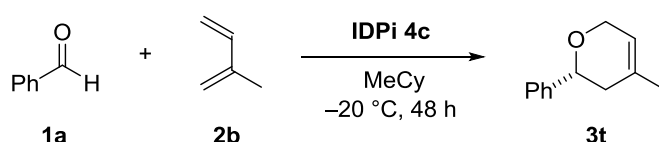

To a flame-dried Schlenk tube under argon were added 5 Å molecular sieves (700 mg), catalyst IDPi **4c** (45 mg, 0.02 mmol, 0.02 equiv), and MeCy (10.0 mL) at room temperature. Then aldehyde **1a** (1.06 g, 10.0 mmol, 1.0 equiv) and diene **2b** (817 mg, 12.0 mmol, 1.2 equiv) were added to the reaction mixture in sequence at  $-78\text{ }^{\circ}\text{C}$ . The reaction was stirred at  $-20\text{ }^{\circ}\text{C}$  for 48 h. Purification of product **3t** (1.51 g, 8.7 mmol, 87%, 98:2 e.r.) was performed by column chromatography on silica gel using 2% diethyl ether/pentane as the eluent. The catalyst IDPi **4c** was recovered via the same column chromatography.



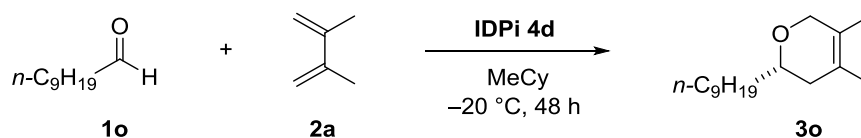

To a flame-dried Schlenk tube under argon were added 5 Å molecular sieves (1.05 g), catalyst IDPi **4d** (105 mg, 0.045 mmol, 0.01 equiv), and MeCy (15.0 mL) at room temperature. Then diene **2a** (3.70 g, 45.0 mmol, 10.0 equiv) and aldehyde **1o** (703 mg, 4.5 mmol, 1.0 equiv) were added to the reaction mixture in sequence at  $-20\text{ }^\circ\text{C}$ . The reaction was stirred at  $-20\text{ }^\circ\text{C}$  for 48 h. Purification of product **3o** (0.95 g, 4.0 mmol, 89%, 97:3 e.r.) was performed by column chromatography on silica gel using 2% diethyl ether/pentane as the eluent.

## Derivatization

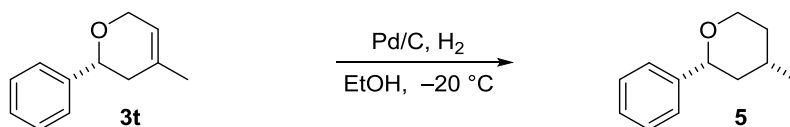

### (2*R*,4*S*)-4-methyl-2-phenyltetrahydro-2*H*-pyran (**5**)

**3t** (31.5 mg, 0.18 mmol, 1.0 equiv) was dissolved in ethanol (1.0 mL) at room temperature, followed by the addition of palladium (10%) on charcoal (10.4 mg). An atmosphere of hydrogen was introduced and the resulting suspension was stirred at  $-20\text{ }^\circ\text{C}$  for 2 h. The reaction mixture was warmed up to room temperature and stirred for 12 h. The reaction mixture was filtered over Celite and the residue was purified by column chromatography on silica gel using 5% diethyl ether/pentane as the eluent affording *Doremox* **5** as colorless oil. (31.0 mg, 0.18 mmol, 98%, *cis:trans* = 8.5:1, 98:2 e.r.<sub>*cis*</sub>, 94.5:5.5 e.r.<sub>*trans*</sub>).

**<sup>1</sup>H NMR** (600 MHz, CD<sub>2</sub>Cl<sub>2</sub>):  $\delta$  7.34–7.30 (m, 4H), 7.25–7.22 (m, 1H), 4.64 (*trans* isomer, dd, *J* = 9.9, 3.0 Hz, 0.12H), 4.29 (*cis* isomer, dd, *J* = 11.3, 2.2 Hz, 0.95H), 4.10 (*cis* isomer, ddd, *J* = 11.5, 4.7, 1.6 Hz, 0.97H), 3.81–3.79 (*trans* isomer, m, 0.24H), 3.57 (*cis* isomer, ddd, *J* = 12.4, 11.4, 2.2 Hz, 0.99H), 2.12–2.07 (*trans* isomer, m, 0.12H), 1.92–1.73 (m, 2.22H), 1.63–1.58 (m, 1.13H), 1.35–1.26 (m, 1.22H), 1.20–1.14 (m, 1.37H), 0.97 (d, *J* = 6.5 Hz, 3.0H), (spectra were complicated due to the presence of two diastereomers).

**<sup>13</sup>C NMR** (151 MHz, CD<sub>2</sub>Cl<sub>2</sub>):  $\delta$  144.1 (*cis* isomer), 143.8 (*trans* isomer), 128.54 (*trans* isomer), 128.52 (*cis* isomer), 127.5 (*cis* isomer), 127.3 (*trans* isomer), 126.4 (*trans* isomer),

126.2 (*cis* isomer), 80.0 (*cis* isomer), 74.2 (*trans* isomer), 68.8 (*cis* isomer), 63.3 (*trans* isomer), 43.3 (*cis* isomer), 39.6 (*trans* isomer), 34.9 (*cis* isomer), 32.4 (*trans* isomer), 31.2 (*cis* isomer), 25.9 (*trans* isomer), 22.5 (*cis* isomer), 18.5 (*trans* isomer), (spectra were complicated due to the presence of two diastereomers).

**HRMS** (ESI+) ( $m/z$ ) calculated for  $C_{12}H_{16}O_1Na_1$   $[M+Na]^+$ : 199.1093; found: 199.1094.

**GC**: The enantiomeric ratio was measured by GC analysis on a chiral column (Hydrodex-gamma-TBDAC column: 25.0 m; i.D. 0.25mm); FID; Temperature: 220 °C (injector), 350 °C (detector), 120 °C (30 min, iso); Gas:  $H_2$  (0.50 bar);  $t_R$  (*cis*) = 17.04 min (minor) and  $t_R$  (*cis*) = 17.76 min (major), e.r. = 98:2;  $t_R$  (*trans*) = 19.45 min (major) and  $t_R$  (*trans*) = 21.17 min (minor), e.r. = 94.5:5.5.

## Kinetic Isotope Effect (KIE) Studies

The relative  $^{13}\text{C}$  compositions of **3a** at C3 and C4 were respectively assigned to be 1.000 in this intramolecular KIE measurement. The relative  $^{13}\text{C}$  composition at C1 was calculated from the integration at C1 versus C4. The intramolecular KIE of C1 was the reciprocal of the average of relative  $^{13}\text{C}$  compositions at C1. Similarly, the relative  $^{13}\text{C}$  composition at C2 was calculated from the integration at C2 versus C3. The intramolecular KIE of C2 was the reciprocal of the average of relative  $^{13}\text{C}$  compositions at C2. The standard deviations in the parentheses were calculated in a standard way<sup>22,23</sup>.

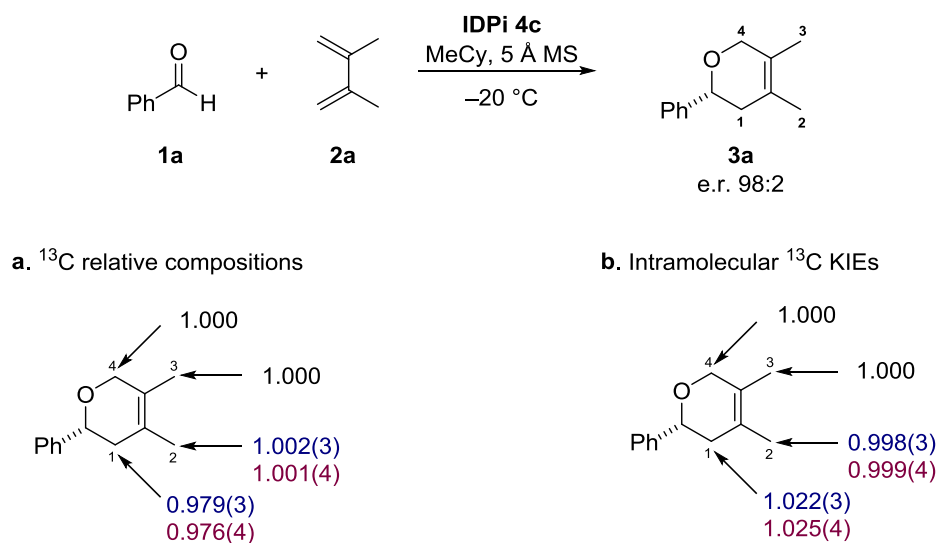

**Figure S6.** Intramolecular KIEs. (The values in blue were measured at  $15 \pm 0.6\%$  completion of **2a** and the values in purple were measured at  $16 \pm 0.8\%$  completion of **2a**.)

**Excess amount of diene reaction:**

In a flame-dried Schlenk tube under argon, catalyst **4c** (27 mg, 12  $\mu$ mol, 0.05 equiv), 5 Å molecular sieves (210 mg), MeCy (3.0 mL) were added. Subsequently, benzaldehyde (**1a**) (250 mg, 2.36 mmol, 1.0 equiv), followed by 2,3-dimethyl-1,3-butadiene (**2a**) (800 mg, 9.74 mmol, 4.1 equiv) were added in at  $-78\text{ }^{\circ}\text{C}$ . The reaction mixture was then stirred at  $-20\text{ }^{\circ}\text{C}$  for 30 min and quenched by the addition of trimethylamine (1 drop). The solution was warmed to room temperature and 1,2,4,5-tetramethylbenzene (134 mg, 1.0 mmol) was added as an internal standard. Analysis of the crude reaction mixture by  $^1\text{H}$  NMR showed that the reaction was quenched at  $15 \pm 0.6\%$  completion of **2a** (relative to starting diene **2a**). Purification of **3a** was performed by column chromatography on silica gel using diethyl 2–6% ether/pentane as the eluent (198 mg, 1.05 mmol). Under argon, the obtained **3a** was transferred to a NMR tube (50 mg of **3a** in 0.5 mL  $\text{CD}_2\text{Cl}_2$ ), and the NMR tube was then sealed by melting. Two samples were identically prepared for the following NMR analysis.

The reaction was carefully repeated and **3a** (210 mg, 1.12 mmol) was obtained at  $16 \pm 0.8\%$  completion of **2a** (relative to starting diene **2a**). Another two identical NMR samples were prepared.

 **$^{13}\text{C}$  spectra measurement:**

The  $^{13}\text{C}$  spectra were measured at 150.93 MHz on an Avance 600 MHz NMR spectrometer equipped with a cryogenically-cooled TXI ( $^1\text{H}/^{13}\text{C}/^{15}\text{N}$ ) probe head, using a single pulse calibrated at  $40^{\circ}$  followed by inverse-gated decoupling. A 40-s delay was used between pulses, the longest  $T_1$  for the  $^{13}\text{C}$  of interest being about 6 s (C3). To obtain digital resolution of at least 5 points at the peak linewidth at half-height, an instrumental maximum of 128K points were collected over a sweep-width of 155 ppm centered at 46 ppm, followed by zero-filling to 256K points before Fourier transformation. Integrations were determined numerically using a  $\pm 7.5$  Hz region for each peak. In general, an automatic polynomial baseline correction of order of at least 3 was applied. Integrals were simply calculated by summing the signal intensities over the peak regions.

**Table S14.** Values shown are raw  $^{13}\text{C}$  integrals of **3a** at  $15 \pm 0.6\%$  completion of **2a**.

| Sample | C <sub>1</sub> | C <sub>2</sub> | C <sub>3</sub> | C <sub>4</sub> |
|--------|----------------|----------------|----------------|----------------|
| 1      | 85901          | 91898          | 91307          | 88351          |
| 1      | 85960          | 92516          | 91861          | 87659          |
| 1      | 86779          | 92491          | 92002          | 88020          |
| 1      | 86069          | 92518          | 93114          | 87888          |
| 1      | 95521          | 102349         | 101247         | 97308          |
| 1      | 95284          | 101747         | 101450         | 97669          |
| 1      | 95647          | 101314         | 101403         | 97199          |
| 1      | 86724          | 92809          | 93180          | 88907          |
| 2      | 350900         | 373893         | 373560         | 360129         |
| 2      | 355073         | 377562         | 376117         | 362694         |
| 2      | 354592         | 377015         | 377226         | 362330         |
| 2      | 355307         | 378537         | 378589         | 363559         |
| 2      | 356656         | 379971         | 379377         | 365966         |
| 2      | 358969         | 382854         | 381606         | 366213         |
| 2      | 357178         | 379629         | 380955         | 364419         |
| 2      | 357657         | 381297         | 380861         | 365602         |

**Table S15.** Values shown are raw  $^{13}\text{C}$  integrals of **3a** at  $16 \pm 0.8\%$  completion of **2a**.

| Sample | C <sub>1</sub> | C <sub>2</sub> | C <sub>3</sub> | C <sub>4</sub> |
|--------|----------------|----------------|----------------|----------------|
| 1      | 88077          | 93934          | 94519          | 89963          |
| 1      | 88941          | 93702          | 94374          | 90204          |
| 1      | 88368          | 94464          | 95318          | 91427          |
| 1      | 88895          | 94891          | 94633          | 91014          |
| 1      | 85510          | 91436          | 90853          | 88089          |
| 1      | 85932          | 92064          | 91378          | 88353          |
| 1      | 86267          | 91589          | 91263          | 88107          |
| 1      | 85986          | 91887          | 91145          | 87680          |
| 2      | 86474          | 91458          | 91995          | 87824          |
| 2      | 86153          | 91650          | 91278          | 88730          |
| 2      | 86674          | 91770          | 92088          | 89318          |
| 2      | 87694          | 92747          | 92224          | 89682          |
| 2      | 86601          | 93065          | 92773          | 89684          |
| 2      | 87276          | 93685          | 93009          | 89642          |
| 2      | 87239          | 93314          | 92793          | 88873          |
| 2      | 87527          | 93076          | 93567          | 89466          |

## Single-Crystal X-ray Diffraction Analysis

### Determination of the absolute configuration of **3f** by X-ray diffraction

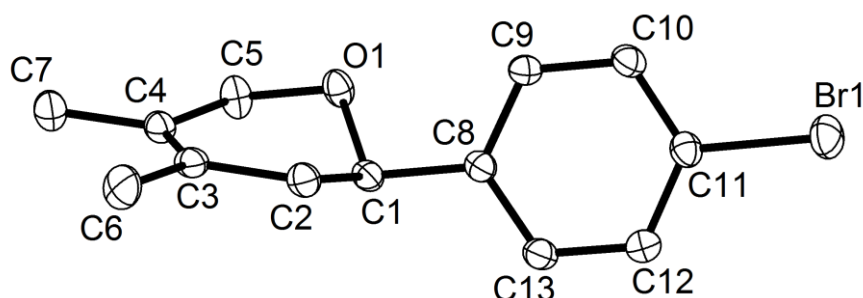

**Figure S7.** The molecular structure of **3f**. H atoms have been omitted for clarity.

#### Crystal data and structure refinement

|                                            |                                                                  |                       |
|--------------------------------------------|------------------------------------------------------------------|-----------------------|
| Identification code                        | <b>3f</b> (10450)                                                |                       |
| Empirical formula                          | C <sub>13</sub> H <sub>15</sub> Br O                             |                       |
| Color                                      | colourless                                                       |                       |
| Formula weight                             | 267.16 g·mol <sup>-1</sup>                                       |                       |
| Temperature                                | 100(2) K                                                         |                       |
| Wavelength                                 | 0.71073 Å                                                        |                       |
| Crystal system                             | orthorhombic                                                     |                       |
| Space group                                | <i>P</i> 2 <sub>1</sub> 2 <sub>1</sub> 2 <sub>1</sub> , (no. 19) |                       |
| Unit cell dimensions                       | <i>a</i> = 6.836(2) Å                                            | $\alpha = 90^\circ$ . |
|                                            | <i>b</i> = 11.5511(9) Å                                          | $\beta = 90^\circ$ .  |
|                                            | <i>c</i> = 15.3107(9) Å                                          | $\gamma = 90^\circ$ . |
| Volume                                     | 1208.9(4) Å <sup>3</sup>                                         |                       |
| <i>Z</i>                                   | 4                                                                |                       |
| Density (calculated)                       | 1.468 Mg·m <sup>-3</sup>                                         |                       |
| Absorption coefficient                     | 3.372 mm <sup>-1</sup>                                           |                       |
| <i>F</i> (000)                             | 544 e                                                            |                       |
| Crystal size                               | 0.23 x 0.15 x 0.09 mm <sup>3</sup>                               |                       |
| $\theta$ range for data collection         | 3.528 to 33.119°.                                                |                       |
| Index ranges                               | -10 ≤ <i>h</i> ≤ 10, -17 ≤ <i>k</i> ≤ 17, -23 ≤ <i>l</i> ≤ 23    |                       |
| Reflections collected                      | 65284                                                            |                       |
| Independent reflections                    | 4595 [ <i>R</i> <sub>int</sub> = 0.0406]                         |                       |
| Reflections with <i>I</i> > 2σ( <i>I</i> ) | 4427                                                             |                       |
| Completeness to $\theta = 25.242^\circ$    | 99.1 %                                                           |                       |
| Absorption correction                      | Gaussian                                                         |                       |
| Max. and min. transmission                 | 0.75447 and 0.51719                                              |                       |

|                                      |                                    |                 |
|--------------------------------------|------------------------------------|-----------------|
| Refinement method                    | Full-matrix least-squares on $F^2$ |                 |
| Data / restraints / parameters       | 4595 / 0 / 138                     |                 |
| Goodness-of-fit on $F^2$             | 1.109                              |                 |
| Final R indices [ $I > 2\sigma(I)$ ] | $R_1 = 0.0203$                     | $wR^2 = 0.0521$ |
| R indices (all data)                 | $R_1 = 0.0220$                     | $wR^2 = 0.0530$ |
| Absolute structure parameter         | -0.006(3)                          |                 |
| Extinction coefficient               | 0                                  |                 |
| Largest diff. peak and hole          | 0.463 and -0.355 e·Å <sup>-3</sup> |                 |

**Atomic coordinates and equivalent isotropic displacement parameters (Å<sup>2</sup>).**

$U_{eq}$  is defined as one third of the trace of the orthogonalized  $U_{ij}$  tensor.

|       | x          | y          | z         | $U_{eq}$ |
|-------|------------|------------|-----------|----------|
| C(1)  | 0.2649(2)  | 0.3189(2)  | 0.5884(1) | 0.018(1) |
| C(2)  | 0.0983(2)  | 0.3329(2)  | 0.6540(1) | 0.020(1) |
| C(3)  | 0.0412(2)  | 0.4578(2)  | 0.6672(1) | 0.021(1) |
| C(4)  | 0.1547(2)  | 0.5432(2)  | 0.6371(1) | 0.021(1) |
| C(5)  | 0.3487(2)  | 0.5167(2)  | 0.5945(1) | 0.023(1) |
| C(6)  | -0.1475(3) | 0.4750(2)  | 0.7163(2) | 0.032(1) |
| C(7)  | 0.1107(3)  | 0.6705(2)  | 0.6422(1) | 0.028(1) |
| C(8)  | 0.3544(2)  | 0.1997(1)  | 0.5929(1) | 0.017(1) |
| C(9)  | 0.5089(2)  | 0.1772(2)  | 0.6500(1) | 0.020(1) |
| C(10) | 0.5871(2)  | 0.0659(2)  | 0.6570(1) | 0.022(1) |
| C(11) | 0.5082(2)  | -0.0221(1) | 0.6060(1) | 0.020(1) |
| C(12) | 0.3551(3)  | -0.0018(1) | 0.5486(1) | 0.022(1) |
| C(13) | 0.2789(2)  | 0.1097(2)  | 0.5422(1) | 0.021(1) |
| Br(1) | 0.6150(1)  | -0.1736(1) | 0.6157(1) | 0.029(1) |
| O(1)  | 0.4148(2)  | 0.4013(1)  | 0.6078(1) | 0.021(1) |

**Bond lengths [Å] and angles [°].**

|            |          |            |          |
|------------|----------|------------|----------|
| C(1)-O(1)  | 1.430(2) | C(1)-C(8)  | 1.508(2) |
| C(1)-C(2)  | 1.528(2) | C(2)-C(3)  | 1.507(2) |
| C(3)-C(4)  | 1.337(3) | C(3)-C(6)  | 1.506(2) |
| C(4)-C(7)  | 1.502(2) | C(4)-C(5)  | 1.509(2) |
| C(5)-O(1)  | 1.422(2) | C(8)-C(9)  | 1.396(2) |
| C(8)-C(13) | 1.397(2) | C(9)-C(10) | 1.397(2) |



|                   |            |                   |            |
|-------------------|------------|-------------------|------------|
| C(10)-C(11)       | 1.390(2)   | C(11)-C(12)       | 1.387(2)   |
| C(11)-Br(1)       | 1.9020(16) | C(12)-C(13)       | 1.393(2)   |
| O(1)-C(1)-C(8)    | 107.89(12) | O(1)-C(1)-C(2)    | 109.09(13) |
| C(8)-C(1)-C(2)    | 111.72(13) | C(3)-C(2)-C(1)    | 112.47(14) |
| C(4)-C(3)-C(6)    | 124.83(17) | C(4)-C(3)-C(2)    | 120.68(14) |
| C(6)-C(3)-C(2)    | 114.48(16) | C(3)-C(4)-C(7)    | 126.01(15) |
| C(3)-C(4)-C(5)    | 120.57(15) | C(7)-C(4)-C(5)    | 113.41(15) |
| O(1)-C(5)-C(4)    | 114.07(14) | C(9)-C(8)-C(13)   | 119.29(15) |
| C(9)-C(8)-C(1)    | 120.38(14) | C(13)-C(8)-C(1)   | 120.29(14) |
| C(8)-C(9)-C(10)   | 120.58(15) | C(11)-C(10)-C(9)  | 118.82(14) |
| C(12)-C(11)-C(10) | 121.68(15) | C(12)-C(11)-Br(1) | 119.63(13) |
| C(10)-C(11)-Br(1) | 118.70(12) | C(11)-C(12)-C(13) | 118.89(15) |
| C(12)-C(13)-C(8)  | 120.74(15) | C(5)-O(1)-C(1)    | 111.52(12) |

#### Anisotropic displacement parameters (Å<sup>2</sup>).

The anisotropic displacement factor exponent takes the form:

$$-2\pi^2 [h^2 a^{*2} U_{11} + \dots + 2 h k a^* b^* U_{12}].$$

|       | U <sub>11</sub> | U <sub>22</sub> | U <sub>33</sub> | U <sub>23</sub> | U <sub>13</sub> | U <sub>12</sub> |
|-------|-----------------|-----------------|-----------------|-----------------|-----------------|-----------------|
| C(1)  | 0.016(1)        | 0.021(1)        | 0.016(1)        | 0.000(1)        | 0.000(1)        | 0.003(1)        |
| C(2)  | 0.015(1)        | 0.024(1)        | 0.021(1)        | -0.002(1)       | 0.003(1)        | 0.001(1)        |
| C(3)  | 0.015(1)        | 0.027(1)        | 0.019(1)        | -0.005(1)       | 0.000(1)        | 0.002(1)        |
| C(4)  | 0.019(1)        | 0.024(1)        | 0.019(1)        | -0.004(1)       | -0.002(1)       | 0.005(1)        |
| C(5)  | 0.023(1)        | 0.020(1)        | 0.027(1)        | 0.004(1)        | 0.006(1)        | 0.004(1)        |
| C(6)  | 0.019(1)        | 0.036(1)        | 0.041(1)        | -0.011(1)       | 0.008(1)        | 0.003(1)        |
| C(7)  | 0.029(1)        | 0.025(1)        | 0.030(1)        | -0.003(1)       | -0.001(1)       | 0.008(1)        |
| C(8)  | 0.016(1)        | 0.021(1)        | 0.015(1)        | 0.000(1)        | 0.001(1)        | 0.002(1)        |
| C(9)  | 0.020(1)        | 0.022(1)        | 0.017(1)        | -0.002(1)       | -0.004(1)       | 0.002(1)        |
| C(10) | 0.022(1)        | 0.024(1)        | 0.019(1)        | 0.001(1)        | -0.004(1)       | 0.004(1)        |
| C(11) | 0.022(1)        | 0.020(1)        | 0.018(1)        | 0.002(1)        | 0.001(1)        | 0.003(1)        |
| C(12) | 0.023(1)        | 0.022(1)        | 0.021(1)        | -0.002(1)       | -0.002(1)       | 0.000(1)        |
| C(13) | 0.019(1)        | 0.024(1)        | 0.019(1)        | -0.001(1)       | -0.003(1)       | 0.002(1)        |
| Br(1) | 0.037(1)        | 0.021(1)        | 0.029(1)        | 0.004(1)        | -0.001(1)       | 0.007(1)        |
| O(1)  | 0.015(1)        | 0.020(1)        | 0.027(1)        | 0.002(1)        | 0.003(1)        | 0.002(1)        |

**Hydrogen coordinates and isotropic displacement parameters (Å<sup>2</sup>).**

|       | x       | y       | z      | U <sub>eq</sub> |
|-------|---------|---------|--------|-----------------|
| H(1)  | 0.2141  | 0.3330  | 0.5281 | 0.021           |
| H(2A) | -0.0170 | 0.2890  | 0.6333 | 0.024           |
| H(2B) | 0.1388  | 0.2996  | 0.7108 | 0.024           |
| H(5A) | 0.3372  | 0.5309  | 0.5309 | 0.028           |
| H(5B) | 0.4484  | 0.5707  | 0.6177 | 0.028           |
| H(6A) | -0.1378 | 0.4383  | 0.7738 | 0.048           |
| H(6B) | -0.2553 | 0.4399  | 0.6834 | 0.048           |
| H(6C) | -0.1722 | 0.5580  | 0.7235 | 0.048           |
| H(7A) | -0.0276 | 0.6816  | 0.6568 | 0.042           |
| H(7B) | 0.1386  | 0.7068  | 0.5857 | 0.042           |
| H(7C) | 0.1924  | 0.7061  | 0.6874 | 0.042           |
| H(9)  | 0.5614  | 0.2382  | 0.6845 | 0.024           |
| H(10) | 0.6922  | 0.0506  | 0.6959 | 0.026           |
| H(12) | 0.3031  | -0.0630 | 0.5142 | 0.026           |
| H(13) | 0.1743  | 0.1246  | 0.5029 | 0.025           |

The structure of **3f** was solved by direct methods and refined by full-matrix least-squares against  $F^2$  to  $R_1 = 0.0203$  [ $I > 2\sigma(I)$ ],  $wR_2 = 0.0530$ , 138 parameters. H atoms were refined using a riding model with C–H distances of 0.98 Å and  $U_H = 1.5 \times U_C(\text{CH}_3)$ , 0.99 Å and  $U_H = 1.2 \times U_C(\text{CH}_2)$ , 1.0 Å and  $U_H = 1.2 \times U_C(\text{CH})$  and 0.95 Å and  $U_H = 1.2 \times U_C(\text{CH}_{\text{aromatic}})$ .  $S = 1.109$ , residual electron density 0.46 (1.09 Å from H5A)/ -0.36 (0.60 from Br1) e Å<sup>-3</sup>. Three independent crystals from the sample **3f** were investigated and their absolute configurations determined. The respective Flack parameters (Parsons' method: Parsons, Flack and Wagner, *Acta Cryst. B* 69 (2013) 249-259) are -0.006(3) [1850 quotients] (this crystal), -0.007(7) [1328 quotients] (crystal 2, Mo-K $\alpha$  X-radiation,  $R_1 = 0.0364$ ,  $S = 1.005$ , data completeness 99.7 %), and -0.011(9) [867 quotients] (crystal 3, Cu-K $\alpha$  X-radiation,  $R_1 = 0.0258$ ,  $S = 1.096$ , data completeness 98.4 %). **CCDC 1559570**.

## Crystal structure analysis of the imidodiphosphorimidate (IDPI) **4c**

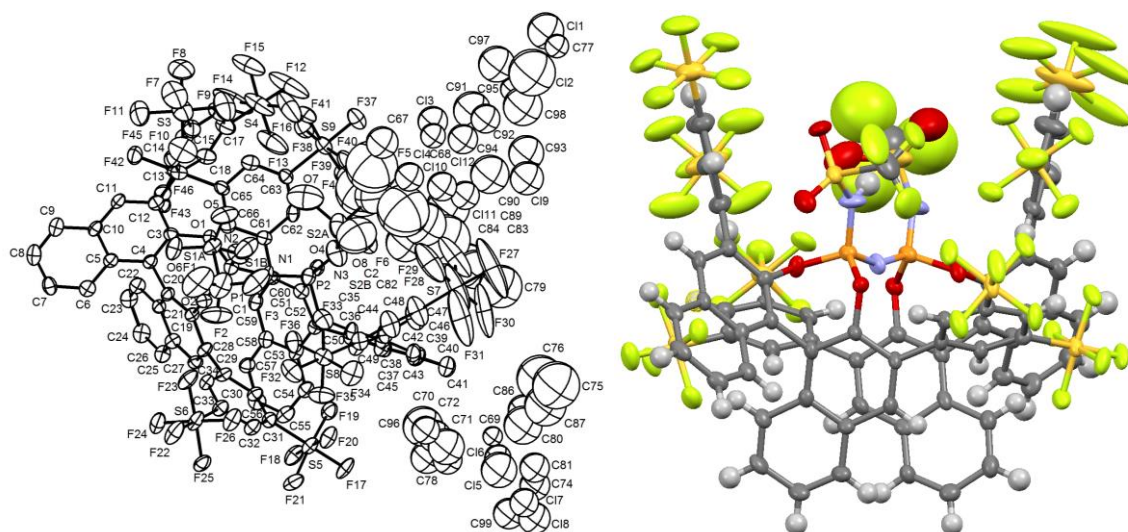

**Figure S8.** Left: The structure of the asymmetric unit in the crystal of **4c**, with crystal solvent (hexane and dichloromethane). H atoms have been omitted for clarity. Right: The molecular structure of **4c**, without crystal solvent.

### Crystal data and structure refinement

|                                    |                                                                                                                                                 |
|------------------------------------|-------------------------------------------------------------------------------------------------------------------------------------------------|
| Identification code                | <b>4c</b> (10698)                                                                                                                               |
| Empirical formula                  | C <sub>83.20</sub> H <sub>33</sub> Cl <sub>3.80</sub> F <sub>44.80</sub> N <sub>3</sub> O <sub>7.20</sub> P <sub>2</sub> S <sub>10</sub>        |
| Color                              | colourless                                                                                                                                      |
| Formula weight                     | 2558.17 g·mol <sup>-1</sup>                                                                                                                     |
| Temperature                        | 100(2) K                                                                                                                                        |
| Wavelength                         | 1.54178 Å                                                                                                                                       |
| Crystal system                     | orthorhombic                                                                                                                                    |
| Space group                        | <i>P</i> 2 <sub>1</sub> 2 <sub>1</sub> 2, (no. 18)                                                                                              |
| Unit cell dimensions               | <i>a</i> = 18.7656(13) Å $\alpha = 90^\circ$ .<br><i>b</i> = 41.726(3) Å $\beta = 90^\circ$ .<br><i>c</i> = 14.4668(10) Å $\gamma = 90^\circ$ . |
| Volume                             | 11327.8(14) Å <sup>3</sup>                                                                                                                      |
| <i>Z</i>                           | 4                                                                                                                                               |
| Density (calculated)               | 1.500 Mg·m <sup>-3</sup>                                                                                                                        |
| Absorption coefficient             | 4.015 mm <sup>-1</sup>                                                                                                                          |
| <i>F</i> (000)                     | 5074 e                                                                                                                                          |
| Crystal size                       | 0.300 x 0.189 x 0.030 mm <sup>3</sup>                                                                                                           |
| $\theta$ range for data collection | 4.831 to 63.596°.                                                                                                                               |
| Index ranges                       | -21 ≤ <i>h</i> ≤ 21, -47 ≤ <i>k</i> ≤ 48, -14 ≤ <i>l</i> ≤ 16                                                                                   |
| Reflections collected              | 165258                                                                                                                                          |

|                                         |                                           |                 |
|-----------------------------------------|-------------------------------------------|-----------------|
| Independent reflections                 | 18356 [ $R_{\text{int}} = 0.0717$ ]       |                 |
| Reflections with $I > 2\sigma(I)$       | 16034                                     |                 |
| Completeness to $\theta = 63.596^\circ$ | 99.1 %                                    |                 |
| Absorption correction                   | Gaussian                                  |                 |
| Max. and min. transmission              | 0.90830 and 0.51138                       |                 |
| Refinement method                       | Full-matrix least-squares on $F^2$        |                 |
| Data / restraints / parameters          | 18356 / 46 / 1405                         |                 |
| Goodness-of-fit on $F^2$                | 1.513                                     |                 |
| Final R indices [ $I > 2\sigma(I)$ ]    | $R_1 = 0.0674$                            | $wR^2 = 0.1847$ |
| R indices (all data)                    | $R_1 = 0.0785$                            | $wR^2 = 0.1920$ |
| Absolute structure parameter            | 0.031(4)                                  |                 |
| Extinction coefficient                  | 0                                         |                 |
| Largest diff. peak and hole             | 0.905 and -0.805 e $\cdot\text{\AA}^{-3}$ |                 |

### Atomic coordinates and equivalent isotropic displacement parameters ( $\text{\AA}^2$ ).

$U_{\text{eq}}$  is defined as one third of the trace of the orthogonalized  $U_{ij}$  tensor.

|       | x          | y         | z          | $U_{\text{eq}}$ |
|-------|------------|-----------|------------|-----------------|
| C(1)  | -0.0927(7) | 0.3431(4) | 0.5747(8)  | 0.068(4)        |
| C(2)  | 0.1322(13) | 0.4636(6) | 0.3201(18) | 0.203(16)       |
| C(3)  | -0.1190(4) | 0.3272(2) | 0.2149(5)  | 0.027(2)        |
| C(4)  | -0.1132(4) | 0.2951(2) | 0.1997(4)  | 0.025(1)        |
| C(5)  | -0.1765(3) | 0.2761(2) | 0.1881(5)  | 0.026(2)        |
| C(6)  | -0.1755(4) | 0.2426(2) | 0.1802(5)  | 0.031(2)        |
| C(7)  | -0.2386(4) | 0.2255(2) | 0.1698(5)  | 0.033(2)        |
| C(8)  | -0.3053(4) | 0.2416(2) | 0.1692(5)  | 0.037(2)        |
| C(9)  | -0.3075(4) | 0.2742(2) | 0.1772(5)  | 0.030(2)        |
| C(10) | -0.2437(3) | 0.2927(2) | 0.1873(5)  | 0.027(2)        |
| C(11) | -0.2458(3) | 0.3257(2) | 0.1999(5)  | 0.028(2)        |
| C(12) | -0.1853(4) | 0.3440(2) | 0.2145(5)  | 0.030(2)        |
| C(13) | -0.1913(4) | 0.3790(2) | 0.2275(5)  | 0.031(2)        |
| C(14) | -0.2424(4) | 0.3916(2) | 0.2894(6)  | 0.039(2)        |
| C(15) | -0.2506(4) | 0.4242(2) | 0.2958(6)  | 0.043(2)        |
| C(16) | -0.2105(5) | 0.4456(2) | 0.2446(7)  | 0.052(2)        |
| C(17) | -0.1597(5) | 0.4330(2) | 0.1841(7)  | 0.048(2)        |
| C(18) | -0.1497(4) | 0.4002(2) | 0.1766(6)  | 0.041(2)        |
| C(19) | -0.0018(3) | 0.2821(2) | 0.2825(4)  | 0.024(1)        |

|       |            |           |            |          |
|-------|------------|-----------|------------|----------|
| C(20) | -0.0423(3) | 0.2793(2) | 0.2040(5)  | 0.026(2) |
| C(21) | -0.0156(4) | 0.2594(2) | 0.1311(5)  | 0.027(2) |
| C(22) | -0.0490(4) | 0.2573(2) | 0.0444(5)  | 0.030(2) |
| C(23) | -0.0231(4) | 0.2377(2) | -0.0240(5) | 0.037(2) |
| C(24) | 0.0378(4)  | 0.2190(2) | -0.0065(5) | 0.037(2) |
| C(25) | 0.0720(4)  | 0.2203(2) | 0.0755(5)  | 0.032(2) |
| C(26) | 0.0476(4)  | 0.2411(2) | 0.1460(5)  | 0.028(2) |
| C(27) | 0.0834(4)  | 0.2433(2) | 0.2328(5)  | 0.028(2) |
| C(28) | 0.0595(3)  | 0.2632(2) | 0.3005(4)  | 0.025(1) |
| C(29) | 0.0913(4)  | 0.2616(2) | 0.3962(5)  | 0.029(2) |
| C(30) | 0.1641(4)  | 0.2630(2) | 0.4099(5)  | 0.029(2) |
| C(31) | 0.1922(4)  | 0.2579(2) | 0.4975(5)  | 0.029(2) |
| C(32) | 0.1477(4)  | 0.2506(2) | 0.5721(5)  | 0.033(2) |
| C(33) | 0.0748(4)  | 0.2482(2) | 0.5559(5)  | 0.031(2) |
| C(34) | 0.0474(4)  | 0.2539(2) | 0.4701(5)  | 0.028(2) |
| C(35) | 0.2607(4)  | 0.3532(2) | 0.3578(5)  | 0.030(2) |
| C(36) | 0.2917(4)  | 0.3416(2) | 0.2776(5)  | 0.030(2) |
| C(37) | 0.3657(4)  | 0.3473(2) | 0.2622(5)  | 0.036(2) |
| C(38) | 0.3991(4)  | 0.3406(2) | 0.1758(5)  | 0.036(2) |
| C(39) | 0.4693(4)  | 0.3488(2) | 0.1631(6)  | 0.043(2) |
| C(40) | 0.5094(5)  | 0.3617(2) | 0.2346(7)  | 0.050(2) |
| C(41) | 0.4793(4)  | 0.3686(2) | 0.3167(6)  | 0.043(2) |
| C(42) | 0.4060(4)  | 0.3623(2) | 0.3334(6)  | 0.036(2) |
| C(43) | 0.3726(4)  | 0.3715(2) | 0.4160(6)  | 0.039(2) |
| C(44) | 0.2996(4)  | 0.3677(2) | 0.4293(5)  | 0.034(2) |
| C(45) | 0.2668(4)  | 0.3808(2) | 0.5138(5)  | 0.036(2) |
| C(46) | 0.2838(6)  | 0.4109(3) | 0.5440(7)  | 0.063(3) |
| C(47) | 0.2534(6)  | 0.4231(3) | 0.6257(7)  | 0.068(3) |
| C(48) | 0.2061(6)  | 0.4044(2) | 0.6782(7)  | 0.061(3) |
| C(49) | 0.1888(4)  | 0.3742(2) | 0.6464(5)  | 0.038(2) |
| C(50) | 0.2180(4)  | 0.3615(2) | 0.5661(5)  | 0.034(2) |
| C(51) | 0.1884(4)  | 0.3429(2) | 0.1702(5)  | 0.029(2) |
| C(52) | 0.2461(4)  | 0.3263(2) | 0.2059(5)  | 0.029(2) |
| C(53) | 0.2586(3)  | 0.2949(2) | 0.1730(5)  | 0.029(2) |
| C(54) | 0.3097(4)  | 0.2745(2) | 0.2155(5)  | 0.033(2) |
| C(55) | 0.3197(4)  | 0.2431(2) | 0.1826(5)  | 0.039(2) |
| C(56) | 0.2816(4)  | 0.2325(2) | 0.1048(5)  | 0.036(2) |
| C(57) | 0.2323(4)  | 0.2515(2) | 0.0623(5)  | 0.031(2) |
| C(58) | 0.2180(4)  | 0.2830(2) | 0.0962(5)  | 0.029(2) |

|       |            |            |            |           |
|-------|------------|------------|------------|-----------|
| C(59) | 0.1651(4)  | 0.3033(2)  | 0.0572(5)  | 0.032(2)  |
| C(60) | 0.1499(4)  | 0.3326(2)  | 0.0912(5)  | 0.026(2)  |
| C(61) | 0.0998(4)  | 0.3548(2)  | 0.0421(5)  | 0.028(2)  |
| C(62) | 0.1227(4)  | 0.3859(2)  | 0.0221(5)  | 0.031(2)  |
| C(63) | 0.0815(4)  | 0.4055(2)  | -0.0332(5) | 0.028(2)  |
| C(64) | 0.0164(4)  | 0.3957(2)  | -0.0689(5) | 0.035(2)  |
| C(65) | -0.0058(4) | 0.3648(2)  | -0.0458(5) | 0.031(2)  |
| C(66) | 0.0349(4)  | 0.3439(2)  | 0.0092(5)  | 0.032(2)  |
| C(67) | -0.026(4)  | 0.5337(17) | 0.623(5)   | 0.14(2)   |
| C(68) | 0.036(2)   | 0.5669(11) | 0.660(3)   | 0.083(12) |
| C(69) | 0.444(2)   | 0.3890(11) | 0.913(3)   | 0.051(11) |
| C(70) | 0.3138(9)  | 0.3638(4)  | 0.9426(12) | 0.107(5)  |
| C(71) | 0.3838(17) | 0.3577(7)  | 0.902(2)   | 0.178(11) |
| C(72) | 0.3852(12) | 0.3514(5)  | 0.8029(16) | 0.144(7)  |
| C(73) | 0.4503(14) | 0.3365(6)  | 0.7647(19) | 0.117(7)  |
| C(74) | 0.6996(17) | 0.3420(8)  | 0.559(2)   | 0.123(9)  |
| C(75) | 0.529(5)   | 0.447(2)   | 0.782(7)   | 0.31(4)   |
| C(76) | 0.534(5)   | 0.434(2)   | 0.662(6)   | 0.30(4)   |
| C(77) | 0.352(3)   | 0.6380(12) | 0.000(3)   | 0.077(12) |
| C(78) | 0.4494(12) | 0.3193(5)  | 0.6588(16) | 0.142(7)  |
| C(79) | 0.437(2)   | 0.4626(10) | 0.398(3)   | 0.262(17) |
| C(80) | 0.591(3)   | 0.3843(12) | 0.596(4)   | 0.188(17) |
| C(81) | 0.6619(17) | 0.3586(8)  | 0.602(2)   | 0.121(9)  |
| C(82) | 0.3048(18) | 0.4290(8)  | 0.151(2)   | 0.211(12) |
| C(83) | 0.348(5)   | 0.4560(17) | 0.217(5)   | 0.33(3)   |
| C(84) | 0.400(3)   | 0.4567(13) | 0.322(5)   | 0.20(2)   |
| C(85) | 0.380(3)   | 0.4419(14) | 0.161(4)   | 0.108(16) |
| C(86) | 0.600(5)   | 0.389(3)   | 0.507(8)   | 0.13(3)   |
| C(87) | 0.566(8)   | 0.419(4)   | 0.691(10)  | 0.25(6)   |
| C(88) | 0.404(3)   | 0.4524(11) | 0.234(4)   | 0.160(15) |
| C(89) | 0.281(5)   | 0.4597(18) | 0.243(6)   | 0.28(3)   |
| C(90) | 0.361(4)   | 0.4683(16) | 0.056(5)   | 0.26(3)   |
| C(91) | 0.326(5)   | 0.541(2)   | -0.091(7)  | 0.19(3)   |
| C(92) | 0.320(3)   | 0.5505(16) | 0.019(4)   | 0.118(18) |
| C(93) | 0.413(5)   | 0.549(2)   | 0.080(6)   | 0.18(3)   |
| C(94) | 0.324(3)   | 0.5206(16) | -0.022(5)  | 0.121(18) |
| C(95) | 0.342(2)   | 0.5822(11) | -0.025(3)  | 0.079(11) |
| C(96) | 0.399(3)   | 0.3417(14) | 0.669(4)   | 0.21(2)   |
| C(97) | 0.308(5)   | 0.588(2)   | -0.102(7)  | 0.18(3)   |

|       |            |           |            |           |
|-------|------------|-----------|------------|-----------|
| C(98) | 0.359(7)   | 0.580(3)  | 0.044(9)   | 0.22(4)   |
| C(99) | 0.701(5)   | 0.306(3)  | 0.537(7)   | 0.13(3)   |
| N(1)  | 0.0636(3)  | 0.3502(2) | 0.3053(4)  | 0.036(2)  |
| N(2A) | -0.0478(4) | 0.3613(2) | 0.4081(5)  | 0.048(2)  |
| N(2B) | -0.0478(4) | 0.3613(2) | 0.4081(5)  | 0.048(2)  |
| N(3A) | 0.1359(5)  | 0.4043(2) | 0.3498(6)  | 0.066(2)  |
| N(3B) | 0.1359(5)  | 0.4043(2) | 0.3498(6)  | 0.066(2)  |
| O(1)  | -0.0571(2) | 0.3453(1) | 0.2326(4)  | 0.032(1)  |
| O(2)  | -0.0232(2) | 0.3040(1) | 0.3516(3)  | 0.028(1)  |
| O(3)  | 0.1863(2)  | 0.3488(1) | 0.3700(3)  | 0.035(1)  |
| O(4)  | 0.1696(3)  | 0.3722(1) | 0.2120(3)  | 0.031(1)  |
| O(5)  | -0.1466(5) | 0.3905(2) | 0.4826(6)  | 0.063(2)  |
| O(6)  | -0.1675(4) | 0.3358(2) | 0.4240(5)  | 0.048(2)  |
| O(7)  | 0.0153(8)  | 0.4304(3) | 0.3361(9)  | 0.119(4)  |
| O(8)  | 0.1010(12) | 0.4386(5) | 0.4791(13) | 0.186(7)  |
| F(1)  | -0.1516(5) | 0.3389(3) | 0.6237(5)  | 0.107(4)  |
| F(2)  | -0.0569(5) | 0.3175(2) | 0.5644(6)  | 0.090(3)  |
| F(3)  | -0.0526(4) | 0.3662(2) | 0.6167(5)  | 0.083(3)  |
| F(4)  | 0.1332(19) | 0.4545(8) | 0.2377(19) | 0.364(11) |
| F(5)  | 0.0871(19) | 0.4855(6) | 0.332(2)   | 0.364(11) |
| F(6)  | 0.1901(16) | 0.4691(8) | 0.353(2)   | 0.364(11) |
| F(7)  | -0.3746(4) | 0.4542(2) | 0.4431(5)  | 0.084(2)  |
| F(8)  | -0.3467(3) | 0.4643(1) | 0.2980(5)  | 0.074(2)  |
| F(9)  | -0.2647(4) | 0.4668(2) | 0.4098(5)  | 0.080(2)  |
| F(10) | -0.2924(4) | 0.4173(2) | 0.4545(4)  | 0.079(2)  |
| F(11) | -0.3743(3) | 0.4148(1) | 0.3427(5)  | 0.069(2)  |
| F(12) | -0.0636(5) | 0.4838(2) | 0.0563(7)  | 0.141(4)  |
| F(13) | -0.0395(4) | 0.4385(2) | 0.1259(7)  | 0.112(3)  |
| F(14) | -0.1259(6) | 0.4420(2) | 0.0260(5)  | 0.122(4)  |
| F(15) | -0.1731(4) | 0.4836(1) | 0.1025(5)  | 0.093(2)  |
| F(16) | -0.0849(4) | 0.4798(2) | 0.2040(6)  | 0.104(3)  |
| F(17) | 0.3697(2)  | 0.2610(1) | 0.5347(3)  | 0.045(1)  |
| F(18) | 0.3022(2)  | 0.2373(1) | 0.4315(3)  | 0.044(1)  |
| F(19) | 0.2957(2)  | 0.2900(1) | 0.4535(3)  | 0.040(1)  |
| F(20) | 0.2773(2)  | 0.2823(1) | 0.6041(3)  | 0.043(1)  |
| F(21) | 0.2848(2)  | 0.2296(1) | 0.5828(3)  | 0.046(1)  |
| F(22) | -0.0297(2) | 0.2222(2) | 0.7298(3)  | 0.058(2)  |
| F(23) | -0.0408(2) | 0.2600(1) | 0.6255(3)  | 0.047(1)  |
| F(24) | -0.0201(2) | 0.2088(1) | 0.5841(3)  | 0.047(1)  |

|       |            |            |            |           |
|-------|------------|------------|------------|-----------|
| F(25) | 0.0747(2)  | 0.2079(1)  | 0.6785(3)  | 0.041(1)  |
| F(26) | 0.0535(2)  | 0.2588(1)  | 0.7194(3)  | 0.045(1)  |
| F(27) | 0.2966(9)  | 0.4976(3)  | 0.6963(8)  | 0.234(9)  |
| F(28) | 0.1908(6)  | 0.4710(2)  | 0.6838(7)  | 0.133(4)  |
| F(29) | 0.2658(7)  | 0.4768(2)  | 0.5627(7)  | 0.144(5)  |
| F(30) | 0.3572(7)  | 0.4570(3)  | 0.6434(7)  | 0.170(6)  |
| F(31) | 0.2857(8)  | 0.4506(3)  | 0.7654(7)  | 0.193(7)  |
| F(32) | 0.0732(3)  | 0.3289(1)  | 0.7669(4)  | 0.059(1)  |
| F(33) | 0.0735(3)  | 0.3790(1)  | 0.7210(4)  | 0.050(1)  |
| F(34) | 0.1630(3)  | 0.3595(2)  | 0.8062(3)  | 0.064(2)  |
| F(35) | 0.1766(3)  | 0.3195(1)  | 0.7041(4)  | 0.058(1)  |
| F(36) | 0.0881(2)  | 0.3390(1)  | 0.6195(3)  | 0.047(1)  |
| F(37) | 0.1457(3)  | 0.4783(1)  | -0.0944(4) | 0.056(1)  |
| F(38) | 0.0959(3)  | 0.4390(1)  | -0.1701(3) | 0.047(1)  |
| F(39) | 0.1926(2)  | 0.4305(1)  | -0.0841(4) | 0.049(1)  |
| F(40) | 0.1370(3)  | 0.4524(1)  | 0.0370(3)  | 0.047(1)  |
| F(41) | 0.0406(3)  | 0.4607(1)  | -0.0502(4) | 0.047(1)  |
| F(42) | -0.1634(2) | 0.3399(1)  | -0.1351(3) | 0.049(1)  |
| F(43) | -0.0573(2) | 0.3176(1)  | -0.1228(3) | 0.043(1)  |
| F(44) | -0.0710(3) | 0.3654(1)  | -0.1918(3) | 0.049(1)  |
| F(45) | -0.1280(2) | 0.3835(1)  | -0.0675(3) | 0.047(1)  |
| F(46) | -0.1138(2) | 0.3362(1)  | 0.0016(3)  | 0.041(1)  |
| P(1)  | -0.0144(1) | 0.3413(1)  | 0.3268(1)  | 0.029(1)  |
| P(2)  | 0.1328(1)  | 0.3696(1)  | 0.3114(1)  | 0.032(1)  |
| S(1A) | -0.1190(1) | 0.3589(1)  | 0.4613(2)  | 0.036(1)  |
| S(1B) | -0.0649(7) | 0.3753(4)  | 0.4756(10) | 0.069(4)  |
| S(3)  | -0.3172(1) | 0.4402(1)  | 0.3746(2)  | 0.058(1)  |
| S(2A) | 0.0916(2)  | 0.4294(1)  | 0.3878(3)  | 0.068(1)  |
| S(2B) | 0.1563(11) | 0.4310(4)  | 0.3799(12) | 0.082(5)  |
| S(4)  | -0.1079(2) | 0.4601(1)  | 0.1158(3)  | 0.087(1)  |
| S(5)  | 0.2868(1)  | 0.2595(1)  | 0.5178(1)  | 0.033(1)  |
| S(6)  | 0.0186(1)  | 0.2345(1)  | 0.6485(1)  | 0.039(1)  |
| S(7)  | 0.2751(3)  | 0.4630(1)  | 0.6628(3)  | 0.145(2)  |
| S(8)  | 0.1270(1)  | 0.3501(1)  | 0.7103(1)  | 0.040(1)  |
| S(9)  | 0.1155(1)  | 0.4446(1)  | -0.0650(1) | 0.040(1)  |
| S(10) | -0.0899(1) | 0.3512(1)  | -0.0941(1) | 0.037(1)  |
| Cl(1) | 0.3225(15) | 0.6421(7)  | -0.026(2)  | 0.180(10) |
| Cl(2) | 0.336(3)   | 0.6082(14) | 0.027(3)   | 0.304(19) |
| Cl(3) | 0.1011(8)  | 0.5567(4)  | 0.4146(11) | 0.122(4)  |



|        |            |           |            |           |
|--------|------------|-----------|------------|-----------|
| Cl(4)  | 0.0986(12) | 0.5123(5) | 0.5210(15) | 0.113(6)  |
| Cl(5)  | 0.6299(6)  | 0.3380(3) | 0.4771(8)  | 0.095(3)  |
| Cl(6)  | 0.6318(11) | 0.3333(5) | 0.5244(15) | 0.175(7)  |
| Cl(7)  | 0.6658(7)  | 0.3332(3) | 0.6724(9)  | 0.113(4)  |
| Cl(8)  | 0.6984(12) | 0.3277(5) | 0.6874(14) | 0.137(6)  |
| Cl(9)  | 0.2268(11) | 0.5852(5) | 0.7243(15) | 0.152(6)  |
| Cl(10) | 0.0796(9)  | 0.5422(4) | 0.7731(12) | 0.117(4)  |
| Cl(11) | 0.1244(9)  | 0.5479(4) | 0.7886(11) | 0.111(4)  |
| Cl(12) | 0.1749(16) | 0.5665(7) | 0.680(2)   | 0.202(10) |

---

**Bond lengths [Å] and angles [°].**

---

|             |           |             |           |
|-------------|-----------|-------------|-----------|
| C(1)-F(2)   | 1.273(17) | C(1)-F(1)   | 1.325(15) |
| C(1)-F(3)   | 1.365(17) | C(1)-S(1A)  | 1.836(13) |
| C(1)-S(1B)  | 2.03(2)   | C(2)-F(6)   | 1.21(3)   |
| C(2)-F(4)   | 1.25(3)   | C(2)-F(5)   | 1.26(3)   |
| C(2)-S(2B)  | 1.68(3)   | C(2)-S(2A)  | 1.89(3)   |
| C(3)-C(4)   | 1.359(10) | C(3)-O(1)   | 1.410(8)  |
| C(3)-C(12)  | 1.430(10) | C(4)-C(5)   | 1.439(10) |
| C(4)-C(20)  | 1.488(10) | C(5)-C(6)   | 1.405(10) |
| C(5)-C(10)  | 1.437(10) | C(6)-C(7)   | 1.389(10) |
| C(7)-C(8)   | 1.422(11) | C(8)-C(9)   | 1.365(11) |
| C(9)-C(10)  | 1.433(10) | C(10)-C(11) | 1.388(10) |
| C(11)-C(12) | 1.386(10) | C(12)-C(13) | 1.474(10) |
| C(13)-C(18) | 1.390(11) | C(13)-C(14) | 1.415(11) |
| C(14)-C(15) | 1.370(12) | C(15)-C(16) | 1.382(12) |
| C(15)-S(3)  | 1.817(8)  | C(16)-C(17) | 1.396(13) |
| C(17)-C(18) | 1.387(12) | C(17)-S(4)  | 1.788(9)  |
| C(19)-C(20) | 1.372(9)  | C(19)-O(2)  | 1.413(8)  |
| C(19)-C(28) | 1.418(9)  | C(20)-C(21) | 1.432(10) |
| C(21)-C(22) | 1.405(10) | C(21)-C(26) | 1.427(10) |
| C(22)-C(23) | 1.372(10) | C(23)-C(24) | 1.410(11) |
| C(24)-C(25) | 1.350(11) | C(25)-C(26) | 1.414(10) |
| C(26)-C(27) | 1.427(10) | C(27)-C(28) | 1.361(10) |
| C(28)-C(29) | 1.509(9)  | C(29)-C(30) | 1.383(10) |
| C(29)-C(34) | 1.388(10) | C(30)-C(31) | 1.389(10) |

|             |           |              |           |
|-------------|-----------|--------------|-----------|
| C(31)-C(32) | 1.397(10) | C(31)-S(5)   | 1.801(7)  |
| C(32)-C(33) | 1.390(10) | C(33)-C(34)  | 1.365(10) |
| C(33)-S(6)  | 1.798(7)  | C(35)-C(36)  | 1.385(10) |
| C(35)-C(44) | 1.403(10) | C(35)-O(3)   | 1.420(8)  |
| C(36)-C(37) | 1.425(10) | C(36)-C(52)  | 1.488(10) |
| C(37)-C(42) | 1.424(11) | C(37)-C(38)  | 1.425(11) |
| C(38)-C(39) | 1.375(11) | C(39)-C(40)  | 1.388(12) |
| C(40)-C(41) | 1.348(12) | C(41)-C(42)  | 1.420(11) |
| C(42)-C(43) | 1.404(12) | C(43)-C(44)  | 1.392(11) |
| C(44)-C(45) | 1.473(11) | C(45)-C(46)  | 1.368(12) |
| C(45)-C(50) | 1.432(11) | C(46)-C(47)  | 1.409(13) |
| C(47)-C(48) | 1.406(14) | C(47)-S(7)   | 1.795(10) |
| C(48)-C(49) | 1.377(12) | C(49)-C(50)  | 1.390(11) |
| C(49)-S(8)  | 1.793(8)  | C(51)-C(52)  | 1.385(10) |
| C(51)-O(4)  | 1.408(9)  | C(51)-C(60)  | 1.420(10) |
| C(52)-C(53) | 1.414(11) | C(53)-C(54)  | 1.425(10) |
| C(53)-C(58) | 1.435(10) | C(54)-C(55)  | 1.406(12) |
| C(55)-C(56) | 1.404(11) | C(56)-C(57)  | 1.363(11) |
| C(57)-C(58) | 1.431(10) | C(58)-C(59)  | 1.420(10) |
| C(59)-C(60) | 1.350(10) | C(60)-C(61)  | 1.500(10) |
| C(61)-C(66) | 1.385(10) | C(61)-C(62)  | 1.394(10) |
| C(62)-C(63) | 1.381(10) | C(63)-C(64)  | 1.386(11) |
| C(63)-S(9)  | 1.813(7)  | C(64)-C(65)  | 1.398(10) |
| C(65)-C(66) | 1.406(10) | C(65)-S(10)  | 1.817(7)  |
| C(67)-C(68) | 1.89(8)   | C(68)-Cl(10) | 2.10(5)   |
| C(69)-C(71) | 1.74(5)   | C(70)-C(71)  | 1.46(3)   |
| C(71)-C(72) | 1.46(3)   | C(72)-C(73)  | 1.48(3)   |
| C(72)-C(96) | 2.00(6)   | C(73)-C(78)  | 1.69(3)   |
| C(73)-C(96) | 1.70(6)   | C(74)-C(81)  | 1.17(4)   |
| C(74)-Cl(6) | 1.42(3)   | C(74)-C(99)  | 1.54(11)  |
| C(74)-Cl(5) | 1.78(3)   | C(74)-Cl(7)  | 1.79(4)   |
| C(74)-Cl(8) | 1.95(4)   | C(75)-C(76)  | 1.82(12)  |
| C(75)-C(87) | 1.89(16)  | C(76)-C(87)  | 0.96(16)  |
| C(77)-Cl(1) | 0.68(5)   | C(77)-Cl(2)  | 1.34(6)   |
| C(78)-C(96) | 1.34(5)   | C(79)-C(84)  | 1.32(6)   |
| C(80)-C(86) | 1.32(10)  | C(80)-C(81)  | 1.72(5)   |
| C(81)-Cl(7) | 1.47(3)   | C(81)-Cl(6)  | 1.64(4)   |
| C(81)-Cl(8) | 1.91(4)   | C(81)-Cl(5)  | 2.09(3)   |
| C(82)-C(85) | 1.52(7)   | C(82)-C(83)  | 1.68(7)   |

|             |           |             |           |
|-------------|-----------|-------------|-----------|
| C(82)-C(89) | 1.90(9)   | C(83)-C(88) | 1.09(8)   |
| C(83)-C(85) | 1.17(9)   | C(83)-C(89) | 1.32(9)   |
| C(83)-C(84) | 1.81(9)   | C(84)-C(88) | 1.29(6)   |
| C(85)-C(88) | 1.23(7)   | C(85)-C(90) | 1.91(9)   |
| C(86)-Cl(5) | 2.26(10)  | C(91)-C(94) | 1.32(10)  |
| C(91)-C(92) | 1.64(11)  | C(91)-C(97) | 1.97(13)  |
| C(91)-C(95) | 1.97(11)  | C(92)-C(94) | 1.38(8)   |
| C(92)-C(98) | 1.47(13)  | C(92)-C(95) | 1.52(8)   |
| C(92)-C(93) | 1.95(11)  | C(93)-C(98) | 1.70(14)  |
| C(95)-C(98) | 1.06(12)  | C(95)-C(97) | 1.30(9)   |
| C(95)-Cl(2) | 1.33(6)   | C(97)-Cl(2) | 2.12(10)  |
| C(98)-Cl(2) | 1.28(13)  | C(99)-Cl(6) | 1.74(10)  |
| C(99)-Cl(5) | 2.08(10)  | N(1)-P(2)   | 1.531(6)  |
| N(1)-P(1)   | 1.543(6)  | N(2A)-S(1A) | 1.545(7)  |
| N(2A)-P(1)  | 1.573(6)  | N(2B)-S(1B) | 1.183(15) |
| N(2B)-P(1)  | 1.573(6)  | N(3A)-S(2A) | 1.445(9)  |
| N(3A)-P(2)  | 1.553(8)  | N(3B)-S(2B) | 1.256(17) |
| N(3B)-P(2)  | 1.553(8)  | O(1)-P(1)   | 1.589(5)  |
| O(2)-P(1)   | 1.604(5)  | O(3)-P(2)   | 1.575(5)  |
| O(4)-P(2)   | 1.600(5)  | O(5)-S(1A)  | 1.447(8)  |
| O(6)-S(1A)  | 1.434(7)  | O(7)-S(2A)  | 1.615(16) |
| O(8)-S(2A)  | 1.386(18) | F(7)-S(3)   | 1.576(6)  |
| F(8)-S(3)   | 1.596(7)  | F(9)-S(3)   | 1.570(7)  |
| F(10)-S(3)  | 1.568(7)  | F(11)-S(3)  | 1.577(6)  |
| F(12)-S(4)  | 1.553(7)  | F(13)-S(4)  | 1.575(8)  |
| F(14)-S(4)  | 1.539(10) | F(15)-S(4)  | 1.580(7)  |
| F(16)-S(4)  | 1.578(9)  | F(17)-S(5)  | 1.577(4)  |
| F(18)-S(5)  | 1.583(5)  | F(19)-S(5)  | 1.584(5)  |
| F(20)-S(5)  | 1.579(5)  | F(21)-S(5)  | 1.564(5)  |
| F(22)-S(6)  | 1.570(5)  | F(23)-S(6)  | 1.576(5)  |
| F(24)-S(6)  | 1.596(5)  | F(25)-S(6)  | 1.590(5)  |
| F(26)-S(6)  | 1.583(5)  | F(27)-S(7)  | 1.578(8)  |
| F(28)-S(7)  | 1.645(12) | F(29)-S(7)  | 1.570(12) |
| F(30)-S(7)  | 1.587(14) | F(31)-S(7)  | 1.583(14) |
| F(32)-S(8)  | 1.571(5)  | F(33)-S(8)  | 1.577(5)  |
| F(34)-S(8)  | 1.592(5)  | F(35)-S(8)  | 1.583(5)  |
| F(36)-S(8)  | 1.573(5)  | F(37)-S(9)  | 1.575(5)  |
| F(38)-S(9)  | 1.581(5)  | F(39)-S(9)  | 1.587(5)  |
| F(40)-S(9)  | 1.565(5)  | F(41)-S(9)  | 1.573(5)  |

|                   |           |                   |           |
|-------------------|-----------|-------------------|-----------|
| F(42)-S(10)       | 1.574(5)  | F(43)-S(10)       | 1.583(5)  |
| F(44)-S(10)       | 1.573(5)  | F(45)-S(10)       | 1.576(5)  |
| F(46)-S(10)       | 1.584(5)  | Cl(1)-Cl(2)       | 1.63(6)   |
| Cl(3)-Cl(4)       | 2.41(3)   | Cl(5)-Cl(6)       | 0.71(2)   |
| Cl(6)-Cl(7)       | 2.24(3)   | Cl(7)-Cl(8)       | 0.69(2)   |
| Cl(9)-Cl(12)      | 1.41(3)   | Cl(10)-Cl(11)     | 0.901(18) |
| Cl(10)-Cl(12)     | 2.46(3)   | Cl(11)-Cl(12)     | 2.00(3)   |
| F(2)-C(1)-F(1)    | 113.0(14) | F(2)-C(1)-F(3)    | 110.8(12) |
| F(1)-C(1)-F(3)    | 108.4(11) | F(2)-C(1)-S(1A)   | 109.9(9)  |
| F(1)-C(1)-S(1A)   | 107.5(9)  | F(3)-C(1)-S(1A)   | 107.0(10) |
| F(6)-C(2)-F(4)    | 115(2)    | F(6)-C(2)-F(5)    | 114(2)    |
| F(4)-C(2)-F(5)    | 111(2)    | F(6)-C(2)-S(2A)   | 107(2)    |
| F(4)-C(2)-S(2A)   | 106(2)    | F(5)-C(2)-S(2A)   | 102(2)    |
| C(4)-C(3)-O(1)    | 119.5(6)  | C(4)-C(3)-C(12)   | 123.6(7)  |
| O(1)-C(3)-C(12)   | 117.0(6)  | C(3)-C(4)-C(5)    | 119.7(6)  |
| C(3)-C(4)-C(20)   | 120.2(6)  | C(5)-C(4)-C(20)   | 119.9(6)  |
| C(6)-C(5)-C(10)   | 119.4(6)  | C(6)-C(5)-C(4)    | 123.2(6)  |
| C(10)-C(5)-C(4)   | 117.3(6)  | C(7)-C(6)-C(5)    | 120.6(7)  |
| C(6)-C(7)-C(8)    | 120.6(7)  | C(9)-C(8)-C(7)    | 119.8(7)  |
| C(8)-C(9)-C(10)   | 121.4(7)  | C(11)-C(10)-C(9)  | 121.6(6)  |
| C(11)-C(10)-C(5)  | 120.1(6)  | C(9)-C(10)-C(5)   | 118.2(6)  |
| C(12)-C(11)-C(10) | 123.0(6)  | C(11)-C(12)-C(3)  | 116.2(7)  |
| C(11)-C(12)-C(13) | 120.3(7)  | C(3)-C(12)-C(13)  | 123.5(6)  |
| C(18)-C(13)-C(14) | 118.5(7)  | C(18)-C(13)-C(12) | 121.3(7)  |
| C(14)-C(13)-C(12) | 120.1(7)  | C(15)-C(14)-C(13) | 119.3(8)  |
| C(14)-C(15)-C(16) | 122.8(8)  | C(14)-C(15)-S(3)  | 118.9(7)  |
| C(16)-C(15)-S(3)  | 118.3(6)  | C(15)-C(16)-C(17) | 117.7(8)  |
| C(18)-C(17)-C(16) | 120.9(8)  | C(18)-C(17)-S(4)  | 120.4(7)  |
| C(16)-C(17)-S(4)  | 118.7(7)  | C(17)-C(18)-C(13) | 120.7(8)  |
| C(20)-C(19)-O(2)  | 119.0(6)  | C(20)-C(19)-C(28) | 123.6(6)  |
| O(2)-C(19)-C(28)  | 117.4(5)  | C(19)-C(20)-C(21) | 117.8(6)  |
| C(19)-C(20)-C(4)  | 119.4(6)  | C(21)-C(20)-C(4)  | 122.7(6)  |
| C(22)-C(21)-C(26) | 118.2(6)  | C(22)-C(21)-C(20) | 122.5(6)  |
| C(26)-C(21)-C(20) | 119.3(6)  | C(23)-C(22)-C(21) | 121.5(7)  |
| C(22)-C(23)-C(24) | 119.3(7)  | C(25)-C(24)-C(23) | 121.3(7)  |
| C(24)-C(25)-C(26) | 120.4(7)  | C(25)-C(26)-C(27) | 121.5(6)  |
| C(25)-C(26)-C(21) | 119.2(6)  | C(27)-C(26)-C(21) | 119.3(6)  |
| C(28)-C(27)-C(26) | 121.2(6)  | C(27)-C(28)-C(19) | 118.3(6)  |

|                   |          |                   |          |
|-------------------|----------|-------------------|----------|
| C(27)-C(28)-C(29) | 120.2(6) | C(19)-C(28)-C(29) | 120.9(6) |
| C(30)-C(29)-C(34) | 119.1(6) | C(30)-C(29)-C(28) | 121.4(6) |
| C(34)-C(29)-C(28) | 118.9(6) | C(29)-C(30)-C(31) | 120.0(6) |
| C(30)-C(31)-C(32) | 120.8(6) | C(30)-C(31)-S(5)  | 121.1(5) |
| C(32)-C(31)-S(5)  | 118.1(5) | C(33)-C(32)-C(31) | 118.3(7) |
| C(34)-C(33)-C(32) | 120.8(7) | C(34)-C(33)-S(6)  | 120.7(5) |
| C(32)-C(33)-S(6)  | 118.4(6) | C(33)-C(34)-C(29) | 121.2(6) |
| C(36)-C(35)-C(44) | 123.3(6) | C(36)-C(35)-O(3)  | 118.2(6) |
| C(44)-C(35)-O(3)  | 118.4(6) | C(35)-C(36)-C(37) | 118.8(7) |
| C(35)-C(36)-C(52) | 119.4(6) | C(37)-C(36)-C(52) | 121.5(7) |
| C(42)-C(37)-C(38) | 119.1(7) | C(42)-C(37)-C(36) | 118.5(7) |
| C(38)-C(37)-C(36) | 122.2(7) | C(39)-C(38)-C(37) | 119.3(8) |
| C(38)-C(39)-C(40) | 121.2(8) | C(41)-C(40)-C(39) | 120.8(8) |
| C(40)-C(41)-C(42) | 121.1(8) | C(43)-C(42)-C(41) | 121.8(7) |
| C(43)-C(42)-C(37) | 119.9(7) | C(41)-C(42)-C(37) | 118.3(7) |
| C(44)-C(43)-C(42) | 121.8(7) | C(43)-C(44)-C(35) | 117.3(7) |
| C(43)-C(44)-C(45) | 119.0(7) | C(35)-C(44)-C(45) | 123.6(7) |
| C(46)-C(45)-C(50) | 119.7(8) | C(46)-C(45)-C(44) | 120.4(7) |
| C(50)-C(45)-C(44) | 119.9(7) | C(45)-C(46)-C(47) | 120.4(9) |
| C(48)-C(47)-C(46) | 120.5(9) | C(48)-C(47)-S(7)  | 119.8(7) |
| C(46)-C(47)-S(7)  | 119.7(8) | C(49)-C(48)-C(47) | 118.4(8) |
| C(48)-C(49)-C(50) | 122.3(8) | C(48)-C(49)-S(8)  | 119.5(6) |
| C(50)-C(49)-S(8)  | 118.2(6) | C(49)-C(50)-C(45) | 118.7(7) |
| C(52)-C(51)-O(4)  | 118.0(6) | C(52)-C(51)-C(60) | 123.1(7) |
| O(4)-C(51)-C(60)  | 118.8(6) | C(51)-C(52)-C(53) | 117.9(6) |
| C(51)-C(52)-C(36) | 119.7(7) | C(53)-C(52)-C(36) | 122.4(6) |
| C(52)-C(53)-C(54) | 121.5(7) | C(52)-C(53)-C(58) | 119.5(6) |
| C(54)-C(53)-C(58) | 118.9(7) | C(55)-C(54)-C(53) | 120.1(7) |
| C(56)-C(55)-C(54) | 119.7(7) | C(57)-C(56)-C(55) | 121.6(7) |
| C(56)-C(57)-C(58) | 120.5(7) | C(59)-C(58)-C(57) | 122.8(6) |
| C(59)-C(58)-C(53) | 118.2(6) | C(57)-C(58)-C(53) | 119.0(7) |
| C(60)-C(59)-C(58) | 122.9(7) | C(59)-C(60)-C(51) | 117.4(6) |
| C(59)-C(60)-C(61) | 121.5(6) | C(51)-C(60)-C(61) | 120.8(6) |
| C(66)-C(61)-C(62) | 120.3(7) | C(66)-C(61)-C(60) | 120.7(6) |
| C(62)-C(61)-C(60) | 118.7(6) | C(63)-C(62)-C(61) | 119.9(6) |
| C(62)-C(63)-C(64) | 122.3(6) | C(62)-C(63)-S(9)  | 118.9(5) |
| C(64)-C(63)-S(9)  | 118.7(5) | C(63)-C(64)-C(65) | 116.5(7) |
| C(64)-C(65)-C(66) | 123.0(7) | C(64)-C(65)-S(10) | 117.2(5) |
| C(66)-C(65)-S(10) | 119.7(5) | C(61)-C(66)-C(65) | 117.9(7) |

|                    |           |                   |           |
|--------------------|-----------|-------------------|-----------|
| C(67)-C(68)-Cl(10) | 96(3)     | C(70)-C(71)-C(72) | 116(3)    |
| C(70)-C(71)-C(69)  | 115(3)    | C(72)-C(71)-C(69) | 102(3)    |
| C(71)-C(72)-C(73)  | 117(2)    | C(71)-C(72)-C(96) | 173(3)    |
| C(73)-C(72)-C(96)  | 56(2)     | C(72)-C(73)-C(78) | 121(2)    |
| C(72)-C(73)-C(96)  | 78(2)     | C(78)-C(73)-C(96) | 46(2)     |
| C(81)-C(74)-Cl(6)  | 78(3)     | C(81)-C(74)-C(99) | 135(5)    |
| Cl(6)-C(74)-C(99)  | 72(4)     | C(81)-C(74)-Cl(5) | 88(3)     |
| C(99)-C(74)-Cl(5)  | 77(4)     | C(81)-C(74)-Cl(7) | 55(2)     |
| Cl(6)-C(74)-Cl(7)  | 87(2)     | C(99)-C(74)-Cl(7) | 90(4)     |
| Cl(5)-C(74)-Cl(7)  | 109.3(19) | C(81)-C(74)-Cl(8) | 71(2)     |
| Cl(6)-C(74)-Cl(8)  | 105(2)    | C(99)-C(74)-Cl(8) | 84(4)     |
| Cl(5)-C(74)-Cl(8)  | 127(2)    | C(87)-C(76)-C(75) | 79(10)    |
| Cl(1)-C(77)-Cl(2)  | 102(6)    | C(96)-C(78)-C(73) | 67(3)     |
| C(86)-C(80)-C(81)  | 93(6)     | C(74)-C(81)-Cl(7) | 85(3)     |
| C(74)-C(81)-Cl(6)  | 58(2)     | Cl(7)-C(81)-Cl(6) | 91(2)     |
| C(74)-C(81)-C(80)  | 145(4)    | Cl(7)-C(81)-C(80) | 121(3)    |
| Cl(6)-C(81)-C(80)  | 96(2)     | C(74)-C(81)-Cl(8) | 74(2)     |
| Cl(6)-C(81)-Cl(8)  | 97.5(19)  | C(80)-C(81)-Cl(8) | 137(3)    |
| C(74)-C(81)-Cl(5)  | 58(2)     | Cl(7)-C(81)-Cl(5) | 108.4(19) |
| C(80)-C(81)-Cl(5)  | 90(2)     | Cl(8)-C(81)-Cl(5) | 112.5(17) |
| C(85)-C(82)-C(89)  | 85(4)     | C(88)-C(83)-C(85) | 66(7)     |
| C(88)-C(83)-C(89)  | 150(10)   | C(85)-C(83)-C(89) | 139(10)   |
| C(88)-C(83)-C(82)  | 120(8)    | C(85)-C(83)-C(82) | 62(5)     |
| C(89)-C(83)-C(82)  | 78(6)     | C(88)-C(83)-C(84) | 45(4)     |
| C(85)-C(83)-C(84)  | 108(7)    | C(89)-C(83)-C(84) | 105(7)    |
| C(82)-C(83)-C(84)  | 138(5)    | C(88)-C(84)-C(79) | 144(6)    |
| C(79)-C(84)-C(83)  | 170(6)    | C(83)-C(85)-C(88) | 54(5)     |
| C(83)-C(85)-C(82)  | 76(6)     | C(88)-C(85)-C(82) | 123(5)    |
| C(83)-C(85)-C(90)  | 99(6)     | C(88)-C(85)-C(90) | 123(5)    |
| C(82)-C(85)-C(90)  | 87(4)     | C(80)-C(86)-Cl(5) | 94(6)     |
| C(76)-C(87)-C(75)  | 71(10)    | C(83)-C(88)-C(85) | 60(5)     |
| C(83)-C(88)-C(84)  | 99(7)     | C(85)-C(88)-C(84) | 152(6)    |
| C(83)-C(89)-C(82)  | 60(5)     | C(94)-C(91)-C(92) | 54(5)     |
| C(94)-C(91)-C(97)  | 135(8)    | C(92)-C(91)-C(97) | 81(6)     |
| C(94)-C(91)-C(95)  | 102(7)    | C(92)-C(91)-C(95) | 49(4)     |
| C(94)-C(92)-C(98)  | 146(8)    | C(94)-C(92)-C(95) | 126(6)    |
| C(94)-C(92)-C(91)  | 51(5)     | C(98)-C(92)-C(91) | 114(7)    |
| C(95)-C(92)-C(91)  | 77(5)     | C(94)-C(92)-C(93) | 98(5)     |
| C(98)-C(92)-C(93)  | 58(6)     | C(95)-C(92)-C(93) | 89(4)     |

|                   |           |                   |           |
|-------------------|-----------|-------------------|-----------|
| C(91)-C(92)-C(93) | 113(6)    | C(98)-C(93)-C(92) | 47(5)     |
| C(91)-C(94)-C(92) | 75(6)     | C(98)-C(95)-C(97) | 167(10)   |
| C(98)-C(95)-Cl(2) | 64(8)     | C(97)-C(95)-Cl(2) | 108(6)    |
| C(98)-C(95)-C(92) | 67(8)     | C(97)-C(95)-C(92) | 113(6)    |
| Cl(2)-C(95)-C(92) | 117(5)    | C(98)-C(95)-C(91) | 115(9)    |
| C(97)-C(95)-C(91) | 70(5)     | Cl(2)-C(95)-C(91) | 165(5)    |
| C(92)-C(95)-C(91) | 54(4)     | C(78)-C(96)-C(73) | 66(3)     |
| C(78)-C(96)-C(72) | 110(4)    | C(73)-C(96)-C(72) | 46.1(17)  |
| C(95)-C(97)-C(91) | 71(6)     | C(91)-C(97)-Cl(2) | 106(6)    |
| C(95)-C(98)-Cl(2) | 68(9)     | C(95)-C(98)-C(92) | 72(8)     |
| Cl(2)-C(98)-C(92) | 123(10)   | C(95)-C(98)-C(93) | 123(10)   |
| Cl(2)-C(98)-C(93) | 161(10)   | C(92)-C(98)-C(93) | 75(8)     |
| C(74)-C(99)-Cl(6) | 51(3)     | C(74)-C(99)-Cl(5) | 57(4)     |
| P(2)-N(1)-P(1)    | 157.1(5)  | S(1A)-N(2A)-P(1)  | 133.1(5)  |
| S(1B)-N(2B)-P(1)  | 171.2(9)  | S(2A)-N(3A)-P(2)  | 142.2(7)  |
| S(2B)-N(3B)-P(2)  | 164.4(12) | C(3)-O(1)-P(1)    | 120.9(4)  |
| C(19)-O(2)-P(1)   | 116.1(4)  | C(35)-O(3)-P(2)   | 119.2(5)  |
| C(51)-O(4)-P(2)   | 115.8(4)  | N(1)-P(1)-N(2B)   | 113.6(4)  |
| N(1)-P(1)-N(2A)   | 113.6(4)  | N(1)-P(1)-O(1)    | 106.3(3)  |
| N(2B)-P(1)-O(1)   | 112.5(4)  | N(2A)-P(1)-O(1)   | 112.5(4)  |
| N(1)-P(1)-O(2)    | 112.2(3)  | N(2B)-P(1)-O(2)   | 107.9(3)  |
| N(2A)-P(1)-O(2)   | 107.9(3)  | O(1)-P(1)-O(2)    | 104.1(3)  |
| N(1)-P(2)-N(3B)   | 123.0(4)  | N(1)-P(2)-N(3A)   | 123.0(4)  |
| N(1)-P(2)-O(3)    | 106.3(3)  | N(3B)-P(2)-O(3)   | 107.3(4)  |
| N(3A)-P(2)-O(3)   | 107.3(4)  | N(1)-P(2)-O(4)    | 110.6(3)  |
| N(3B)-P(2)-O(4)   | 104.0(4)  | N(3A)-P(2)-O(4)   | 104.0(4)  |
| O(3)-P(2)-O(4)    | 104.3(3)  | O(6)-S(1A)-O(5)   | 117.8(5)  |
| O(6)-S(1A)-N(2A)  | 113.8(4)  | O(5)-S(1A)-N(2A)  | 110.9(5)  |
| O(6)-S(1A)-C(1)   | 105.4(6)  | O(5)-S(1A)-C(1)   | 103.4(6)  |
| N(2A)-S(1A)-C(1)  | 103.6(5)  | N(2B)-S(1B)-C(1)  | 109.1(12) |
| F(10)-S(3)-F(9)   | 90.3(4)   | F(10)-S(3)-F(7)   | 87.9(4)   |
| F(9)-S(3)-F(7)    | 87.8(3)   | F(10)-S(3)-F(11)  | 90.5(4)   |
| F(9)-S(3)-F(11)   | 175.9(3)  | F(7)-S(3)-F(11)   | 88.2(3)   |
| F(10)-S(3)-F(8)   | 176.0(3)  | F(9)-S(3)-F(8)    | 89.8(4)   |
| F(7)-S(3)-F(8)    | 88.0(4)   | F(11)-S(3)-F(8)   | 89.1(4)   |
| F(10)-S(3)-C(15)  | 92.1(4)   | F(9)-S(3)-C(15)   | 91.9(4)   |
| F(7)-S(3)-C(15)   | 179.7(4)  | F(11)-S(3)-C(15)  | 92.1(3)   |
| F(8)-S(3)-C(15)   | 91.9(4)   | O(8)-S(2A)-N(3A)  | 119.4(9)  |
| O(8)-S(2A)-O(7)   | 123.2(10) | N(3A)-S(2A)-O(7)  | 110.7(6)  |

|                  |           |                  |           |
|------------------|-----------|------------------|-----------|
| O(8)-S(2A)-C(2)  | 103.3(13) | N(3A)-S(2A)-C(2) | 96.7(8)   |
| O(7)-S(2A)-C(2)  | 95.5(9)   | N(3B)-S(2B)-C(2) | 117.3(16) |
| F(14)-S(4)-F(12) | 87.7(5)   | F(14)-S(4)-F(13) | 88.7(5)   |
| F(12)-S(4)-F(13) | 88.8(4)   | F(14)-S(4)-F(16) | 175.8(5)  |
| F(12)-S(4)-F(16) | 88.3(5)   | F(13)-S(4)-F(16) | 90.0(5)   |
| F(14)-S(4)-F(15) | 91.8(5)   | F(12)-S(4)-F(15) | 87.2(4)   |
| F(13)-S(4)-F(15) | 176.0(4)  | F(16)-S(4)-F(15) | 89.2(4)   |
| F(14)-S(4)-C(17) | 92.2(4)   | F(12)-S(4)-C(17) | 179.4(5)  |
| F(13)-S(4)-C(17) | 91.7(4)   | F(16)-S(4)-C(17) | 91.8(4)   |
| F(15)-S(4)-C(17) | 92.2(4)   | F(21)-S(5)-F(17) | 87.9(3)   |
| F(21)-S(5)-F(20) | 90.2(3)   | F(17)-S(5)-F(20) | 88.0(2)   |
| F(21)-S(5)-F(18) | 90.6(3)   | F(17)-S(5)-F(18) | 88.0(2)   |
| F(20)-S(5)-F(18) | 175.8(3)  | F(21)-S(5)-F(19) | 175.2(2)  |
| F(17)-S(5)-F(19) | 87.3(3)   | F(20)-S(5)-F(19) | 89.5(3)   |
| F(18)-S(5)-F(19) | 89.3(3)   | F(21)-S(5)-C(31) | 92.5(3)   |
| F(17)-S(5)-C(31) | 179.5(3)  | F(20)-S(5)-C(31) | 92.4(3)   |
| F(18)-S(5)-C(31) | 91.7(3)   | F(19)-S(5)-C(31) | 92.3(3)   |
| F(22)-S(6)-F(23) | 88.3(3)   | F(22)-S(6)-F(26) | 87.8(3)   |
| F(23)-S(6)-F(26) | 89.9(3)   | F(22)-S(6)-F(25) | 87.1(3)   |
| F(23)-S(6)-F(25) | 175.4(3)  | F(26)-S(6)-F(25) | 89.7(3)   |
| F(22)-S(6)-F(24) | 87.4(3)   | F(23)-S(6)-F(24) | 90.5(3)   |
| F(26)-S(6)-F(24) | 175.2(3)  | F(25)-S(6)-F(24) | 89.6(3)   |
| F(22)-S(6)-C(33) | 179.2(4)  | F(23)-S(6)-C(33) | 92.5(3)   |
| F(26)-S(6)-C(33) | 92.1(3)   | F(25)-S(6)-C(33) | 92.0(3)   |
| F(24)-S(6)-C(33) | 92.6(3)   | F(29)-S(7)-F(27) | 88.5(6)   |
| F(29)-S(7)-F(31) | 177.2(5)  | F(27)-S(7)-F(31) | 88.7(7)   |
| F(29)-S(7)-F(30) | 90.1(6)   | F(27)-S(7)-F(30) | 87.0(7)   |
| F(31)-S(7)-F(30) | 89.6(8)   | F(29)-S(7)-F(28) | 89.4(7)   |
| F(27)-S(7)-F(28) | 90.3(7)   | F(31)-S(7)-F(28) | 90.8(6)   |
| F(30)-S(7)-F(28) | 177.2(5)  | F(29)-S(7)-C(47) | 92.3(5)   |
| F(27)-S(7)-C(47) | 178.1(10) | F(31)-S(7)-C(47) | 90.5(5)   |
| F(30)-S(7)-C(47) | 91.3(5)   | F(28)-S(7)-C(47) | 91.4(5)   |
| F(32)-S(8)-F(36) | 88.3(3)   | F(32)-S(8)-F(33) | 88.3(3)   |
| F(36)-S(8)-F(33) | 90.7(3)   | F(32)-S(8)-F(35) | 87.4(3)   |
| F(36)-S(8)-F(35) | 89.3(3)   | F(33)-S(8)-F(35) | 175.7(3)  |
| F(32)-S(8)-F(34) | 87.6(3)   | F(36)-S(8)-F(34) | 175.9(3)  |
| F(33)-S(8)-F(34) | 89.8(3)   | F(35)-S(8)-F(34) | 89.9(3)   |
| F(32)-S(8)-C(49) | 179.6(4)  | F(36)-S(8)-C(49) | 92.0(3)   |
| F(33)-S(8)-C(49) | 91.8(3)   | F(35)-S(8)-C(49) | 92.5(3)   |



|                      |           |                     |           |
|----------------------|-----------|---------------------|-----------|
| F(34)-S(8)-C(49)     | 92.1(3)   | F(40)-S(9)-F(41)    | 90.7(3)   |
| F(40)-S(9)-F(37)     | 88.6(3)   | F(41)-S(9)-F(37)    | 88.7(3)   |
| F(40)-S(9)-F(38)     | 176.2(3)  | F(41)-S(9)-F(38)    | 89.2(3)   |
| F(37)-S(9)-F(38)     | 87.6(3)   | F(40)-S(9)-F(39)    | 90.4(3)   |
| F(41)-S(9)-F(39)     | 176.1(3)  | F(37)-S(9)-F(39)    | 87.6(3)   |
| F(38)-S(9)-F(39)     | 89.4(3)   | F(40)-S(9)-C(63)    | 92.2(3)   |
| F(41)-S(9)-C(63)     | 92.0(3)   | F(37)-S(9)-C(63)    | 178.9(3)  |
| F(38)-S(9)-C(63)     | 91.6(3)   | F(39)-S(9)-C(63)    | 91.7(3)   |
| F(44)-S(10)-F(42)    | 88.4(3)   | F(44)-S(10)-F(45)   | 89.9(3)   |
| F(42)-S(10)-F(45)    | 87.2(3)   | F(44)-S(10)-F(43)   | 90.7(3)   |
| F(42)-S(10)-F(43)    | 88.6(3)   | F(45)-S(10)-F(43)   | 175.8(3)  |
| F(44)-S(10)-F(46)    | 176.3(3)  | F(42)-S(10)-F(46)   | 87.9(3)   |
| F(45)-S(10)-F(46)    | 89.8(3)   | F(43)-S(10)-F(46)   | 89.4(3)   |
| F(44)-S(10)-C(65)    | 91.8(3)   | F(42)-S(10)-C(65)   | 179.0(4)  |
| F(45)-S(10)-C(65)    | 91.8(3)   | F(43)-S(10)-C(65)   | 92.4(3)   |
| F(46)-S(10)-C(65)    | 91.9(3)   | C(77)-Cl(1)-Cl(2)   | 53(5)     |
| C(98)-Cl(2)-C(95)    | 48(6)     | C(98)-Cl(2)-C(77)   | 147(8)    |
| C(95)-Cl(2)-C(77)    | 125(5)    | C(98)-Cl(2)-Cl(1)   | 161(8)    |
| C(95)-Cl(2)-Cl(1)    | 117(4)    | C(98)-Cl(2)-C(97)   | 83(7)     |
| C(77)-Cl(2)-C(97)    | 100(4)    | Cl(1)-Cl(2)-C(97)   | 84(4)     |
| Cl(6)-Cl(5)-C(74)    | 49(2)     | Cl(6)-Cl(5)-C(99)   | 53(3)     |
| C(74)-Cl(5)-C(99)    | 46(3)     | C(99)-Cl(5)-C(81)   | 74(3)     |
| Cl(6)-Cl(5)-C(86)    | 95(4)     | C(74)-Cl(5)-C(86)   | 88(3)     |
| C(99)-Cl(5)-C(86)    | 134(4)    | C(81)-Cl(5)-C(86)   | 61(3)     |
| Cl(5)-Cl(6)-C(74)    | 109(3)    | Cl(5)-Cl(6)-C(81)   | 120(3)    |
| Cl(5)-Cl(6)-C(99)    | 108(4)    | C(74)-Cl(6)-C(99)   | 57(4)     |
| C(81)-Cl(6)-C(99)    | 95(4)     | Cl(5)-Cl(6)-Cl(7)   | 159(3)    |
| C(74)-Cl(6)-Cl(7)    | 53.2(16)  | C(99)-Cl(6)-Cl(7)   | 72(4)     |
| Cl(8)-Cl(7)-C(81)    | 120(3)    | Cl(8)-Cl(7)-C(74)   | 92(3)     |
| Cl(8)-Cl(7)-Cl(6)    | 124(3)    | C(81)-Cl(7)-Cl(6)   | 47.3(14)  |
| Cl(7)-Cl(8)-C(74)    | 67(2)     | Cl(11)-Cl(10)-C(68) | 115(2)    |
| Cl(11)-Cl(10)-Cl(12) | 49.7(16)  | C(68)-Cl(10)-Cl(12) | 69.6(15)  |
| Cl(10)-Cl(11)-Cl(12) | 110(2)    | Cl(9)-Cl(12)-Cl(11) | 100.4(19) |
| Cl(9)-Cl(12)-Cl(10)  | 118.6(19) |                     |           |

---

**Anisotropic displacement parameters (Å<sup>2</sup>).**

The anisotropic displacement factor exponent takes the form:

$$-2\pi^2 [ h^2 a^{*2} U_{11} + \dots + 2 h k a^* b^* U_{12} ].$$

|       | U <sub>11</sub> | U <sub>22</sub> | U <sub>33</sub> | U <sub>23</sub> | U <sub>13</sub> | U <sub>12</sub> |
|-------|-----------------|-----------------|-----------------|-----------------|-----------------|-----------------|
| C(1)  | 0.064(8)        | 0.109(12)       | 0.031(7)        | 0.001(7)        | 0.005(6)        | -0.009(8)       |
| C(2)  | 0.204(17)       | 0.197(17)       | 0.209(17)       | -0.002(7)       | -0.011(7)       | 0.015(7)        |
| C(3)  | 0.031(4)        | 0.026(4)        | 0.024(4)        | 0.004(3)        | -0.002(3)       | 0.000(3)        |
| C(4)  | 0.025(3)        | 0.032(4)        | 0.019(4)        | 0.003(3)        | -0.002(3)       | 0.000(3)        |
| C(5)  | 0.025(3)        | 0.034(4)        | 0.020(4)        | 0.006(3)        | 0.001(3)        | -0.001(3)       |
| C(6)  | 0.034(4)        | 0.039(4)        | 0.019(4)        | 0.002(3)        | 0.003(3)        | -0.001(3)       |
| C(7)  | 0.038(4)        | 0.035(4)        | 0.027(4)        | 0.000(3)        | 0.006(3)        | -0.011(3)       |
| C(8)  | 0.034(4)        | 0.051(5)        | 0.026(4)        | -0.007(3)       | 0.007(3)        | -0.015(4)       |
| C(9)  | 0.026(4)        | 0.047(5)        | 0.019(4)        | -0.004(3)       | 0.006(3)        | -0.006(3)       |
| C(10) | 0.022(3)        | 0.038(4)        | 0.020(4)        | 0.000(3)        | -0.002(3)       | -0.001(3)       |
| C(11) | 0.019(3)        | 0.039(4)        | 0.025(4)        | 0.004(3)        | -0.003(3)       | -0.002(3)       |
| C(12) | 0.030(4)        | 0.036(4)        | 0.024(4)        | 0.000(3)        | 0.000(3)        | 0.002(3)        |
| C(13) | 0.035(4)        | 0.030(4)        | 0.029(4)        | 0.002(3)        | 0.001(3)        | 0.005(3)        |
| C(14) | 0.034(4)        | 0.041(5)        | 0.042(5)        | -0.003(3)       | 0.001(3)        | 0.000(3)        |
| C(15) | 0.039(4)        | 0.038(5)        | 0.052(6)        | -0.006(4)       | 0.003(4)        | 0.002(4)        |
| C(16) | 0.060(6)        | 0.032(4)        | 0.062(6)        | 0.003(4)        | 0.017(5)        | 0.003(4)        |
| C(17) | 0.052(5)        | 0.035(5)        | 0.059(6)        | 0.006(4)        | 0.009(4)        | 0.005(4)        |
| C(18) | 0.047(5)        | 0.036(4)        | 0.040(5)        | 0.003(3)        | 0.006(4)        | 0.009(4)        |
| C(19) | 0.025(3)        | 0.028(4)        | 0.018(3)        | -0.001(3)       | -0.002(3)       | 0.001(3)        |
| C(20) | 0.024(3)        | 0.030(4)        | 0.024(4)        | 0.003(3)        | -0.005(3)       | -0.001(3)       |
| C(21) | 0.026(3)        | 0.027(4)        | 0.028(4)        | 0.004(3)        | -0.004(3)       | -0.003(3)       |
| C(22) | 0.033(4)        | 0.039(4)        | 0.018(4)        | 0.004(3)        | 0.002(3)        | -0.002(3)       |
| C(23) | 0.045(4)        | 0.047(5)        | 0.018(4)        | -0.002(3)       | -0.001(3)       | -0.005(4)       |
| C(24) | 0.034(4)        | 0.046(5)        | 0.030(4)        | -0.008(3)       | 0.010(3)        | 0.000(4)        |
| C(25) | 0.029(4)        | 0.037(4)        | 0.031(4)        | -0.008(3)       | 0.005(3)        | 0.001(3)        |
| C(26) | 0.027(3)        | 0.033(4)        | 0.023(4)        | -0.002(3)       | 0.004(3)        | 0.003(3)        |
| C(27) | 0.032(4)        | 0.028(4)        | 0.025(4)        | 0.003(3)        | -0.007(3)       | 0.002(3)        |
| C(28) | 0.021(3)        | 0.038(4)        | 0.016(4)        | 0.002(3)        | 0.000(2)        | 0.003(3)        |
| C(29) | 0.023(3)        | 0.037(4)        | 0.027(4)        | 0.002(3)        | -0.004(3)       | 0.005(3)        |
| C(30) | 0.026(4)        | 0.036(4)        | 0.024(4)        | 0.003(3)        | -0.002(3)       | 0.003(3)        |
| C(31) | 0.022(3)        | 0.035(4)        | 0.029(4)        | 0.001(3)        | 0.005(3)        | 0.000(3)        |
| C(32) | 0.028(4)        | 0.047(4)        | 0.024(4)        | 0.004(3)        | 0.000(3)        | 0.001(3)        |
| C(33) | 0.024(4)        | 0.041(4)        | 0.028(4)        | 0.000(3)        | 0.003(3)        | 0.003(3)        |

|       |          |          |          |           |           |           |
|-------|----------|----------|----------|-----------|-----------|-----------|
| C(34) | 0.023(3) | 0.036(4) | 0.026(4) | -0.001(3) | -0.002(3) | 0.000(3)  |
| C(35) | 0.023(3) | 0.039(4) | 0.027(4) | -0.001(3) | 0.003(3)  | -0.009(3) |
| C(36) | 0.026(4) | 0.034(4) | 0.030(4) | 0.001(3)  | 0.000(3)  | -0.009(3) |
| C(37) | 0.028(4) | 0.046(5) | 0.035(4) | -0.001(3) | 0.000(3)  | -0.002(3) |
| C(38) | 0.034(4) | 0.039(4) | 0.035(4) | -0.002(3) | 0.008(3)  | -0.005(3) |
| C(39) | 0.026(4) | 0.059(5) | 0.045(5) | 0.005(4)  | 0.008(3)  | 0.000(4)  |
| C(40) | 0.037(4) | 0.053(5) | 0.060(6) | -0.001(4) | 0.000(4)  | -0.007(4) |
| C(41) | 0.033(4) | 0.053(5) | 0.042(5) | -0.004(4) | -0.002(4) | -0.008(4) |
| C(42) | 0.028(4) | 0.044(5) | 0.036(5) | 0.000(3)  | -0.001(3) | -0.009(3) |
| C(43) | 0.036(4) | 0.043(4) | 0.038(5) | -0.002(3) | -0.007(3) | -0.008(4) |
| C(44) | 0.035(4) | 0.043(4) | 0.026(4) | 0.002(3)  | -0.004(3) | -0.004(3) |
| C(45) | 0.043(4) | 0.041(4) | 0.025(4) | -0.008(3) | 0.001(3)  | -0.011(4) |
| C(46) | 0.082(7) | 0.065(6) | 0.042(6) | -0.015(5) | 0.017(5)  | -0.025(6) |
| C(47) | 0.095(8) | 0.060(6) | 0.049(6) | -0.028(5) | 0.037(6)  | -0.027(6) |
| C(48) | 0.078(7) | 0.059(6) | 0.046(6) | -0.022(5) | 0.020(5)  | -0.019(5) |
| C(49) | 0.042(4) | 0.041(5) | 0.030(4) | -0.001(3) | 0.004(3)  | -0.003(4) |
| C(50) | 0.031(4) | 0.045(4) | 0.024(4) | -0.002(3) | 0.001(3)  | -0.003(3) |
| C(51) | 0.032(4) | 0.031(4) | 0.023(4) | 0.000(3)  | 0.003(3)  | 0.000(3)  |
| C(52) | 0.030(4) | 0.039(4) | 0.019(4) | 0.002(3)  | 0.000(3)  | -0.003(3) |
| C(53) | 0.023(3) | 0.046(4) | 0.017(4) | 0.002(3)  | 0.001(3)  | -0.004(3) |
| C(54) | 0.027(4) | 0.044(4) | 0.027(4) | 0.003(3)  | 0.000(3)  | 0.000(3)  |
| C(55) | 0.030(4) | 0.056(5) | 0.031(4) | 0.005(4)  | -0.001(3) | 0.004(4)  |
| C(56) | 0.037(4) | 0.039(4) | 0.032(4) | -0.001(3) | 0.009(3)  | 0.004(3)  |
| C(57) | 0.034(4) | 0.035(4) | 0.024(4) | 0.000(3)  | -0.005(3) | 0.000(3)  |
| C(58) | 0.027(3) | 0.035(4) | 0.024(4) | -0.002(3) | 0.007(3)  | -0.004(3) |
| C(59) | 0.031(4) | 0.039(4) | 0.025(4) | -0.006(3) | -0.004(3) | -0.005(3) |
| C(60) | 0.031(4) | 0.028(4) | 0.021(4) | 0.001(3)  | -0.003(3) | 0.000(3)  |
| C(61) | 0.035(4) | 0.026(4) | 0.022(4) | -0.002(3) | -0.001(3) | 0.002(3)  |
| C(62) | 0.032(4) | 0.035(4) | 0.026(4) | -0.007(3) | -0.003(3) | -0.008(3) |
| C(63) | 0.034(4) | 0.024(4) | 0.024(4) | -0.004(3) | 0.000(3)  | -0.001(3) |
| C(64) | 0.045(4) | 0.034(4) | 0.025(4) | 0.000(3)  | 0.000(3)  | 0.005(3)  |
| C(65) | 0.042(4) | 0.024(4) | 0.026(4) | 0.003(3)  | -0.005(3) | -0.004(3) |
| C(66) | 0.034(4) | 0.036(4) | 0.026(4) | 0.002(3)  | -0.004(3) | -0.001(3) |
| N(1)  | 0.019(3) | 0.050(4) | 0.040(4) | -0.010(3) | -0.005(3) | -0.007(3) |
| N(2A) | 0.058(4) | 0.039(4) | 0.047(5) | -0.016(3) | 0.018(3)  | 0.008(3)  |
| N(2B) | 0.058(4) | 0.039(4) | 0.047(5) | -0.016(3) | 0.018(3)  | 0.008(3)  |
| N(3A) | 0.083(6) | 0.054(5) | 0.062(6) | -0.033(4) | 0.011(5)  | -0.010(4) |
| N(3B) | 0.083(6) | 0.054(5) | 0.062(6) | -0.033(4) | 0.011(5)  | -0.010(4) |
| O(1)  | 0.026(2) | 0.030(3) | 0.041(3) | 0.007(2)  | -0.007(2) | -0.005(2) |

|       |           |           |           |            |            |            |
|-------|-----------|-----------|-----------|------------|------------|------------|
| O(2)  | 0.031(3)  | 0.028(3)  | 0.025(3)  | -0.001(2)  | -0.002(2)  | 0.006(2)   |
| O(3)  | 0.023(2)  | 0.056(3)  | 0.025(3)  | 0.005(2)   | 0.000(2)   | -0.005(2)  |
| O(4)  | 0.031(3)  | 0.035(3)  | 0.027(3)  | -0.003(2)  | -0.002(2)  | -0.002(2)  |
| O(5)  | 0.073(5)  | 0.062(5)  | 0.054(5)  | -0.023(4)  | -0.010(4)  | 0.044(4)   |
| O(6)  | 0.031(4)  | 0.069(5)  | 0.045(4)  | -0.012(4)  | 0.004(3)   | -0.008(3)  |
| O(7)  | 0.138(9)  | 0.119(8)  | 0.100(8)  | 0.020(7)   | 0.035(7)   | 0.046(8)   |
| O(8)  | 0.197(12) | 0.218(13) | 0.143(11) | -0.064(10) | -0.025(10) | 0.089(10)  |
| F(1)  | 0.095(6)  | 0.198(11) | 0.028(4)  | 0.025(5)   | 0.008(4)   | -0.002(7)  |
| F(2)  | 0.126(7)  | 0.077(5)  | 0.065(5)  | 0.025(4)   | -0.020(5)  | 0.036(5)   |
| F(3)  | 0.068(5)  | 0.139(8)  | 0.040(4)  | -0.031(4)  | -0.017(3)  | 0.024(5)   |
| F(4)  | 0.371(13) | 0.350(13) | 0.372(13) | -0.008(8)  | 0.023(8)   | 0.006(8)   |
| F(5)  | 0.371(13) | 0.350(13) | 0.372(13) | -0.008(8)  | 0.023(8)   | 0.006(8)   |
| F(6)  | 0.371(13) | 0.350(13) | 0.372(13) | -0.008(8)  | 0.023(8)   | 0.006(8)   |
| F(7)  | 0.082(4)  | 0.070(4)  | 0.099(5)  | -0.030(4)  | 0.041(4)   | 0.009(3)   |
| F(8)  | 0.063(3)  | 0.058(4)  | 0.103(5)  | 0.001(3)   | 0.024(3)   | 0.027(3)   |
| F(9)  | 0.086(4)  | 0.059(4)  | 0.095(5)  | -0.038(3)  | 0.029(4)   | -0.011(3)  |
| F(10) | 0.101(5)  | 0.080(4)  | 0.055(4)  | -0.012(3)  | 0.036(3)   | 0.014(4)   |
| F(11) | 0.043(3)  | 0.062(3)  | 0.101(5)  | -0.021(3)  | 0.019(3)   | -0.002(3)  |
| F(12) | 0.172(8)  | 0.047(4)  | 0.203(9)  | 0.051(5)   | 0.139(8)   | 0.040(4)   |
| F(13) | 0.090(5)  | 0.053(4)  | 0.193(9)  | 0.040(5)   | 0.083(5)   | 0.018(3)   |
| F(14) | 0.231(10) | 0.051(4)  | 0.085(5)  | 0.031(4)   | 0.079(6)   | 0.031(5)   |
| F(15) | 0.128(6)  | 0.043(3)  | 0.107(5)  | 0.024(3)   | 0.054(5)   | 0.031(4)   |
| F(16) | 0.106(5)  | 0.048(4)  | 0.158(7)  | -0.015(4)  | 0.062(5)   | -0.020(4)  |
| F(17) | 0.015(2)  | 0.084(3)  | 0.034(3)  | 0.000(2)   | -0.001(2)  | 0.001(2)   |
| F(18) | 0.027(2)  | 0.070(3)  | 0.036(3)  | -0.011(2)  | 0.002(2)   | 0.009(2)   |
| F(19) | 0.029(2)  | 0.055(3)  | 0.037(3)  | 0.013(2)   | 0.000(2)   | -0.007(2)  |
| F(20) | 0.029(2)  | 0.072(3)  | 0.028(2)  | -0.013(2)  | 0.000(2)   | -0.002(2)  |
| F(21) | 0.030(2)  | 0.069(3)  | 0.040(3)  | 0.020(2)   | -0.002(2)  | 0.008(2)   |
| F(22) | 0.030(2)  | 0.111(5)  | 0.032(3)  | 0.022(3)   | 0.000(2)   | -0.015(3)  |
| F(23) | 0.023(2)  | 0.082(3)  | 0.034(3)  | 0.005(2)   | 0.003(2)   | 0.006(2)   |
| F(24) | 0.036(2)  | 0.070(3)  | 0.035(3)  | 0.010(2)   | -0.007(2)  | -0.018(2)  |
| F(25) | 0.030(2)  | 0.061(3)  | 0.034(2)  | 0.020(2)   | -0.007(2)  | -0.004(2)  |
| F(26) | 0.032(2)  | 0.080(3)  | 0.024(2)  | -0.004(2)  | 0.004(2)   | -0.006(2)  |
| F(27) | 0.372(19) | 0.140(8)  | 0.192(10) | -0.132(8)  | 0.193(12)  | -0.181(11) |
| F(28) | 0.205(10) | 0.064(4)  | 0.130(7)  | -0.041(5)  | 0.103(8)   | -0.043(5)  |
| F(29) | 0.244(12) | 0.059(4)  | 0.130(7)  | -0.031(4)  | 0.117(8)   | -0.058(6)  |
| F(30) | 0.208(11) | 0.188(10) | 0.113(7)  | -0.096(7)  | 0.084(7)   | -0.162(9)  |
| F(31) | 0.295(15) | 0.192(10) | 0.093(7)  | -0.100(7)  | 0.092(8)   | -0.179(11) |
| F(32) | 0.068(3)  | 0.047(3)  | 0.061(3)  | -0.002(2)  | 0.029(3)   | -0.005(3)  |

|       |           |           |           |           |           |           |
|-------|-----------|-----------|-----------|-----------|-----------|-----------|
| F(33) | 0.053(3)  | 0.041(3)  | 0.057(3)  | -0.011(2) | 0.018(2)  | 0.005(2)  |
| F(34) | 0.072(4)  | 0.094(4)  | 0.026(3)  | -0.004(3) | 0.002(2)  | -0.005(3) |
| F(35) | 0.067(3)  | 0.058(3)  | 0.050(3)  | 0.017(2)  | 0.018(3)  | 0.024(3)  |
| F(36) | 0.047(3)  | 0.048(3)  | 0.047(3)  | -0.014(2) | 0.007(2)  | -0.009(2) |
| F(37) | 0.069(3)  | 0.038(3)  | 0.061(3)  | 0.005(2)  | 0.005(3)  | -0.014(2) |
| F(38) | 0.066(3)  | 0.043(3)  | 0.032(3)  | 0.006(2)  | 0.002(2)  | -0.008(2) |
| F(39) | 0.044(3)  | 0.042(3)  | 0.059(3)  | 0.005(2)  | 0.010(2)  | -0.005(2) |
| F(40) | 0.068(3)  | 0.031(2)  | 0.043(3)  | -0.010(2) | -0.003(2) | -0.012(2) |
| F(41) | 0.061(3)  | 0.026(2)  | 0.055(3)  | 0.000(2)  | 0.007(2)  | 0.005(2)  |
| F(42) | 0.046(3)  | 0.050(3)  | 0.051(3)  | 0.012(2)  | -0.018(2) | -0.016(2) |
| F(43) | 0.050(3)  | 0.034(2)  | 0.045(3)  | -0.001(2) | -0.011(2) | -0.008(2) |
| F(44) | 0.063(3)  | 0.056(3)  | 0.029(3)  | 0.017(2)  | -0.015(2) | -0.019(2) |
| F(45) | 0.042(3)  | 0.040(3)  | 0.059(3)  | 0.006(2)  | -0.011(2) | 0.003(2)  |
| F(46) | 0.038(2)  | 0.049(3)  | 0.038(3)  | 0.013(2)  | -0.004(2) | -0.006(2) |
| P(1)  | 0.026(1)  | 0.033(1)  | 0.029(1)  | -0.005(1) | 0.002(1)  | 0.001(1)  |
| P(2)  | 0.031(1)  | 0.037(1)  | 0.029(1)  | -0.008(1) | 0.000(1)  | -0.003(1) |
| S(1A) | 0.034(1)  | 0.050(1)  | 0.025(1)  | -0.005(1) | -0.002(1) | 0.008(1)  |
| S(1B) | 0.056(8)  | 0.088(10) | 0.063(9)  | -0.022(7) | -0.019(6) | 0.020(7)  |
| S(3)  | 0.057(1)  | 0.048(1)  | 0.069(2)  | -0.012(1) | 0.021(1)  | 0.004(1)  |
| S(2A) | 0.054(2)  | 0.055(2)  | 0.093(3)  | -0.038(2) | 0.008(2)  | -0.003(2) |
| S(2B) | 0.114(14) | 0.055(8)  | 0.077(10) | -0.010(7) | 0.023(9)  | -0.014(8) |
| S(4)  | 0.109(2)  | 0.034(1)  | 0.117(3)  | 0.021(2)  | 0.068(2)  | 0.016(1)  |
| S(5)  | 0.022(1)  | 0.051(1)  | 0.025(1)  | 0.001(1)  | -0.001(1) | 0.002(1)  |
| S(6)  | 0.023(1)  | 0.069(1)  | 0.025(1)  | 0.007(1)  | -0.002(1) | -0.006(1) |
| S(7)  | 0.228(5)  | 0.097(3)  | 0.110(3)  | -0.071(2) | 0.107(3)  | -0.104(3) |
| S(8)  | 0.046(1)  | 0.038(1)  | 0.035(1)  | 0.000(1)  | 0.007(1)  | 0.002(1)  |
| S(9)  | 0.052(1)  | 0.028(1)  | 0.039(1)  | -0.002(1) | 0.003(1)  | -0.005(1) |
| S(10) | 0.042(1)  | 0.036(1)  | 0.034(1)  | 0.009(1)  | -0.010(1) | -0.005(1) |

---

**Hydrogen coordinates and isotropic displacement parameters ( $\text{\AA}^2$ ).**

|      | x       | y      | z      | $U_{\text{eq}}$ |
|------|---------|--------|--------|-----------------|
| H(6) | -0.1313 | 0.2314 | 0.1820 | 0.037           |
| H(7) | -0.2371 | 0.2028 | 0.1630 | 0.040           |
| H(8) | -0.3483 | 0.2297 | 0.1631 | 0.044           |

|       |         |        |         |       |
|-------|---------|--------|---------|-------|
| H(9)  | -0.3523 | 0.2848 | 0.1762  | 0.036 |
| H(11) | -0.2908 | 0.3361 | 0.1986  | 0.033 |
| H(14) | -0.2707 | 0.3777 | 0.3261  | 0.047 |
| H(16) | -0.2173 | 0.4680 | 0.2504  | 0.062 |
| H(18) | -0.1140 | 0.3921 | 0.1363  | 0.049 |
| H(22) | -0.0905 | 0.2697 | 0.0329  | 0.036 |
| H(23) | -0.0460 | 0.2369 | -0.0826 | 0.044 |
| H(24) | 0.0552  | 0.2051 | -0.0534 | 0.044 |
| H(25) | 0.1126  | 0.2072 | 0.0860  | 0.039 |
| H(27) | 0.1246  | 0.2306 | 0.2435  | 0.034 |
| H(30) | 0.1950  | 0.2676 | 0.3595  | 0.035 |
| H(32) | 0.1667  | 0.2474 | 0.6322  | 0.039 |
| H(34) | -0.0026 | 0.2526 | 0.4609  | 0.034 |
| H(38) | 0.3730  | 0.3305 | 0.1275  | 0.043 |
| H(39) | 0.4907  | 0.3456 | 0.1043  | 0.052 |
| H(40) | 0.5588  | 0.3658 | 0.2254  | 0.060 |
| H(41) | 0.5075  | 0.3778 | 0.3643  | 0.051 |
| H(43) | 0.4005  | 0.3805 | 0.4642  | 0.047 |
| H(46) | 0.3164  | 0.4236 | 0.5097  | 0.076 |
| H(48) | 0.1865  | 0.4123 | 0.7343  | 0.073 |
| H(50) | 0.2059  | 0.3405 | 0.5463  | 0.040 |
| H(54) | 0.3372  | 0.2820 | 0.2662  | 0.039 |
| H(55) | 0.3520  | 0.2290 | 0.2129  | 0.047 |
| H(56) | 0.2904  | 0.2116 | 0.0811  | 0.043 |
| H(57) | 0.2073  | 0.2437 | 0.0099  | 0.038 |
| H(59) | 0.1393  | 0.2958 | 0.0050  | 0.038 |
| H(62) | 0.1665  | 0.3935 | 0.0465  | 0.037 |
| H(64) | -0.0115 | 0.4094 | -0.1069 | 0.042 |
| H(66) | 0.0184  | 0.3229 | 0.0233  | 0.038 |
| H(2A) | -0.0204 | 0.3771 | 0.4271  | 0.057 |
| H(2B) | -0.0865 | 0.3665 | 0.3770  | 0.057 |
| H(3A) | 0.1802  | 0.4111 | 0.3476  | 0.080 |
| H(3B) | 0.0897  | 0.4079 | 0.3521  | 0.080 |

---

The structure of **4c** was solved by direct methods and refined by full-matrix least-squares against  $F^2$  to  $R_I = 0.0674$  [ $I > 2\sigma(I)$ ],  $wR_2 = 0.1920$ , 1405 parameters. The trifluoromethylsulfonyl-amino group is disordered over the two positions. In addition, the trifluoromethylsulfonyl-amino and trifluoromethylsulfonyl-phosphazene groups are slightly disordered. The major components (80% occupation) could be located and refined. Only the S atoms of the minor triflate components could be located and refined. All non-H atoms of one of the two trifluoromethylsulfonyl-amino/phosphazene groups were refined with anisotropic atomic displacement parameters. The atomic displacement parameters of the F, C and O atoms of the second trifluoromethylsulfonyl-amino/phosphazene group were restrained to be isotropic with an effective standard deviation of 0.005, whereby the atomic displacement parameters of the three F atoms were constrained to be equal. For this tri-fluoromethylsulfonyl-amino/phosphazene group the respective S...F, C–F and F...F distances were restrained to be equal with an effective standard deviation of 0.02, as were the S–C distances of both trifluoromethylsulfonyl-amino/phosphazene groups (total 46 restraints). The solvate (dichloromethane/hexane) region of the crystal was modeled by C and Cl atoms of various occupancies and refined isotropic atomic displacement parameters. A void of 43.95 Å<sup>3</sup>, close to symmetry elements, remained (0.4 % of the unit cell volume, probe radius 1.2 Å, grid spacing 0.7 Å). The H atom attached to the trifluoromethylsulfonyl-amino group could not be located and was refined using a riding model, as were the other H atoms in the imidodiphosphorimidate (IDPI). The riding model used C–H distances of 0.95 Å and  $U_H = 1.2 \times U_C(\text{CH}_{\text{aromatic}})$  and 0.88 Å and  $U_H = 1.5 \times U_N(\text{NH})$ .  $S = 1.522$ , residual electron density 0.90 (0.82 Å from F6)/ -0.80 (0.95 from F29) e Å<sup>-3</sup>. The Flack parameter (Parsons' method: Parsons, Flack and Wagner, *Acta Cryst.* B69 (2013) 249-259) is 0.031(4) [6454 quotients]. CCDC 1559571.

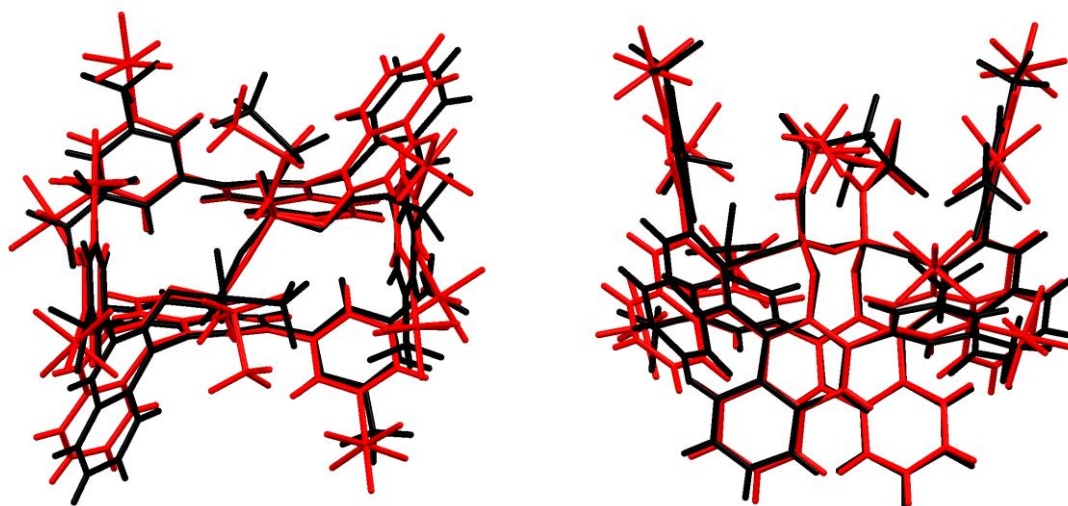

**Figure S9.** Superposition of the central O<sub>2</sub>P–N=PO<sub>2</sub> moieties of **4b** (black, CSD refcode: AWAHIR) and **4c** (red), comparing conformations of the two compounds (left: view from above; right: side view).

## Copies of NMR Spectra

### $^1\text{H}$ NMR (S3a)

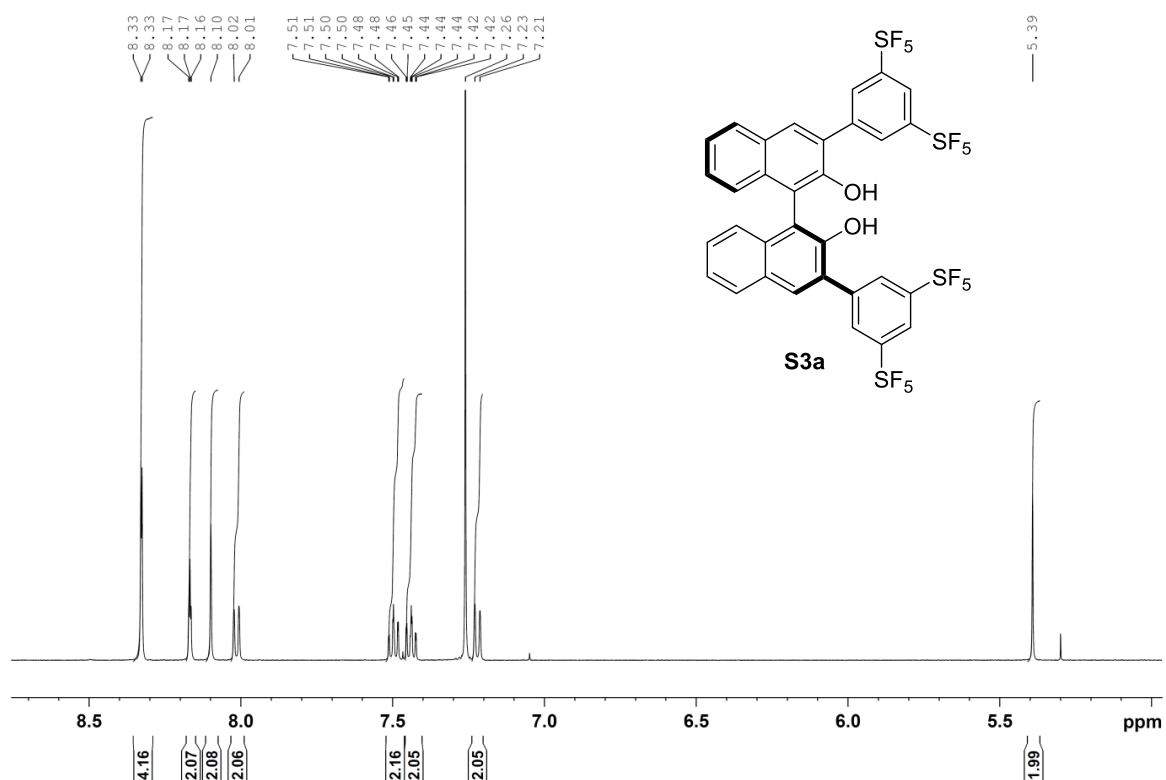

### $^{13}\text{C}$ NMR (S3a)

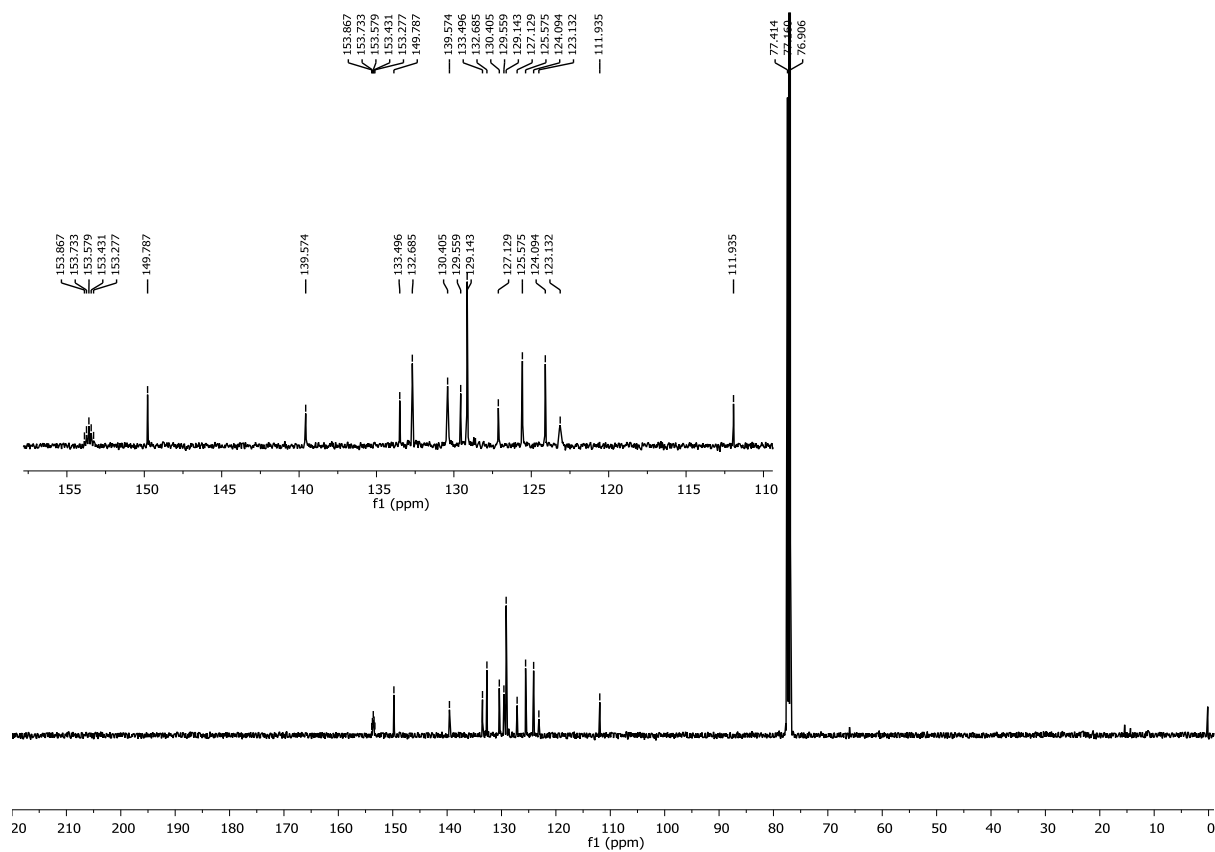



# <sup>19</sup>F NMR (S3a)

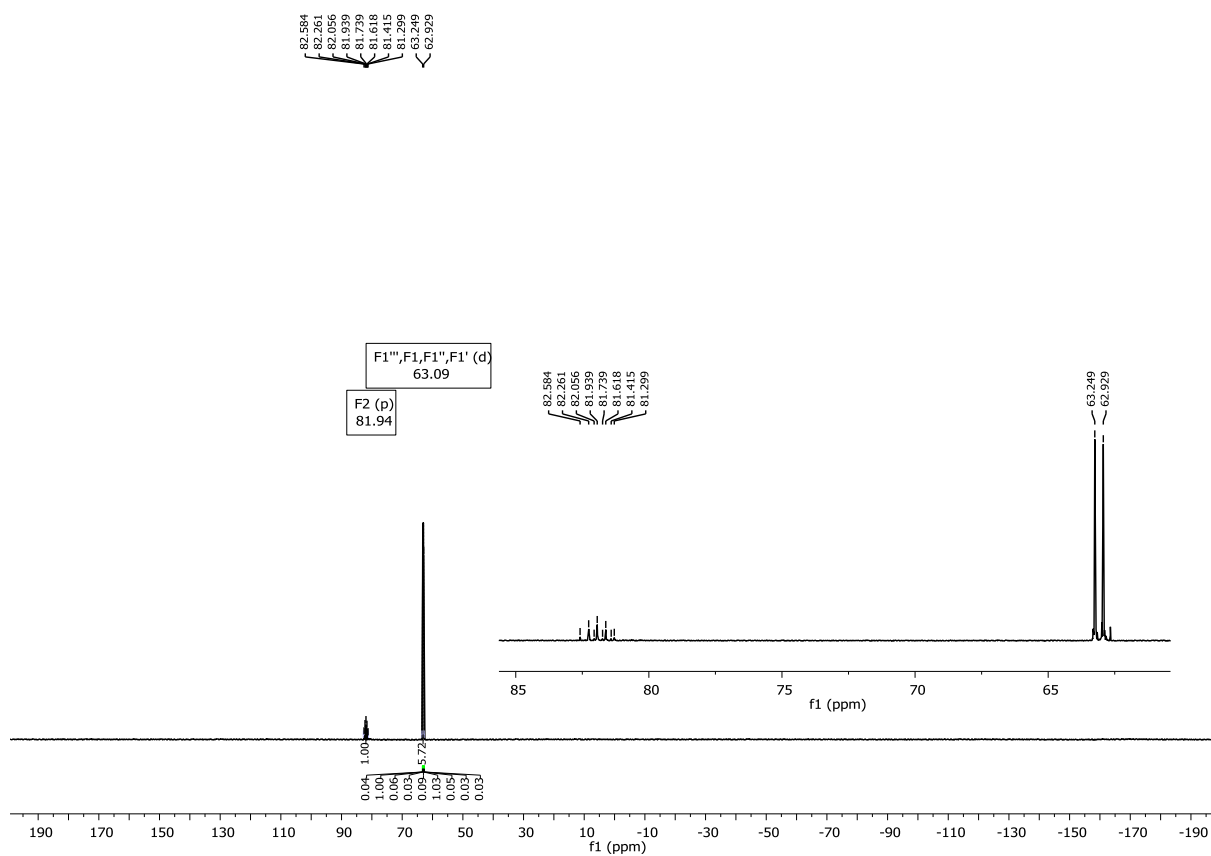

# <sup>1</sup>H NMR (S3b)

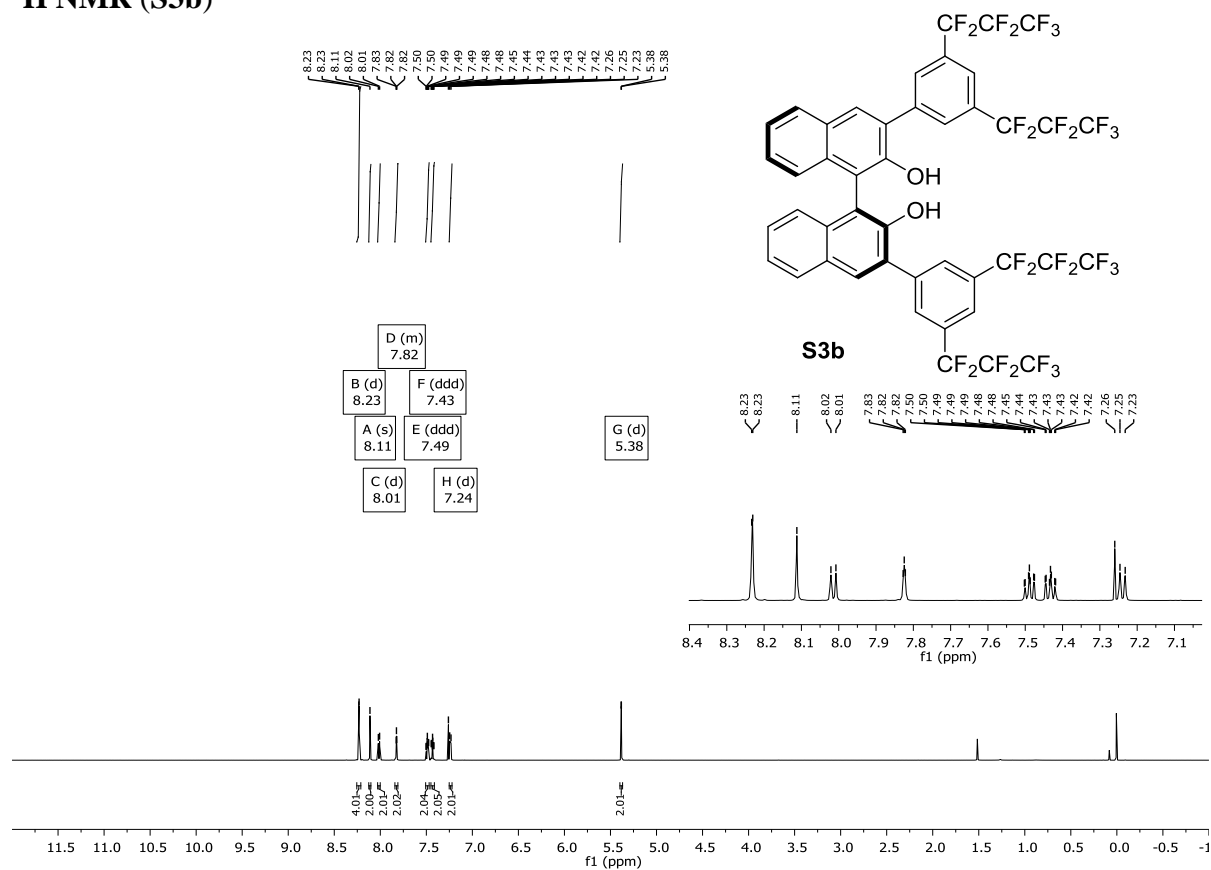

# <sup>13</sup>C NMR (S3b)

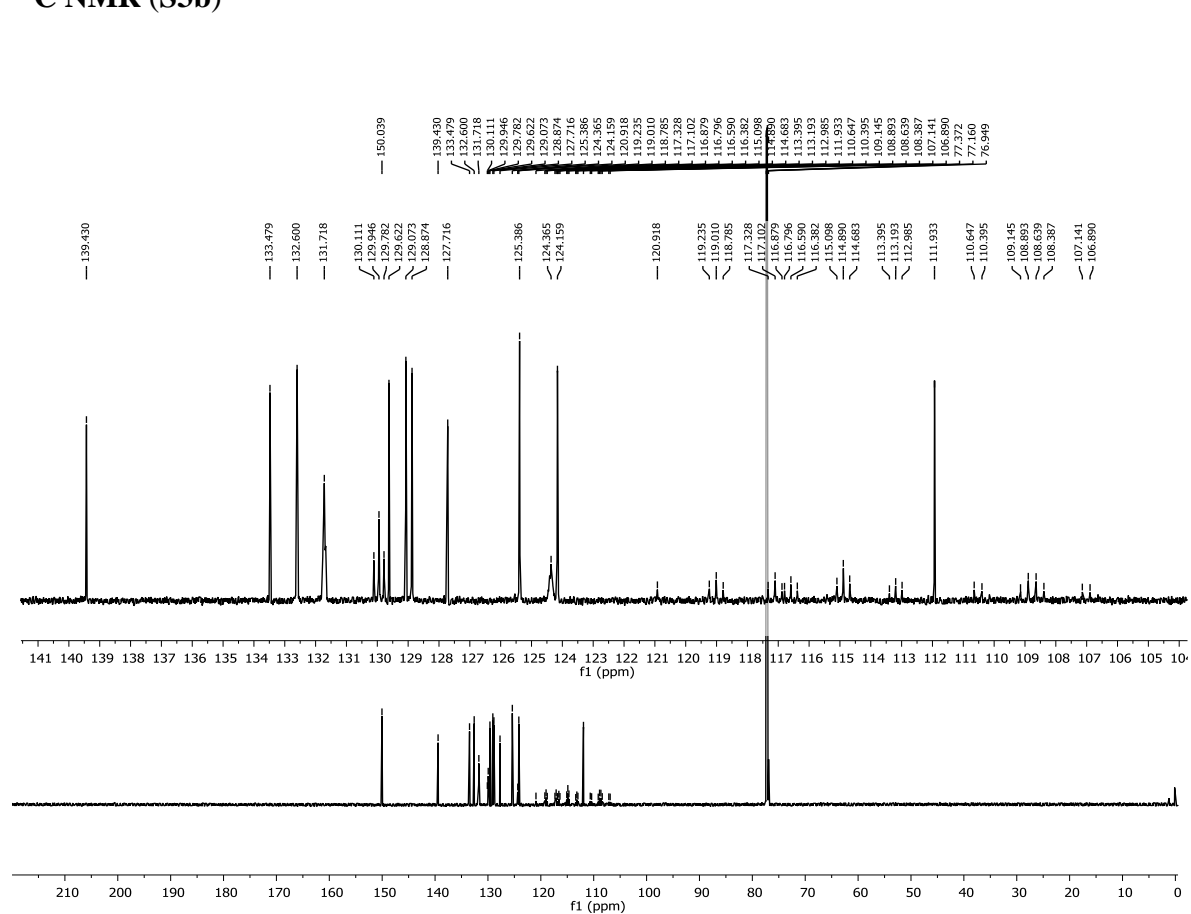

**$^{13}\text{C}$  NMR (S3b) ( $^1\text{H}$ ,  $^{19}\text{F}$  decoupled; broadband  $^{19}\text{F}$  decoupling)**

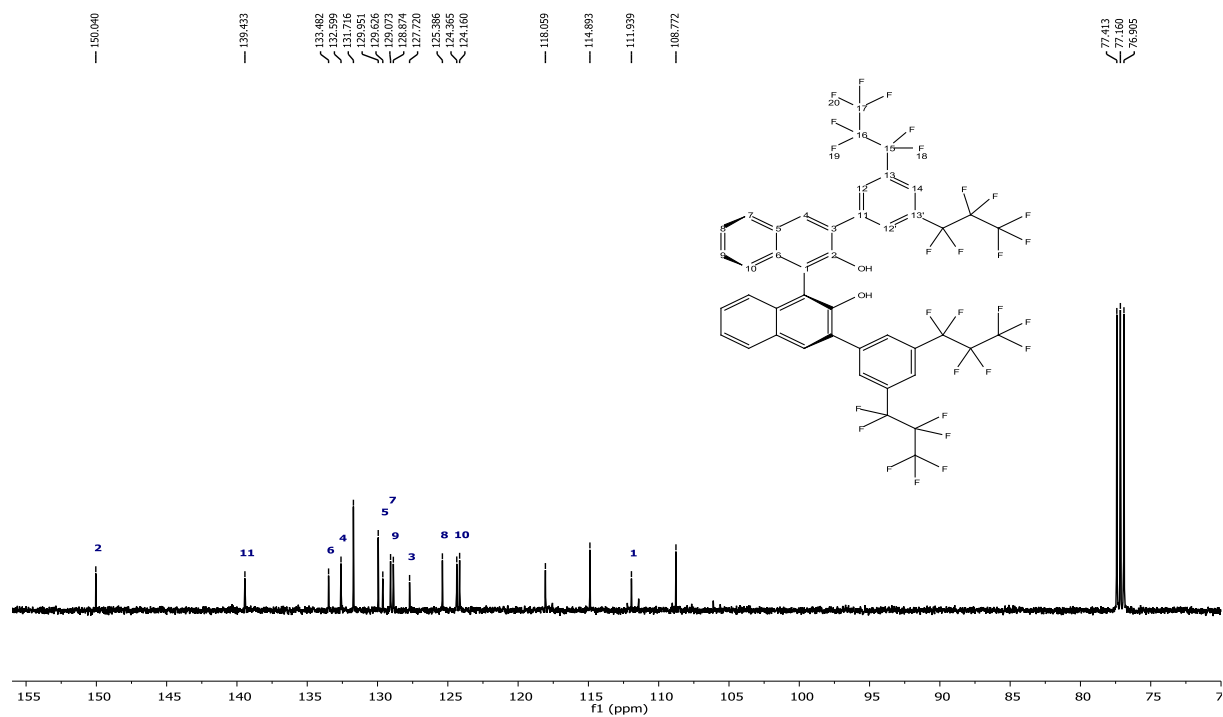

**$^{13}\text{C}$  NMR (S3b) ( $^1\text{H}$ ,  $^{19}\text{F}$  decoupled; selective  $^{19}\text{F}$  decoupling of F19, offset: -126.14)**

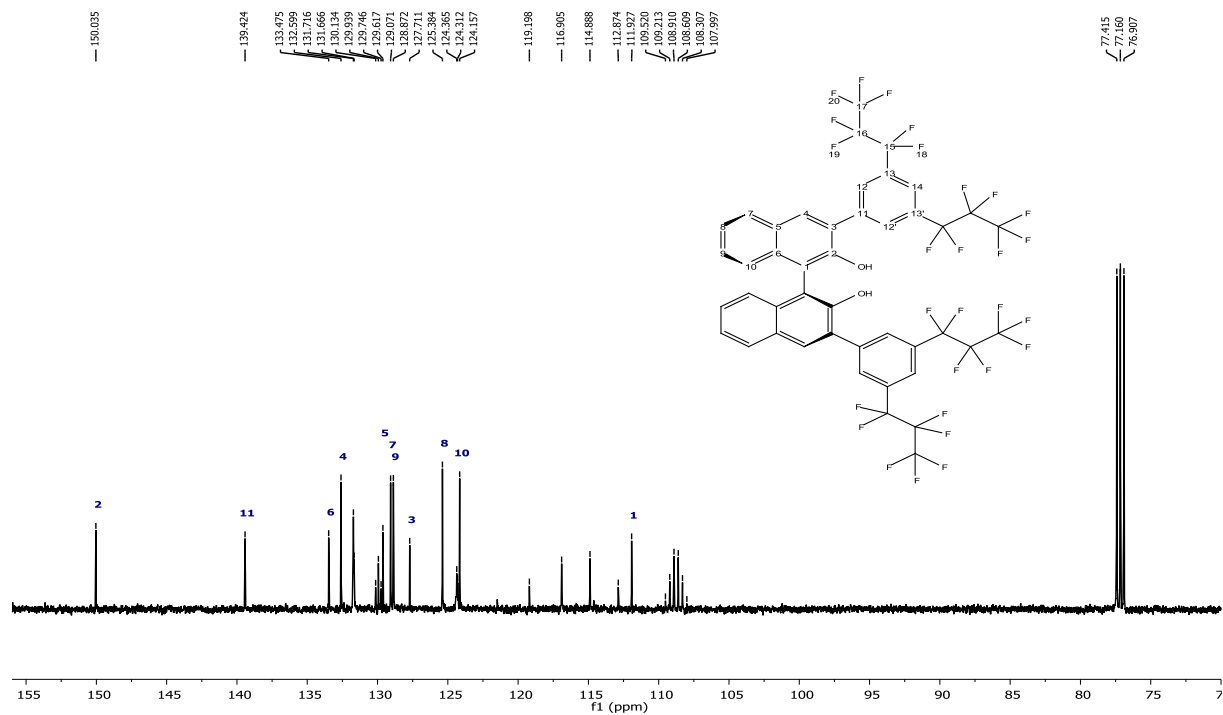

**$^{13}\text{C}$  NMR (S3b) ( $^1\text{H}$ ,  $^{19}\text{F}$  decoupled; selective  $^{19}\text{F}$  decoupling of F18, offset:  $-111.88$ )**

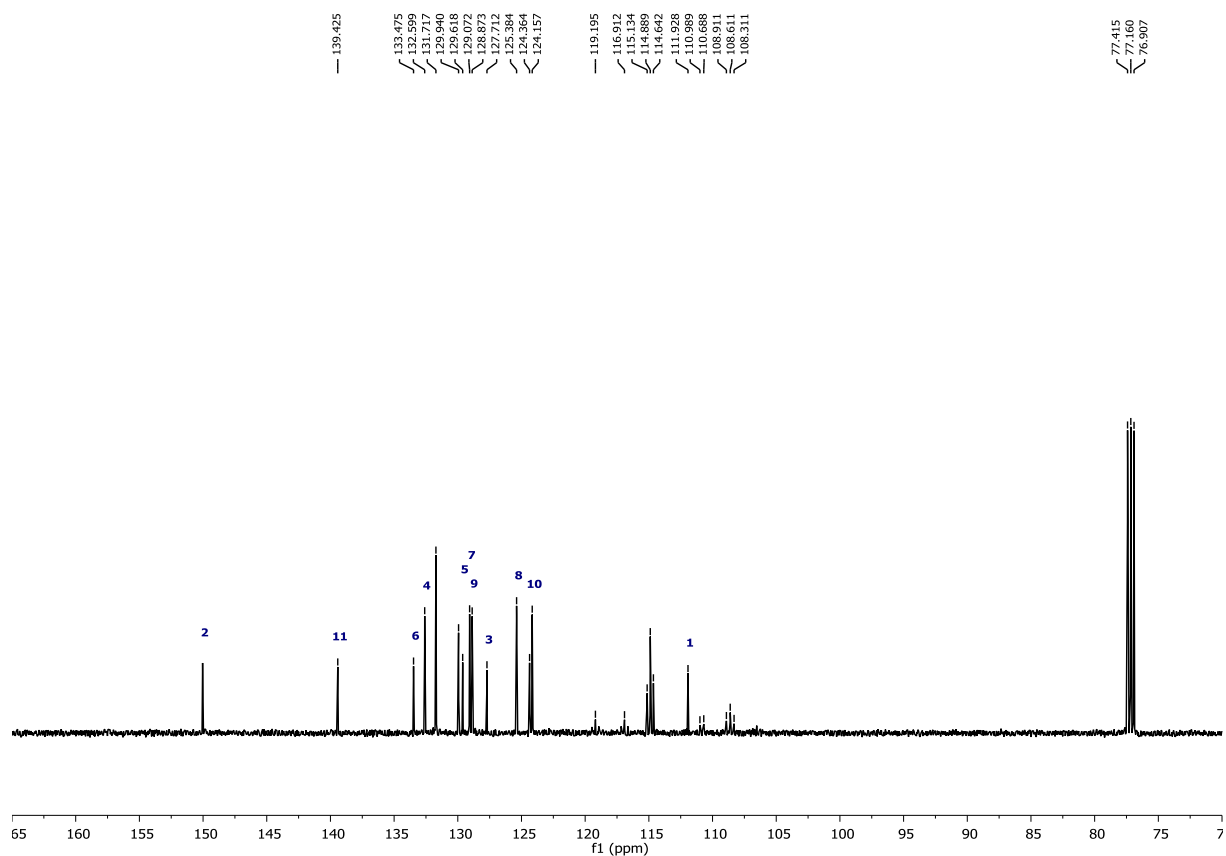

**$^{13}\text{C}$  NMR (S3b) ( $^1\text{H}$ ,  $^{19}\text{F}$  decoupled; selective  $^{19}\text{F}$  decoupling of F20, offset:  $-79.90$ )**

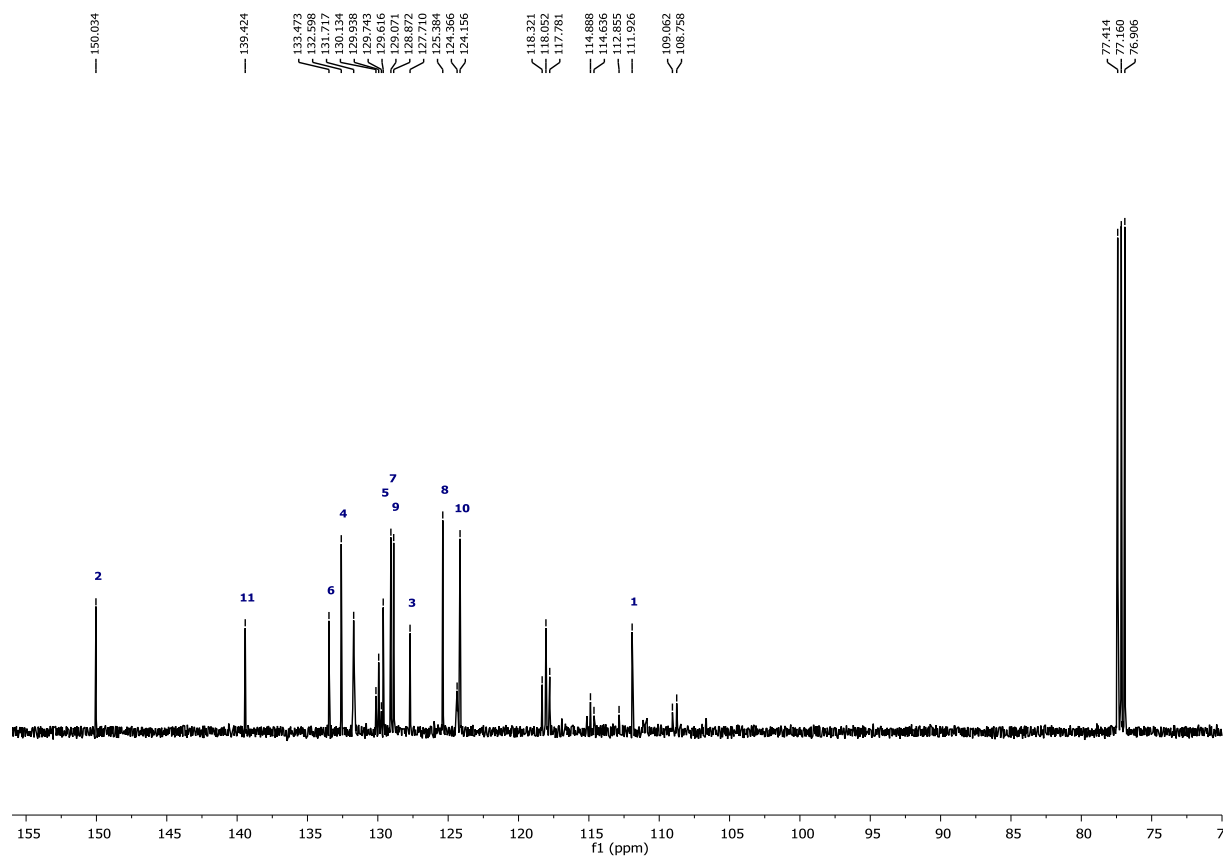

# <sup>19</sup>F NMR (S3b)

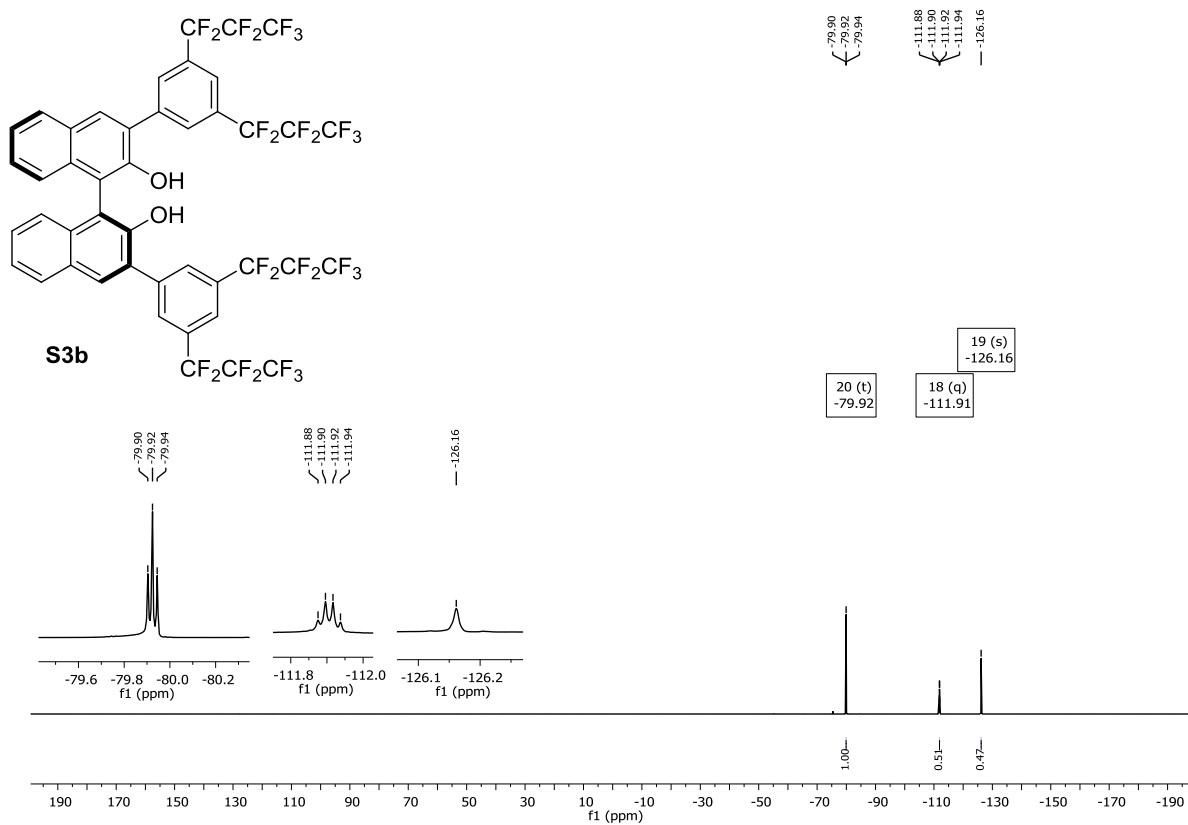

### <sup>1</sup>H NMR (S3c)

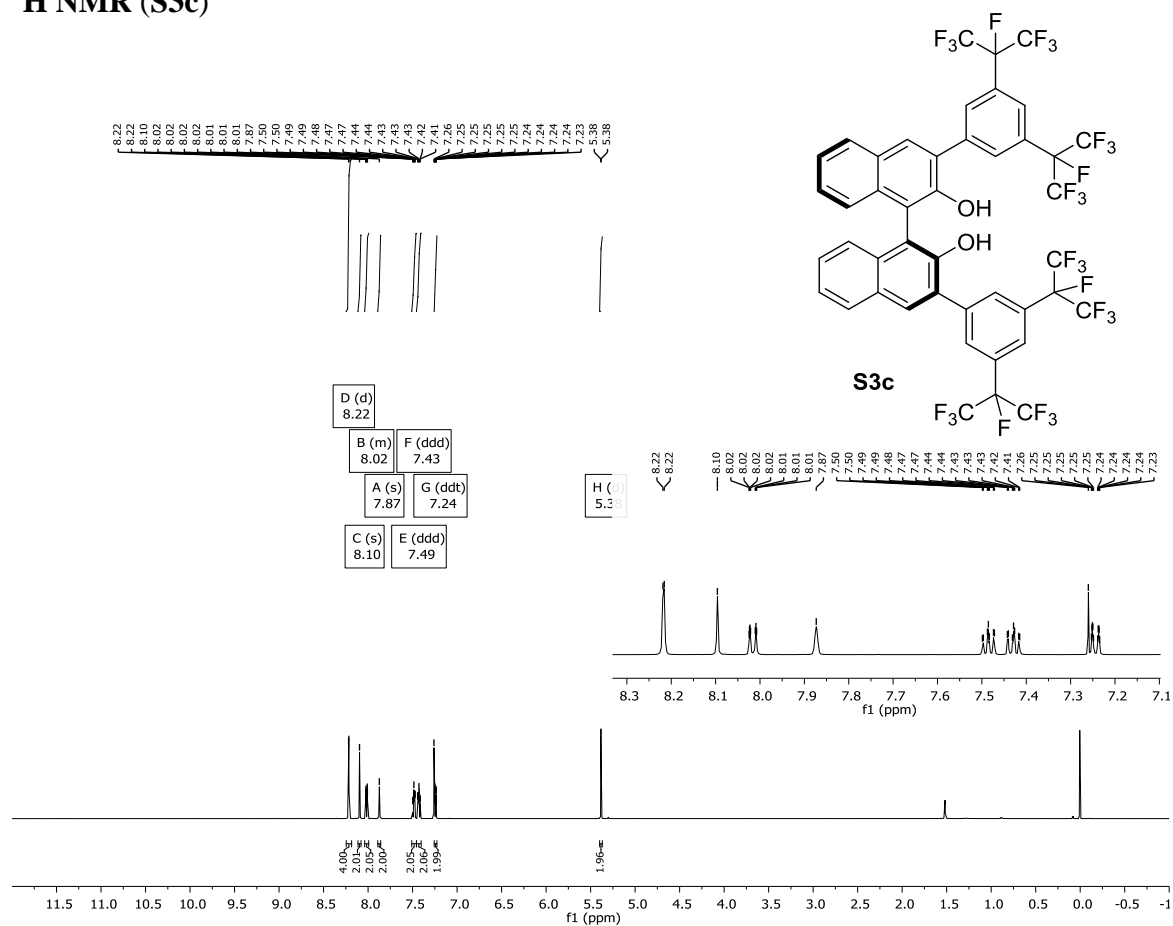

**<sup>13</sup>C NMR (S3c)**

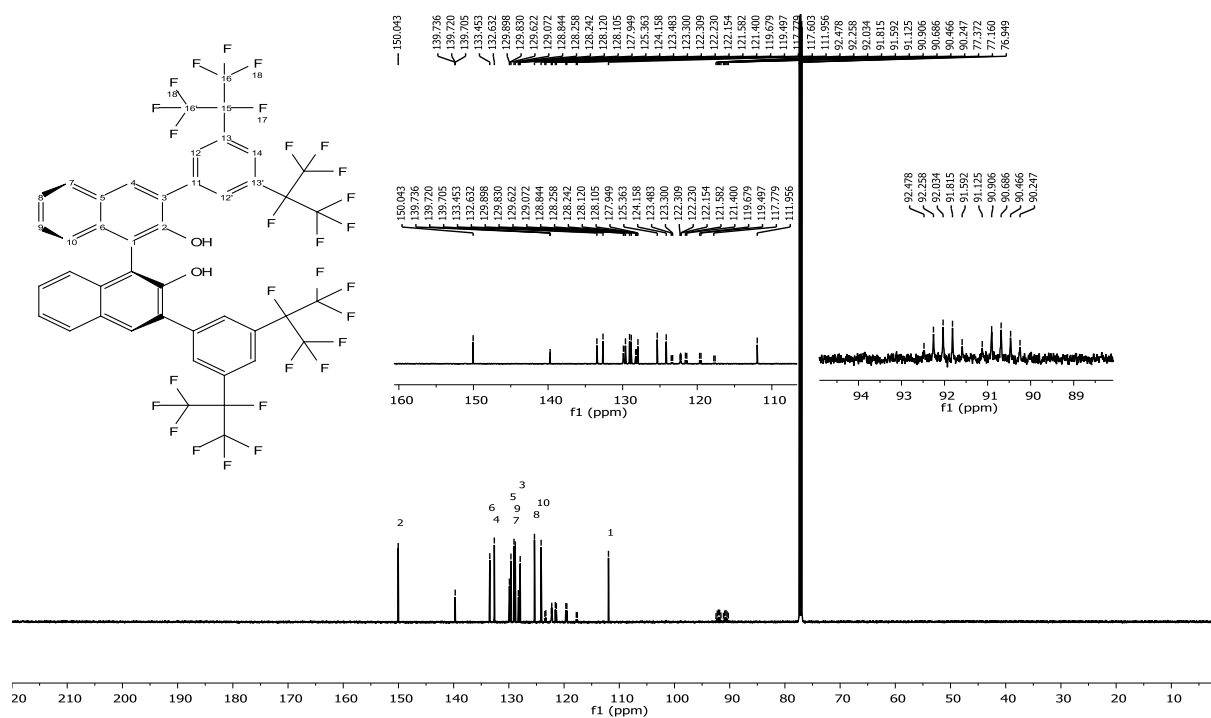

**$^{13}\text{C}$  NMR (S3c) ( $^1\text{H}$ ,  $^{19}\text{F}$  decoupled; broadband  $^{19}\text{F}$  decoupling)**

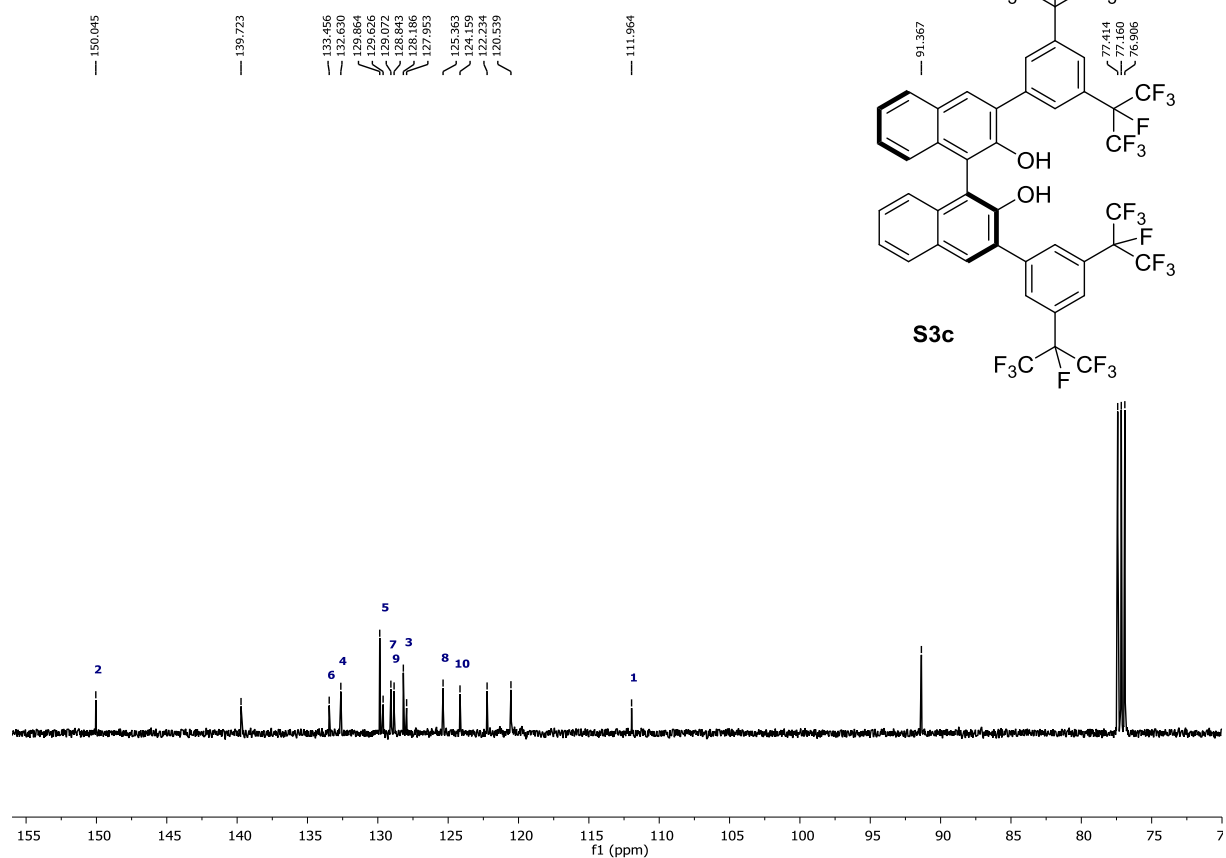

**$^{13}\text{C}$  NMR (S3c) ( $^1\text{H}$ ,  $^{19}\text{F}$  decoupled; selective  $^{19}\text{F}$  decoupling of F17, offset:  $-182.00$ )**

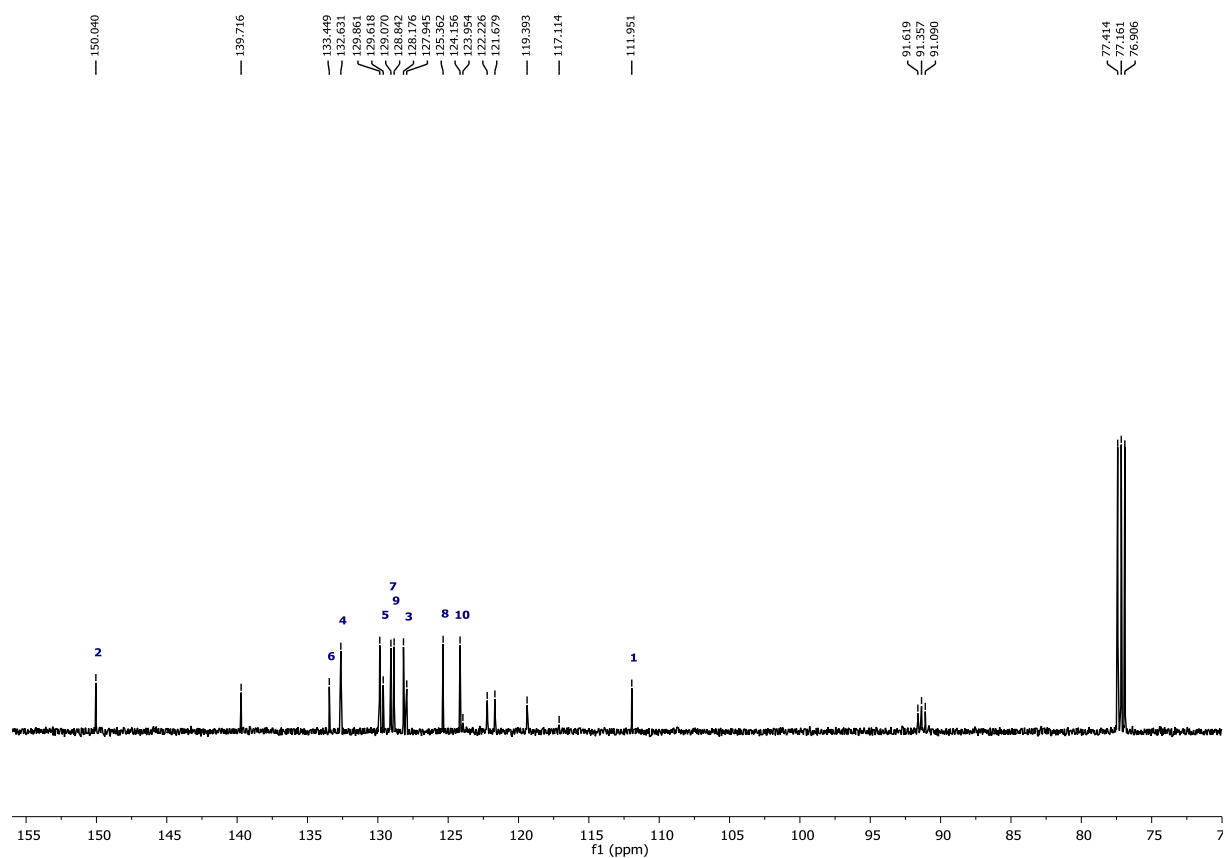

**<sup>1</sup>H NMR** (400 MHz, CDCl<sub>3</sub>)

7.54 (d, 6H), 7.54 (m, 1H)

**<sup>13</sup>C NMR** (100 MHz, CDCl<sub>3</sub>)

181.96, 181.97, 181.99, 182.00, 182.02, 182.04, 182.05

**S3c**

Oc1ccc2c(c1)c3ccccc3c2C(F)(F)F



<sup>13</sup>C NMR (S4)

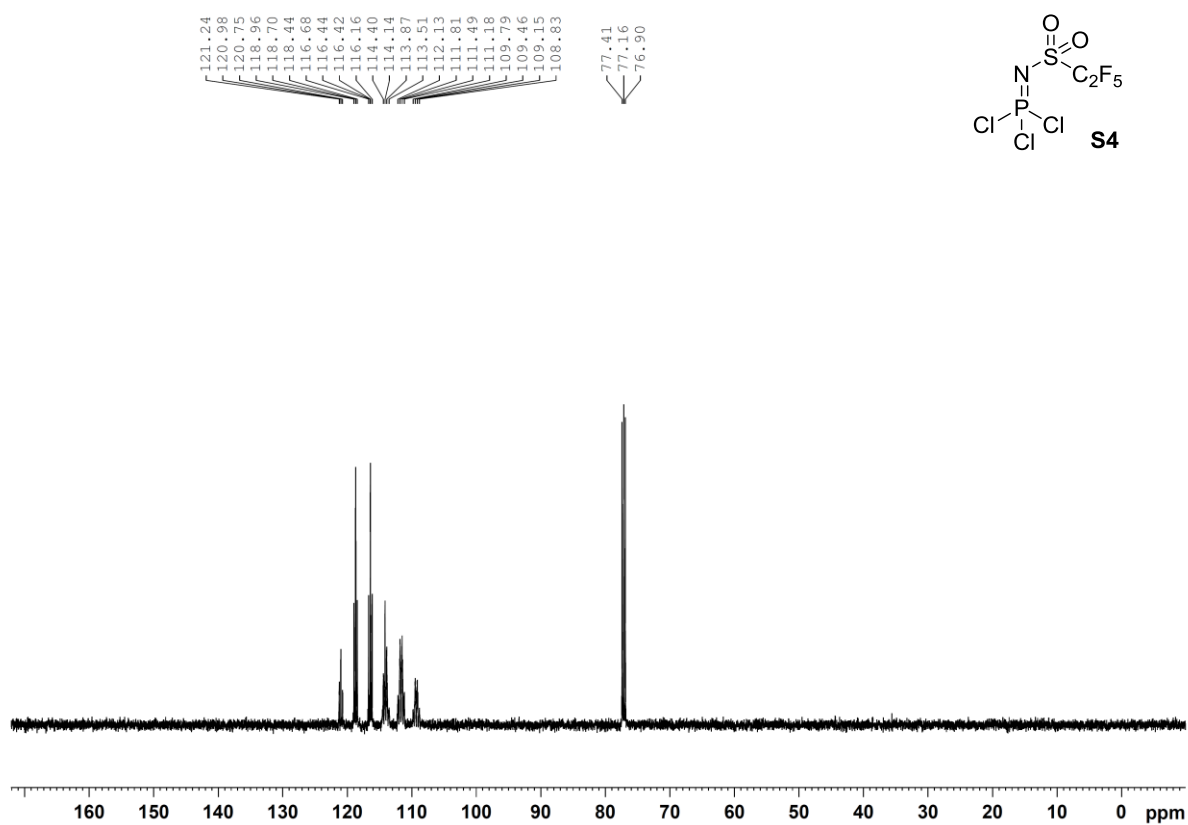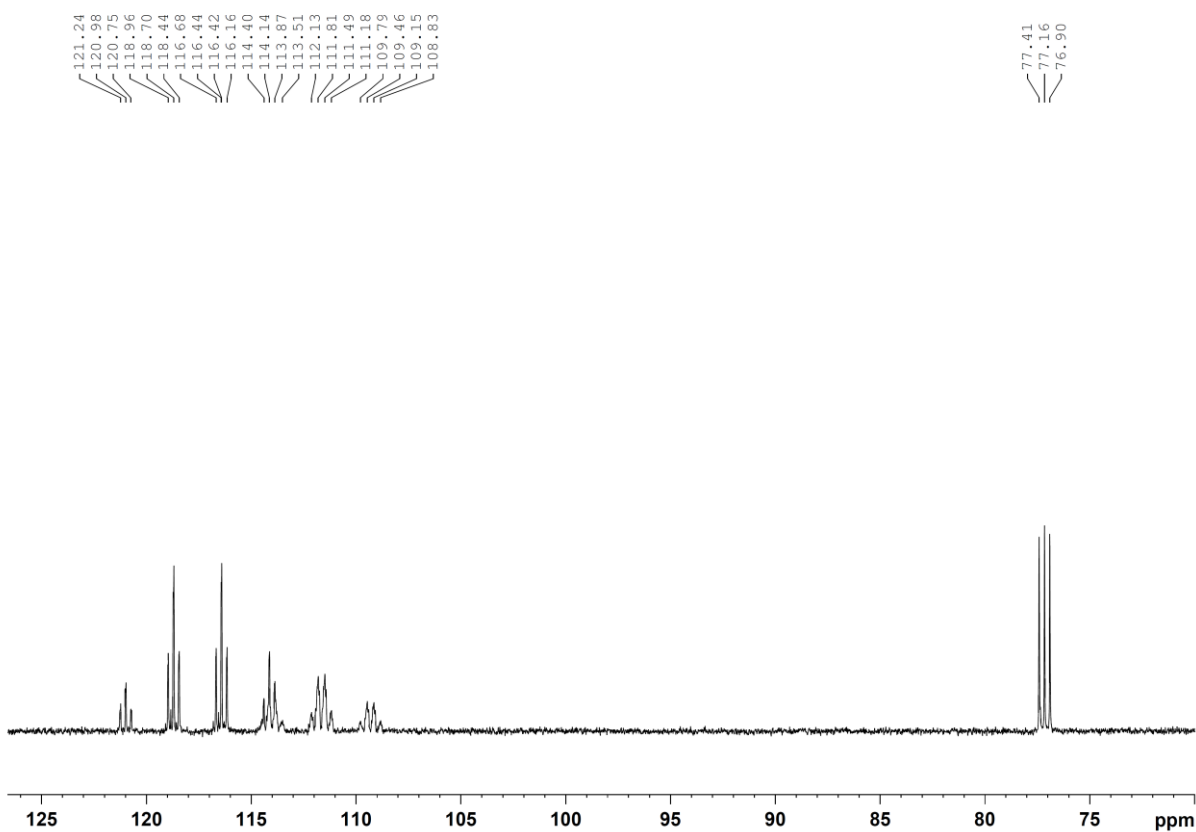

**$^{19}\text{F}$  NMR (S4)**

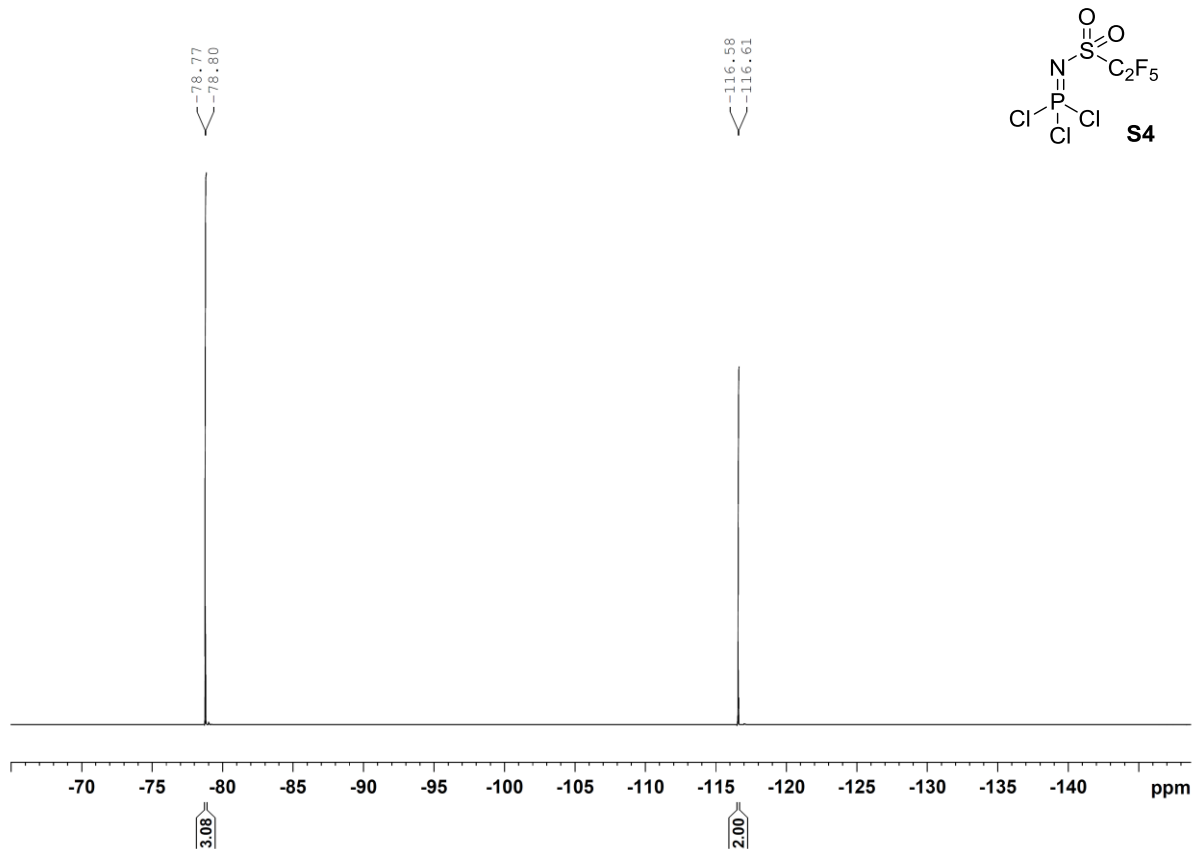

**$^{31}\text{P}$  NMR (S4)**

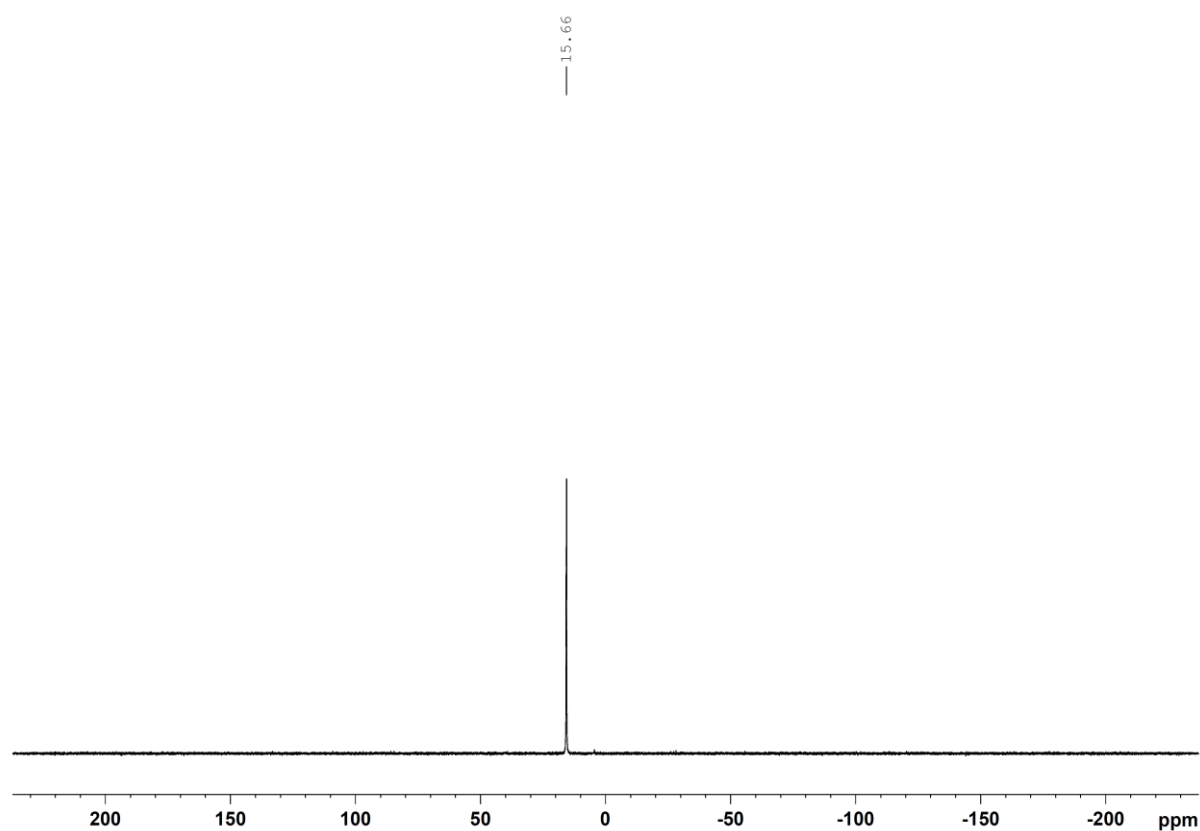

**<sup>1</sup>H NMR (4c)**

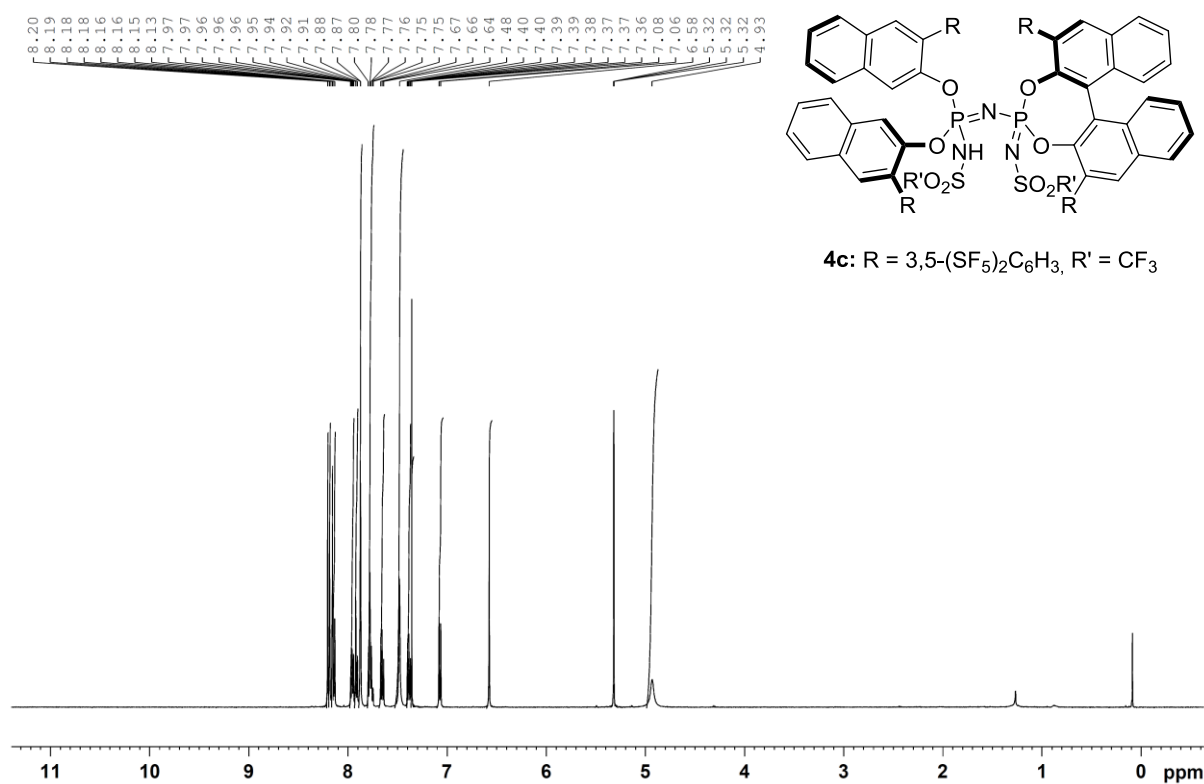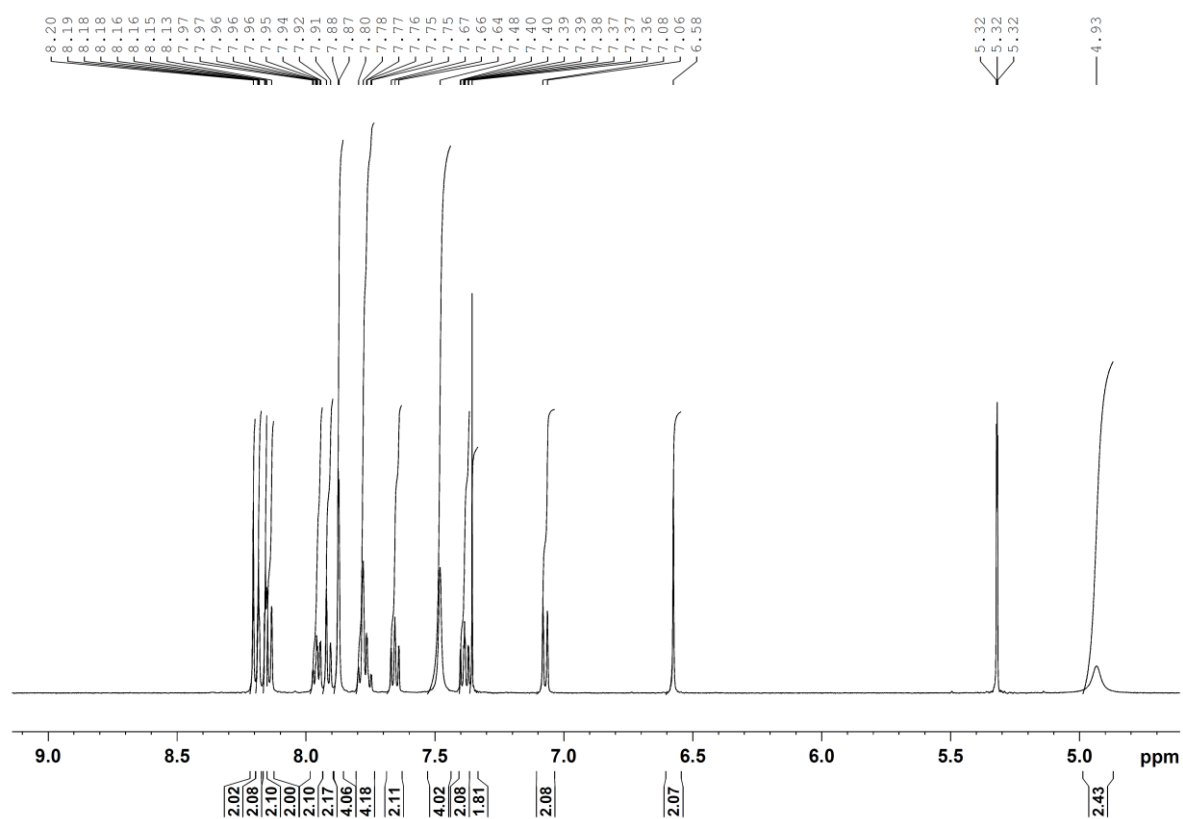

**<sup>13</sup>C NMR (4c)**

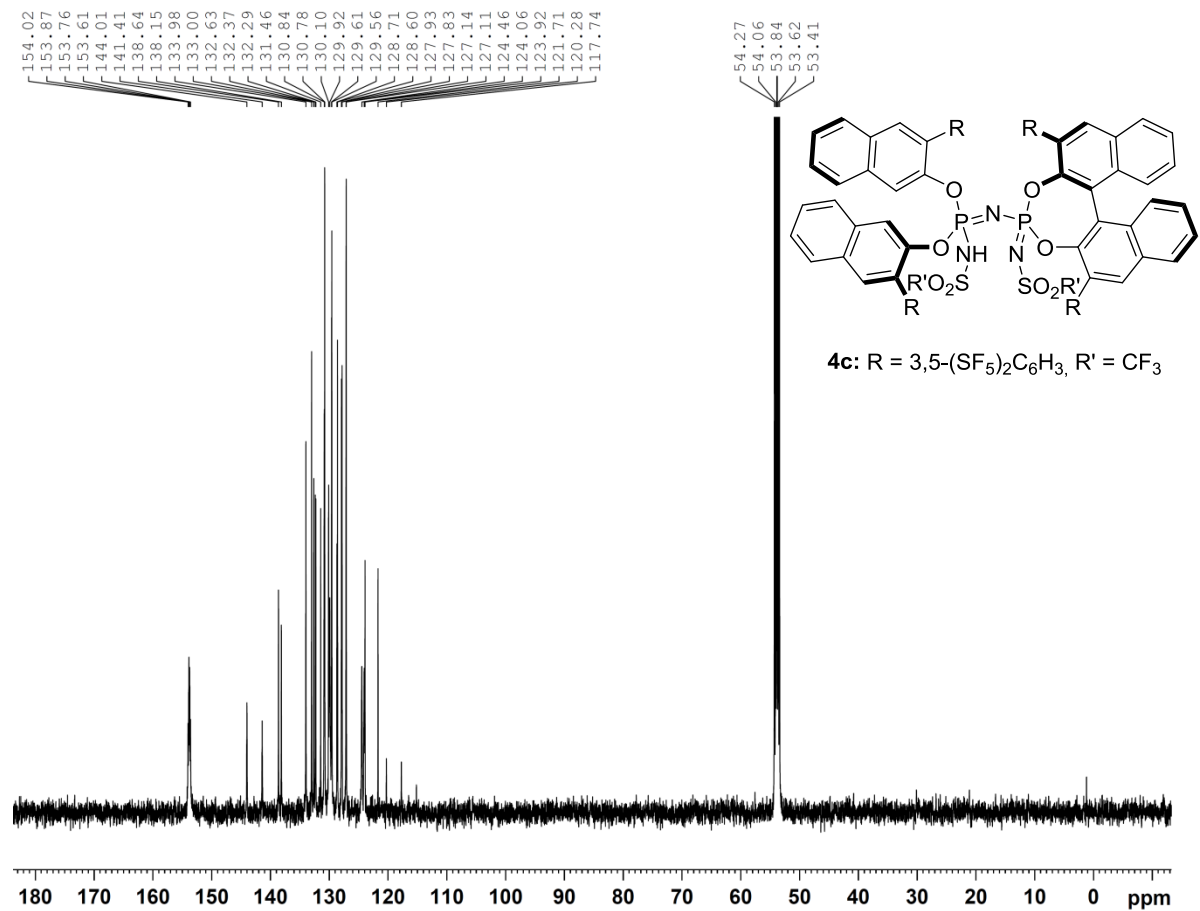

**<sup>9</sup>F NMR (4c)**

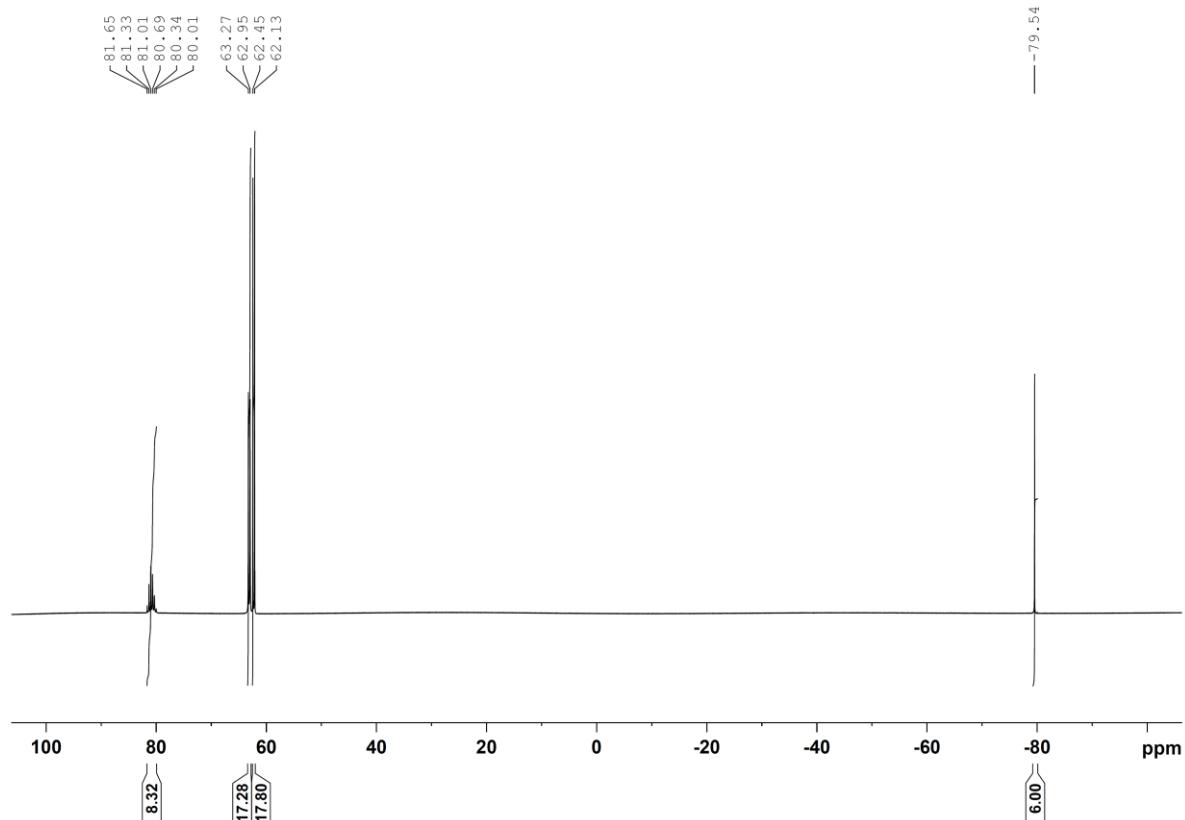

**$^{31}\text{P}$  NMR (4c)**

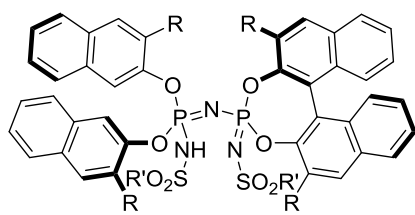

**4c:** R = 3,5-(SF<sub>5</sub>)<sub>2</sub>C<sub>6</sub>H<sub>3</sub>, R' = CF<sub>3</sub>

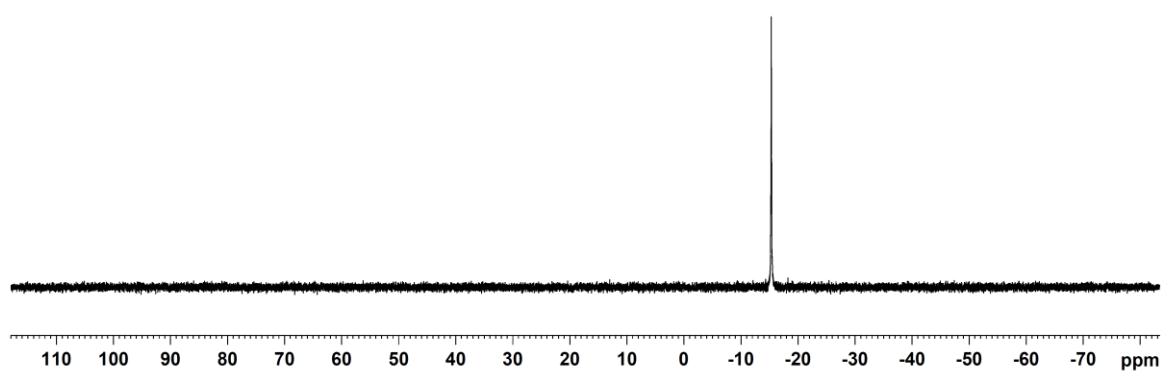

# <sup>1</sup>H NMR (4d)

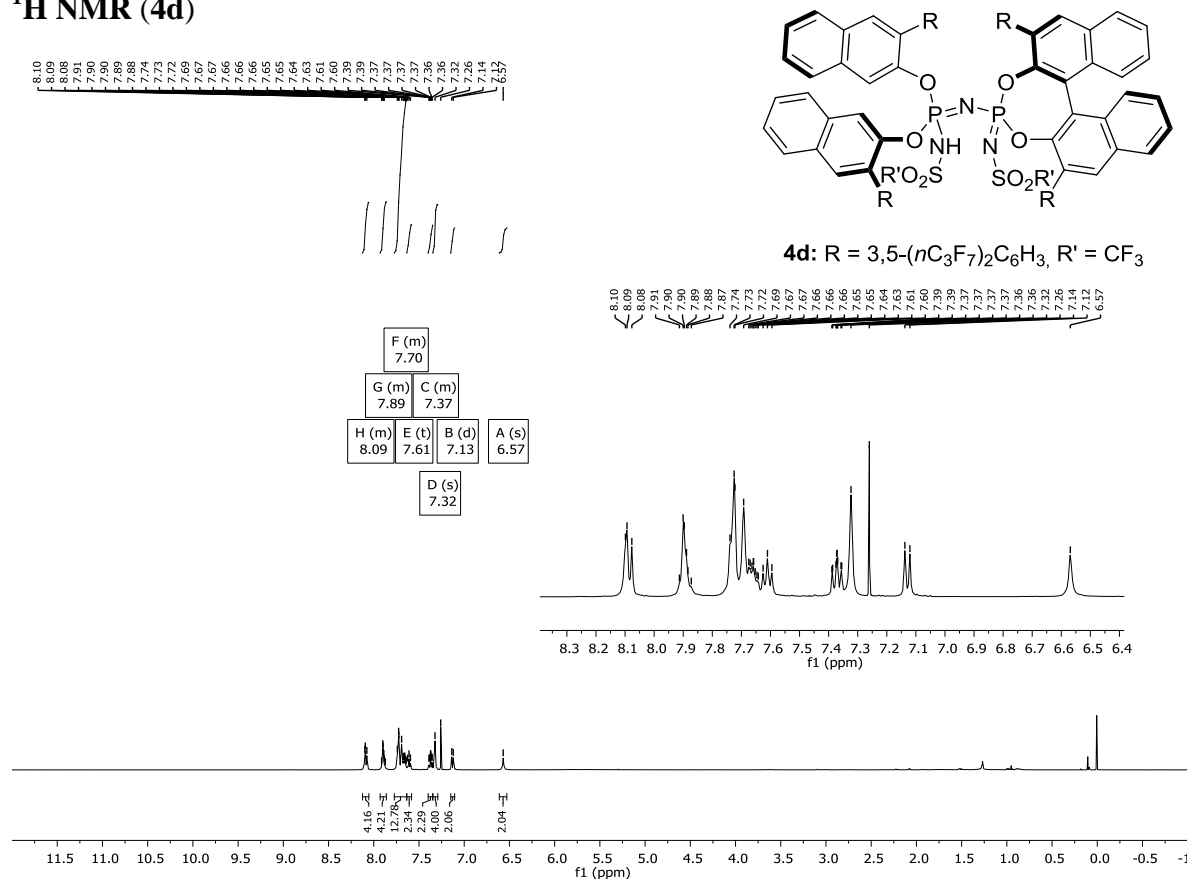

# <sup>13</sup>C NMR (4d)

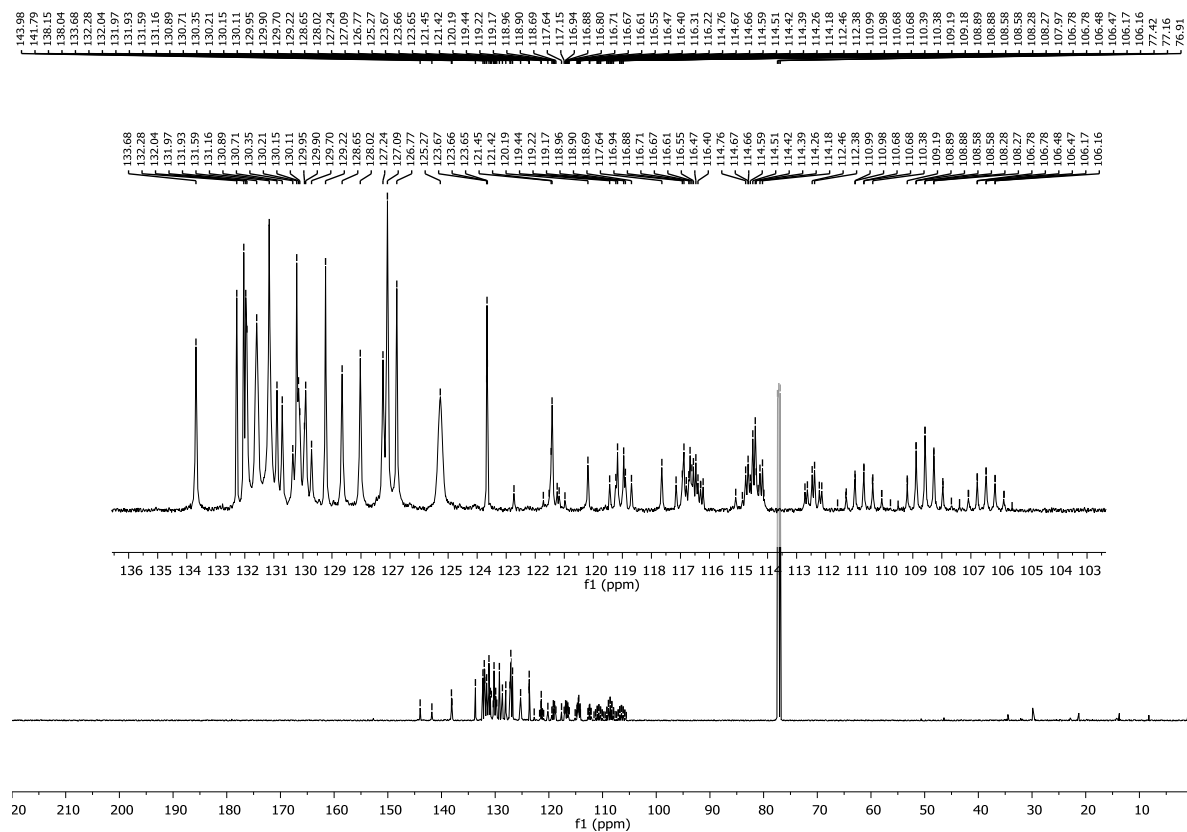

# <sup>13</sup>C NMR (4d)

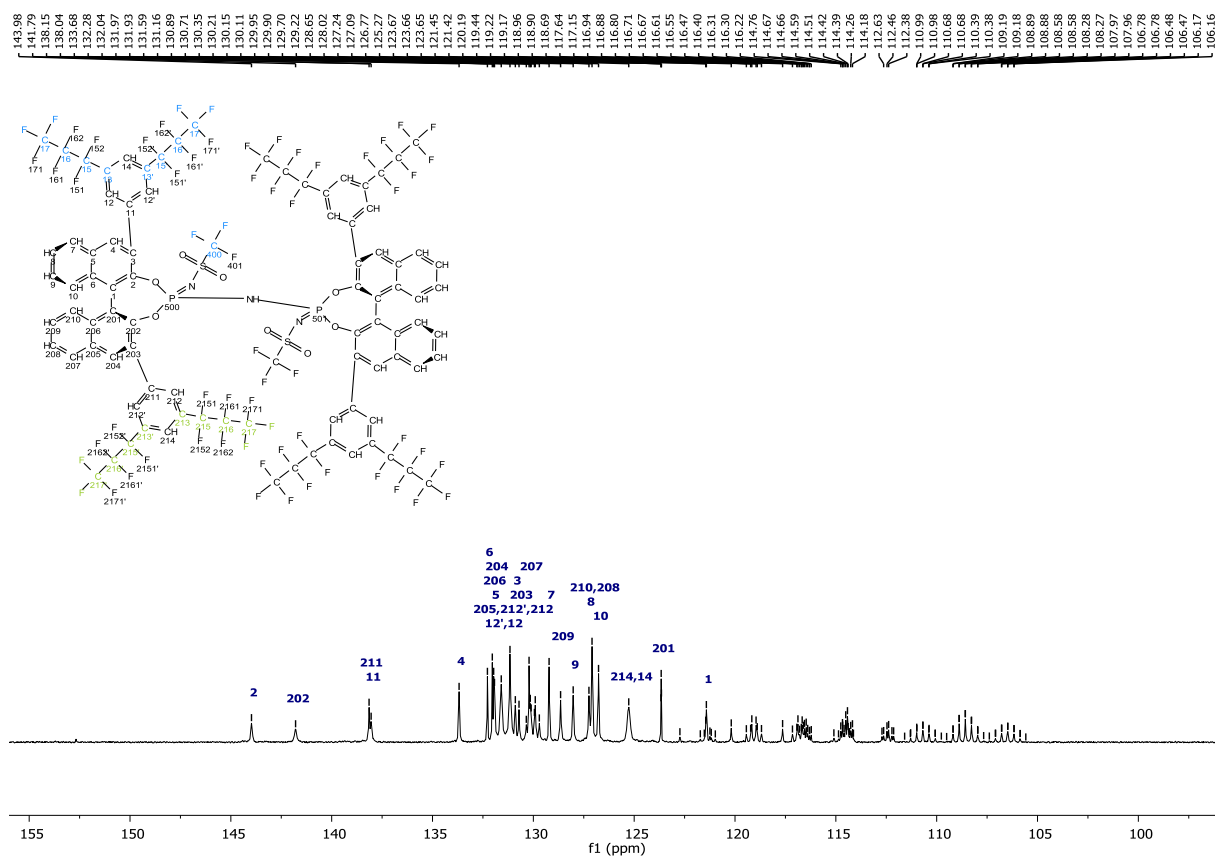

## <sup>13</sup>C NMR (4d) (<sup>1</sup>H, <sup>19</sup>F decoupled; broadband <sup>19</sup>F decoupling)

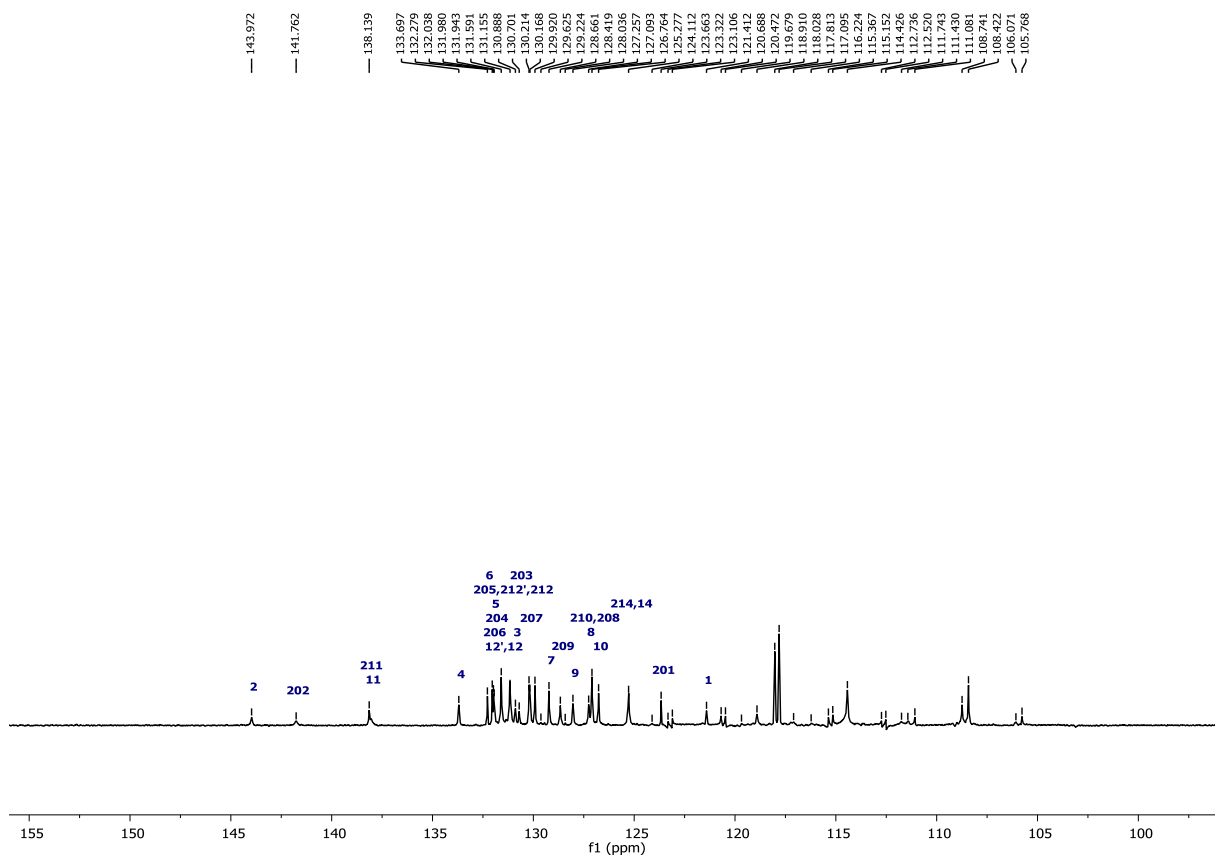

**$^{13}\text{C}$  NMR (4d) ( $^1\text{H}$ ,  $^{19}\text{F}$  decoupled; selective  $^{19}\text{F}$  decoupling for offset  $\delta_{\text{F}} -126.1$ )**

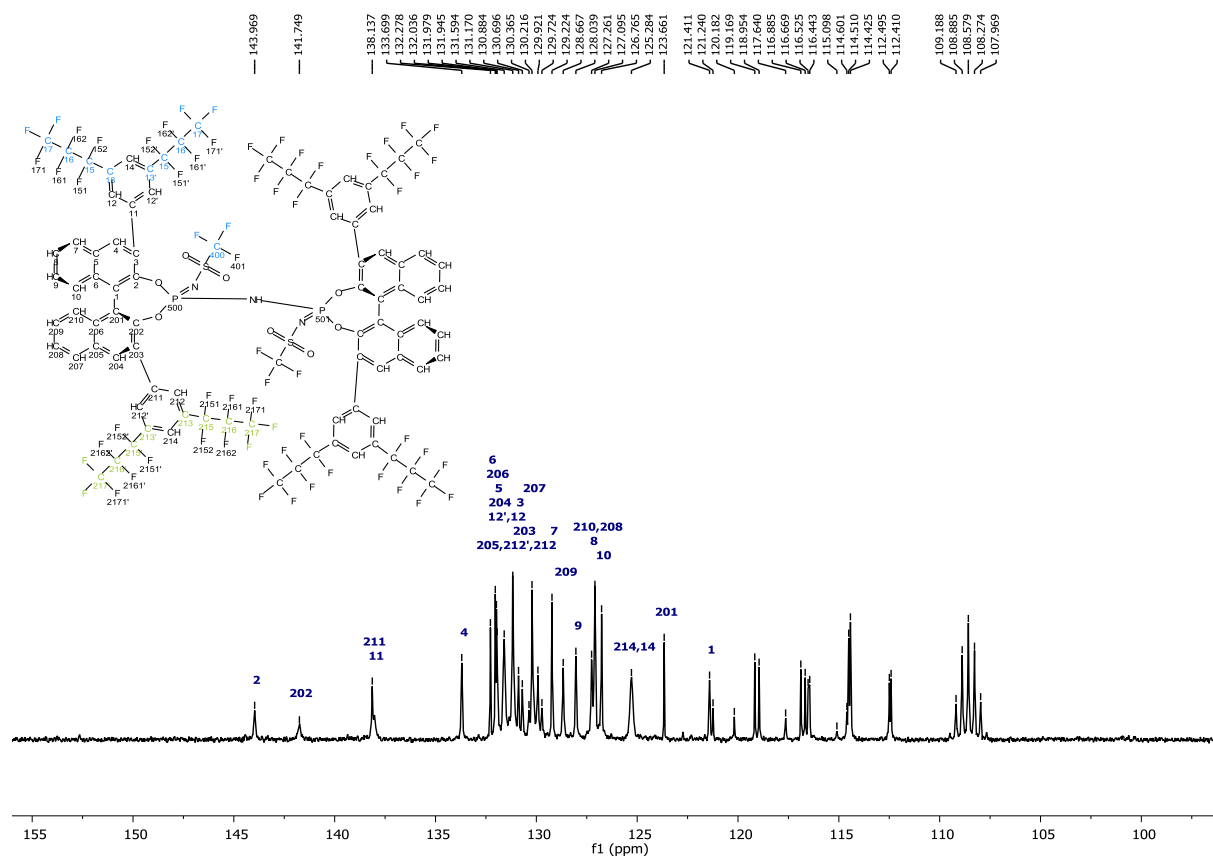

**$^{13}\text{C}$  NMR (4d) ( $^1\text{H}$ ,  $^{19}\text{F}$  decoupled; selective  $^{19}\text{F}$  decoupling for offset  $\delta_{\text{F}} -112.5$ )**

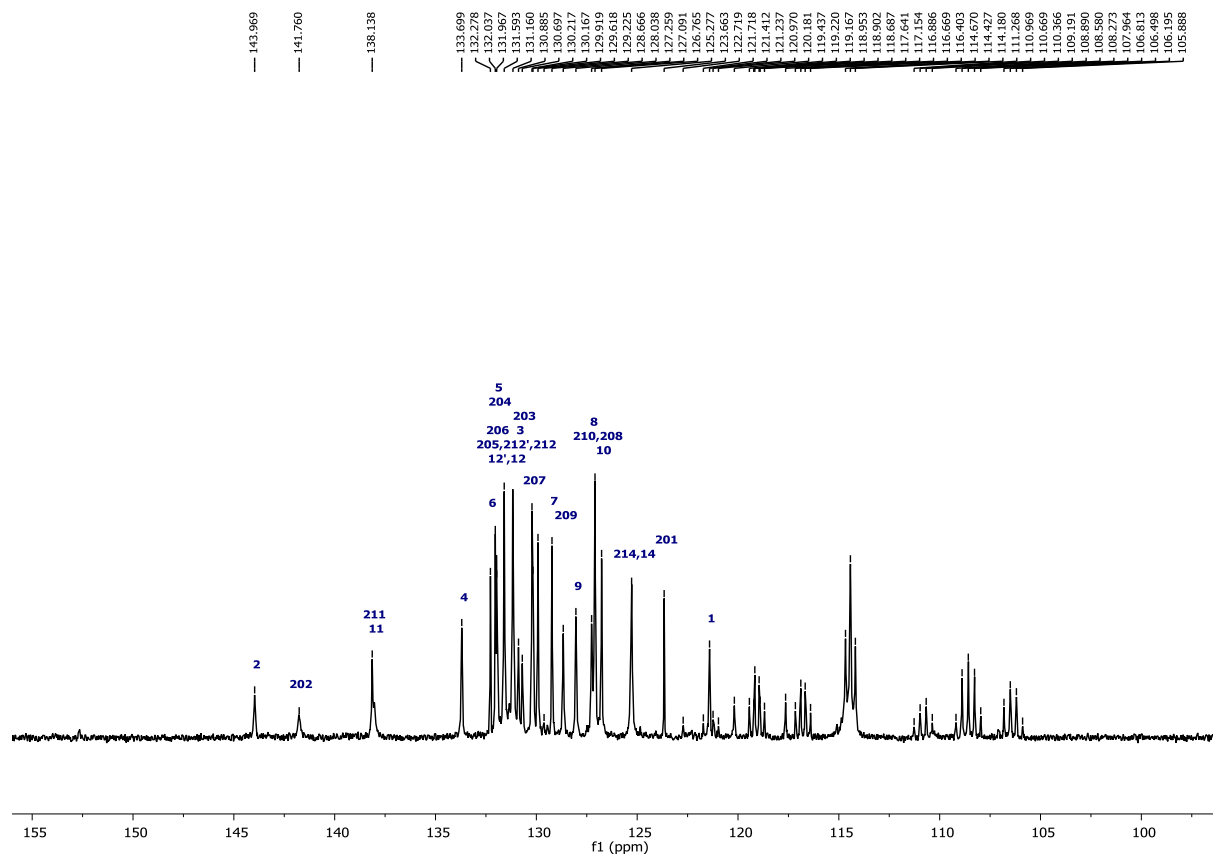



**<sup>1</sup>H NMR spectrum (400 MHz, CDCl<sub>3</sub>)**

Chemical structure of compound 1 is shown above the spectrum. The structure is a complex molecule with multiple aromatic rings, a central phosphorus atom, and various functional groups. The atoms are labeled with numbers corresponding to the peak assignments in the spectrum.

**<sup>13</sup>C NMR spectrum (100 MHz, CDCl<sub>3</sub>)**

Chemical structure of compound 1 is shown above the spectrum. The structure is a complex molecule with multiple aromatic rings, a central phosphorus atom, and various functional groups. The atoms are labeled with numbers corresponding to the peak assignments in the spectrum.

**$^{31}\text{P}$  NMR (4d)**

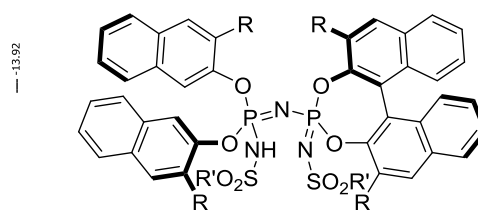

**4d:** R = 3,5-(*n*C<sub>3</sub>F<sub>7</sub>)<sub>2</sub>C<sub>6</sub>H<sub>3</sub>, R' = CF<sub>3</sub>

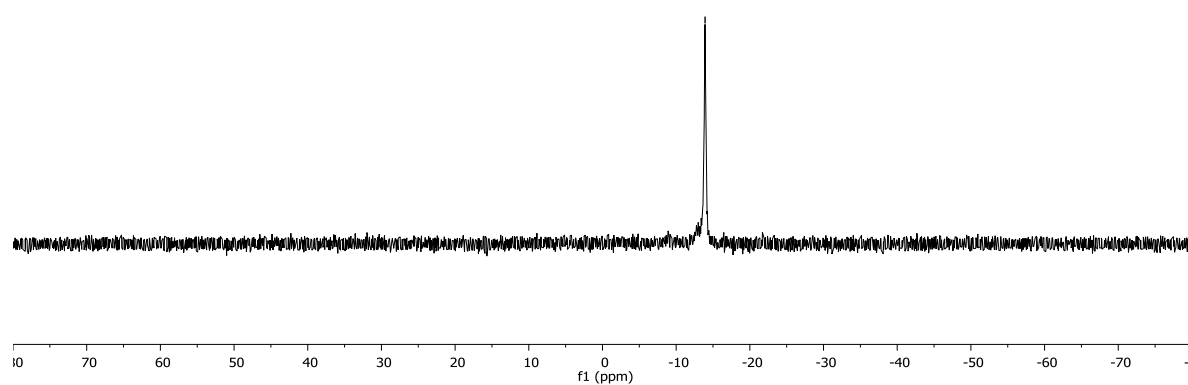

# <sup>1</sup>H NMR (4e)

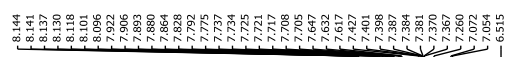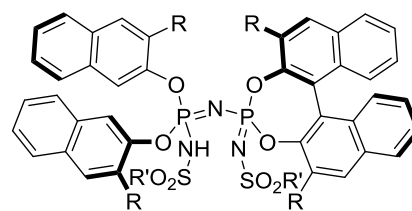

**4e:** R = 3,5-(SF<sub>5</sub>)<sub>2</sub>C<sub>6</sub>H<sub>3</sub>, R' = C<sub>2</sub>F<sub>5</sub>

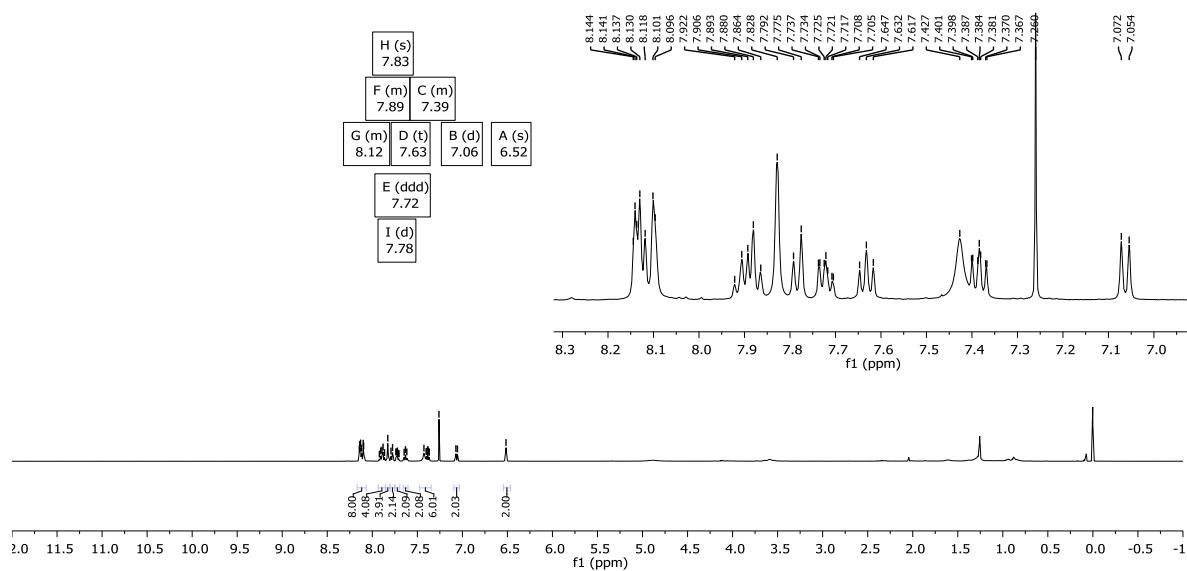

# <sup>13</sup>C NMR (4e)

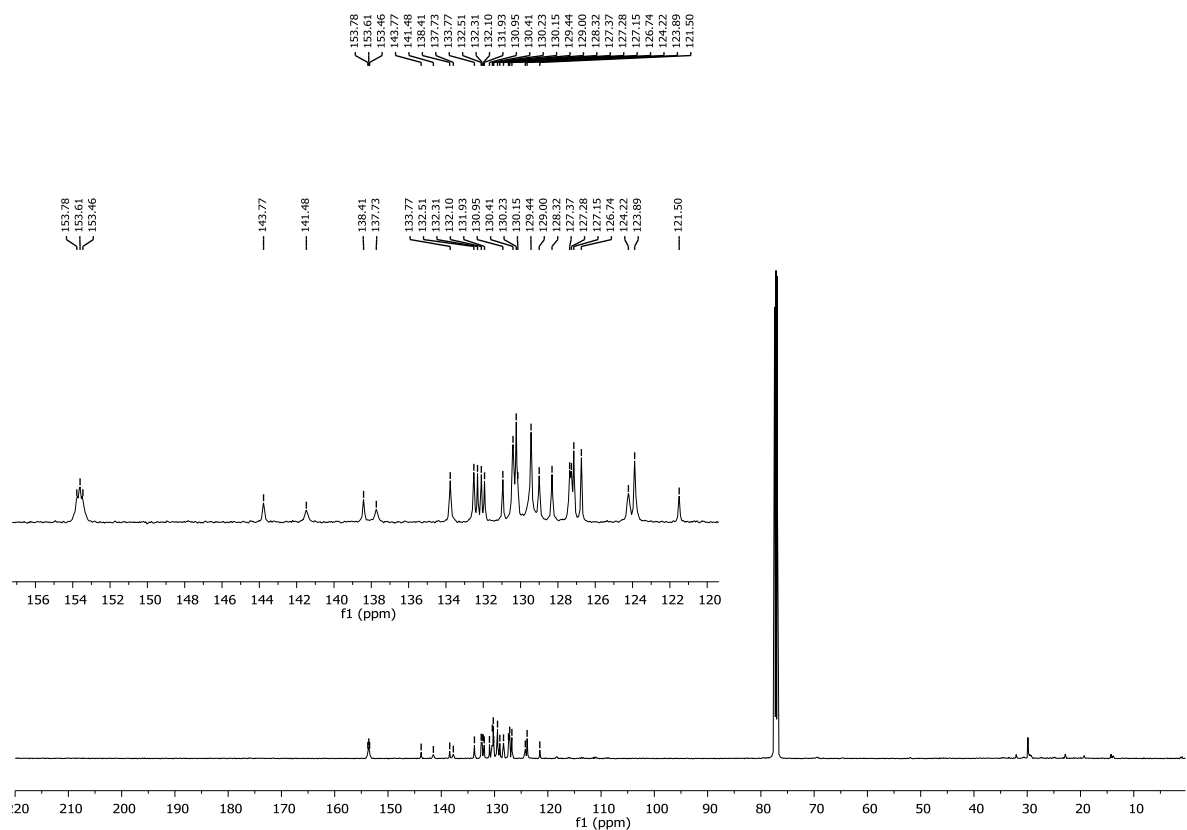

# <sup>13</sup>C NMR (4e)

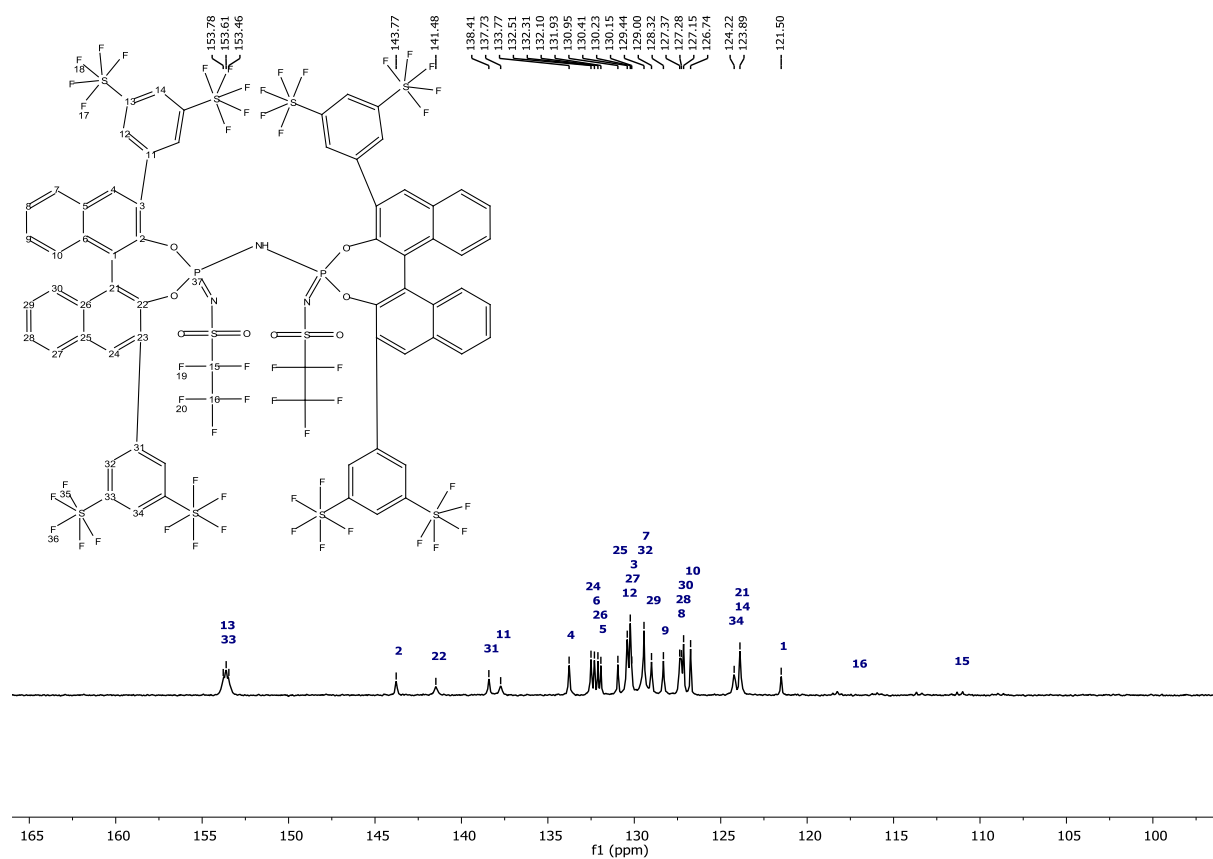

## <sup>13</sup>C NMR (4e) (<sup>1</sup>H, <sup>19</sup>F decoupled; selective <sup>19</sup>F decoupling for offset $\delta_F$ -117.00)

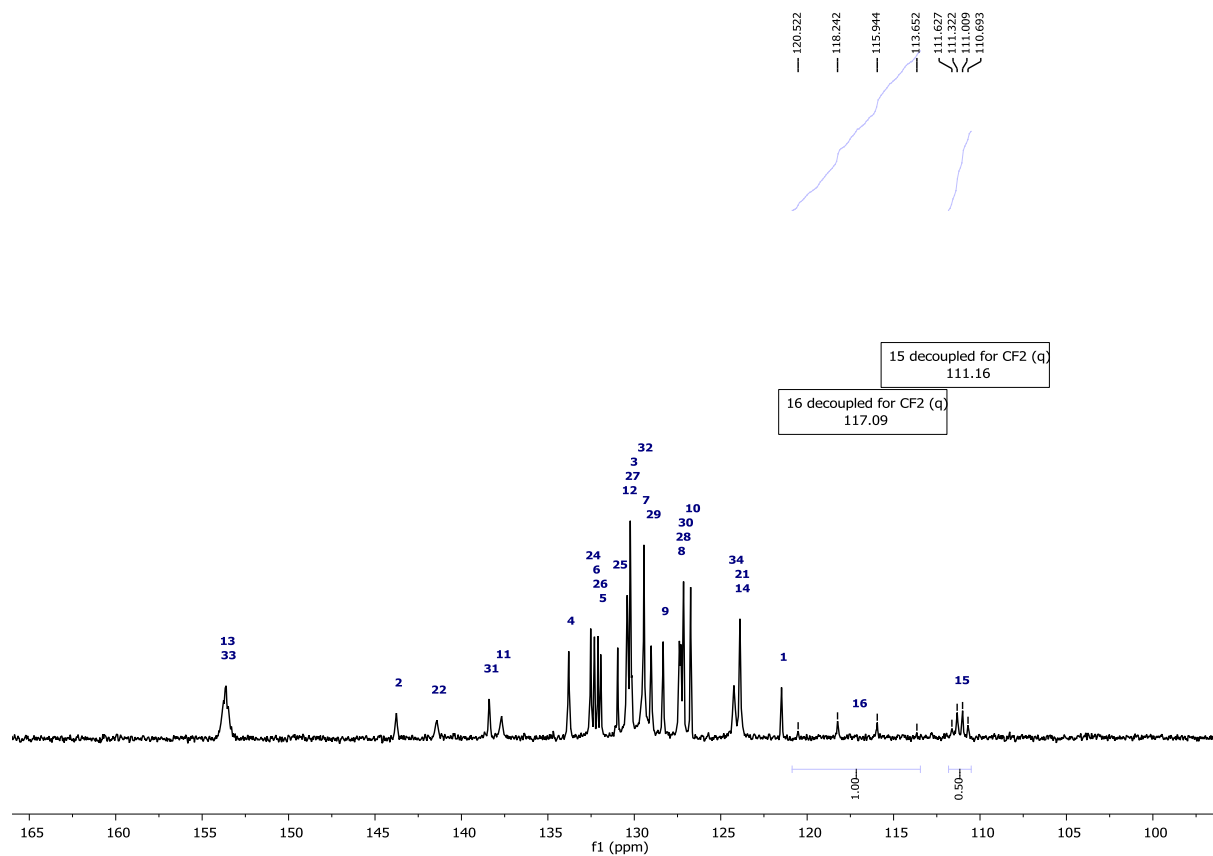

**$^{13}\text{C}$  NMR (4e) ( $^1\text{H}$ ,  $^{19}\text{F}$  decoupled; selective  $^{19}\text{F}$  decoupling for offset  $\delta_{\text{F}} -79.00$ )**

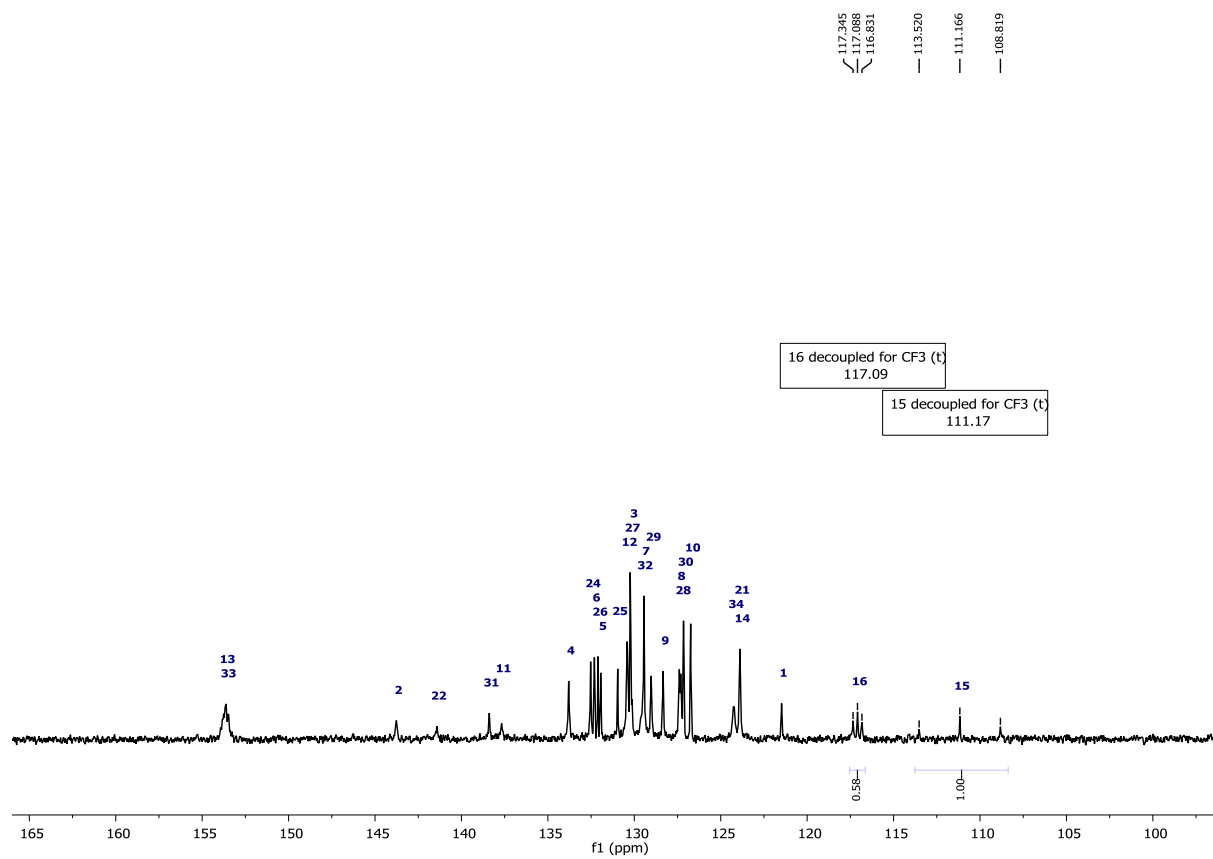

**$^{13}\text{C}$  NMR (4e) ( $^1\text{H}$ ,  $^{19}\text{F}$  decoupled; selective  $^{19}\text{F}$  decoupling for offset  $\delta_{\text{F}} 63.35$ )**

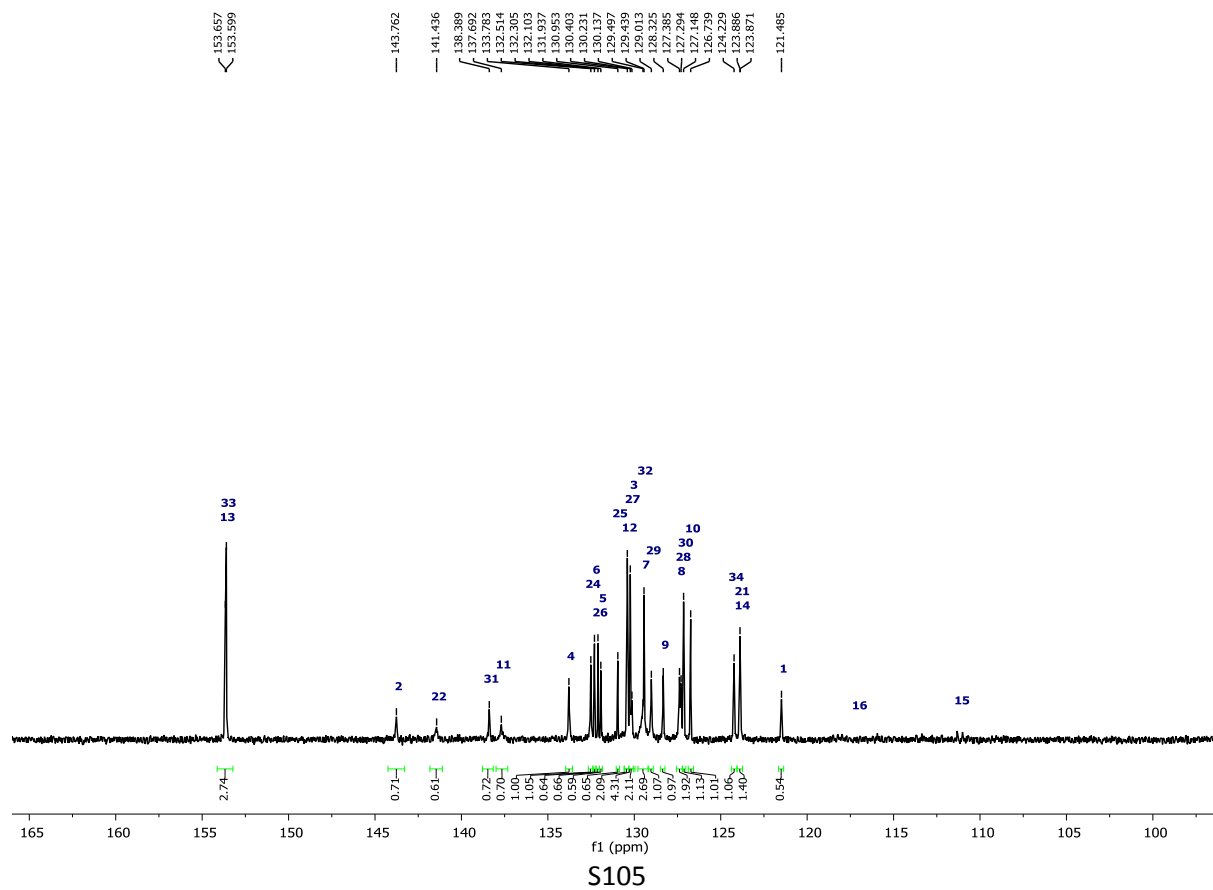

**$^{19}\text{F}$  NMR (4e)**

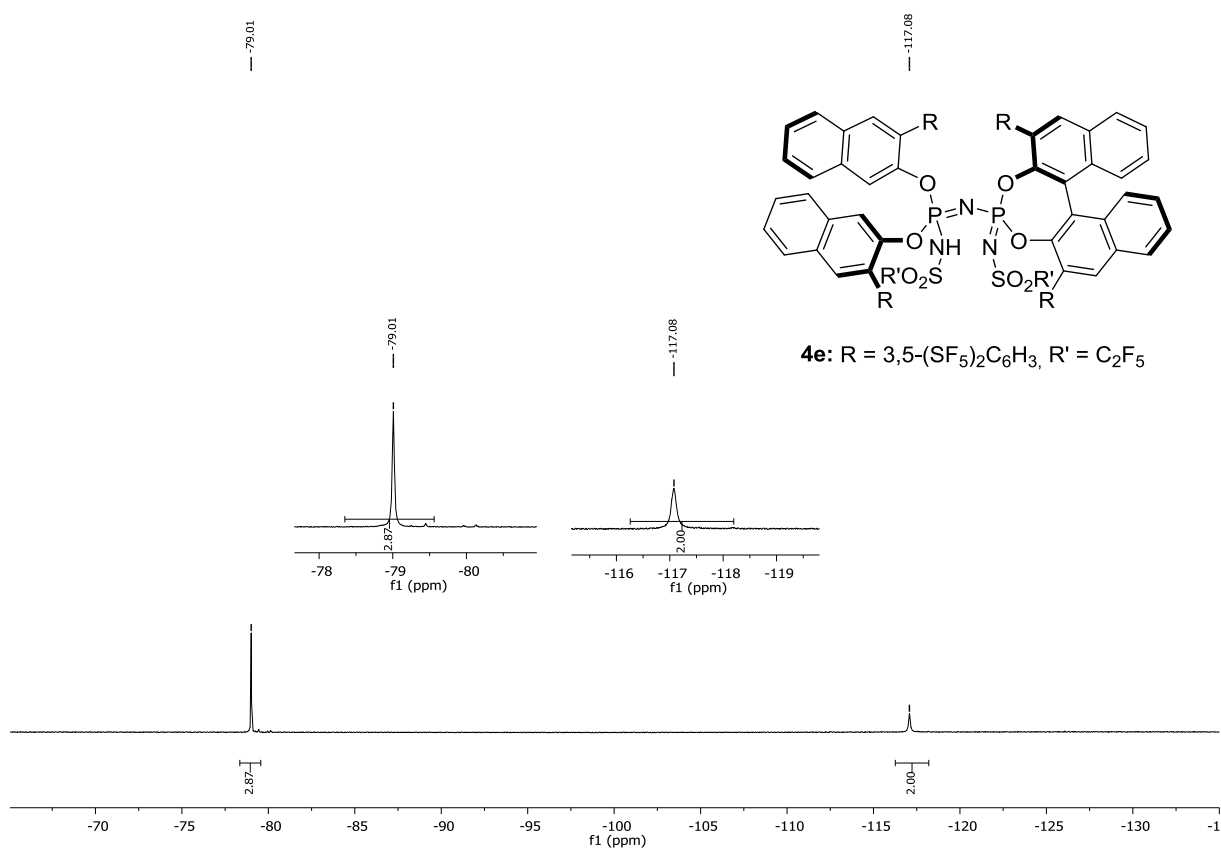

**$^{19}\text{F}$  NMR (4e)**

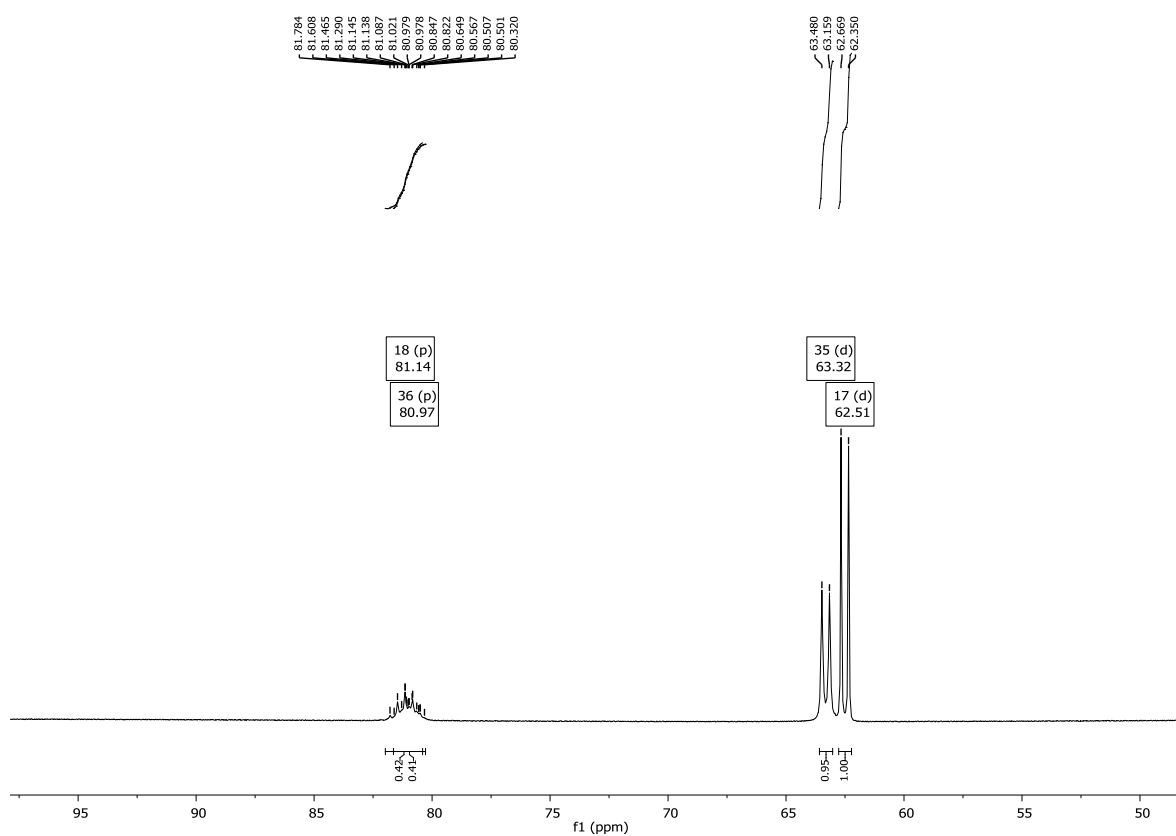

**$^{31}\text{P}$  NMR (4e)**

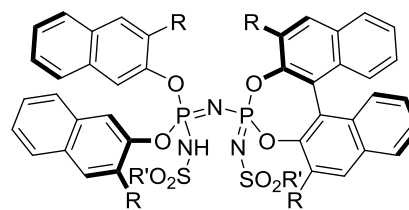

**4e:**  $\text{R} = 3,5\text{-(SF}_5)_2\text{C}_6\text{H}_3$ ,  $\text{R}' = \text{C}_2\text{F}_5$

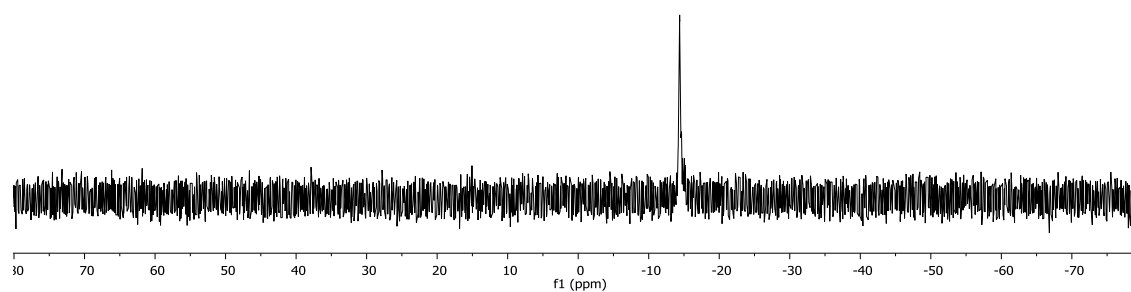

# <sup>1</sup>H NMR (4f)

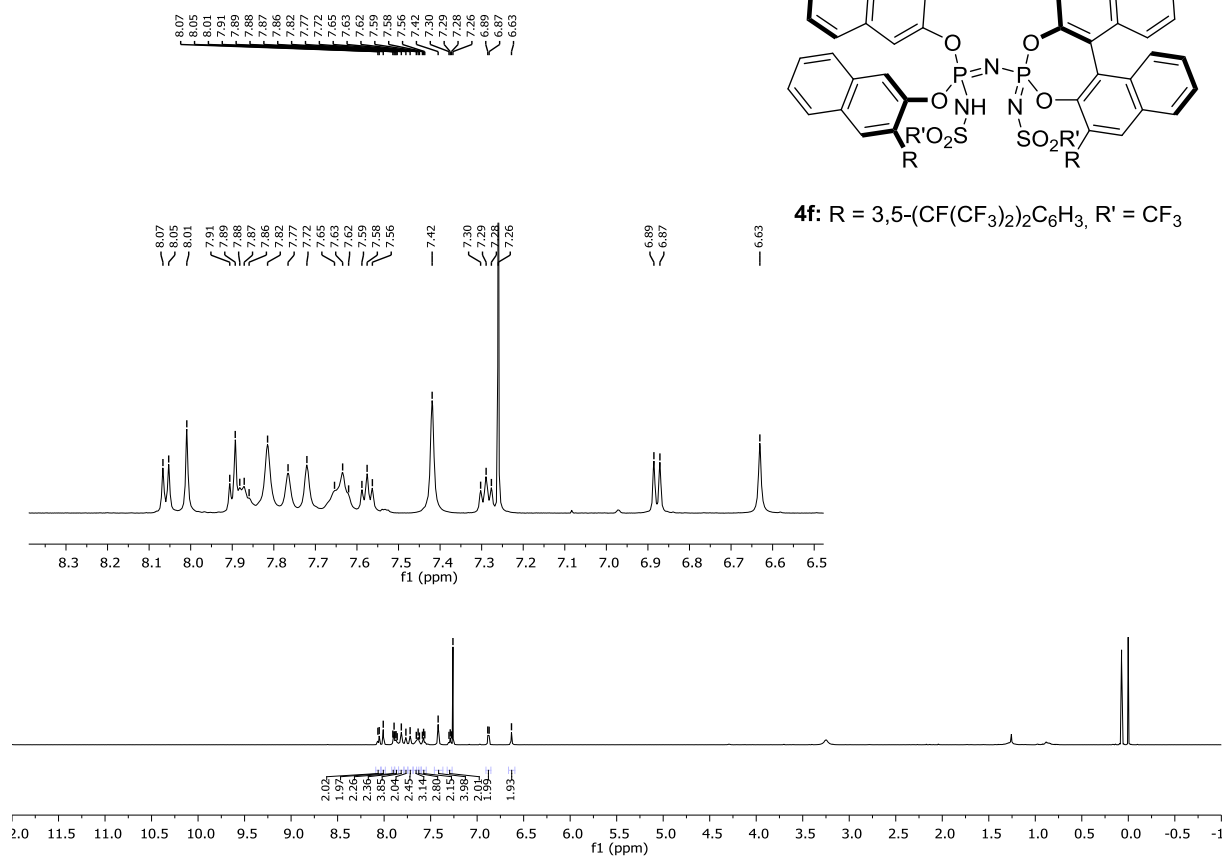

# <sup>13</sup>C NMR (4f)

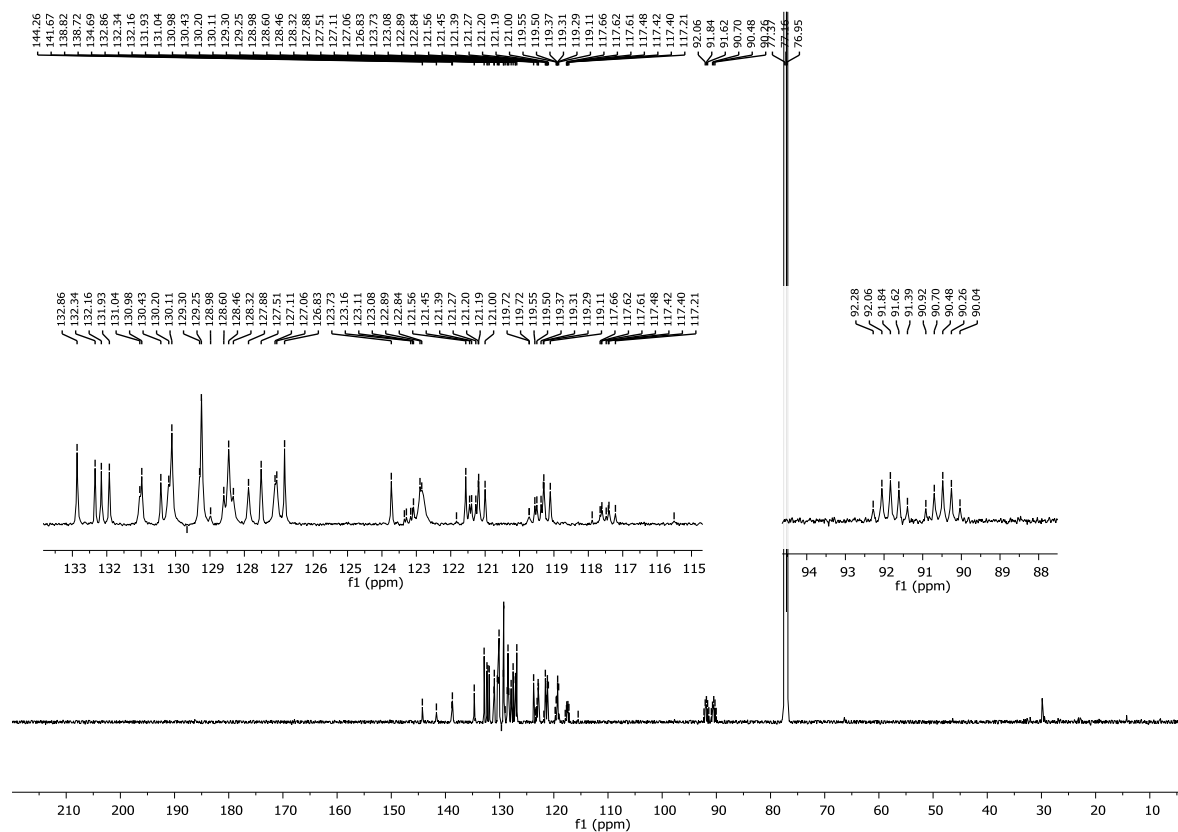



**$^{13}\text{C}$  NMR (4f)**

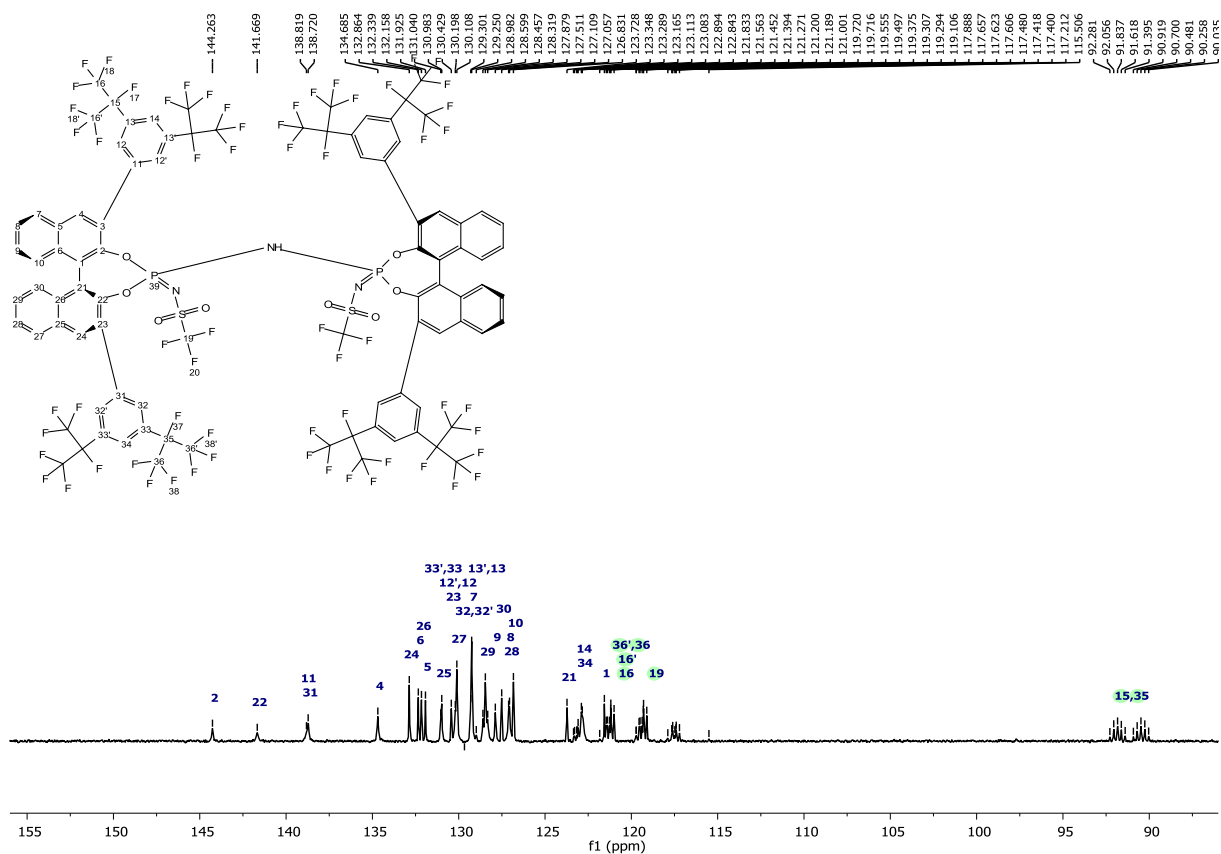

# <sup>19</sup>F NMR (4f)

-74.79  
-75.30  
-75.92  
-76.11  
-79.29

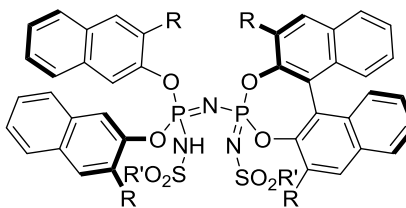

-181.21  
-182.75

4f: R = 3,5-(CF(CF<sub>3</sub>)<sub>2</sub>)<sub>2</sub>C<sub>6</sub>H<sub>3</sub>, R' = CF<sub>3</sub>

-74.79  
-75.30  
-75.92  
-76.11

-79.29

-181.21

-182.75

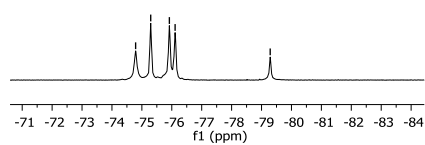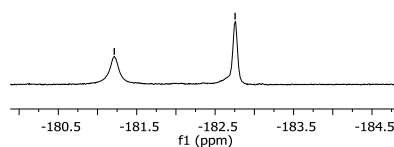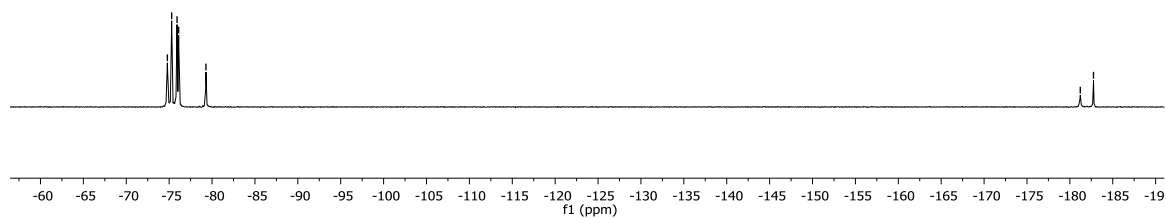

# <sup>31</sup>P NMR (4f)

-14.31

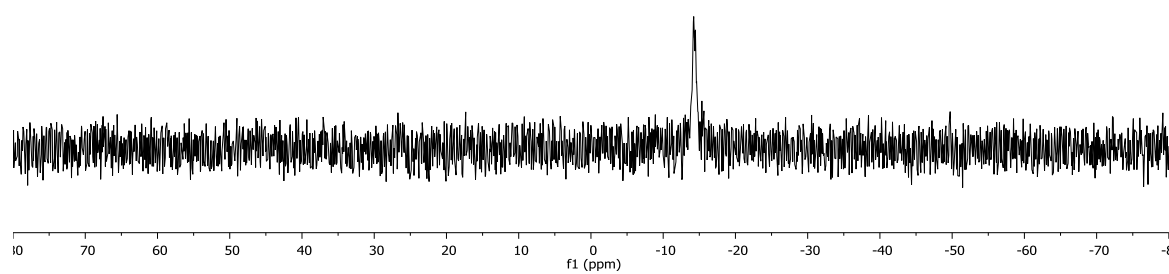

# <sup>1</sup>H NMR ((R)-1I)

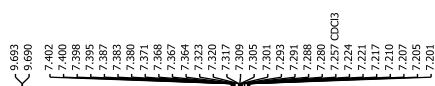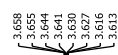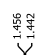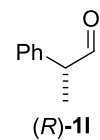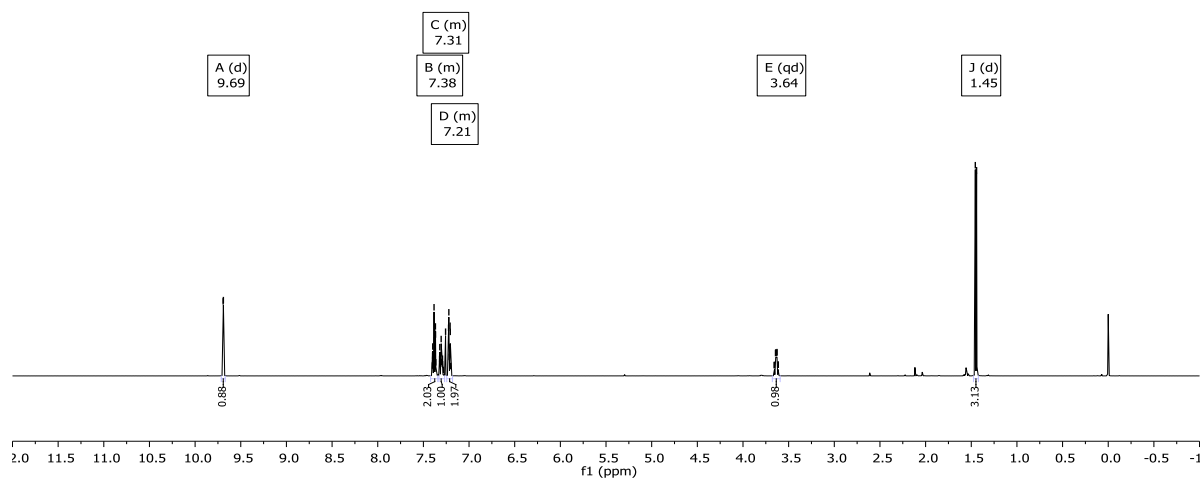

# <sup>13</sup>C NMR ((R)-1I)

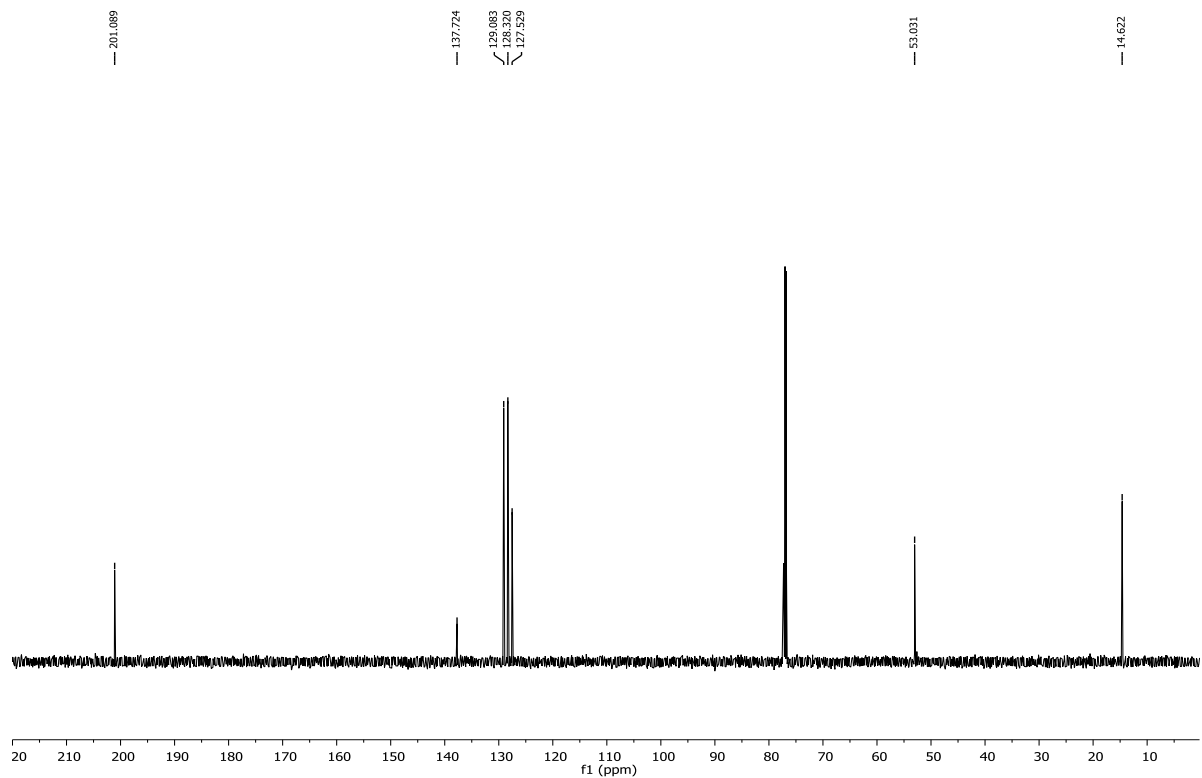

# <sup>1</sup>H NMR ((S)-1I)

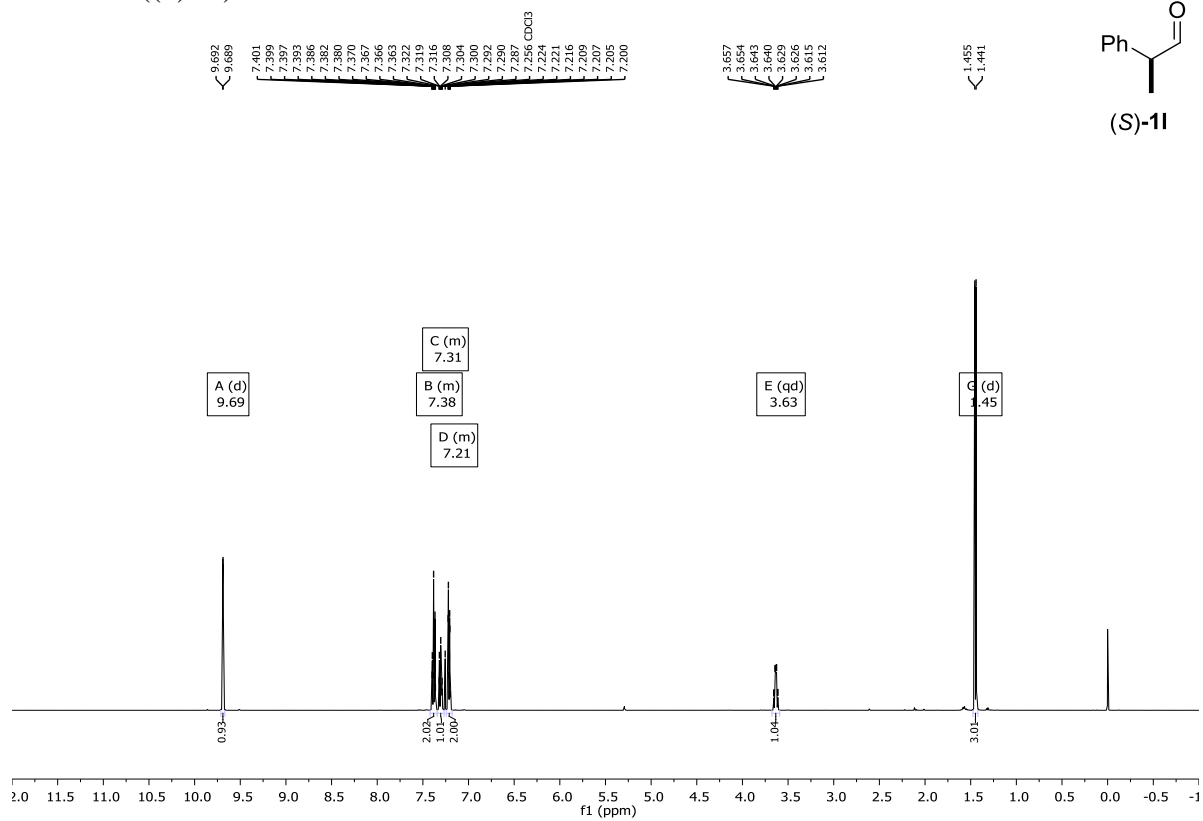

# <sup>13</sup>C NMR ((S)-1I)

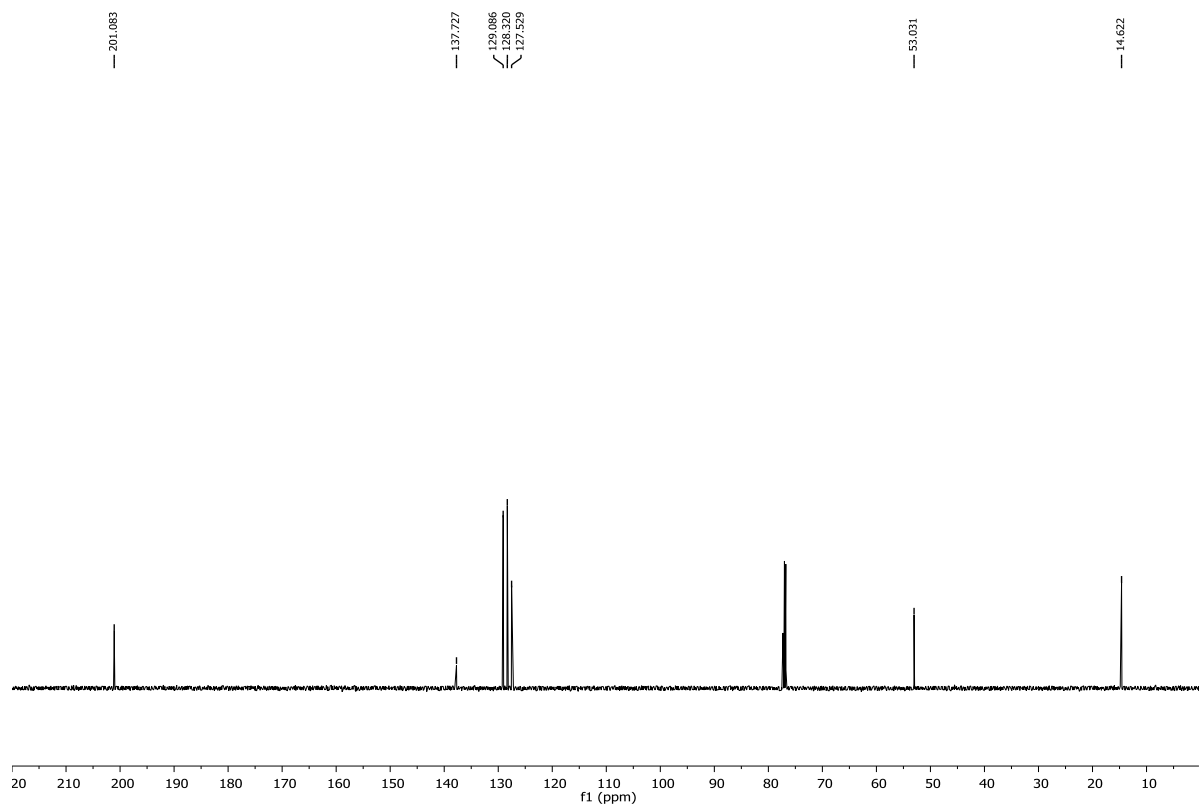

# <sup>1</sup>H NMR (1s)

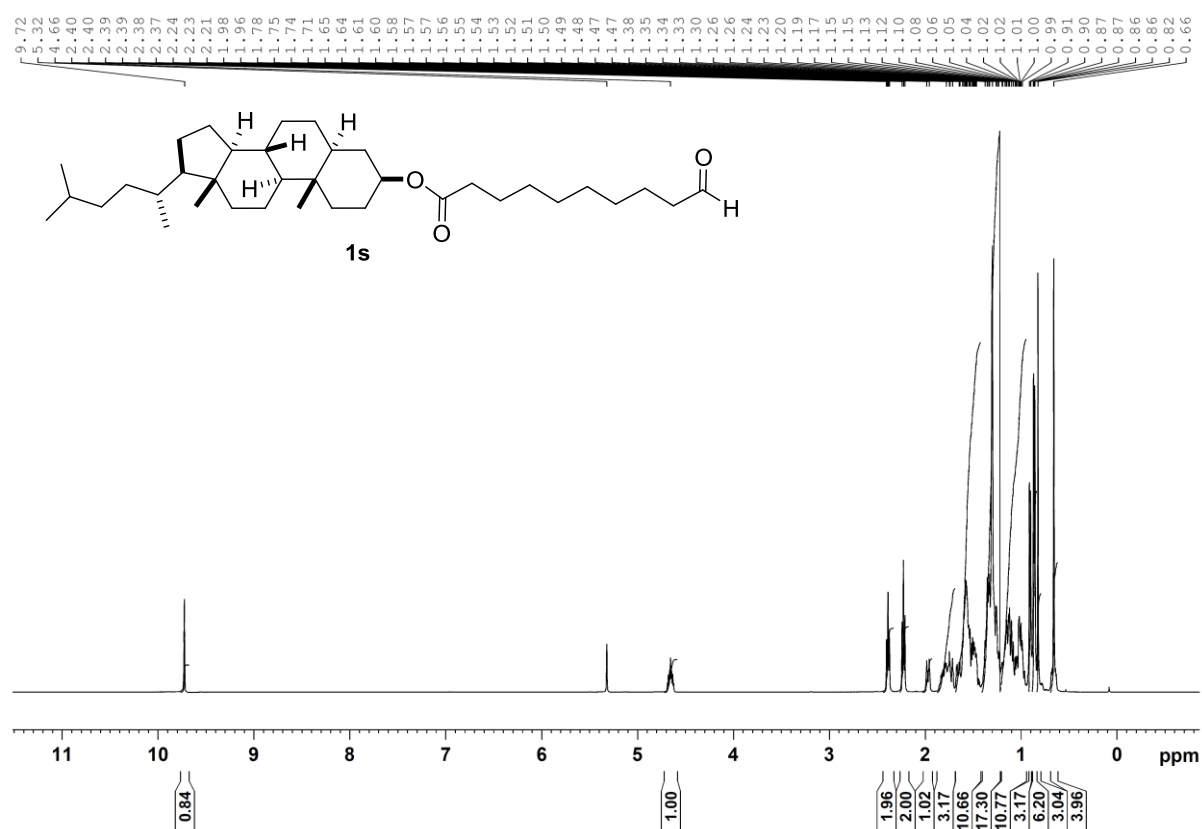

# <sup>13</sup>C NMR (1s)

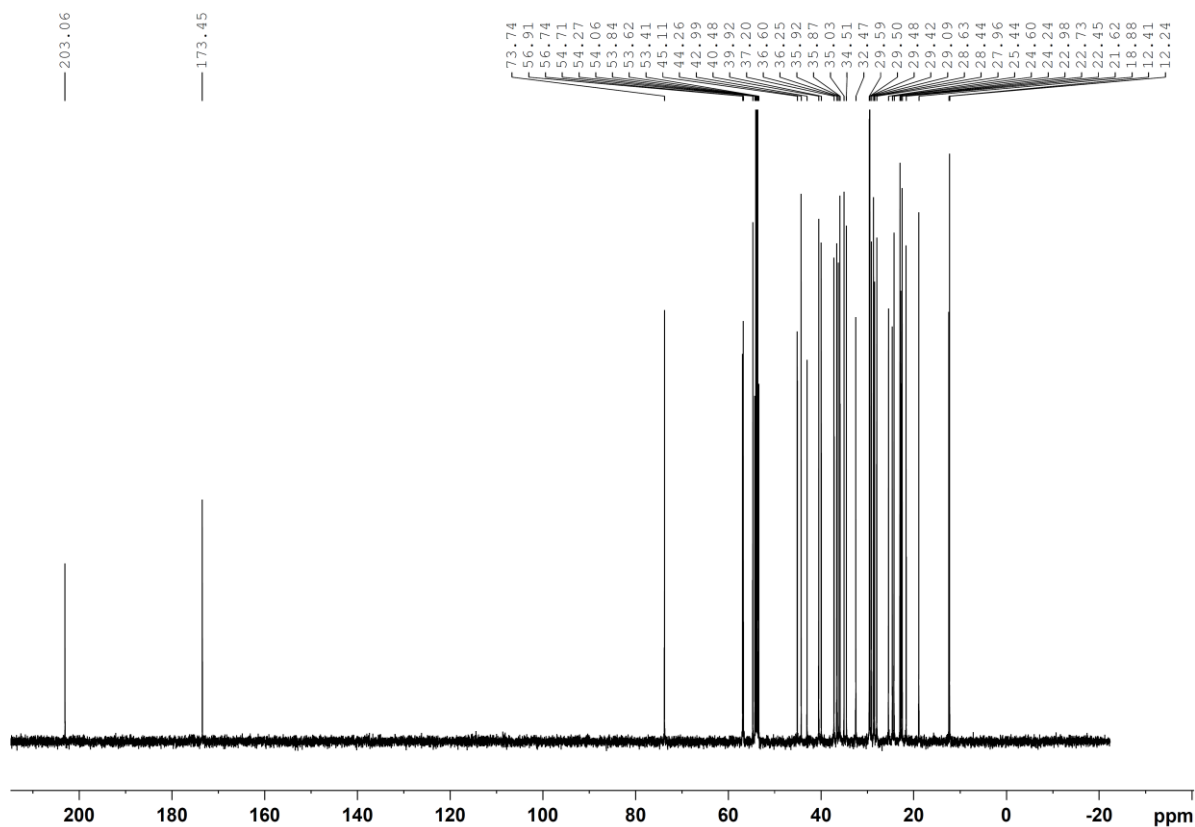

**<sup>1</sup>H NMR (2k)**

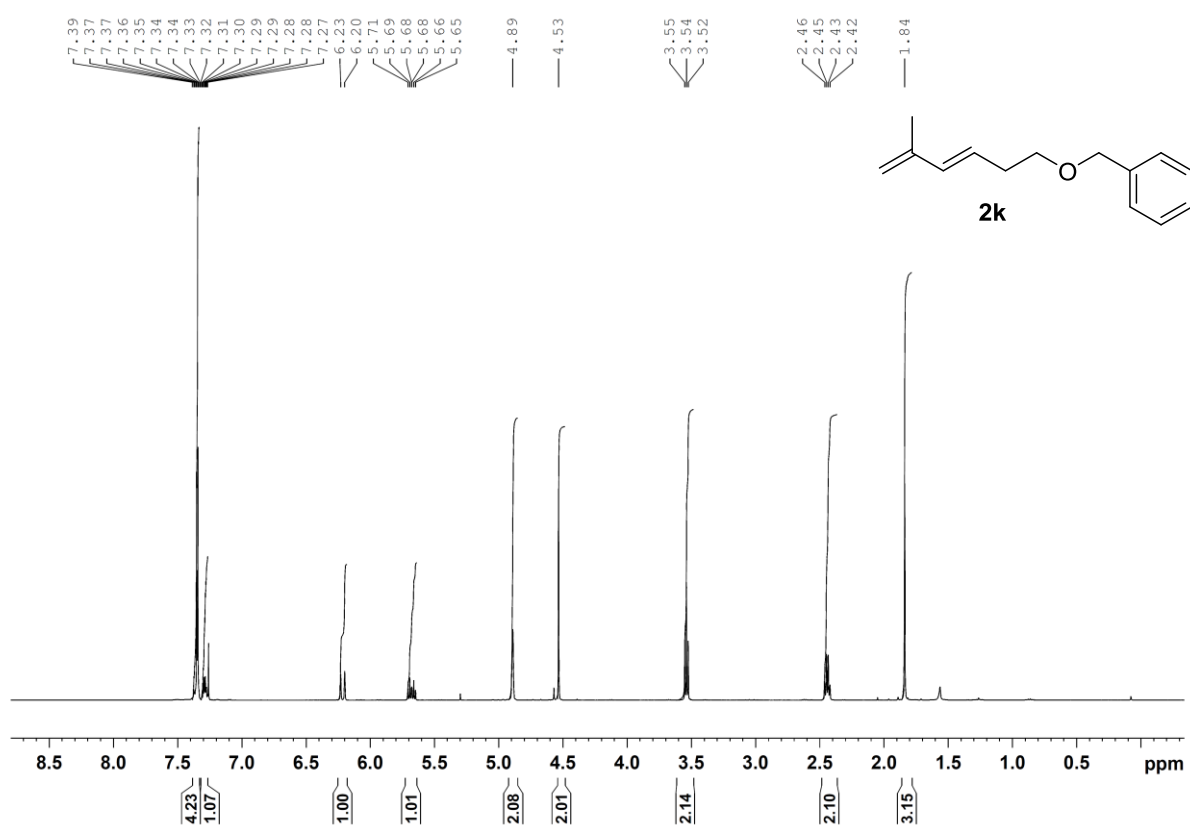

**<sup>13</sup>C NMR (2k)**

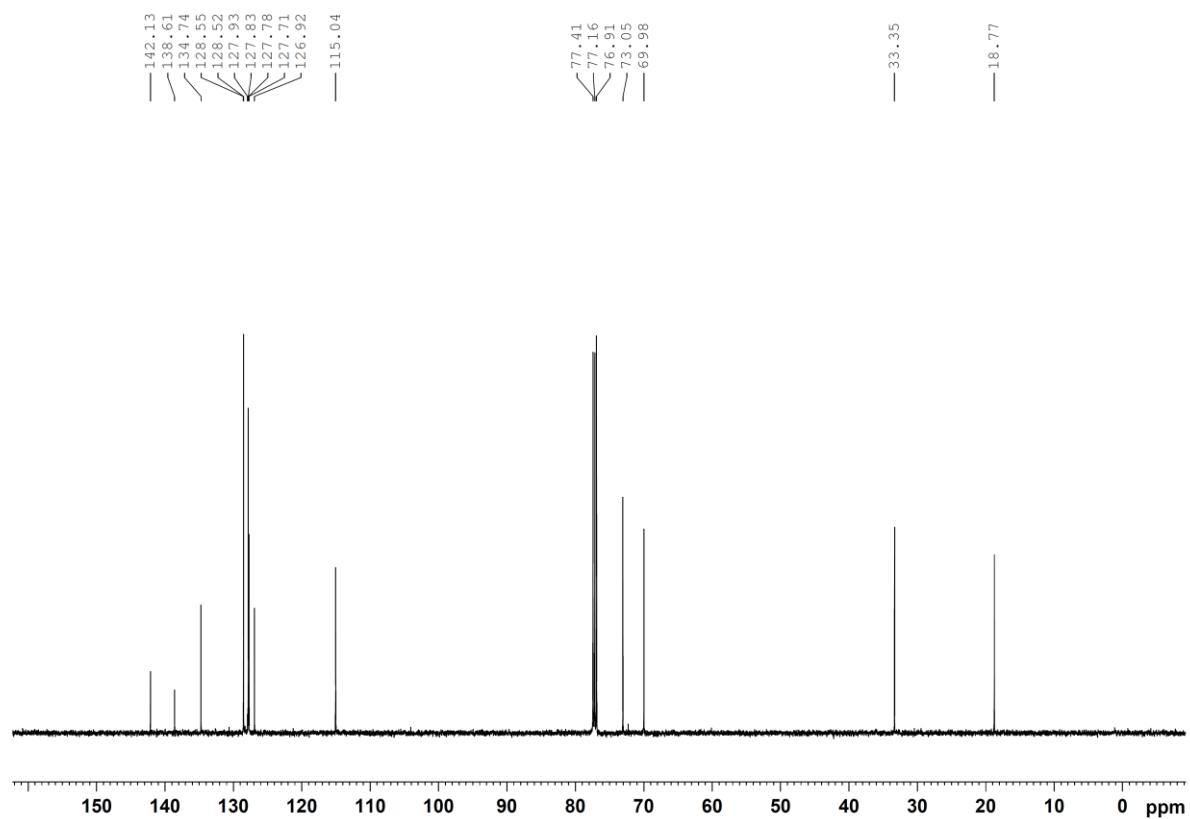

**<sup>1</sup>H NMR (3a)**

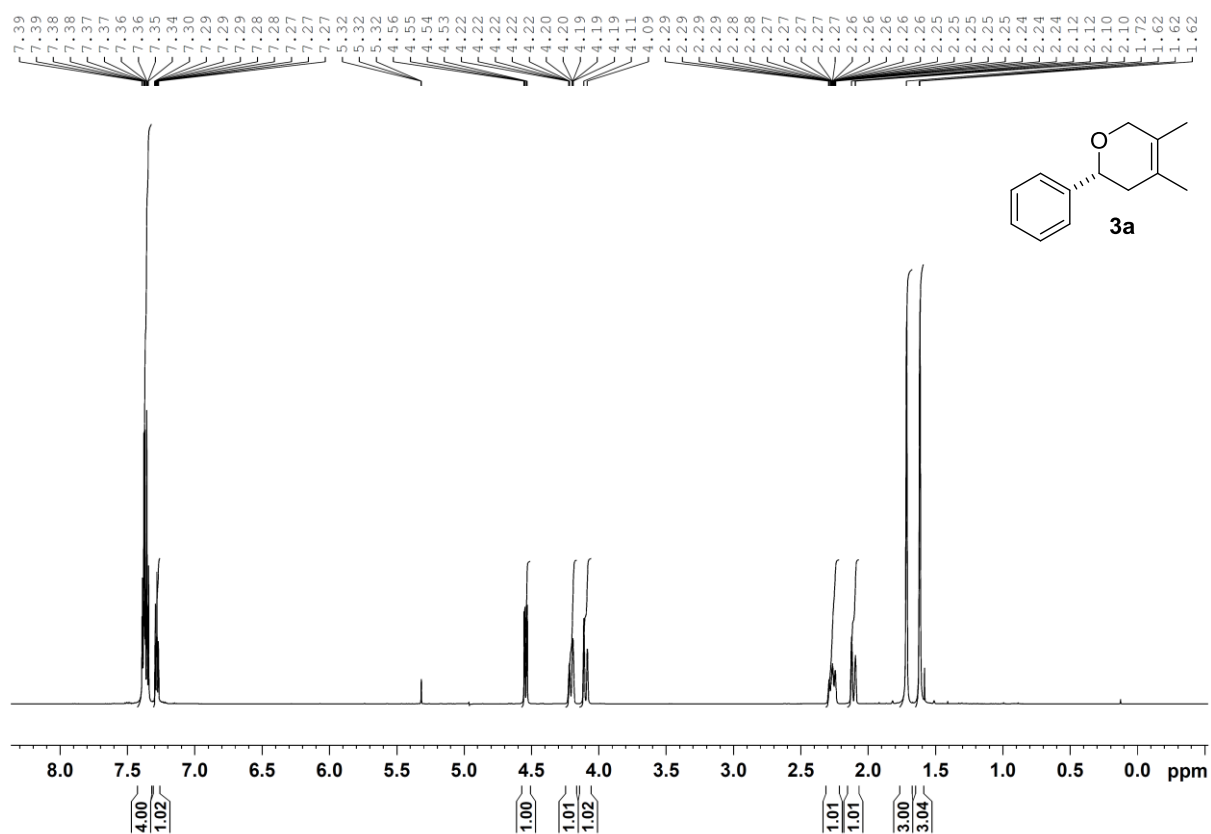

**<sup>13</sup>C NMR (3a)**

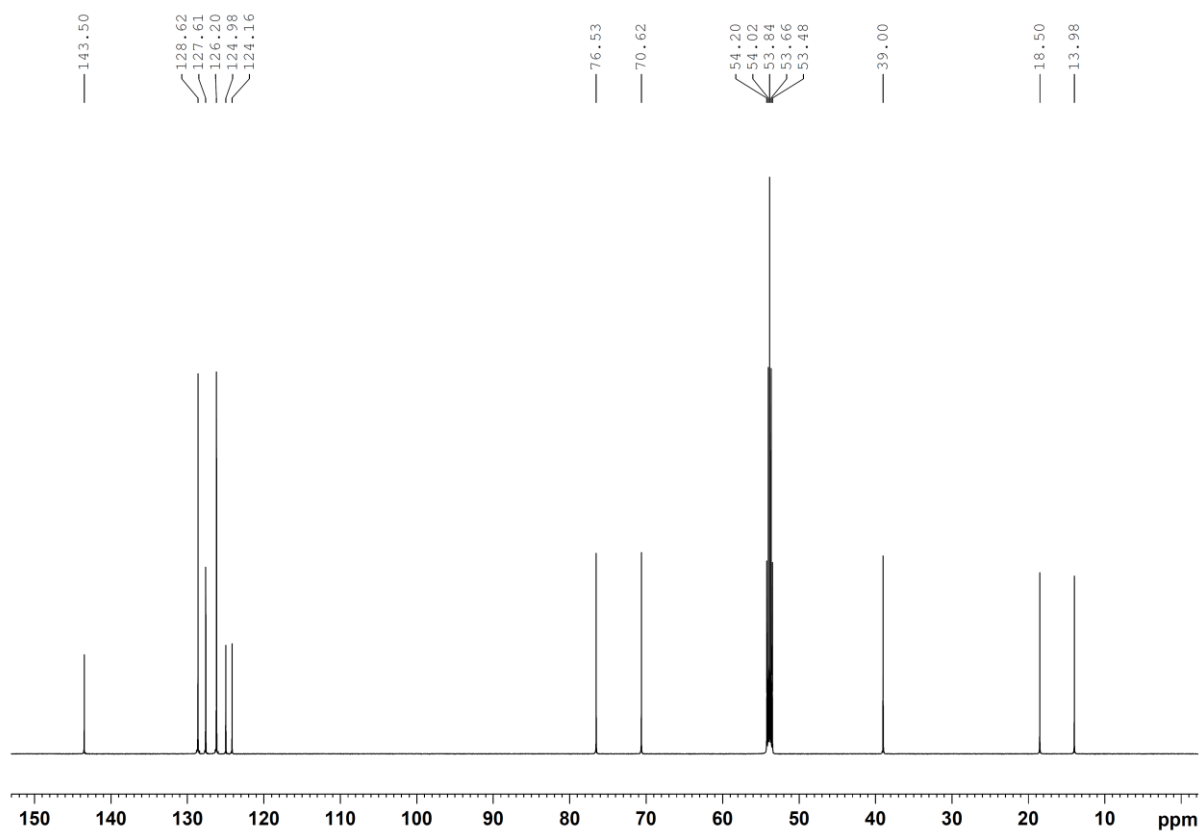

**<sup>1</sup>H NMR (3b)**

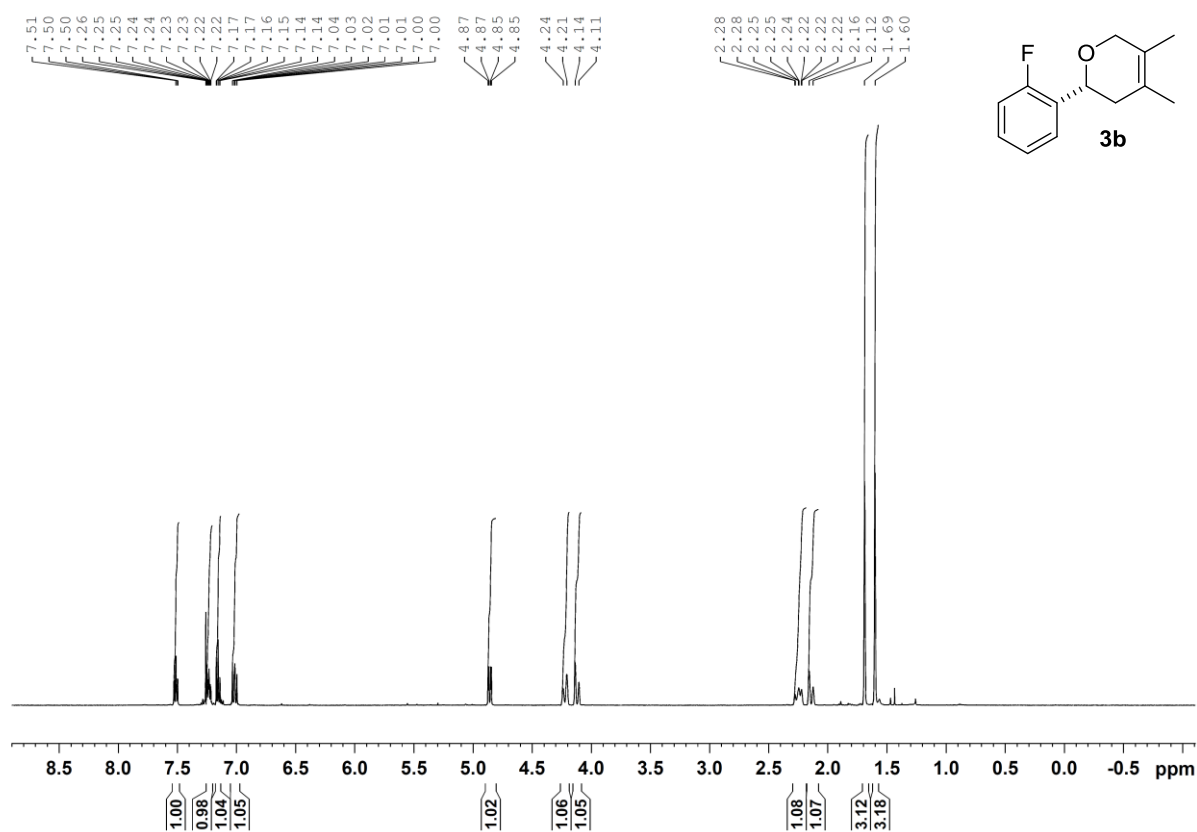

**<sup>13</sup>C NMR (3b)**

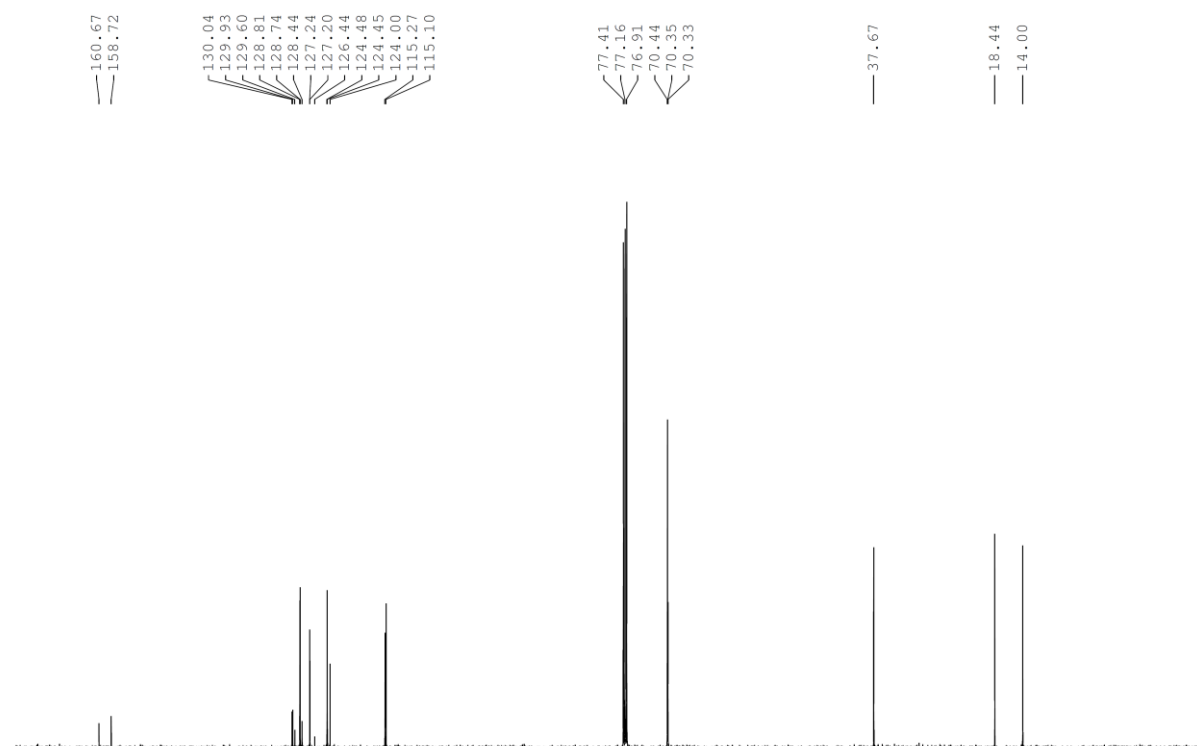



**<sup>1</sup>H NMR (3c)**

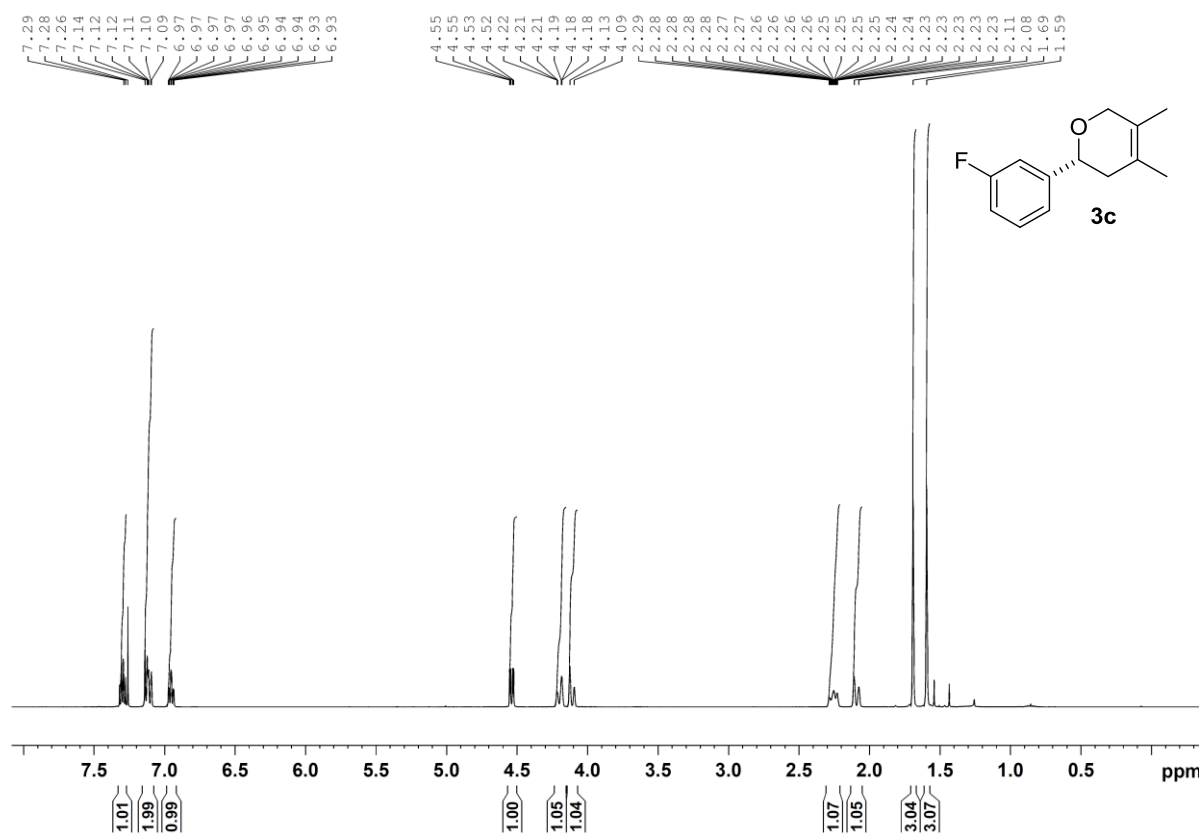

**<sup>13</sup>C NMR (3c)**

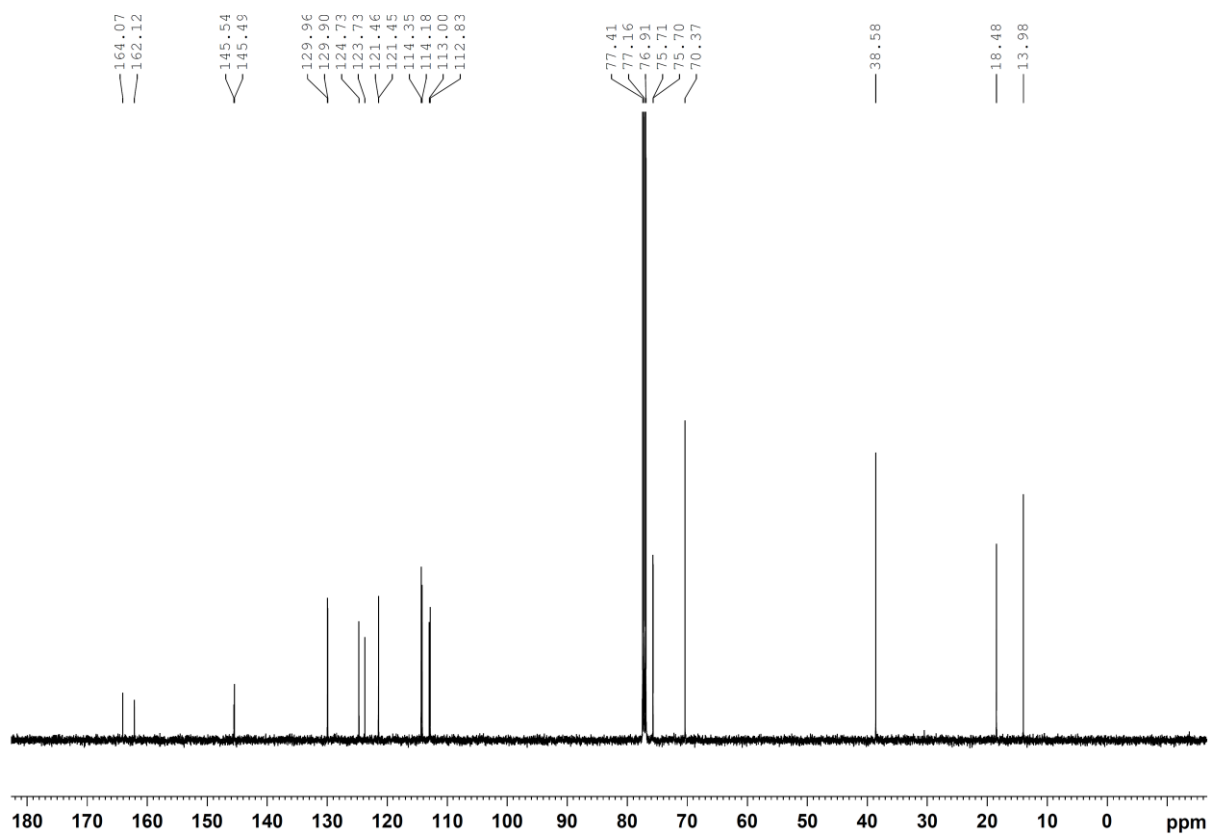

**<sup>1</sup>H NMR (3d)**

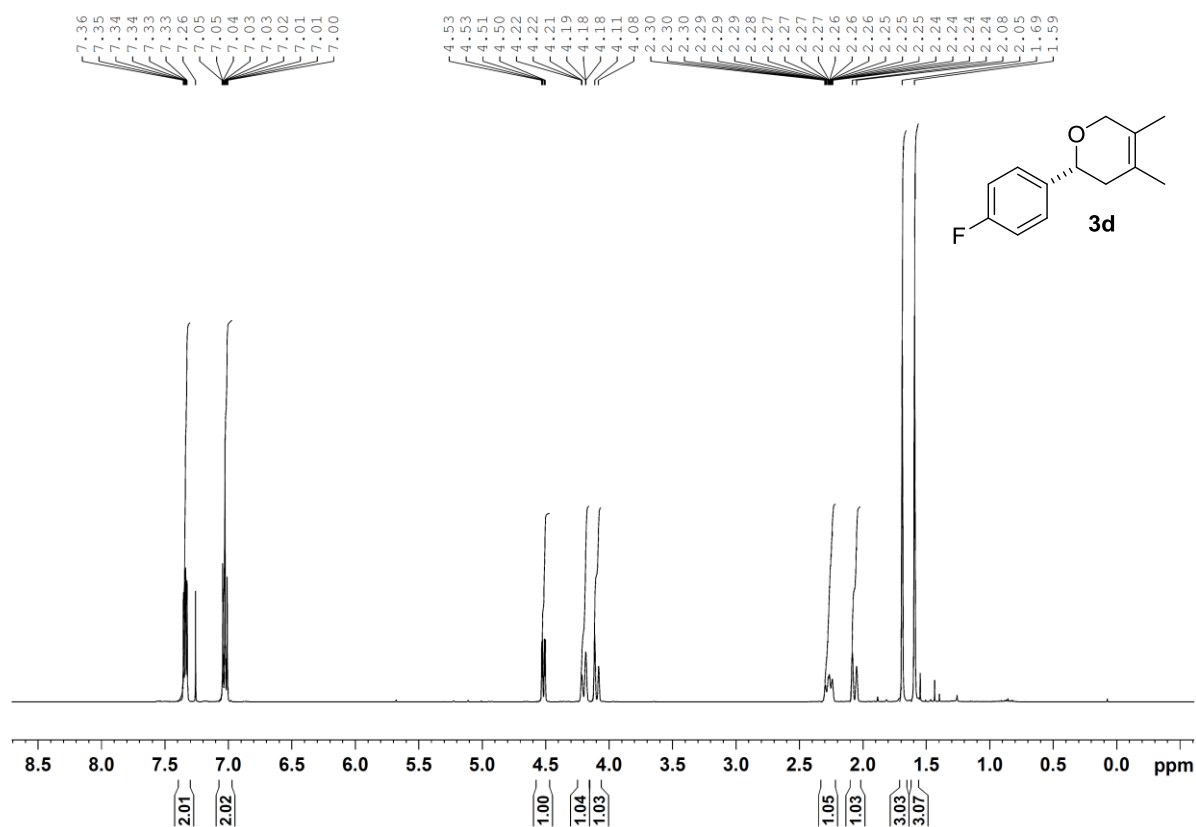

**<sup>13</sup>C NMR (3d)**

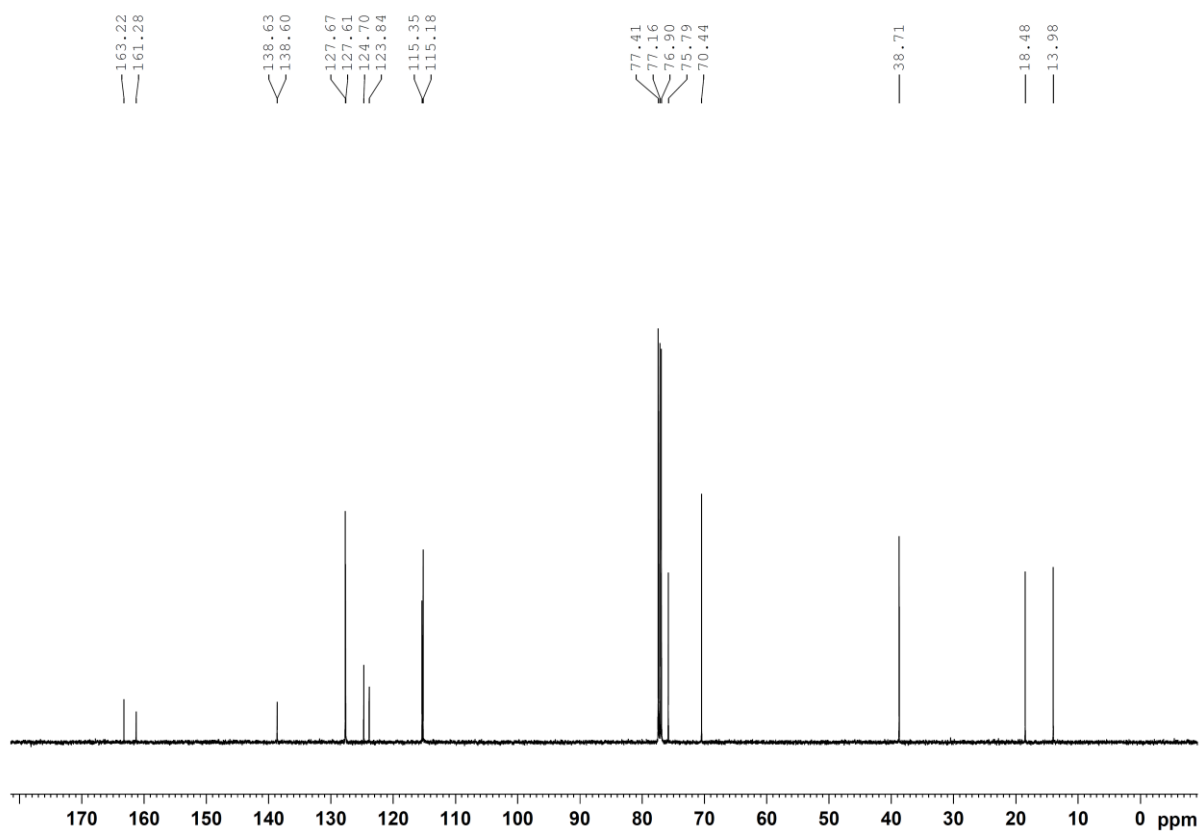

**<sup>1</sup>H NMR (3e)**

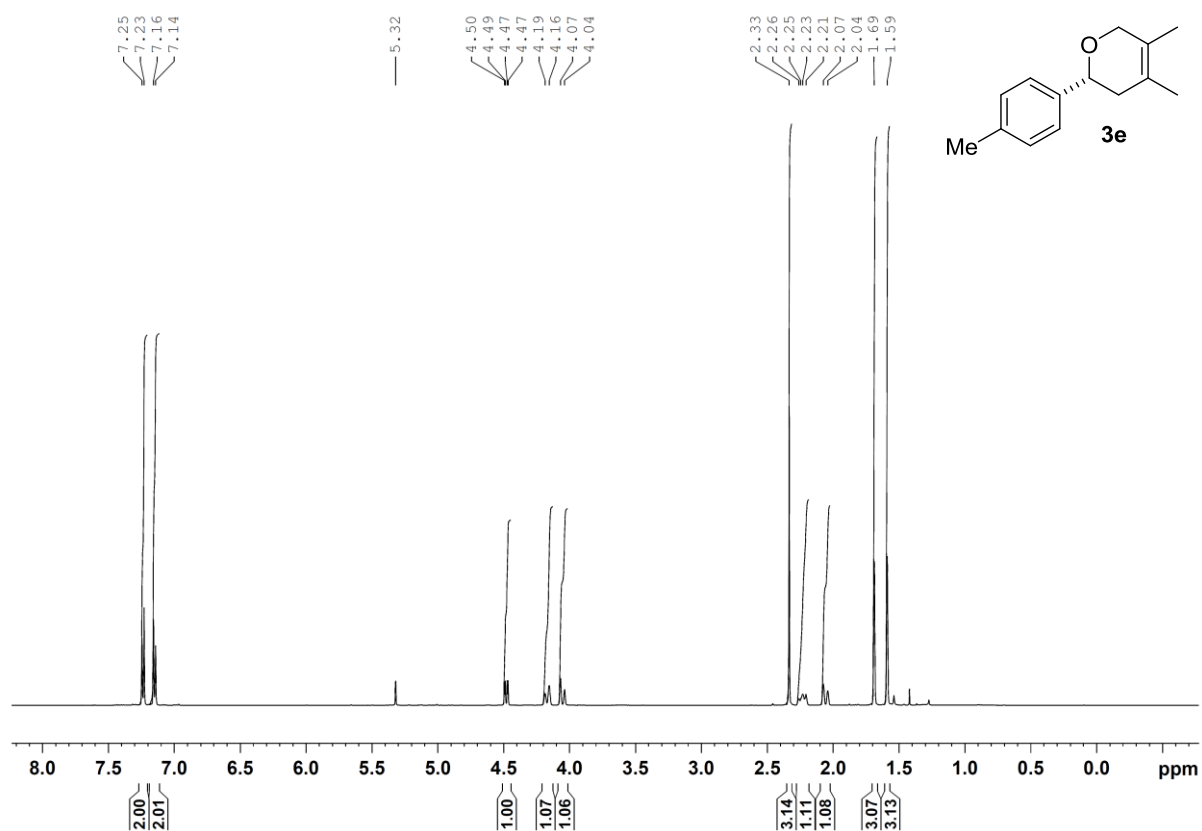

**<sup>13</sup>C NMR (3e)**

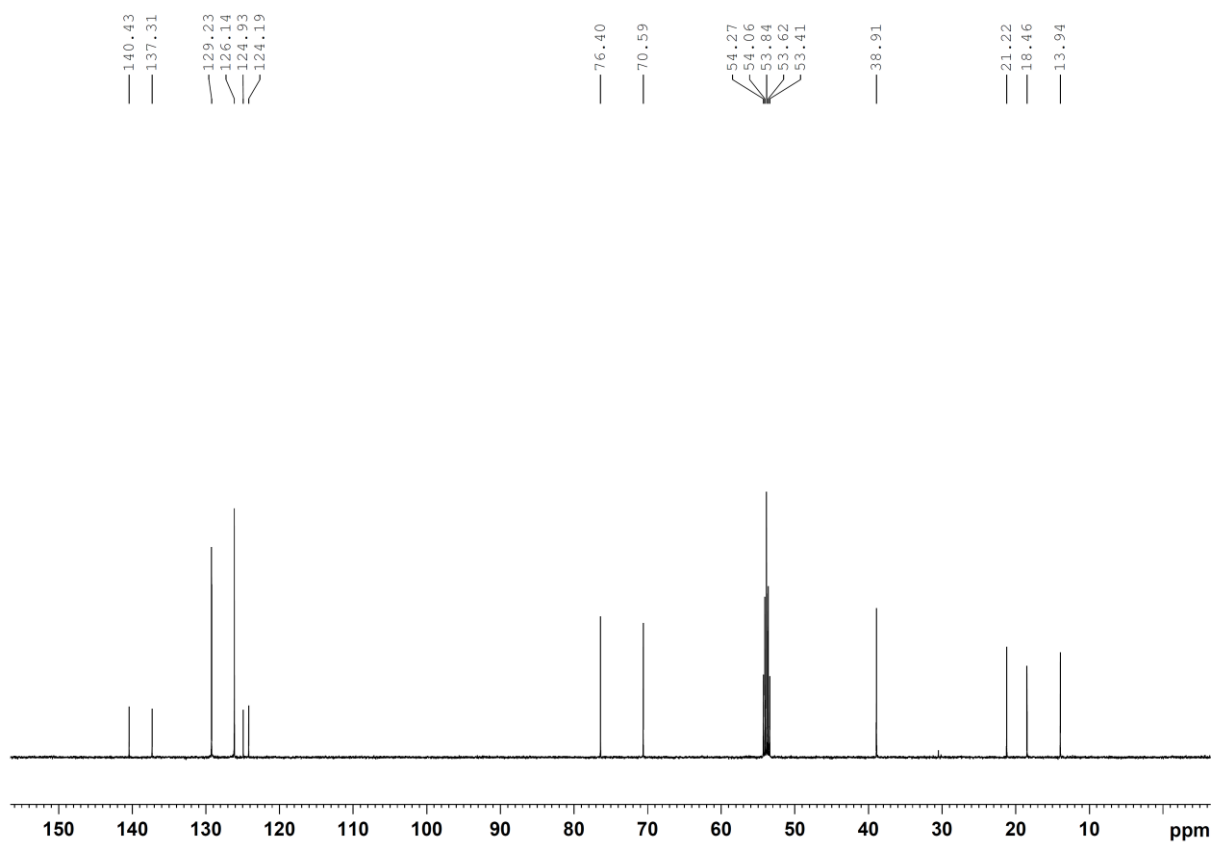

**<sup>1</sup>H NMR (3f)**

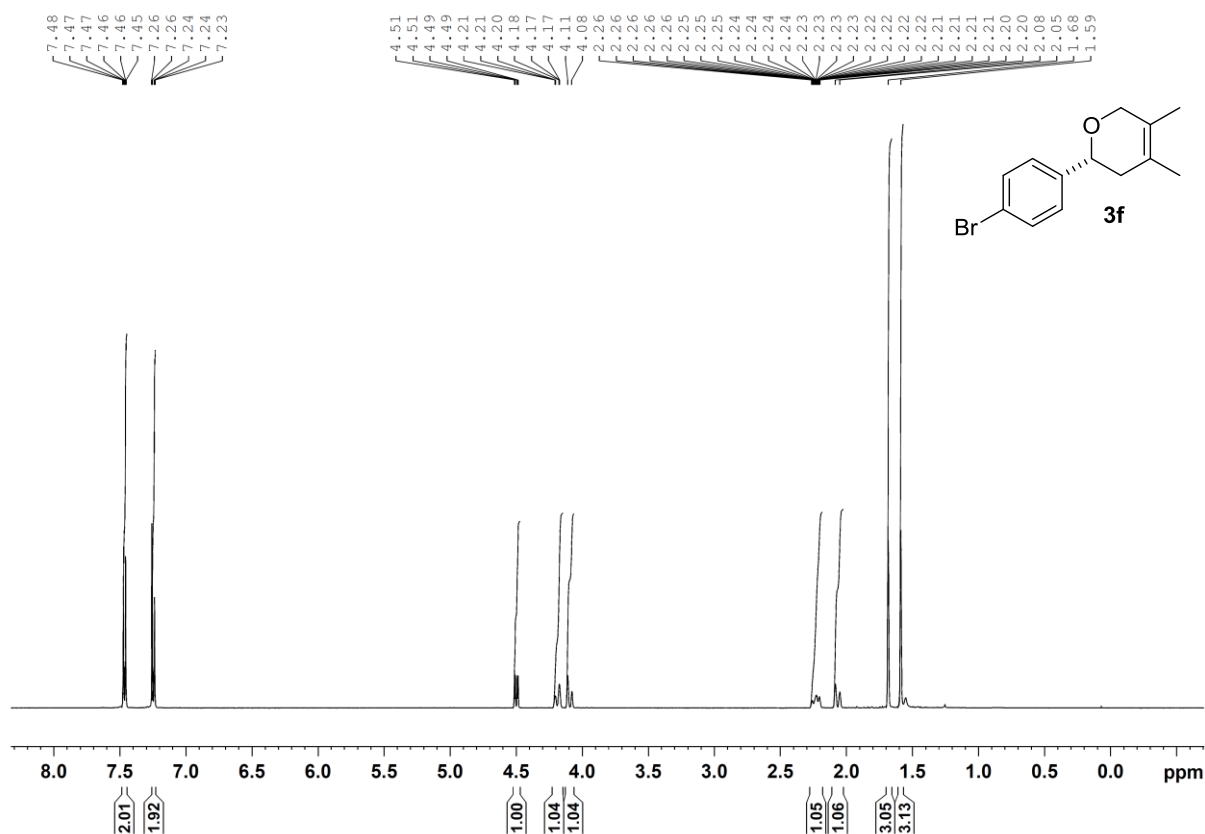

**<sup>13</sup>C NMR (3f)**

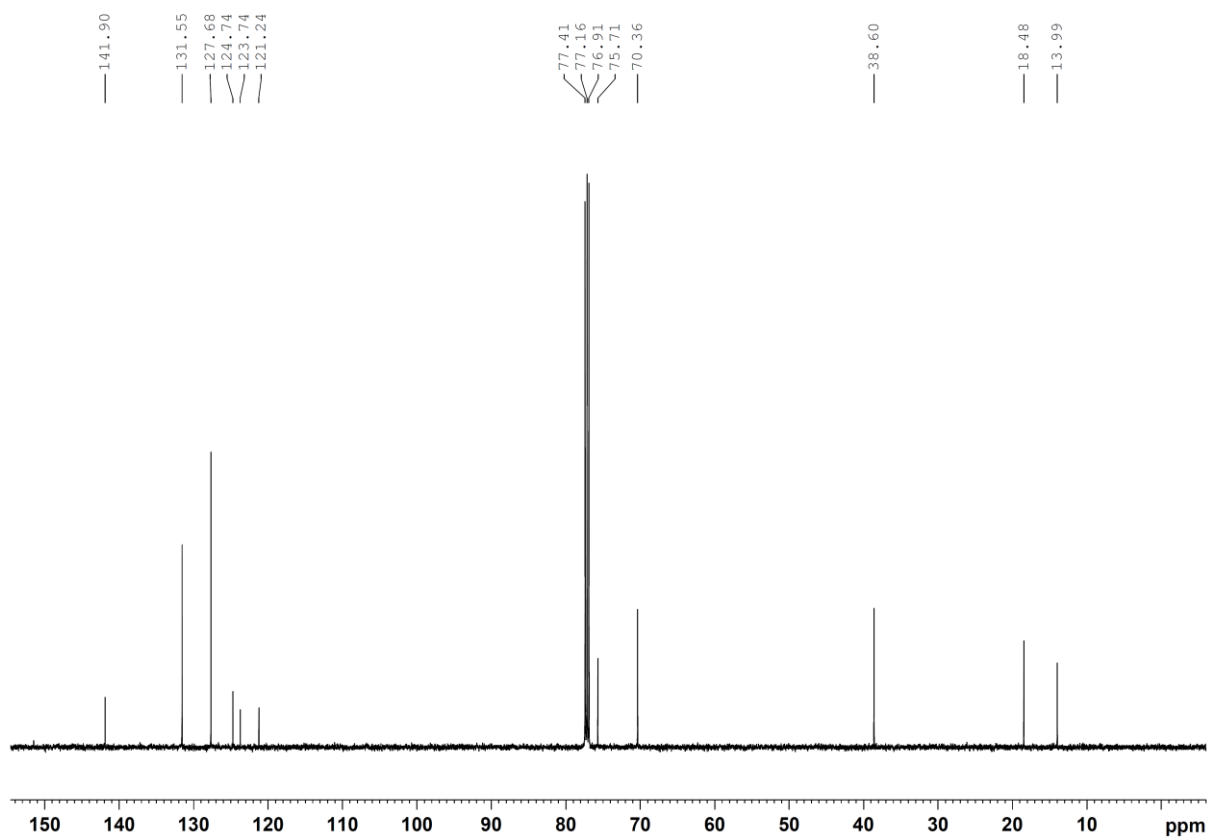

**<sup>1</sup>H NMR (3g)**

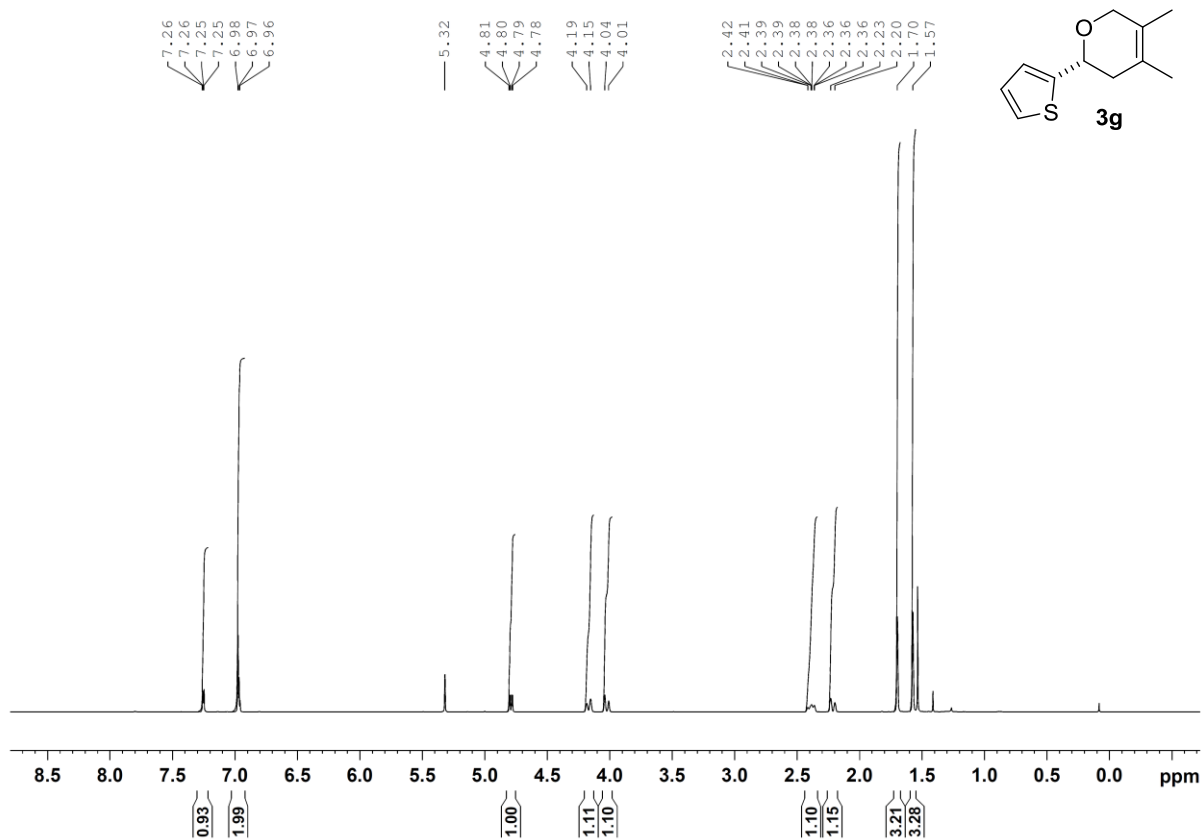

**<sup>13</sup>C NMR (3g)**

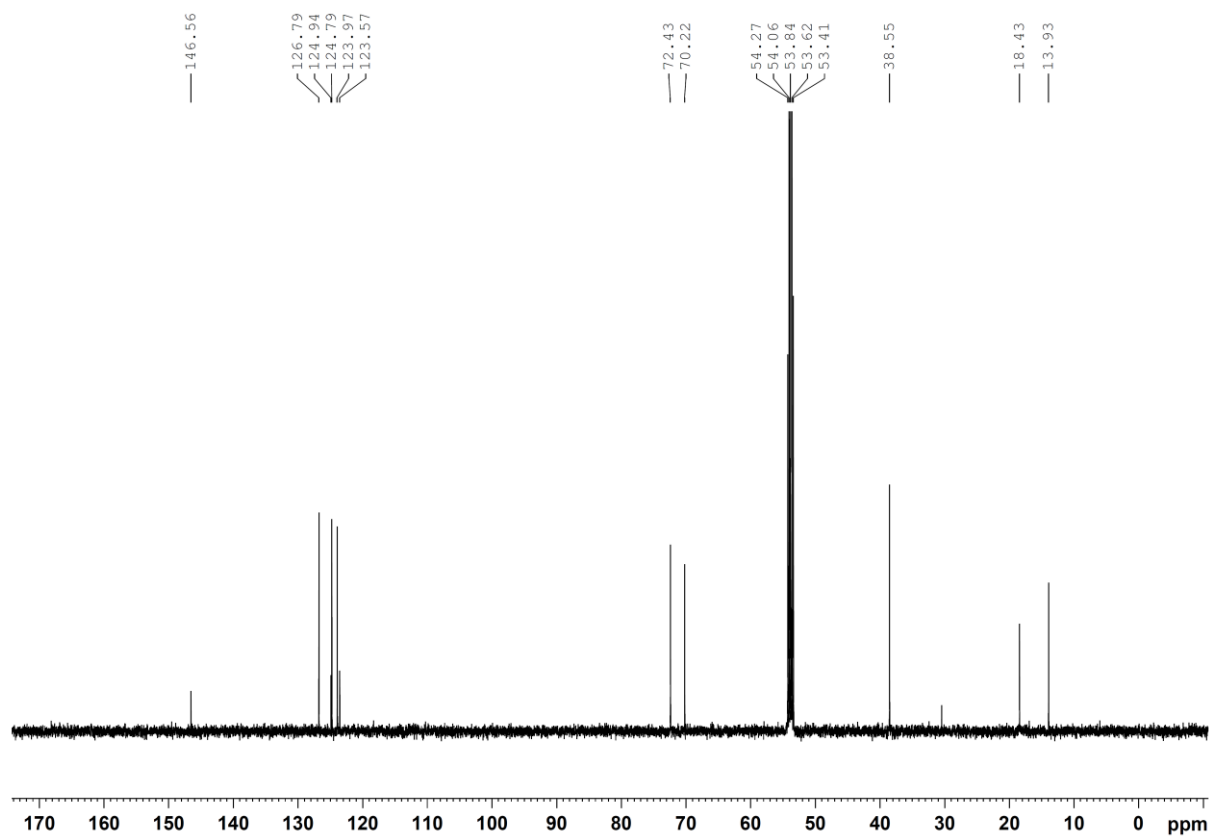

# <sup>1</sup>H NMR (3h)

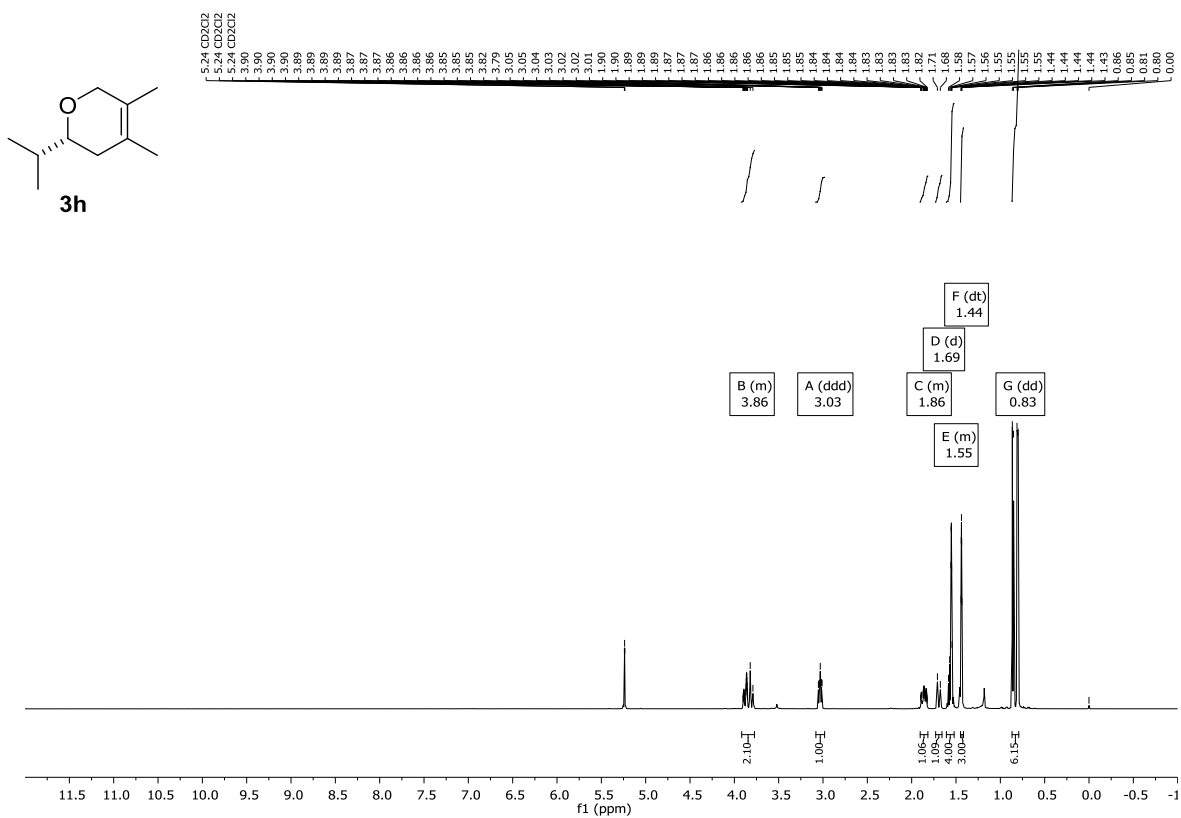

# <sup>13</sup>C NMR (3h)

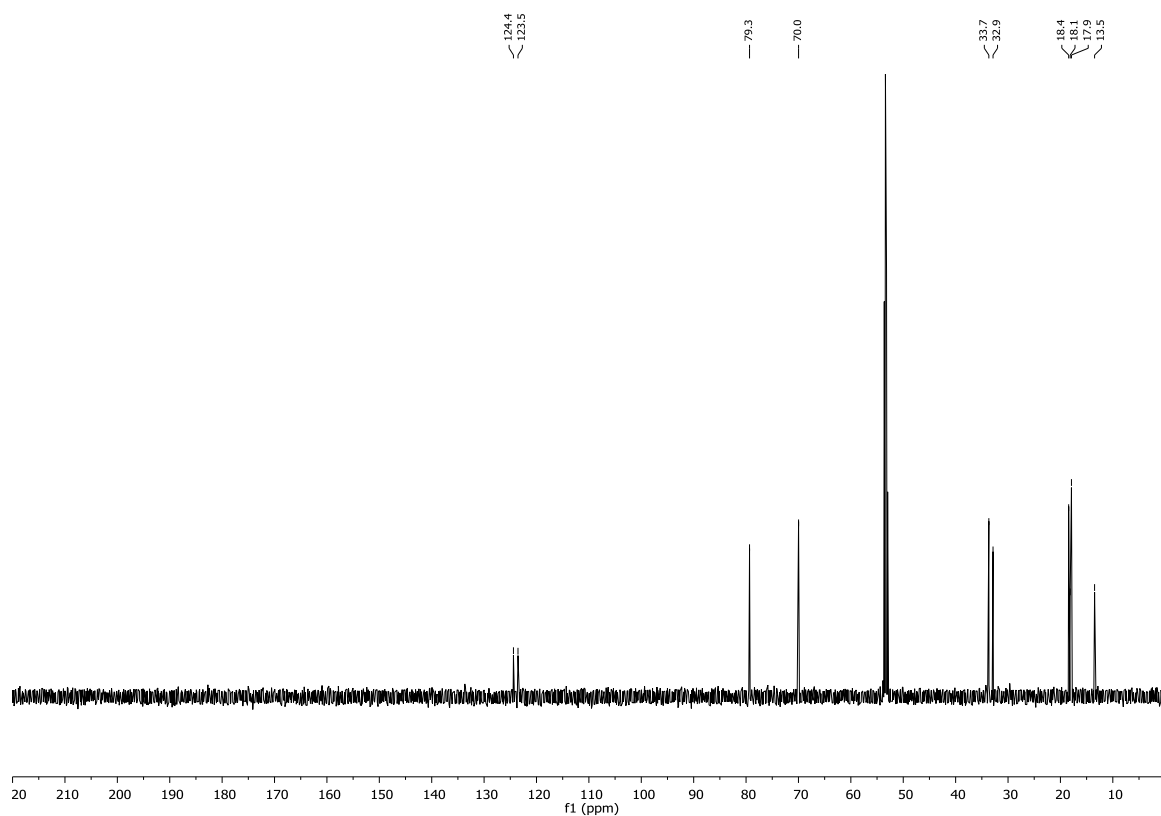

# <sup>1</sup>H NMR (3i)

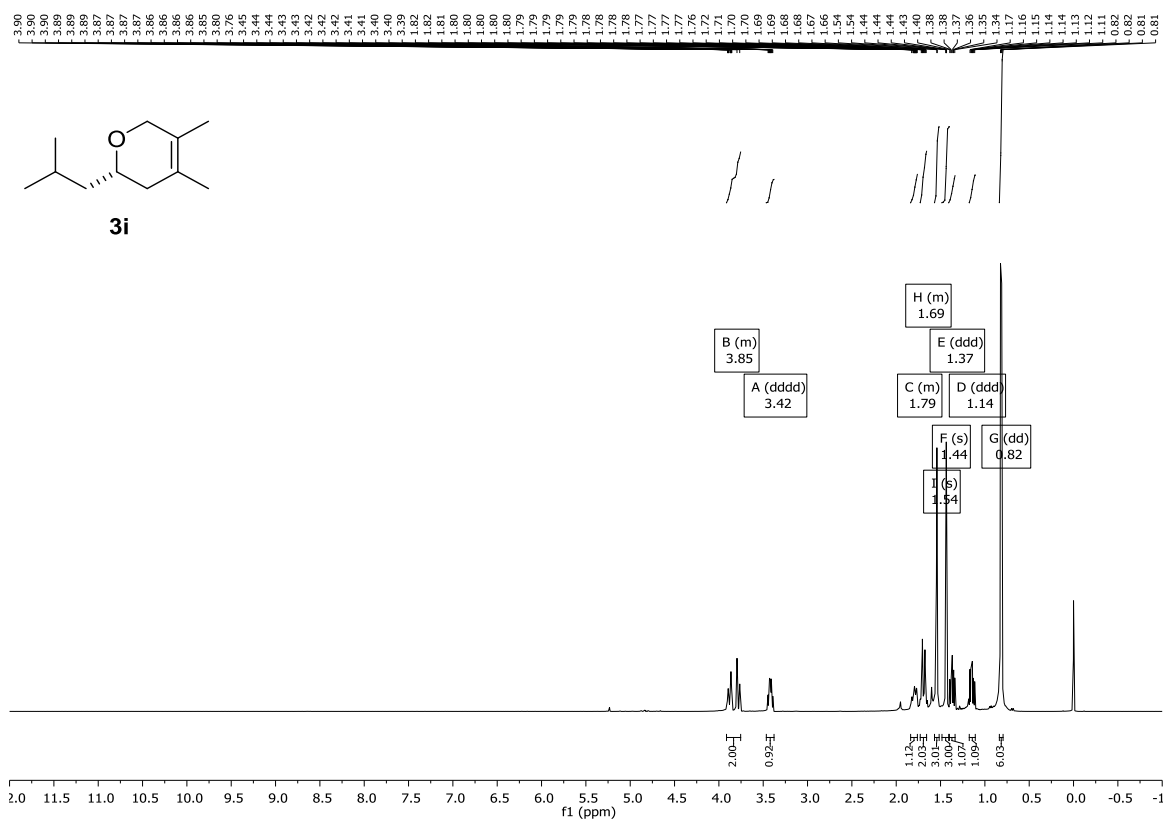

# <sup>13</sup>C NMR (3i)

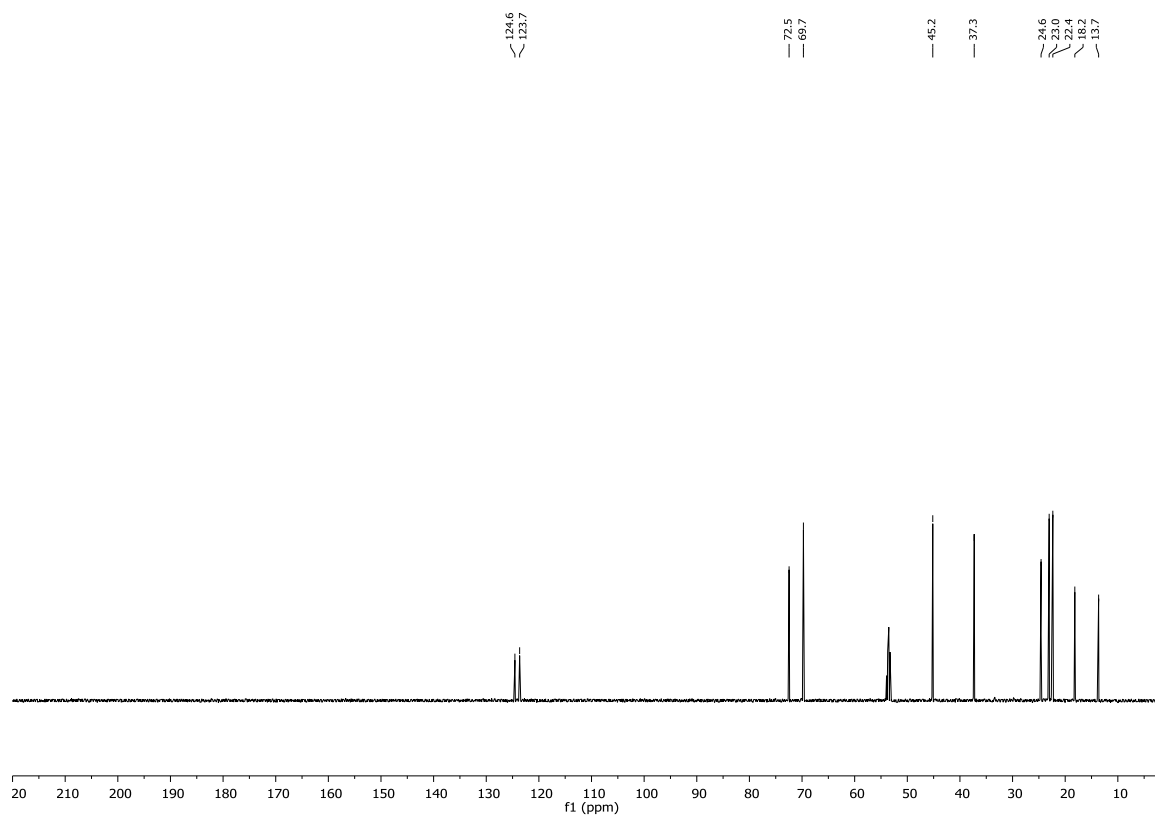

### <sup>1</sup>H NMR (3j)

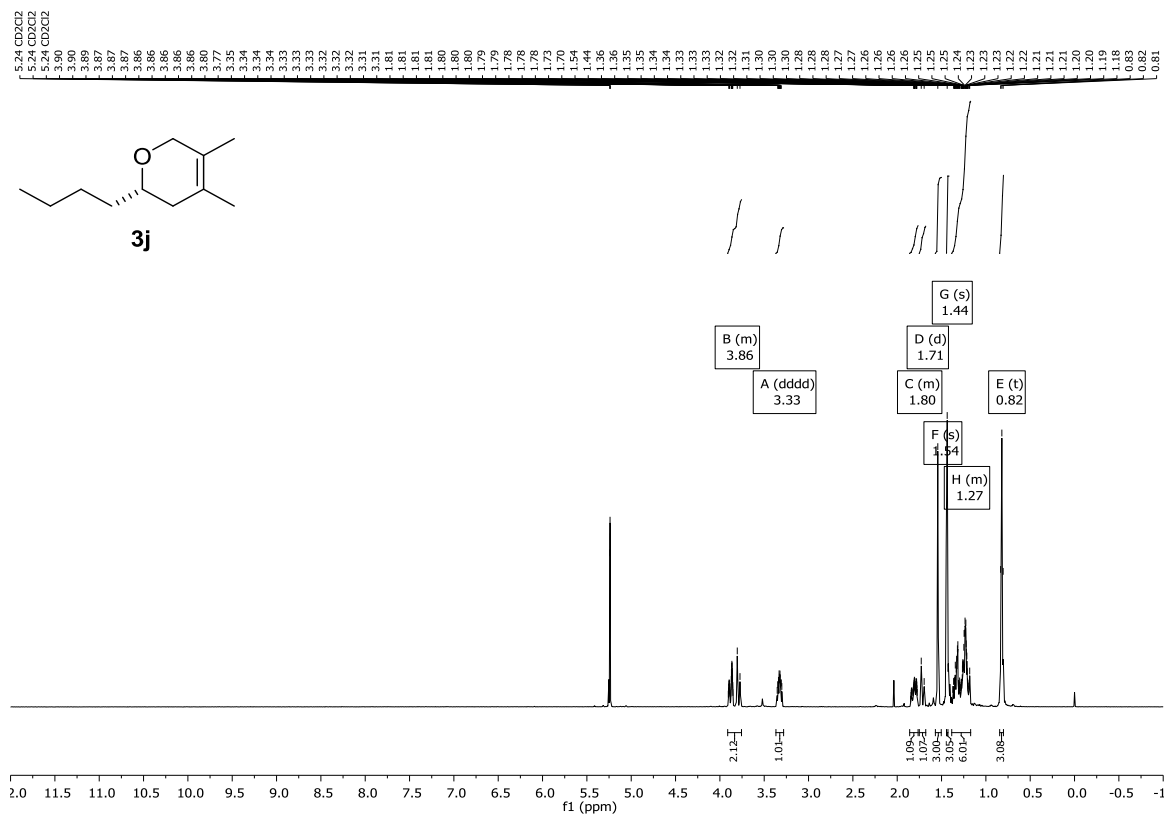 $^{13}\text{C}$  NMR (3j)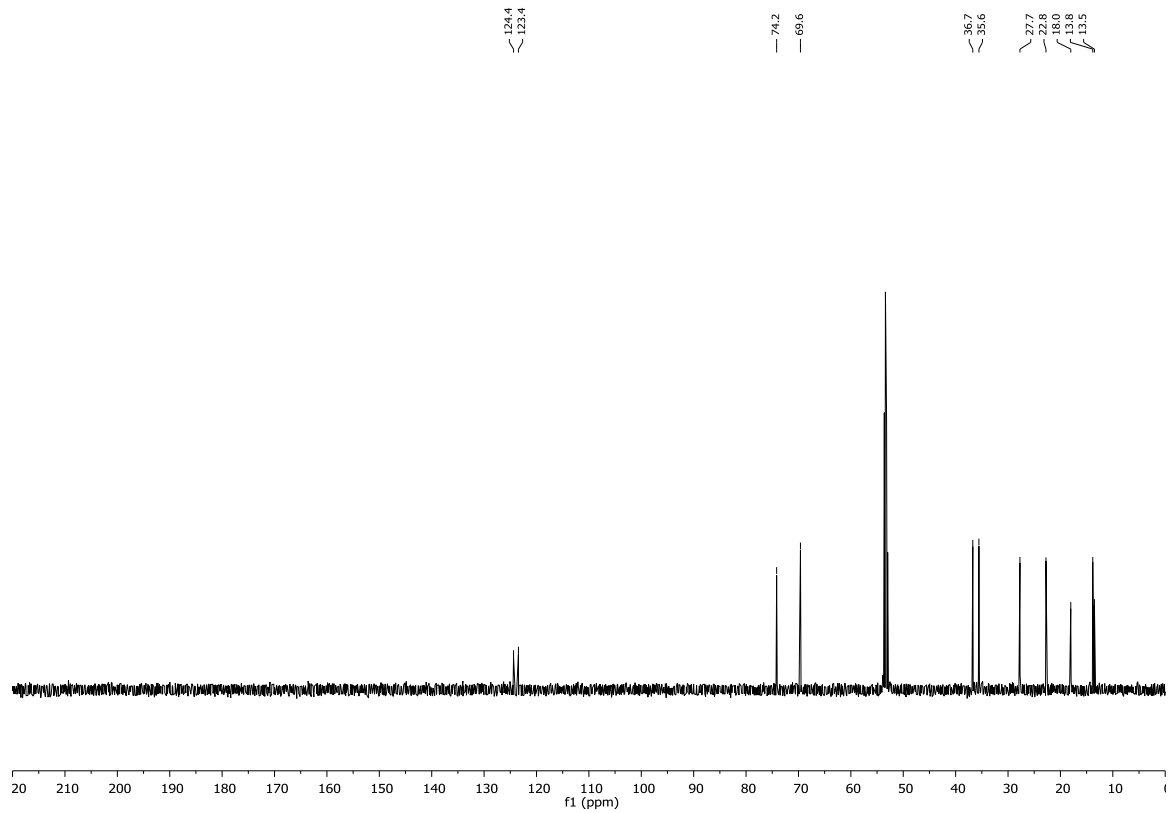



# <sup>1</sup>H NMR (3k)

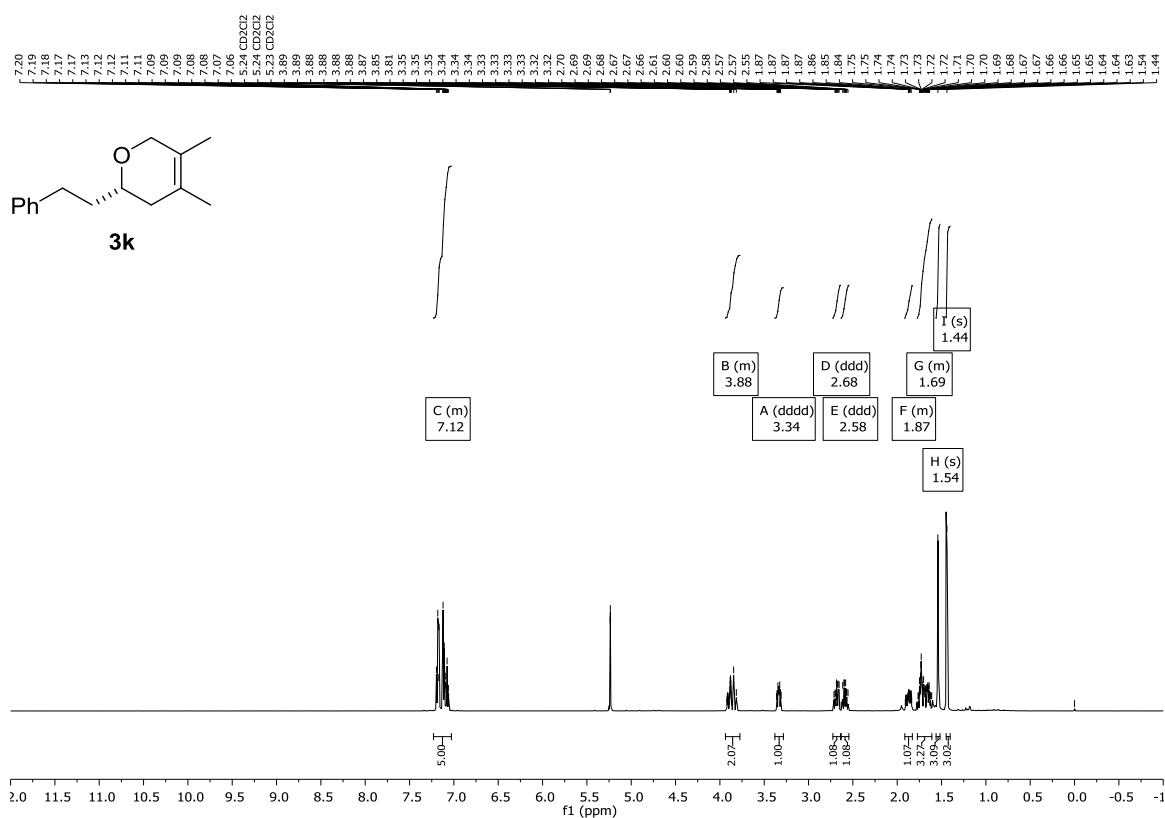

# <sup>13</sup>C NMR (3k)

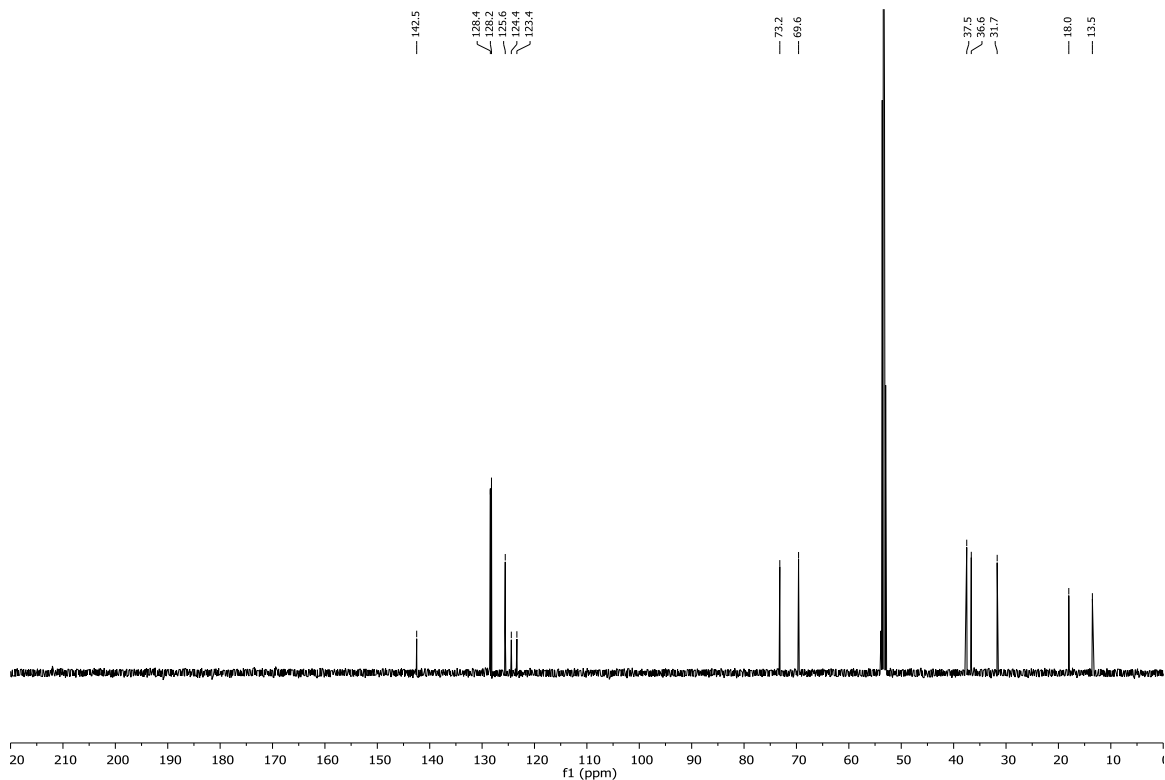

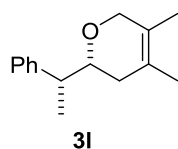

syn, 1R,6R

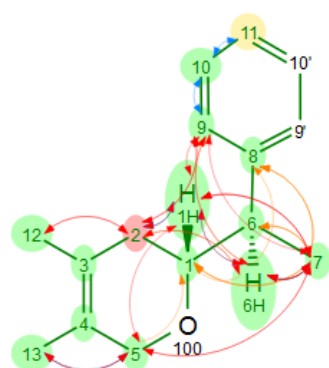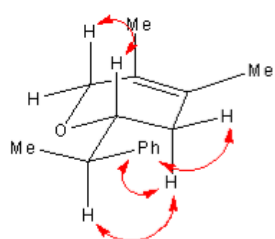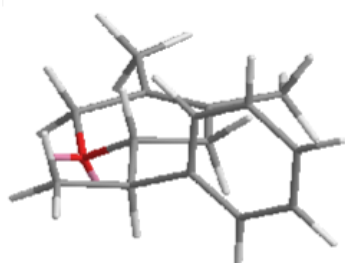

| Atom | Chemical Shift | Predicted Shift | Quality | J                              | COSY         | HSQC     | HMBC          | NOESY               |
|------|----------------|-----------------|---------|--------------------------------|--------------|----------|---------------|---------------------|
| 1 C  | 79.08          | 81.21           | 0.67    |                                |              | 1H       | 5ax, 6H, 7    |                     |
| 1H H | 3.51           | 3.95            | 0.67    | 10.50(2ax), 3.40(2eq), 8.10(?) | 6H, 2ax, 2eq | 1        |               | 5ax, 7, 2eq, 6H, 9  |
| 2 C  | 35.26          | 34.46           | 0.67    |                                |              | 2ax, 2eq | 6H            |                     |
| Hax  | 1.84           | 1.94, 2.17      | -0.39   | -17.50(2eq), 10.50(1H)         | 1H           | 2        |               | 6H, 2eq, 12, 9      |
| Heq  | 1.45           | 1.94, 2.17      | -0.02   | -17.50(2ax), 3.40(1H)          | 1H           | 2        |               | 1H, 2ax, 12, 9      |
| 3 C  | 124.6          | 121.15          | 0.67    |                                |              |          |               |                     |
| 4 C  | 123.95         | 123.76          | 0.67    |                                |              |          |               |                     |
| 5 C  | 70.37          | 69.15           | 0.67    |                                |              | 5ax, 5eq |               |                     |
| Hax  | 3.95           | 3.99, 4.08      | 0.56    | -15.40(5eq)                    | 13           | 5        | 1             | 13, 7, 1H           |
| Heq  | 4.02           | 3.99, 4.08      | 0.67    | -15.40(5ax)                    | 13           | 5        |               | 13, 7               |
| 6 C  | 45.76          | 39.93           | 0.67    |                                |              | 6H       | 7             |                     |
| 6H H | 2.72           | 2.93            | 0.67    | 7.00(7), 8.10(?)               | 7, 1H        | 6        | 8, 9, 1, 2, 7 | 1H, 7, 2ax, 9       |
| 7 C  | 18.52          | 16.47           | 0.67    |                                |              | 7        | 6H            |                     |
| H3   | 1.33           | 1.34            | 0.67    | 7.00(6H)                       | 6H           | 7        | 8, 1, 6       | 5ax, 5eq, 1H, 6H, 9 |
| 8 C  | 144.99         | 144.51          | 0.67    |                                |              |          | 6H, 7         |                     |
| 9 C  | 128.31         | 126.53          | 0.67    |                                |              | 9        | 6H            |                     |
| H    | 7.2            | 7.25            | 0.67    |                                | 10           | 9        |               | 7, 1H, 6H, 2ax, 2eq |
| 10 C | 128.62         | 128.56          | 0.67    |                                |              | 10       |               |                     |
| H    | 7.28           | 7.28            | 0.63    |                                | 9, 11        | 10       |               |                     |
| 11 C | 126.59         | 126.47          | 0.67    |                                |              | 11       |               |                     |
| H    | 7.2            | 7.22            | 0.15    |                                | 10           | 11       |               |                     |
| 12 C | 18.41          | 19.13           | 0.67    |                                |              |          |               |                     |
| H3   | 1.52           | 1.71            | 0.67    |                                |              |          |               | 2ax, 2eq            |
| 13 C | 13.86          | 16.25           | 0.67    |                                |              |          |               |                     |
| H3   | 1.52           | 1.76            | 0.67    |                                | 5ax, 5eq     |          |               | 5ax, 5eq            |

**<sup>1</sup>H NMR (31)**

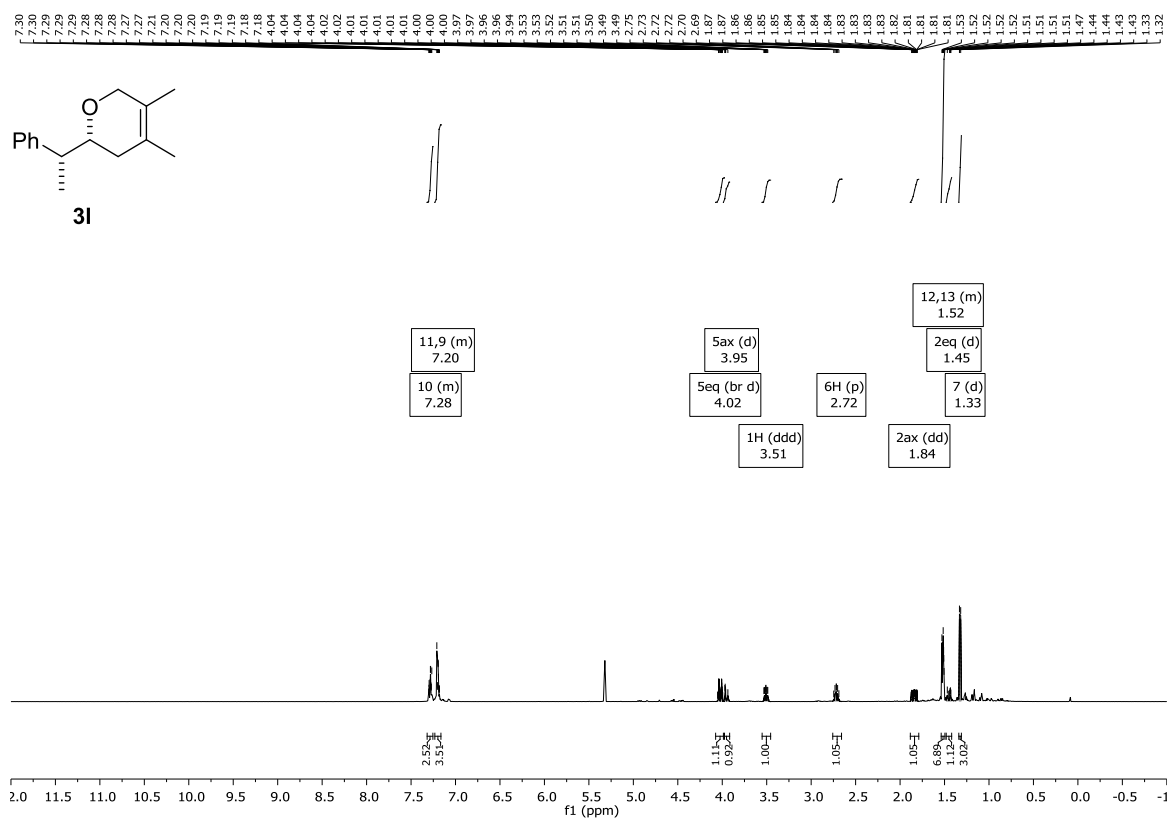 $^{13}\text{C}$  NMR (31)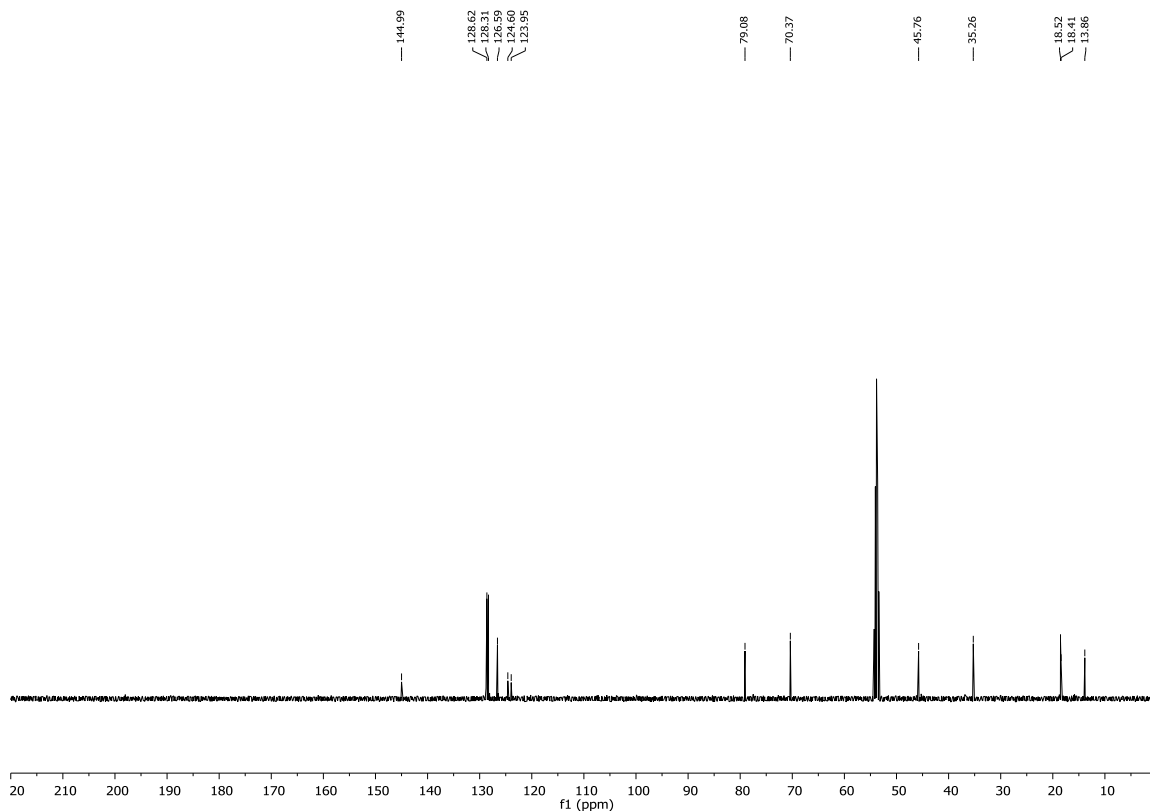

# HSQC (3I)

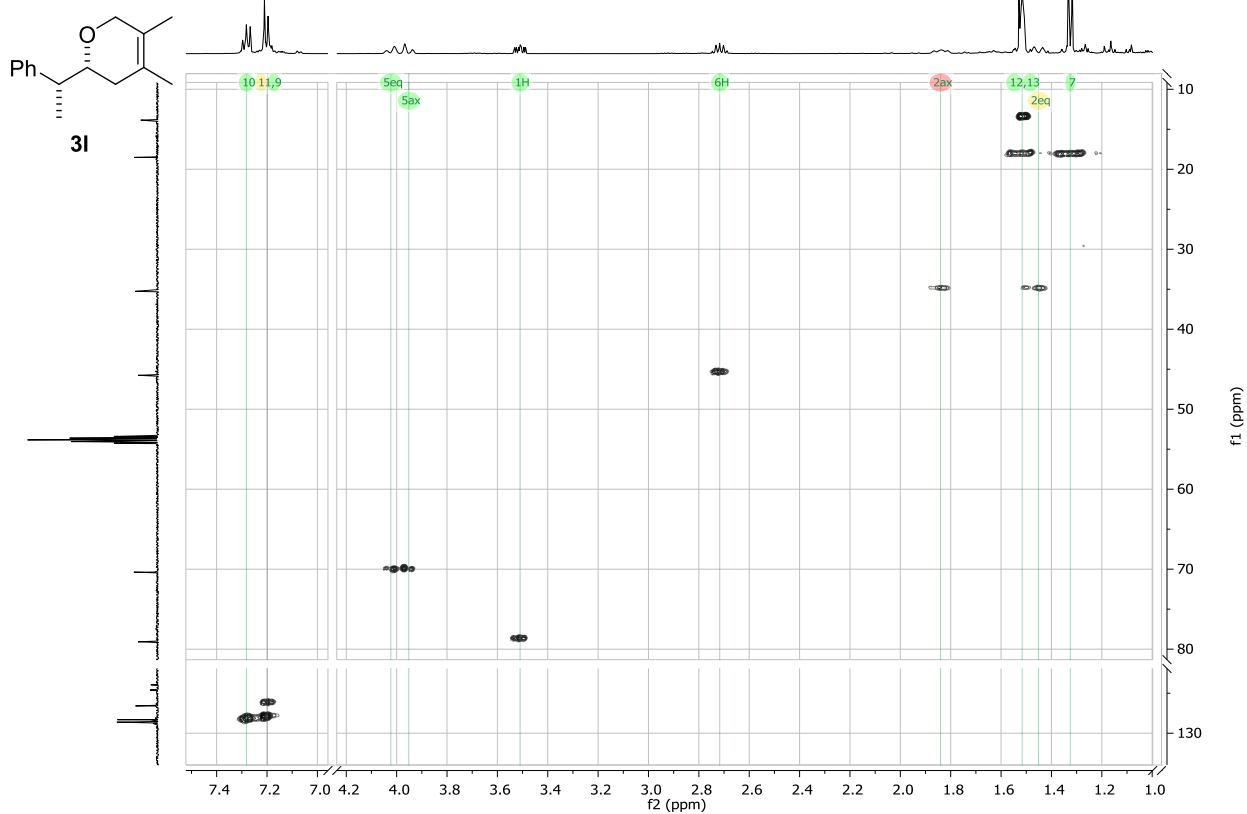

# NOESY (3I)

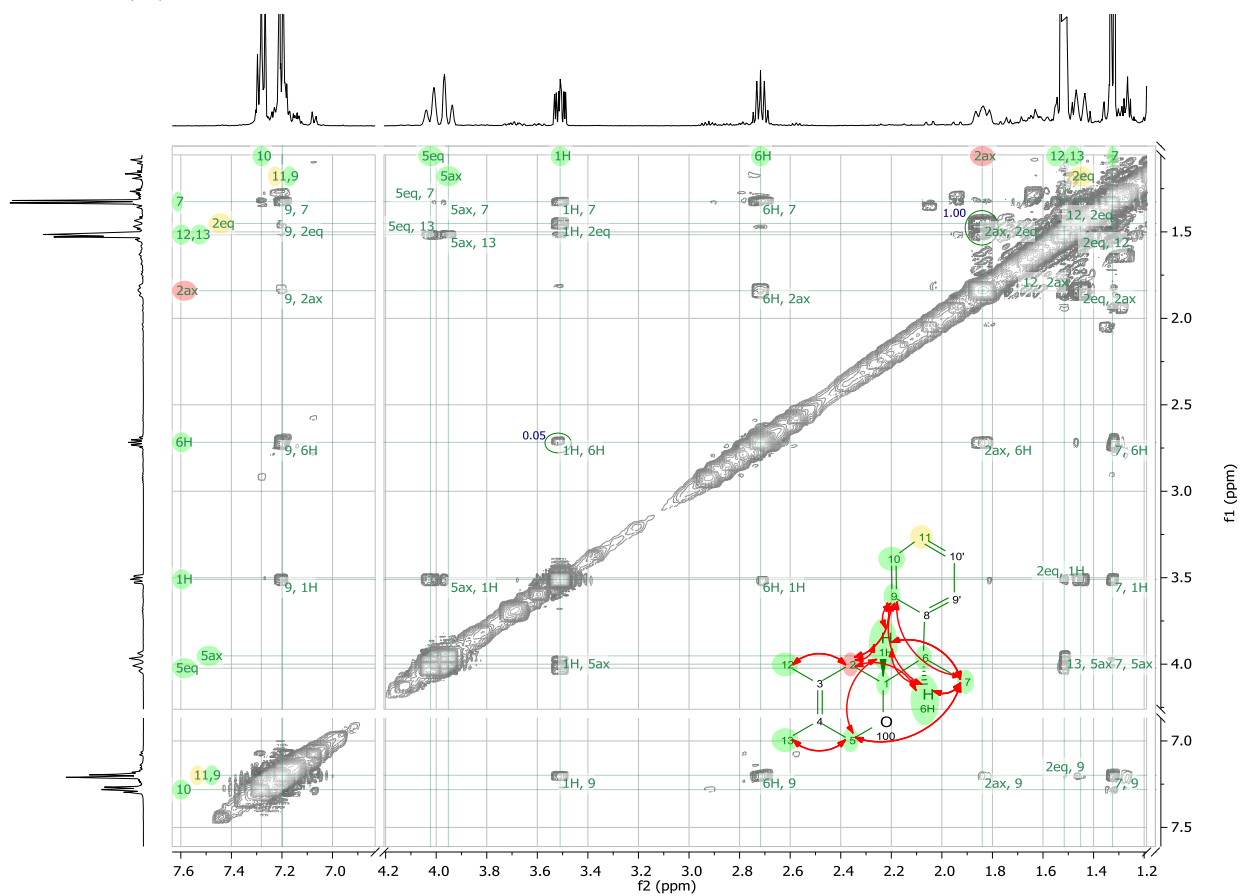

# COSY (3l)

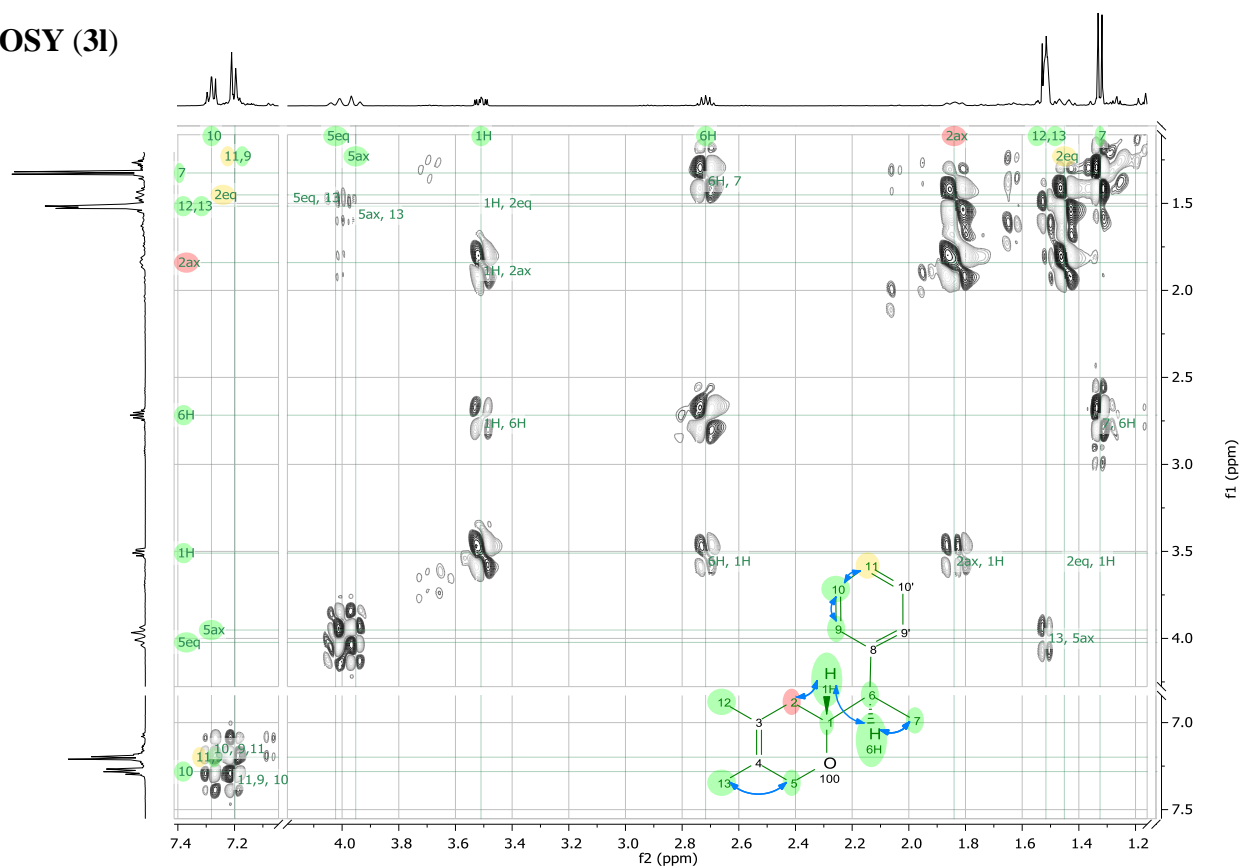

# HMBC (3l)

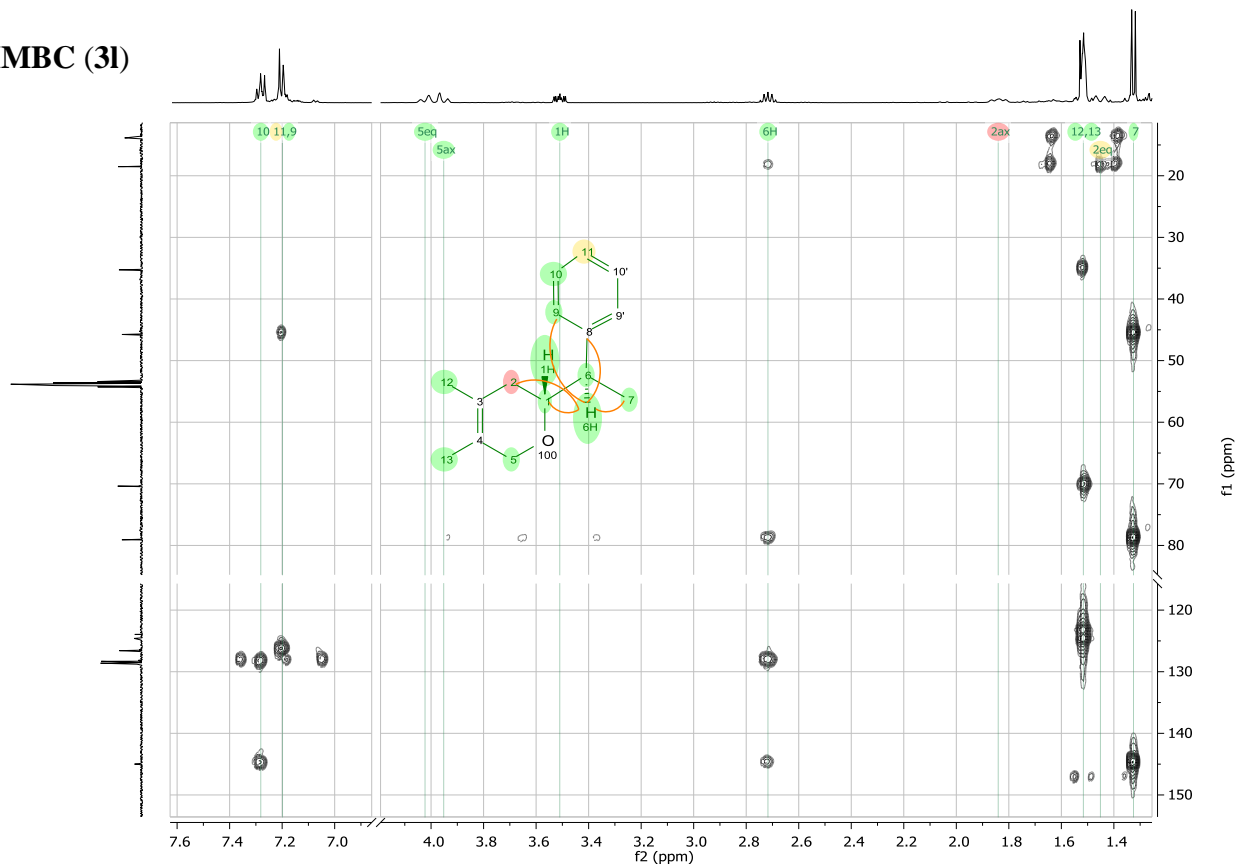

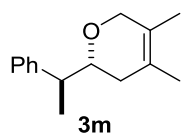

anti, 1R,6S

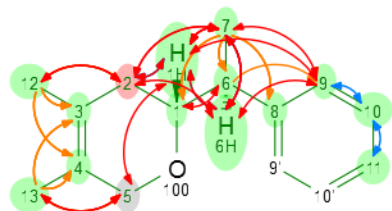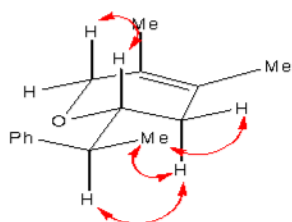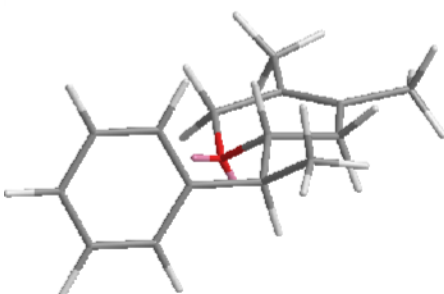

| Atom | Chemical Shift | Predicted Shift | Quality | J                               | COSY         | HSQC     | HMBC    | NOESY               |
|------|----------------|-----------------|---------|---------------------------------|--------------|----------|---------|---------------------|
| 1 C  | 78.58          | 81.21           | 0.67    |                                 |              | 1H       | 7       |                     |
| 1H H | 3.61           | 3.93            | 0.67    | 10.60(2ax), 3.40(2eq), 7.30(6H) | 2eq, 2ax, 6H | 1        |         | 2eq, 9, 6H, 5ax, 7  |
| 2 C  | 34.66          | 34.46           | 0.67    |                                 |              | 2ax, 2eq | 12      |                     |
| Hax  | 1.97           | 1.94, 2.16      | -0.43   | -16.80(2eq), 10.60(1H)          | 1H, 2eq      | 2        |         | 12, 6H, 7           |
| Heq  | 1.84           | 1.94, 2.16      | -0.32   | -16.80(2ax), 3.40(1H)           | 1H, 2ax      | 2        |         | 12, 1H, 7           |
| 3 C  | 124.77         | 121.15          | 0.67    |                                 |              |          | 13, 12  |                     |
| 4 C  | 123.76         | 123.76          | 0.67    |                                 |              |          | 13, 12  |                     |
| 5 C  | 70.38          | 69.15           | 0.67    |                                 |              | 5ax, 5eq | 13      |                     |
| Hax  | 3.89           | 3.99, 4.08      | -1      | -15.40(5eq)                     | 5eq          | 5        |         | 13, 1H              |
| Heq  | 3.82           | 3.99, 4.08      | 0.31    | -15.40(5ax)                     | 5ax          | 5        |         | 13                  |
| 6 C  | 45.33          | 39.93           | 0.67    |                                 |              | 6H       | 7       |                     |
| 6H H | 2.8            | 2.94            | 0.67    | 7.20(7), 7.30(1H)               | 1H, 7        | 6        |         | 9, 2ax, 1H, 7       |
| 7 C  | 18.53          | 16.47           | 0.67    |                                 |              | 7        |         |                     |
| H3   | 1.24           | 1.34            | 0.67    | 7.20(6HH)                       | 6H           | 7        | 6, 1, 8 | 2eq, 9, 2ax, 1H, 6H |
| 8 C  | 145.41         | 144.51          | 0.67    |                                 |              |          | 7       |                     |
| 9 C  | 128.35         | 126.53          | 0.67    |                                 |              | 9        | 6'      |                     |
| H    | 7.23           | 7.24            | 0.67    |                                 | 10           | 9        |         | 6H, 1H, 7           |
| 10 C | 128.42         | 128.56          | 0.67    |                                 |              | 10       |         |                     |
| H    | 7.27           | 7.28            | 0.67    |                                 | 9, 11        | 10       |         |                     |
| 11 C | 126.38         | 126.47          | 0.67    |                                 |              | 11       |         |                     |
| H    | 7.18           | 7.22            | 0.62    |                                 | 10           | 11       |         |                     |
| 12 C | 18.03          | 19.13           | 0.67    |                                 |              | 12       |         |                     |
| H3   | 1.62           | 1.71            | 0.67    |                                 |              | 12       | 2, 3, 4 | 2eq, 2ax            |
| 13 C | 13.87          | 16.25           | 0.67    |                                 |              | 13       |         |                     |
| H3   | 1.5            | 1.76            | 0.67    |                                 |              | 13       | 3, 4, 5 | 5ax, 5eq            |

# <sup>1</sup>H NMR (3m)

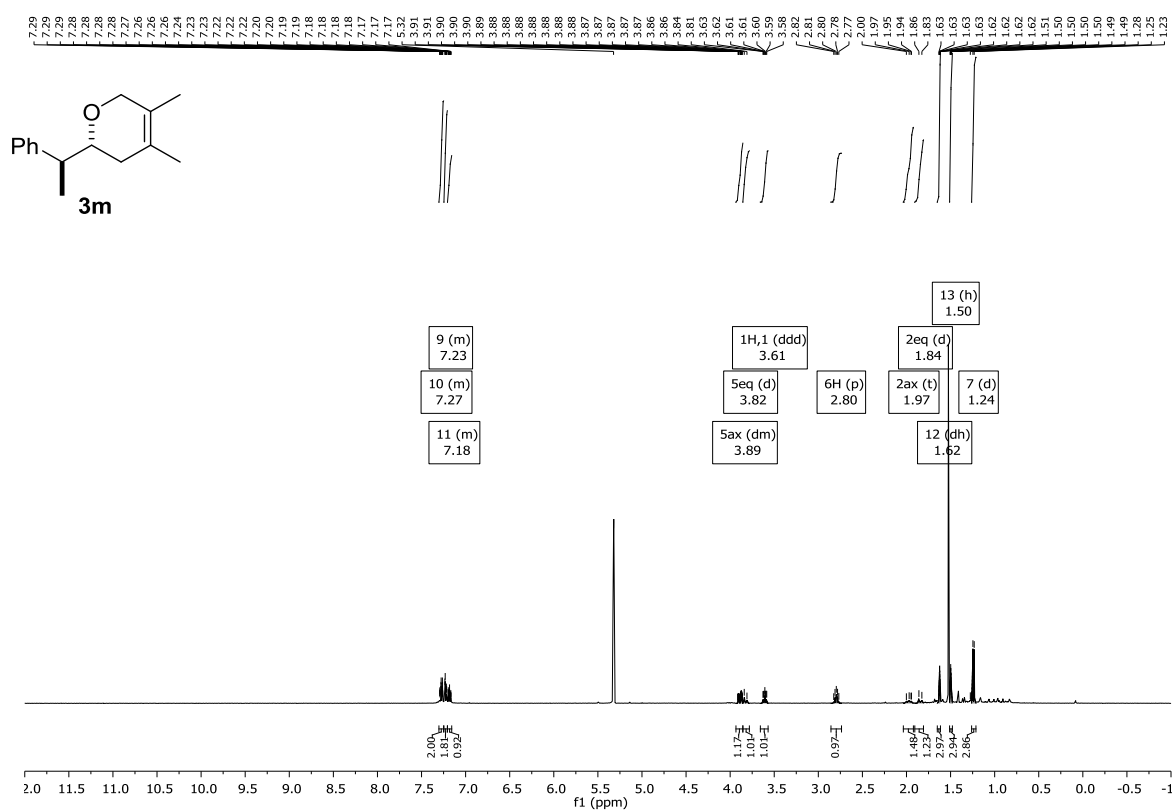

# <sup>13</sup>C NMR (3m)

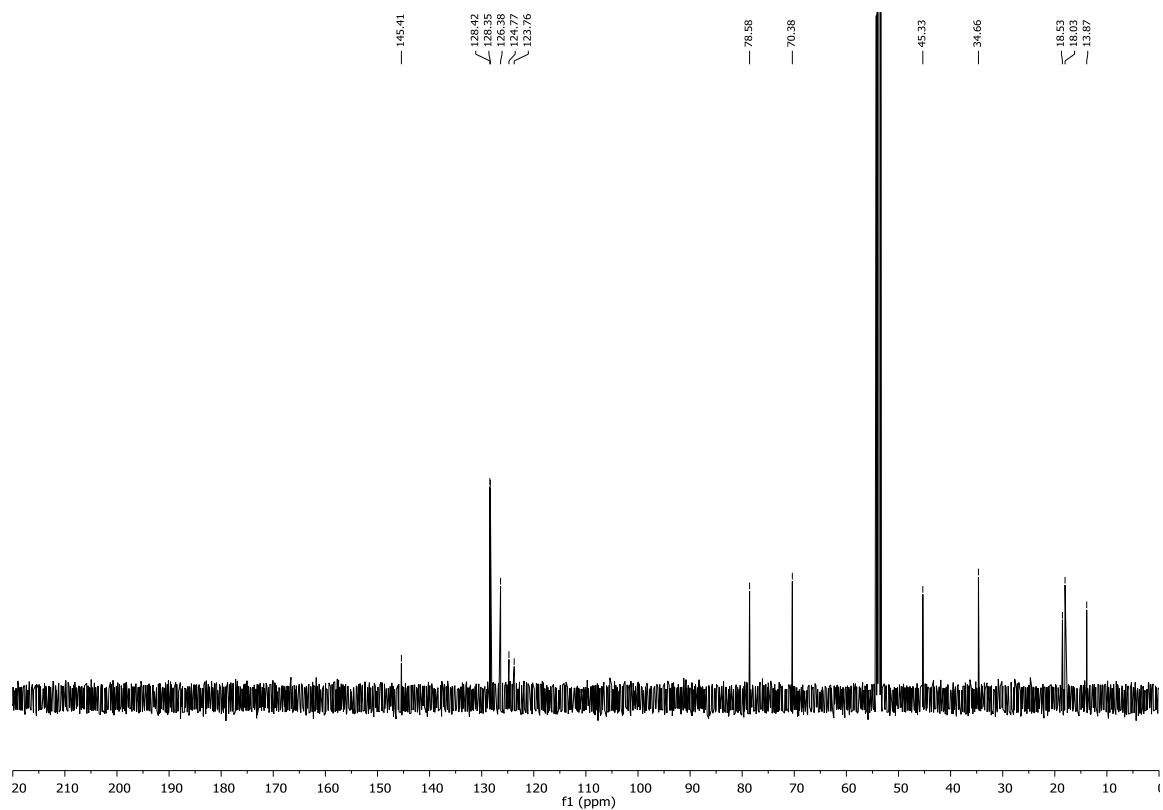

# NOESY (3m)

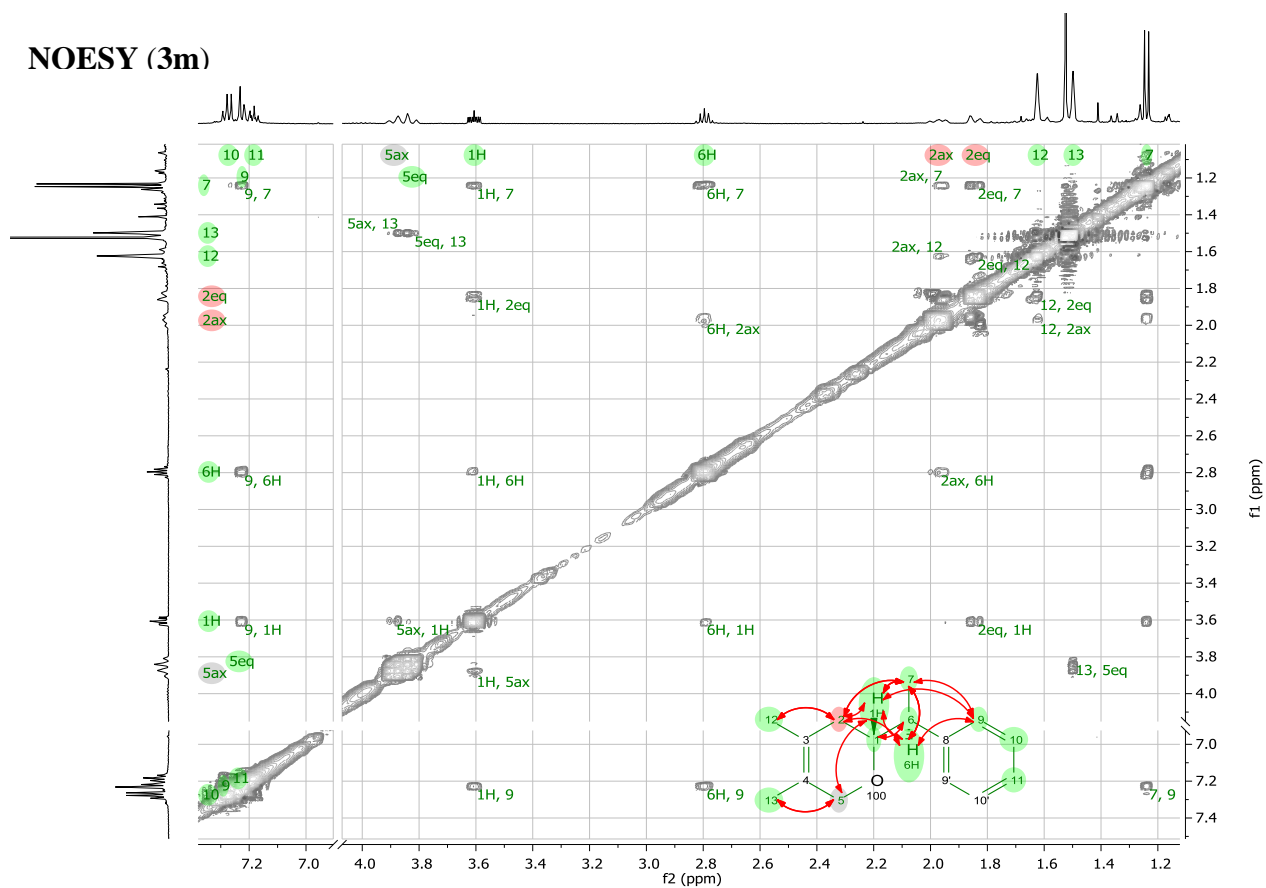

# COSY(3m)

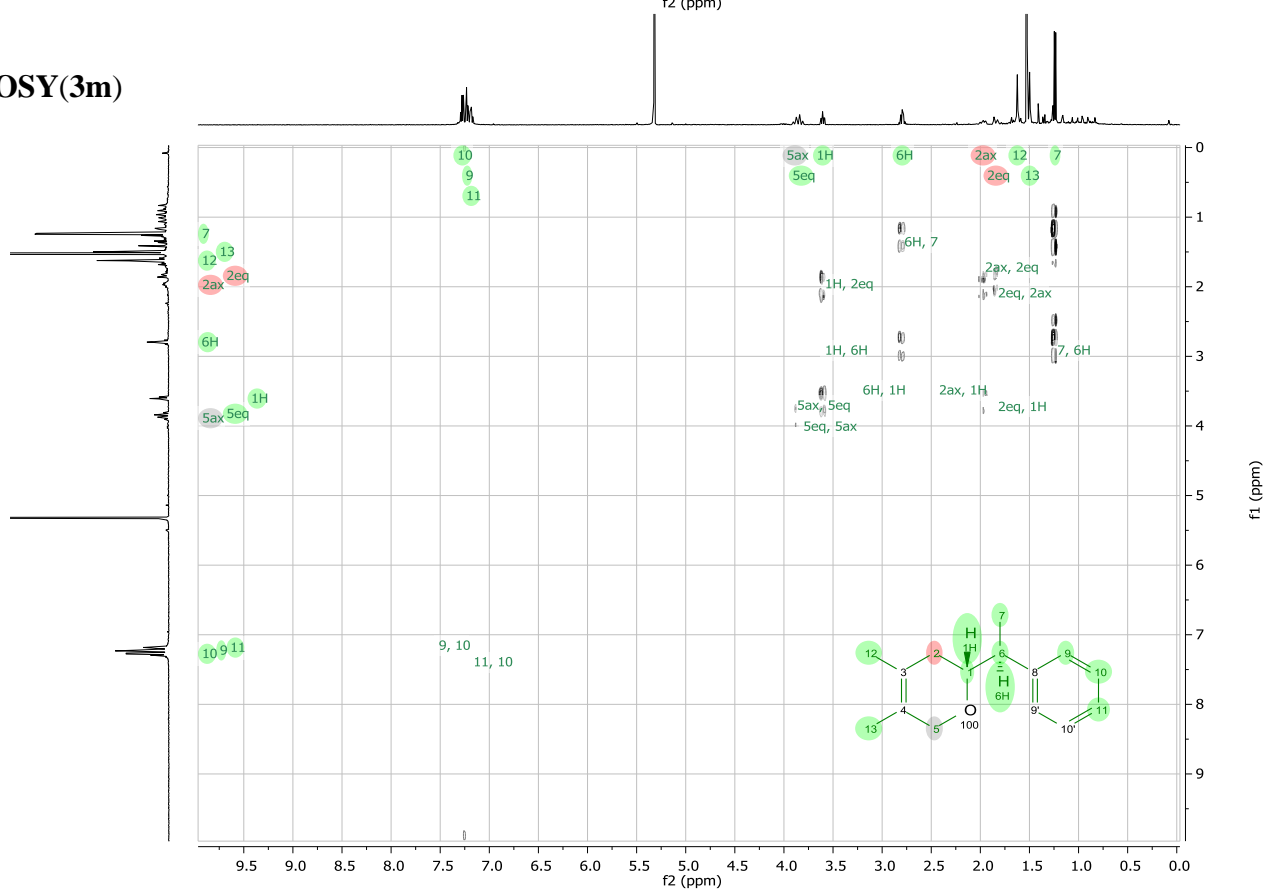



HSQC (3m)

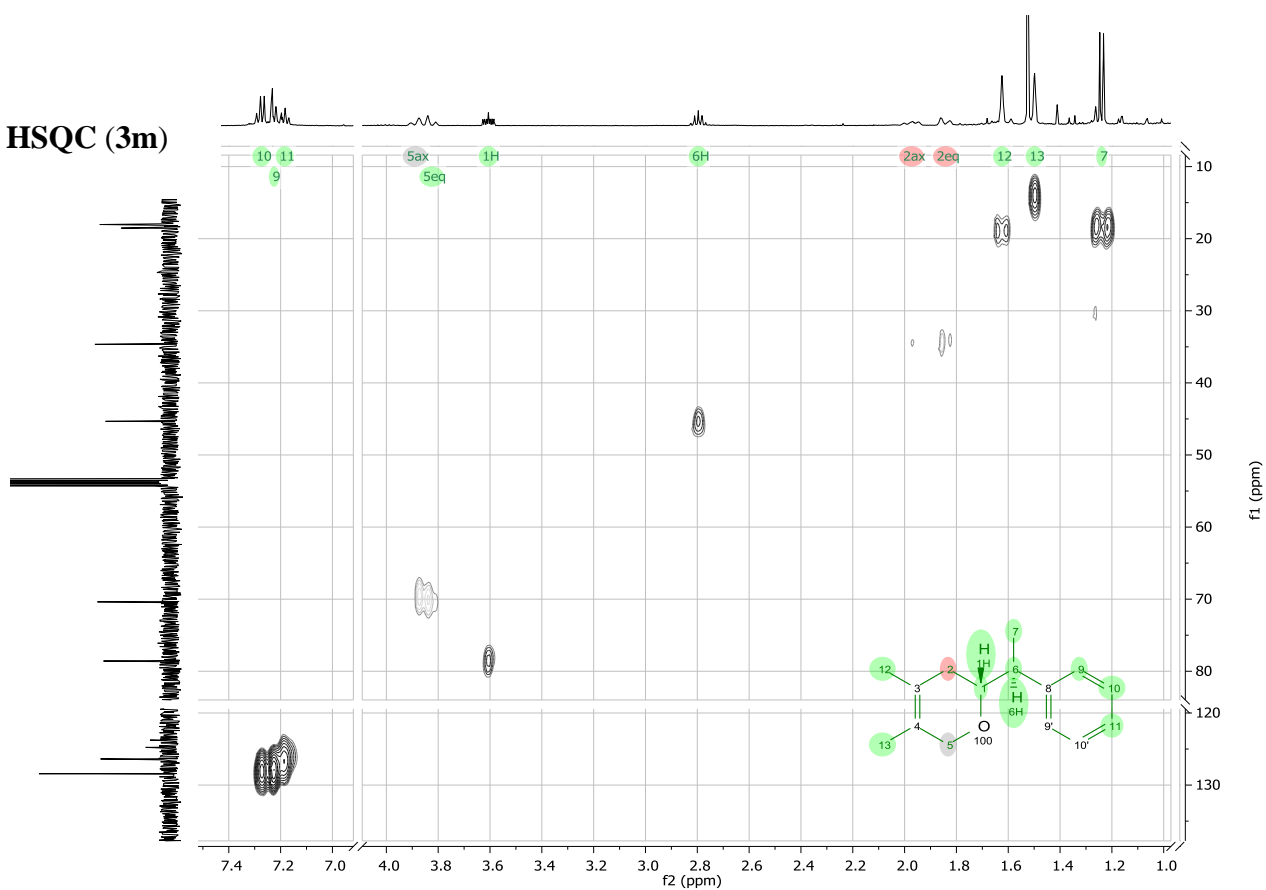

# <sup>1</sup>H NMR (3n)

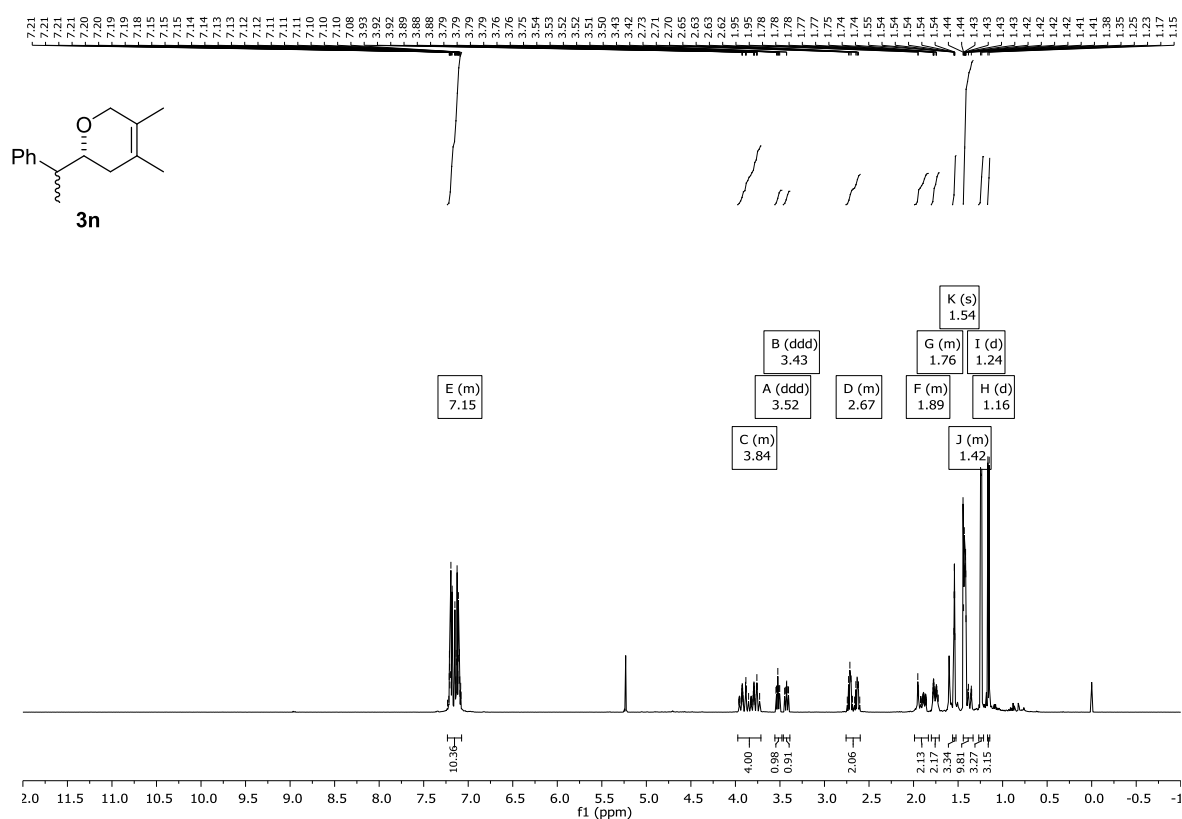

# <sup>13</sup>C NMR (3n)

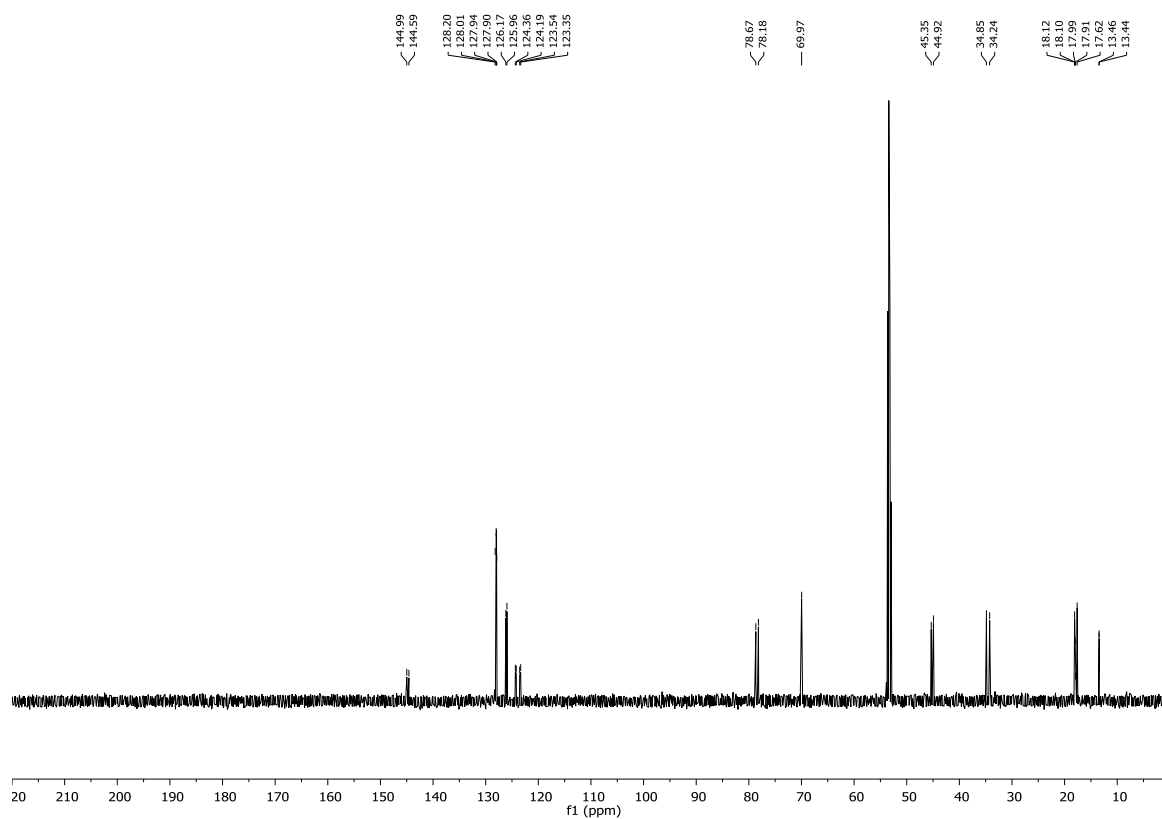

# <sup>1</sup>H NMR (3o)

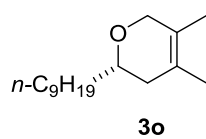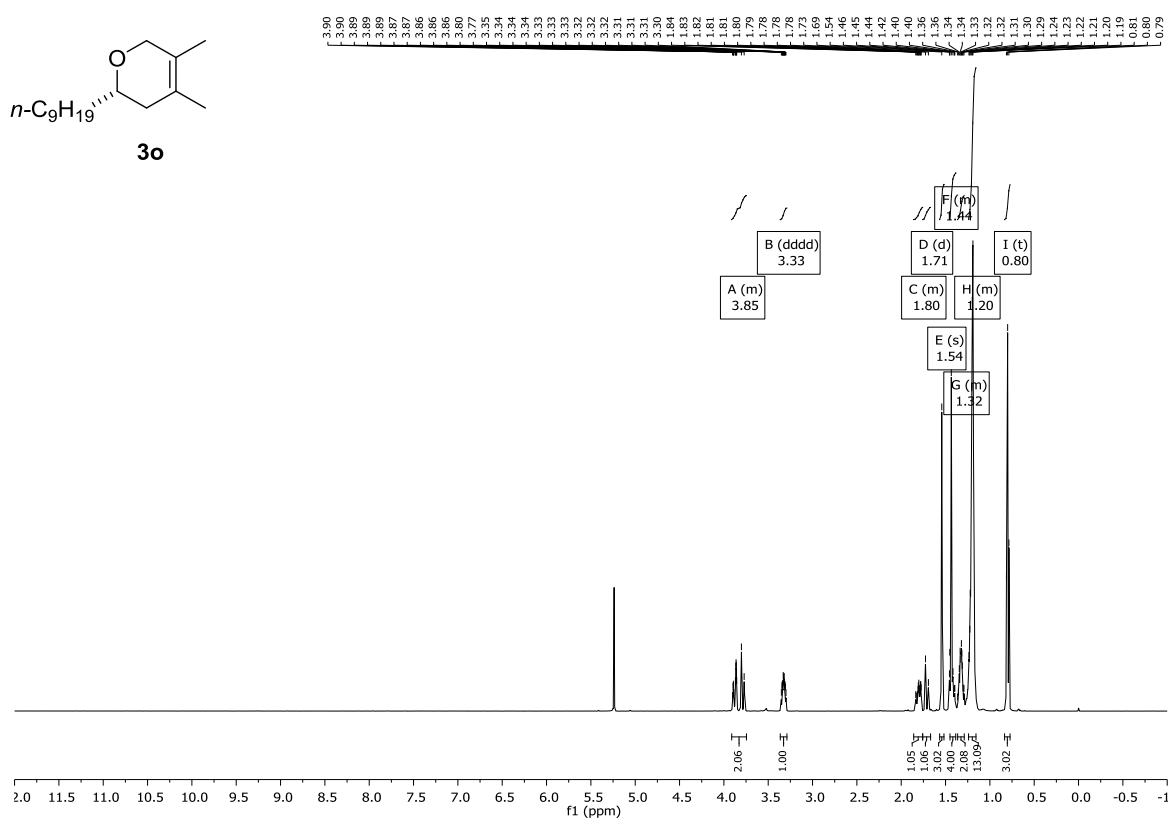

# <sup>13</sup>C NMR (3o)

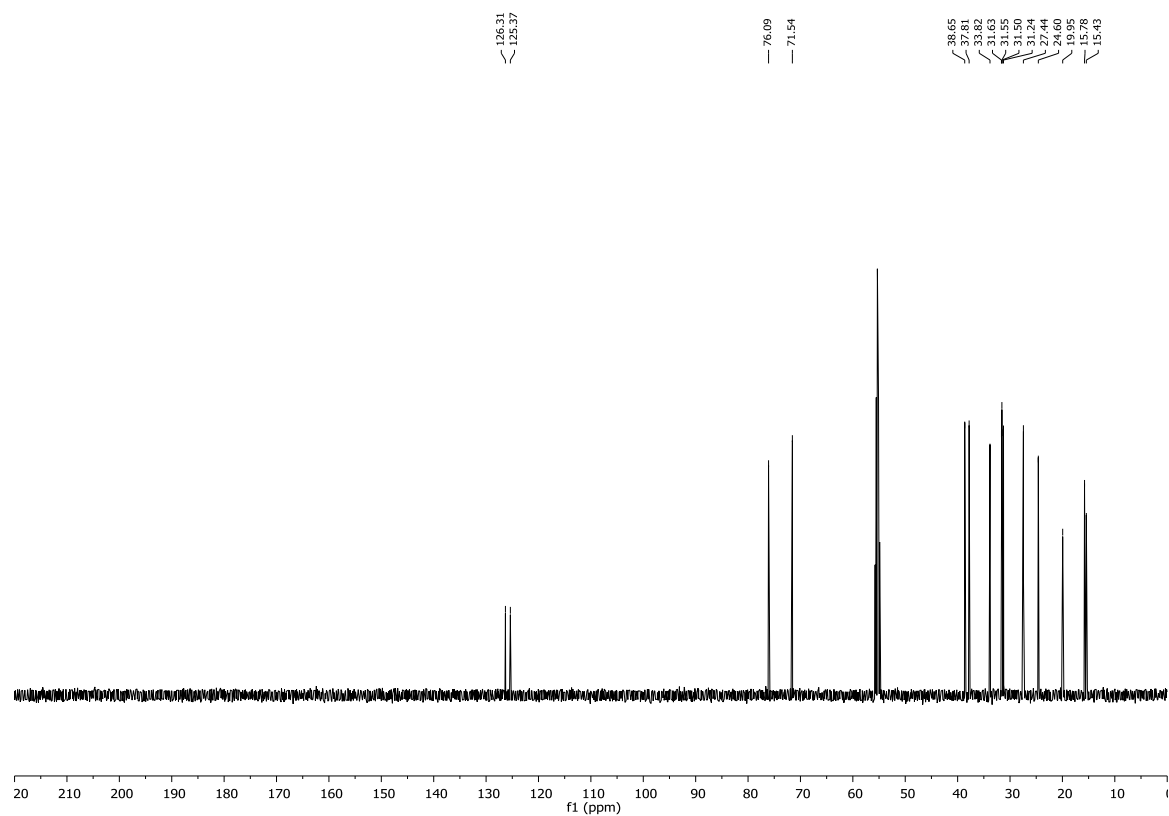

# <sup>1</sup>H NMR (S9)

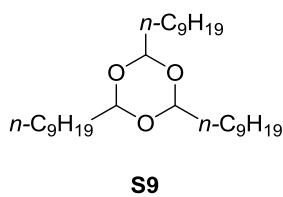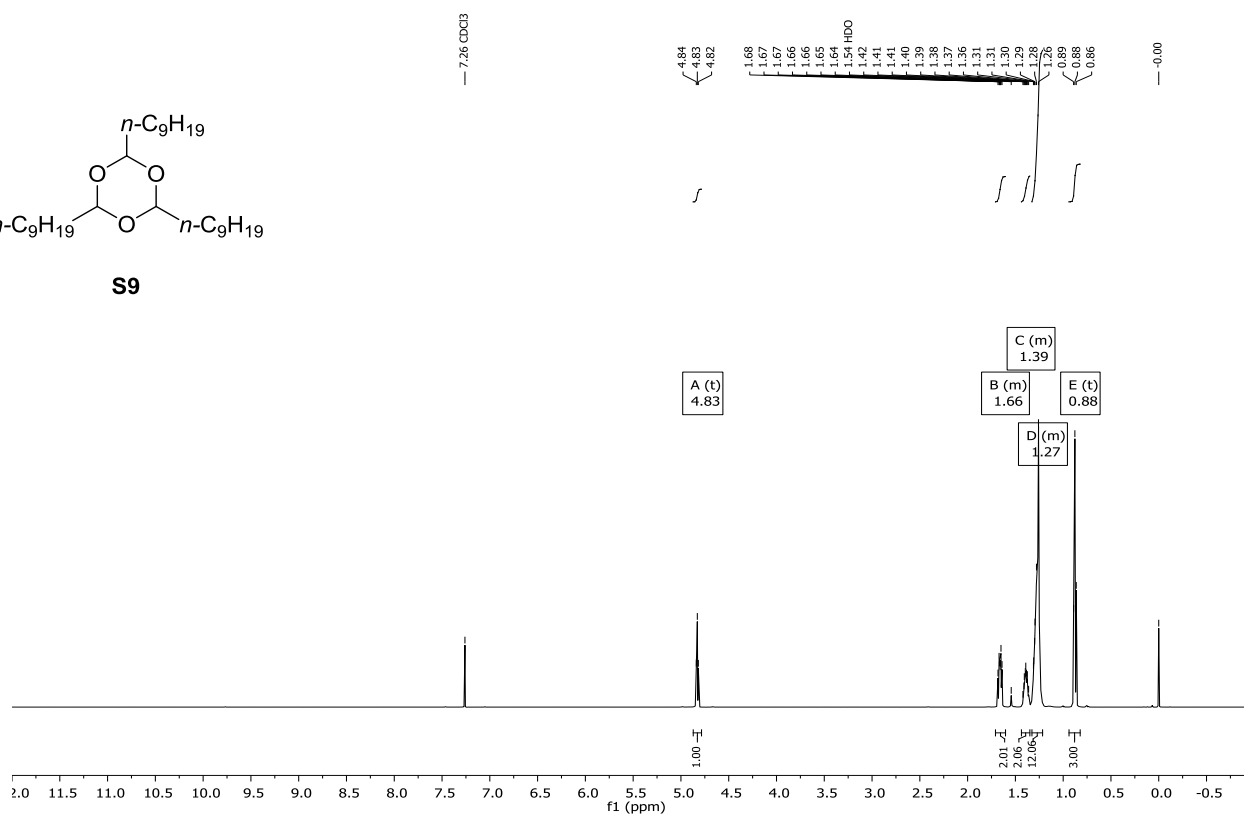

# <sup>13</sup>C NMR (S9)

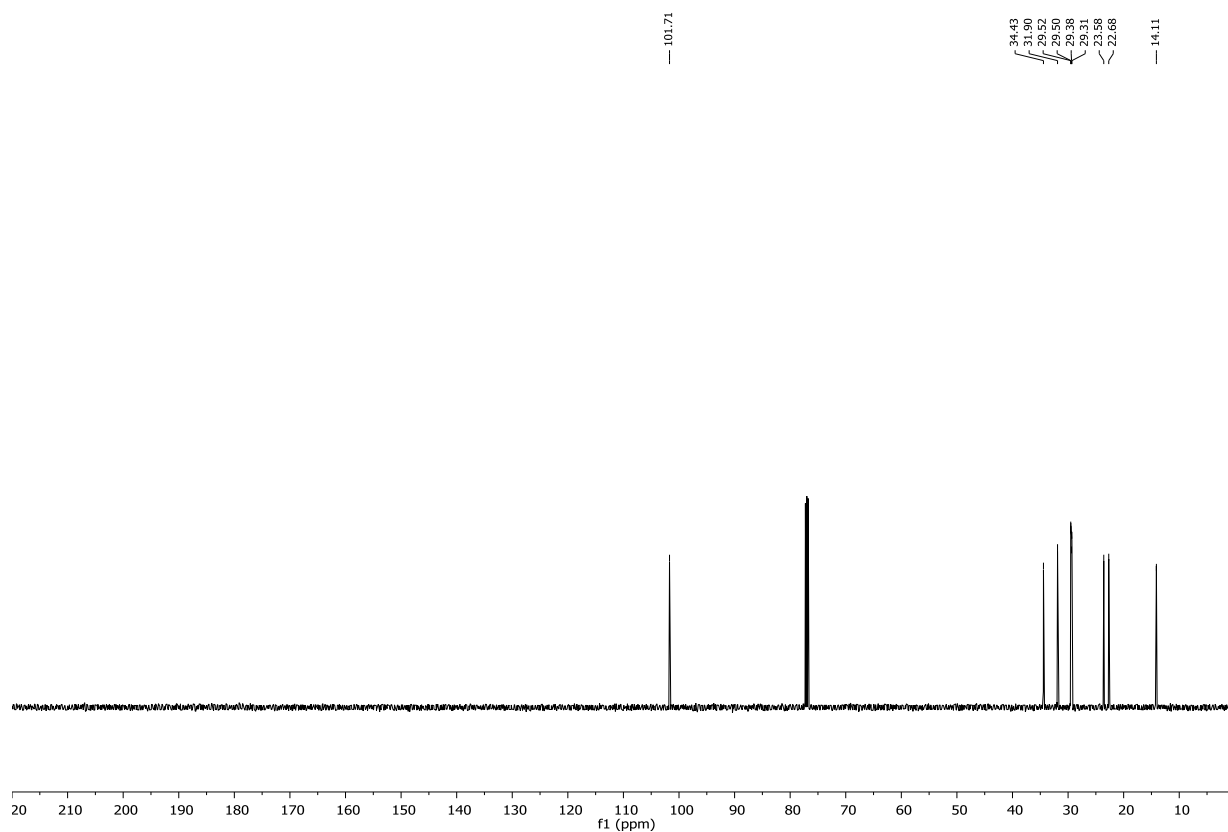

Chemical structure of **3p** is shown as an inset. The  $^1\text{H}$  NMR spectrum (CDCl<sub>3</sub>) shows peaks assigned to protons A through G, with integration values and chemical shifts provided.

| Assignment | Chemical Shift (ppm) | Integration |
|------------|----------------------|-------------|
| A (d)      | 3.88                 | 1.00        |
| B (d)      | 3.79                 | 1.00        |
| C (m)      | 3.34                 | 3.00        |
| D (m)      | 1.76                 | 4.04        |
| E (s)      | 1.54                 | 2.95        |
| F (m)      | 1.25                 | 4.07        |
| G (m)      | 1.34                 | 3.00        |

126.31  
125.33  
75.99  
71.55  
38.63  
37.64  
36.10  
34.74  
33.67  
30.03  
27.24  
19.95  
15.43

f1 (ppm)

**3q**

CC1=C(C)OC(COC2=CC=CC=C2)CC1

<sup>1</sup>H NMR spectrum (CDCl<sub>3</sub>) of compound **3q**. The x-axis represents the chemical shift in ppm (f1), ranging from -0.5 to 12.0. The spectrum shows several peaks, with the following assignments and integration values:

| Assignment | Chemical Shift (ppm) | Integration |
|------------|----------------------|-------------|
| K (m)      | 7.23                 | 4.44        |
| G (s)      | 4.37                 | 1.97        |
| H (m)      | 3.83                 | 1.81        |
| I (t)      | 3.36                 | 2.04        |
| J (dddd)   | 3.31                 | 0.84        |
| A (m)      | 1.79                 | 1.00        |
| B (m)      | 1.70                 | 2.96        |
| C (td)     | 1.53                 | 2.92        |
| D (dt)     | 1.50                 | 2.18        |
| E (dt)     | 1.43                 | 4.02        |
| F (m)      | 1.26                 | 9.03        |

Chemical shifts (ppm): 139.09, 138.19, 127.50, 127.28, 125.38, 124.40, 122.45, 74.15, 72.66, 70.52, 69.63, 36.73, 35.86, 30.07, 29.85, 29.65, 29.44, 26.16, 25.47, 18.04, 13.53.

# <sup>1</sup>H NMR (3r)

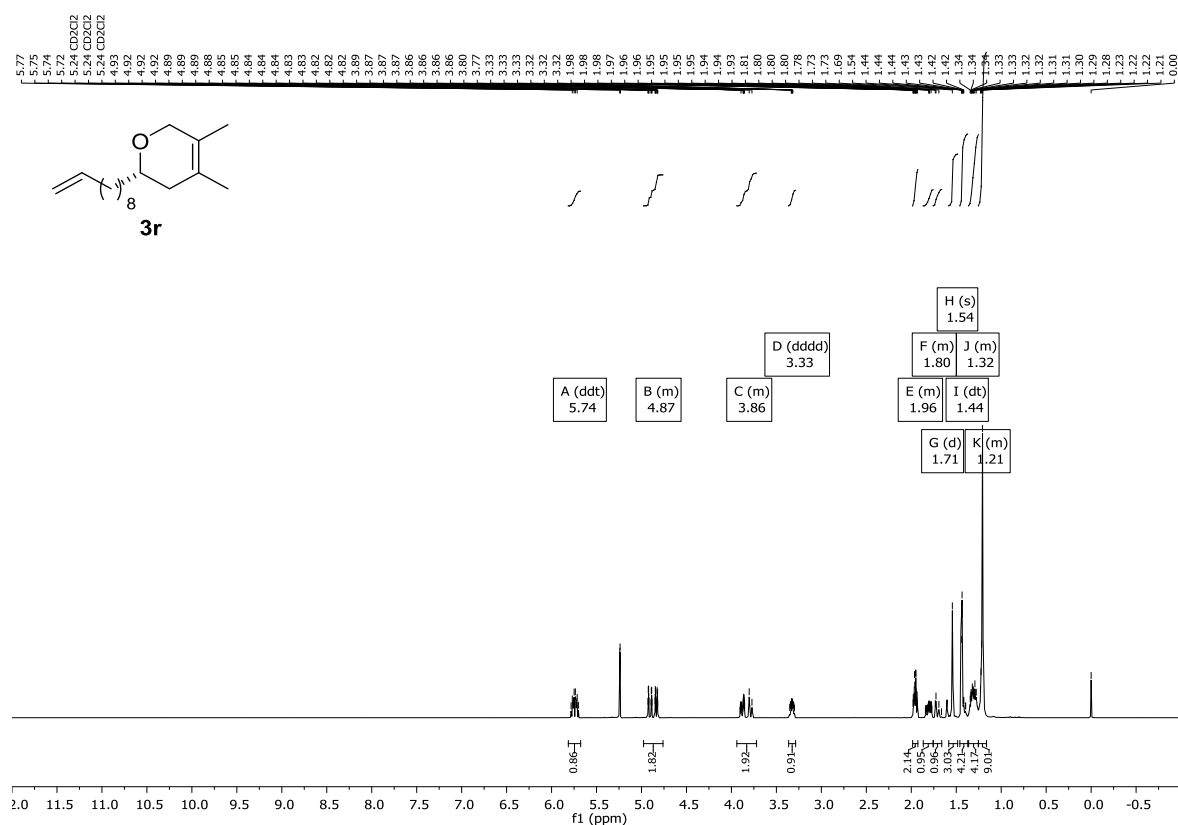

# <sup>13</sup>C NMR (3r)

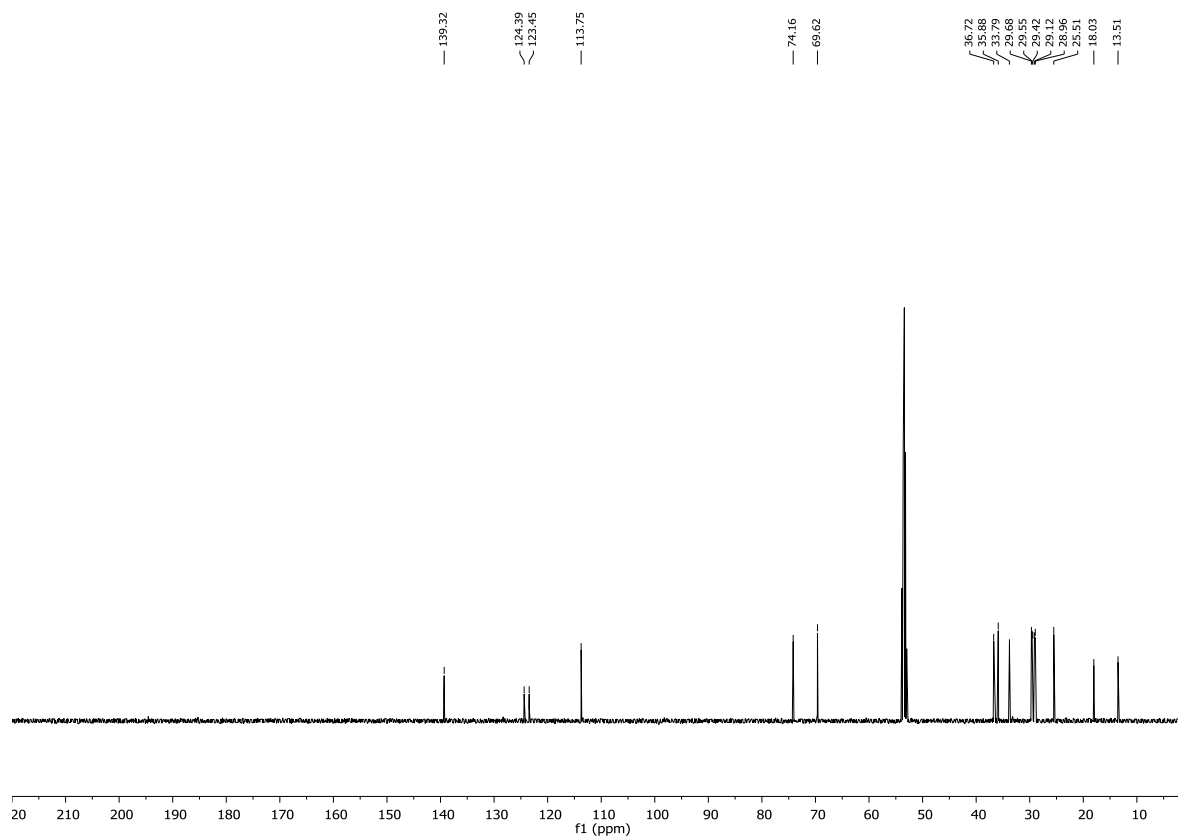

# <sup>1</sup>H NMR (3s)

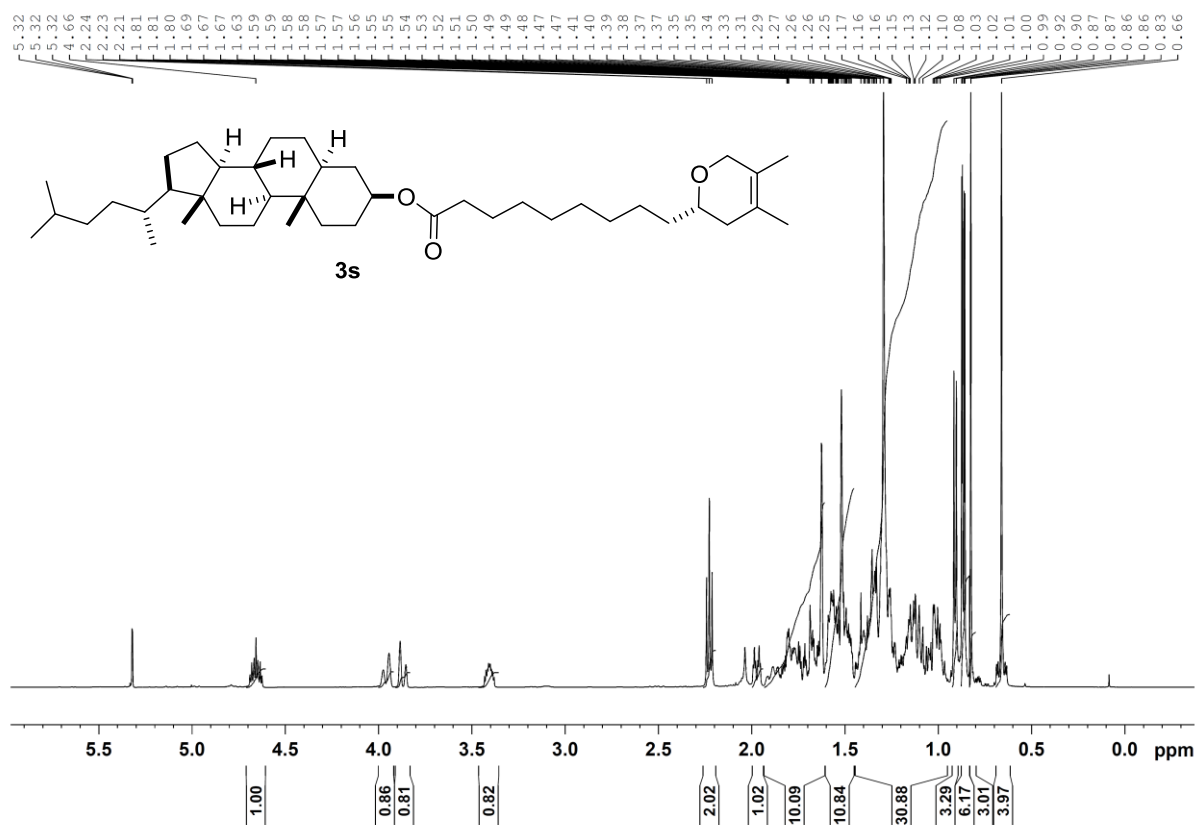

# <sup>13</sup>C NMR (3s)

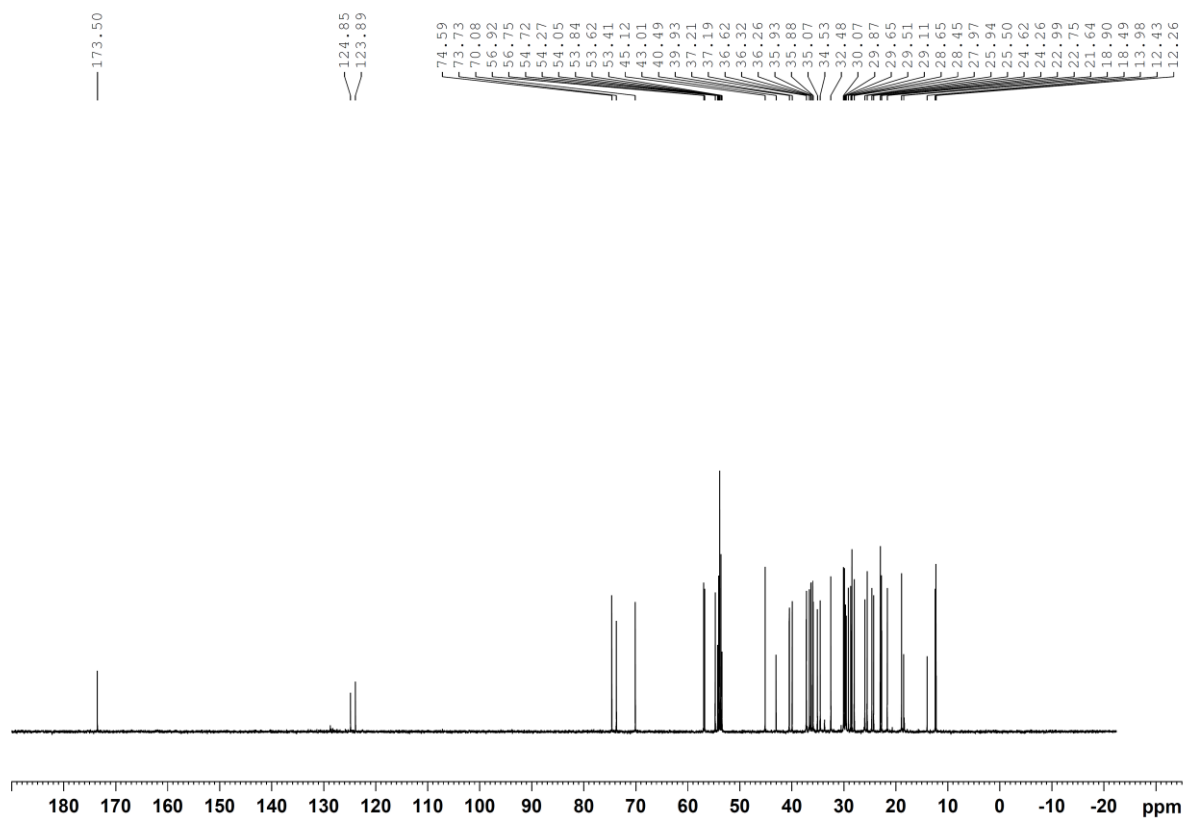



**<sup>1</sup>H NMR (3t)**

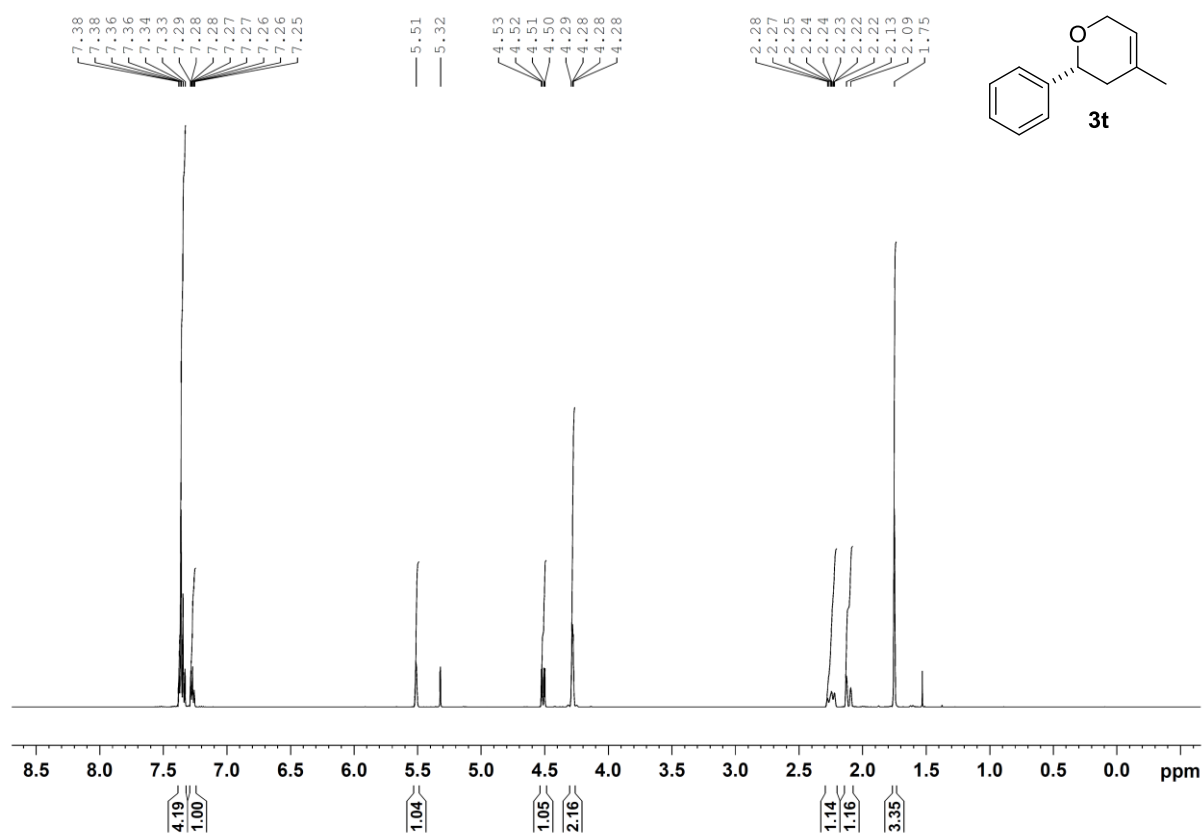

**<sup>13</sup>C NMR (3t)**

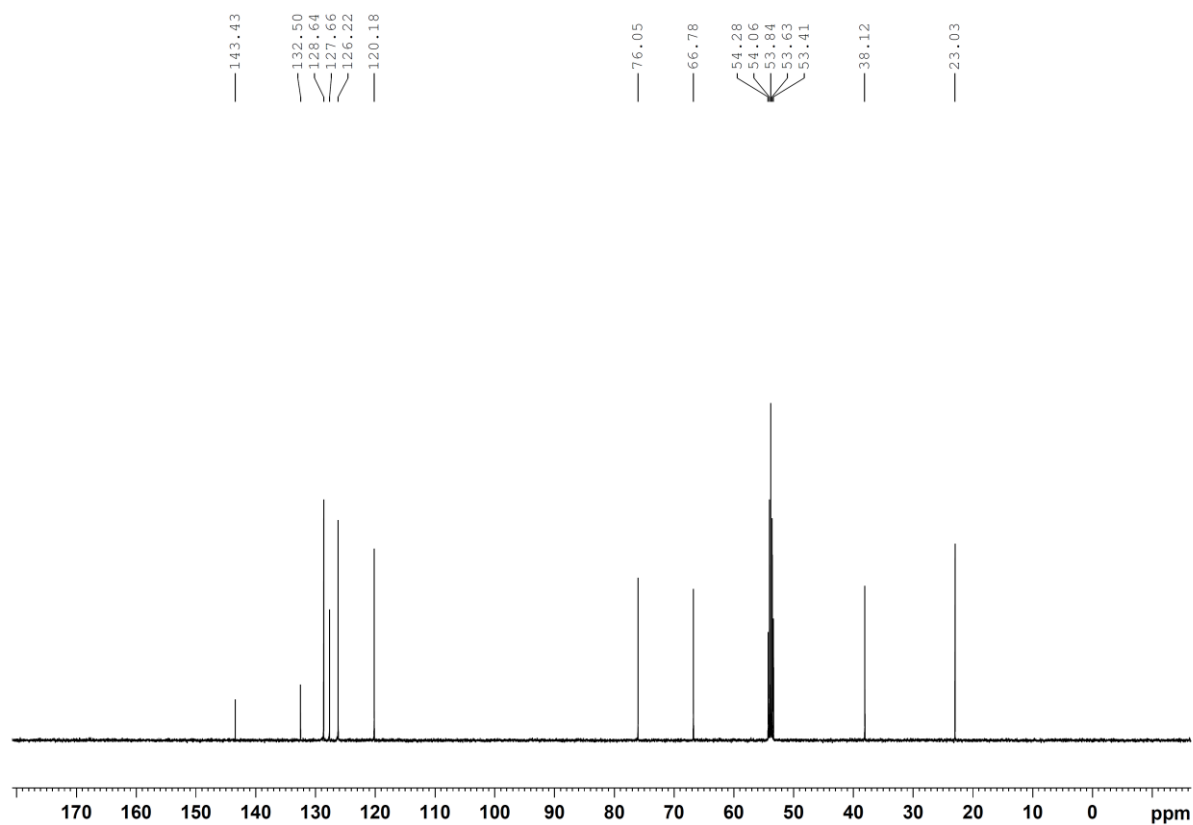

**<sup>1</sup>H NMR (3v)**

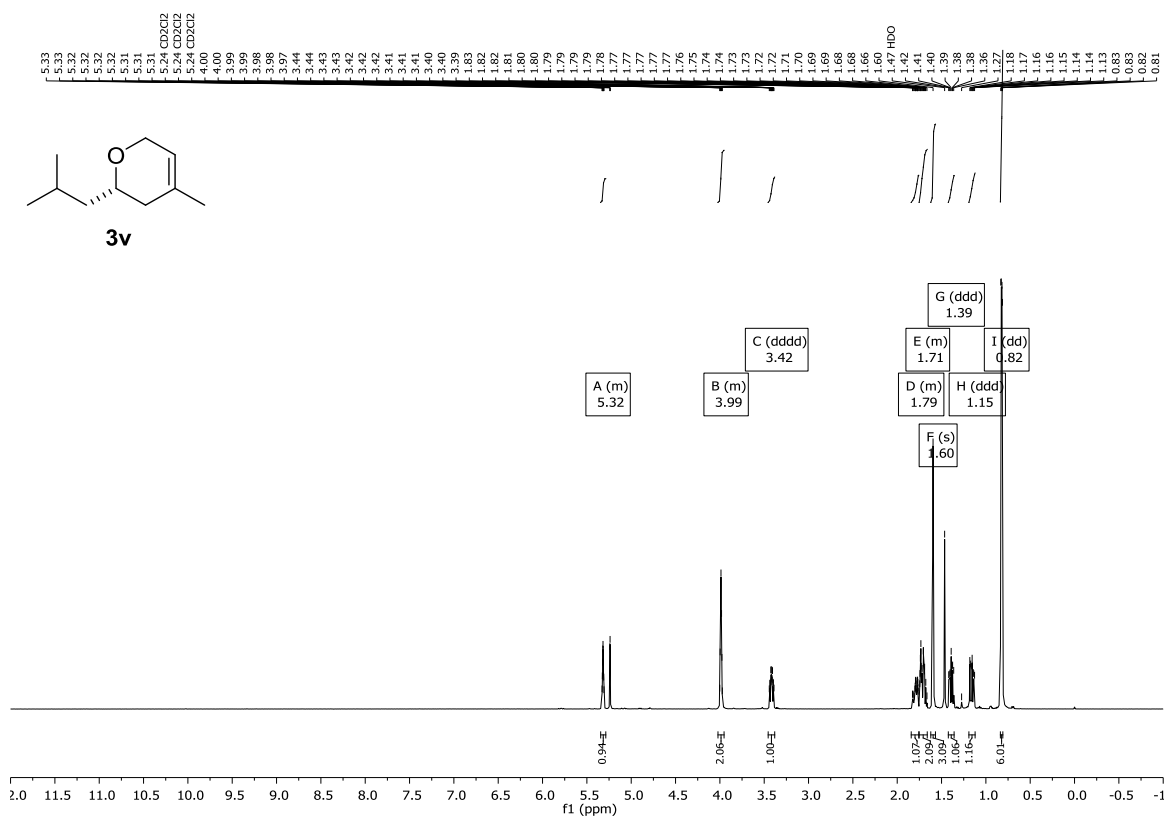

**$^{13}\text{C}$  NMR (3v)**

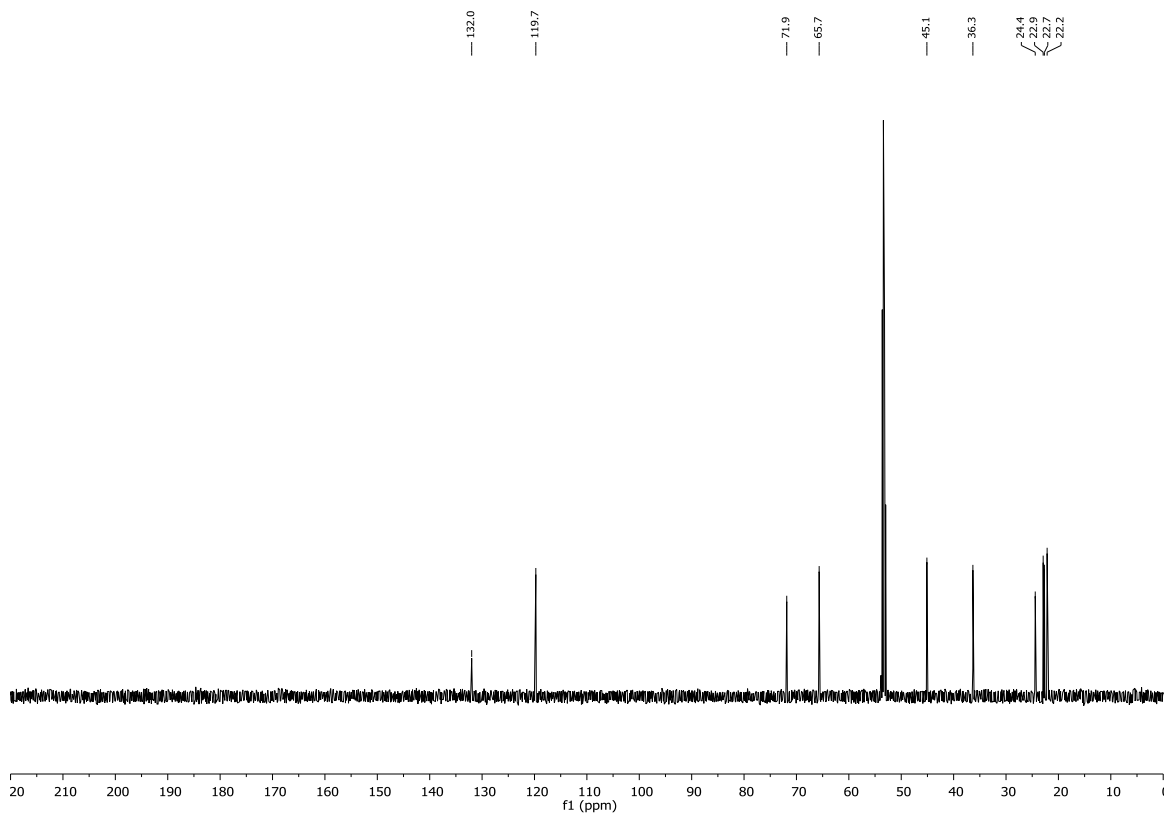

**<sup>1</sup>H NMR (3w)**

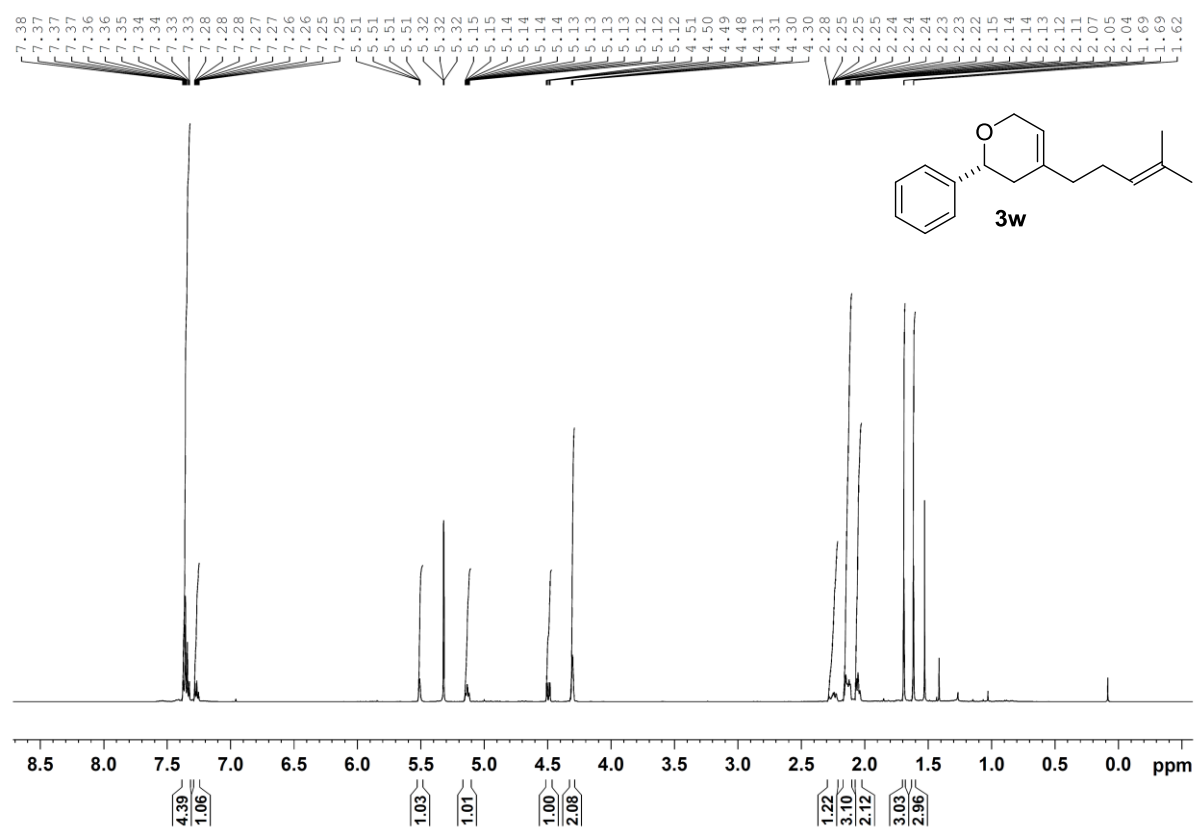

**<sup>13</sup>C NMR (3w)**

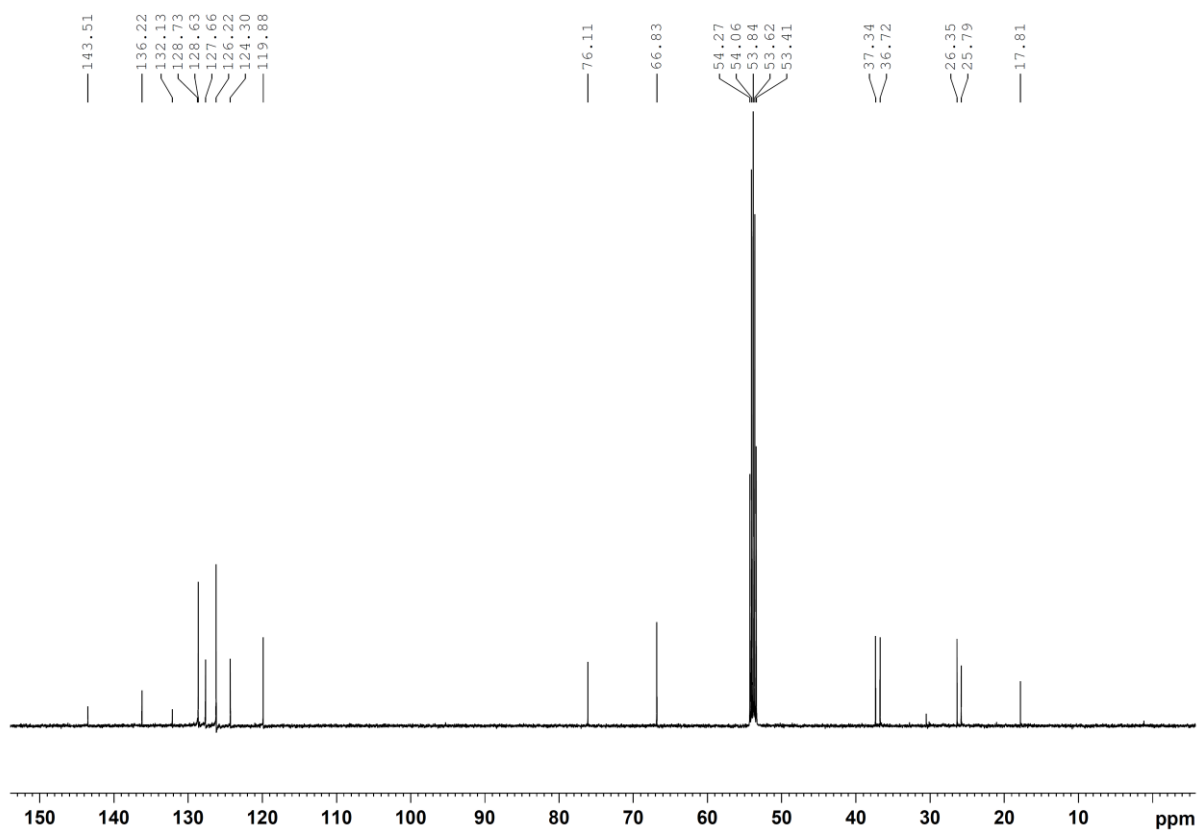

**<sup>1</sup>H NMR (3x)**

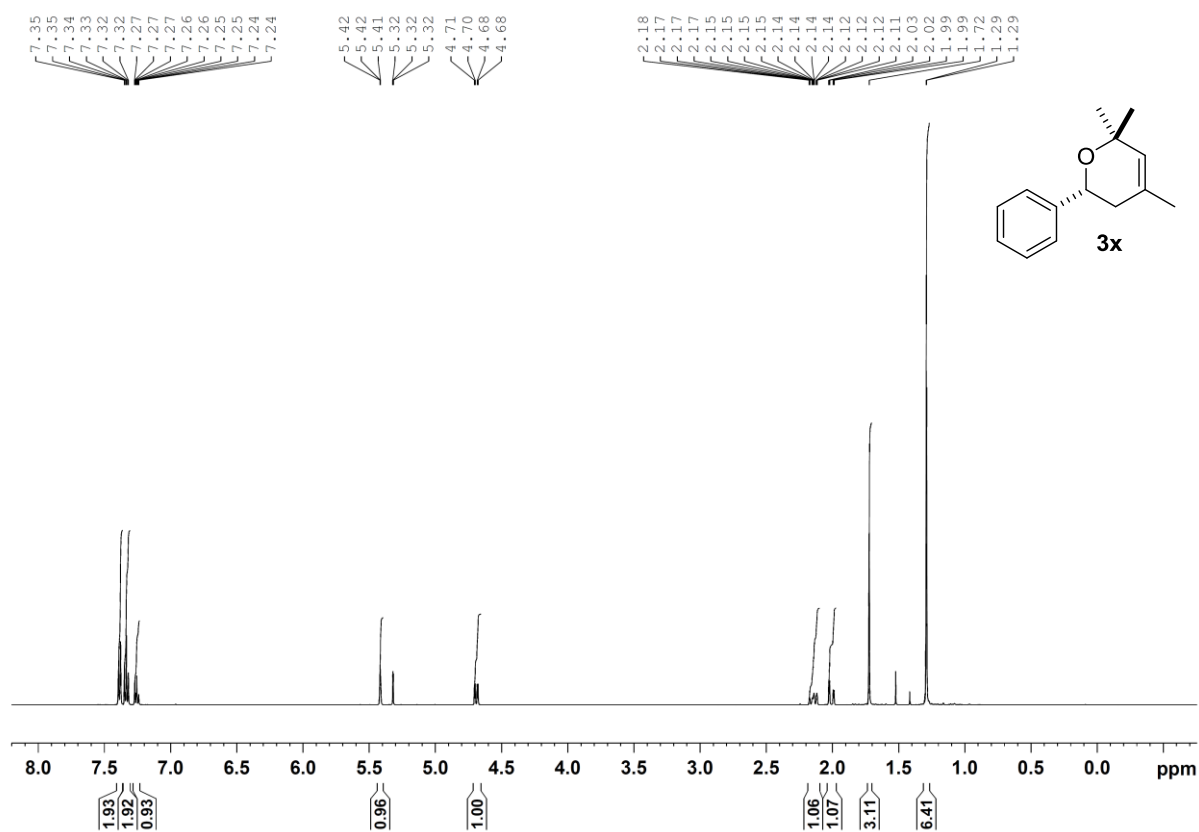

**<sup>13</sup>C NMR (3x)**

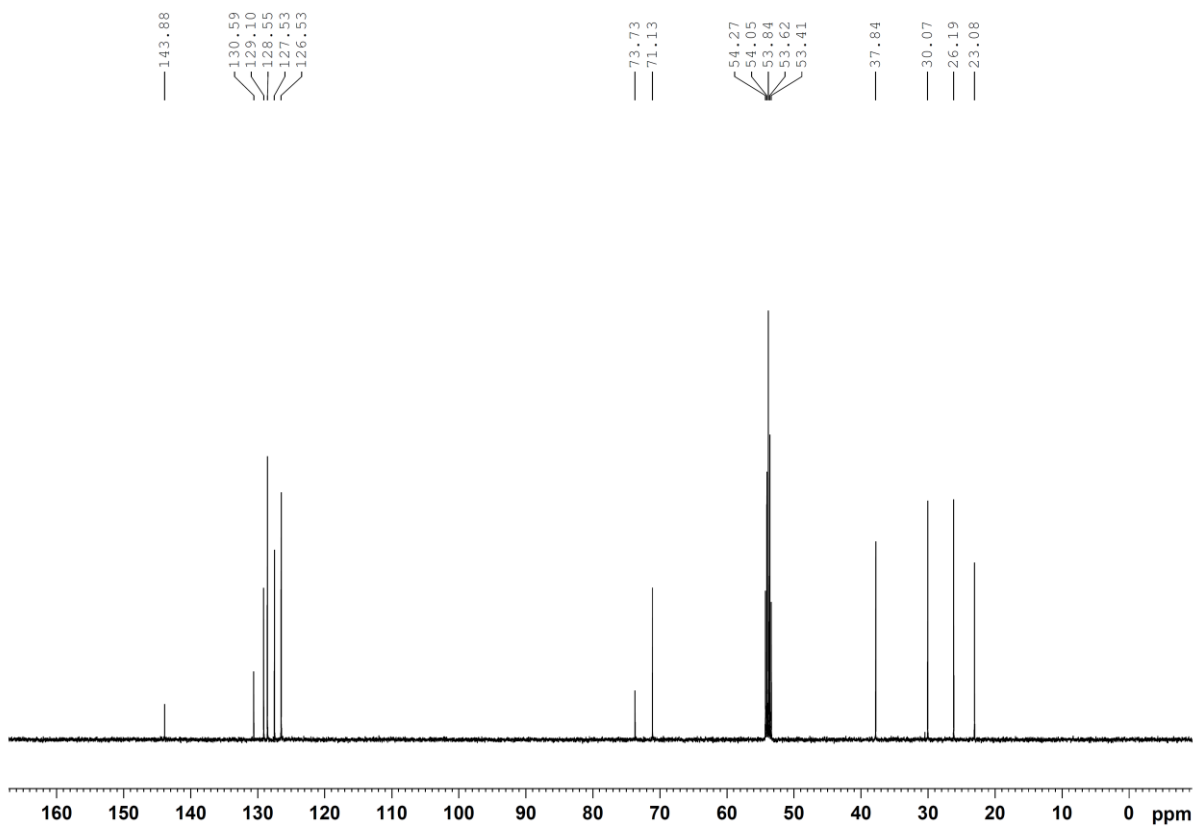

**$^1\text{H}$  NMR (3y)**

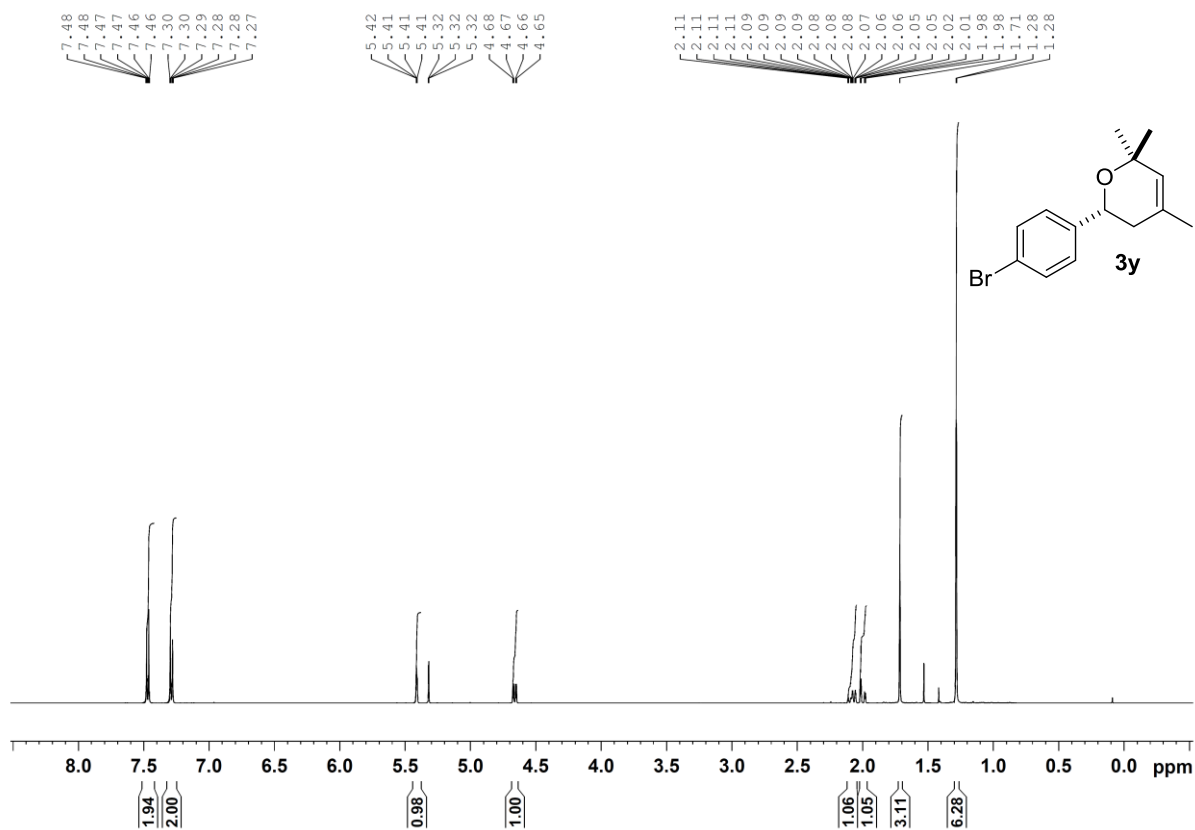

**$^{13}\text{C}$  NMR (3y)**

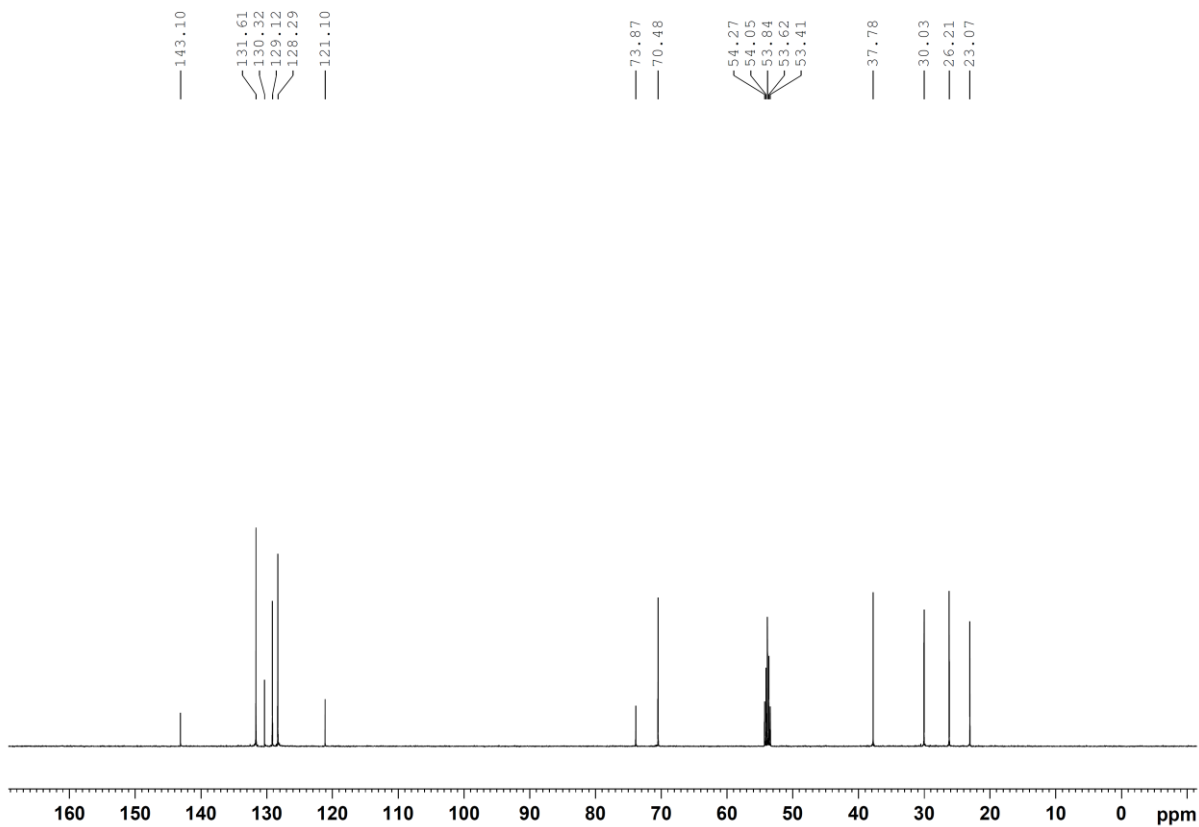

**<sup>1</sup>H NMR (3z)**

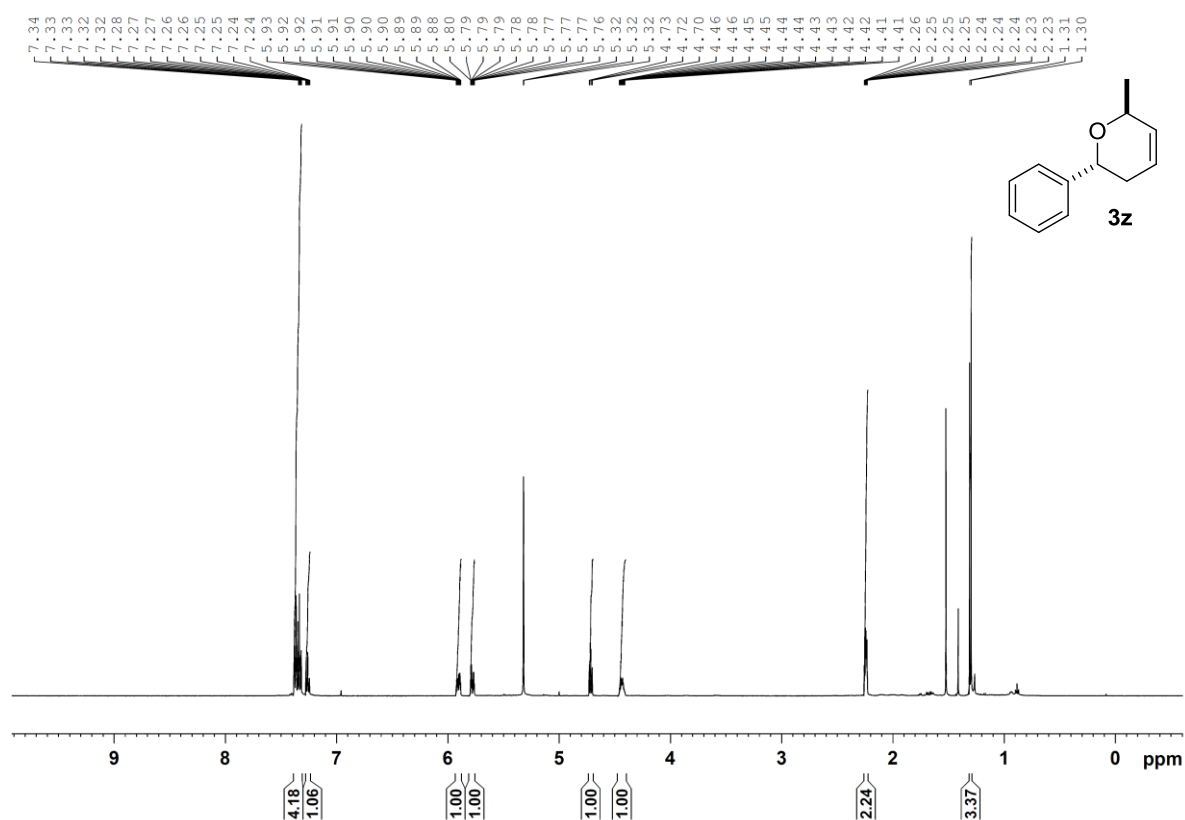

**<sup>13</sup>C NMR (3z)**

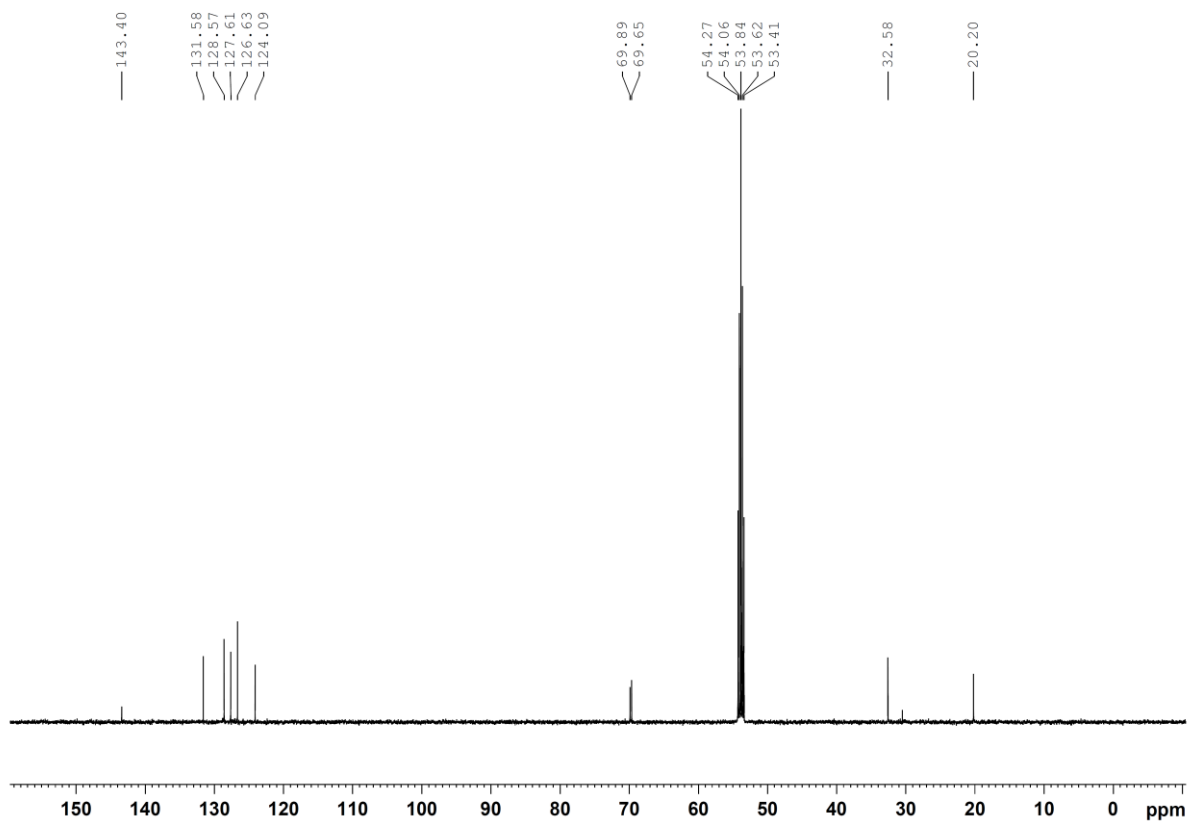

**<sup>1</sup>H NMR (3aa)**

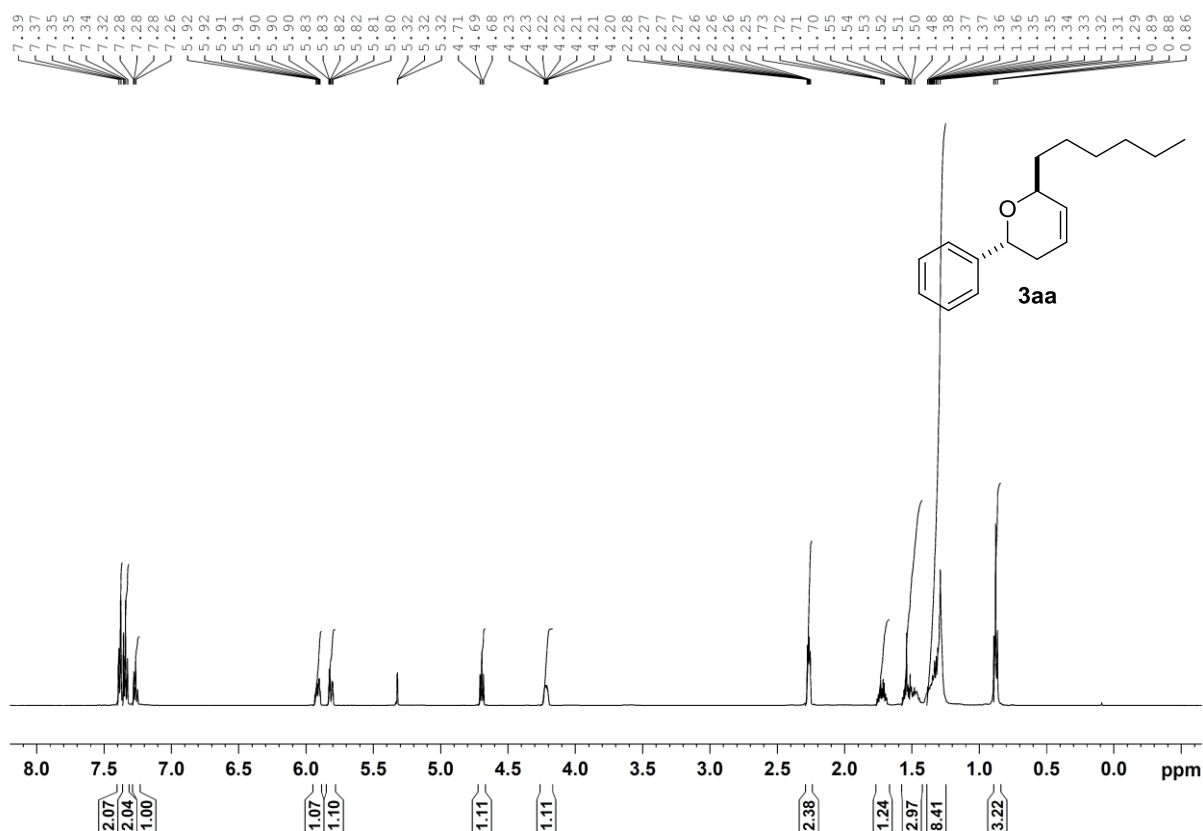

**<sup>13</sup>C NMR (3aa)**

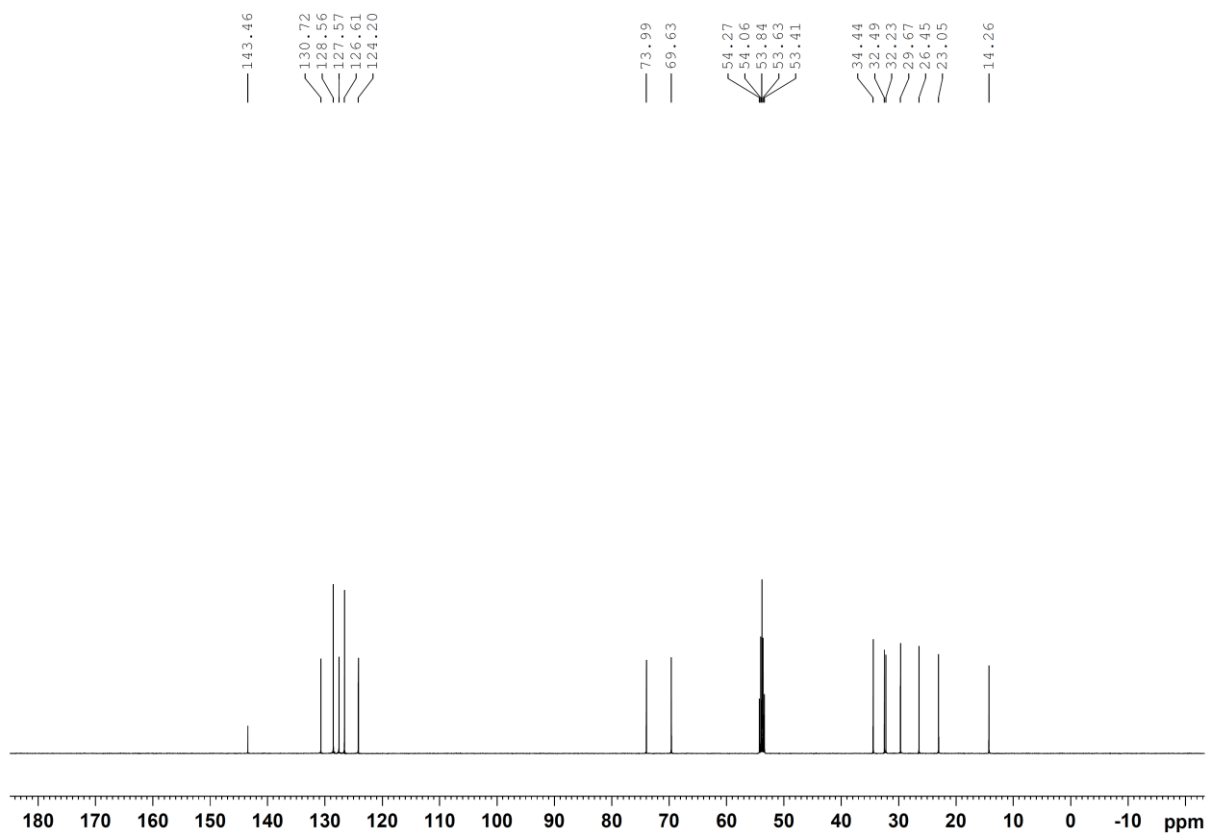

**<sup>1</sup>H NMR (*trans*-3ab)**

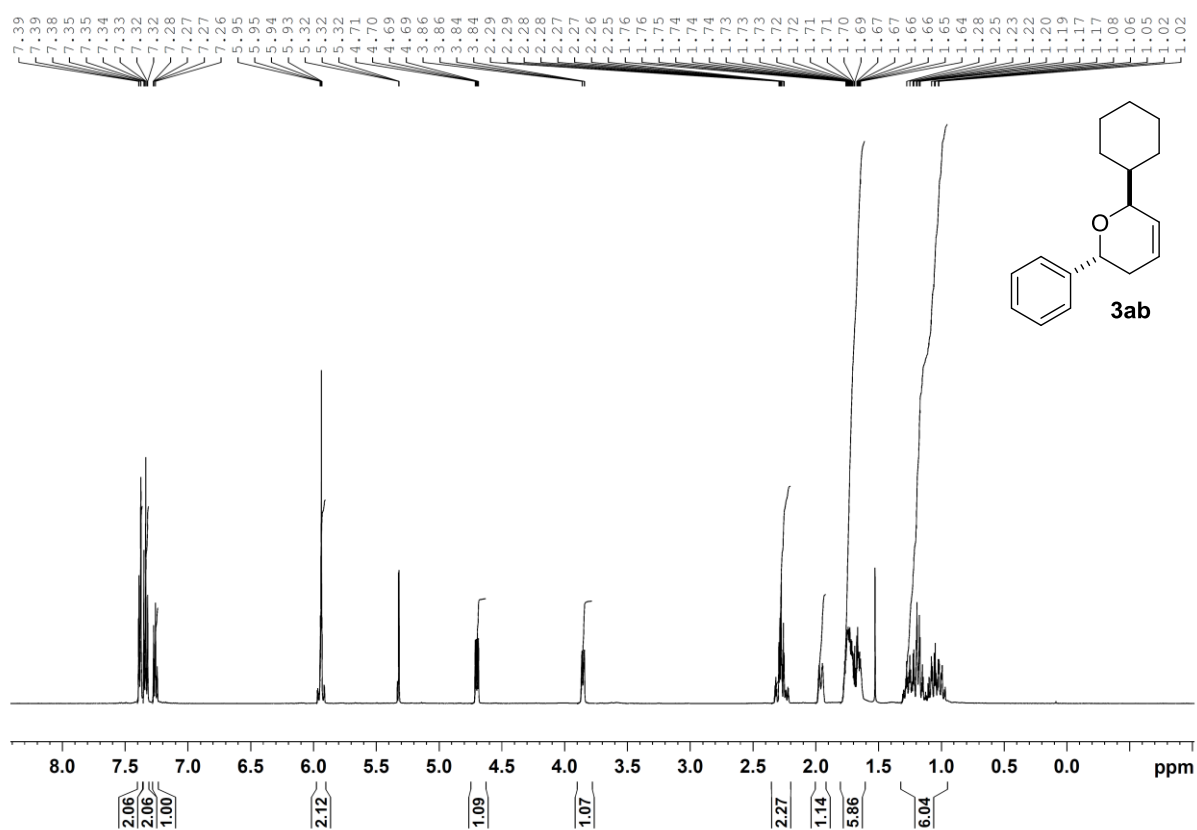

**<sup>13</sup>C NMR (*trans*-3ab)**

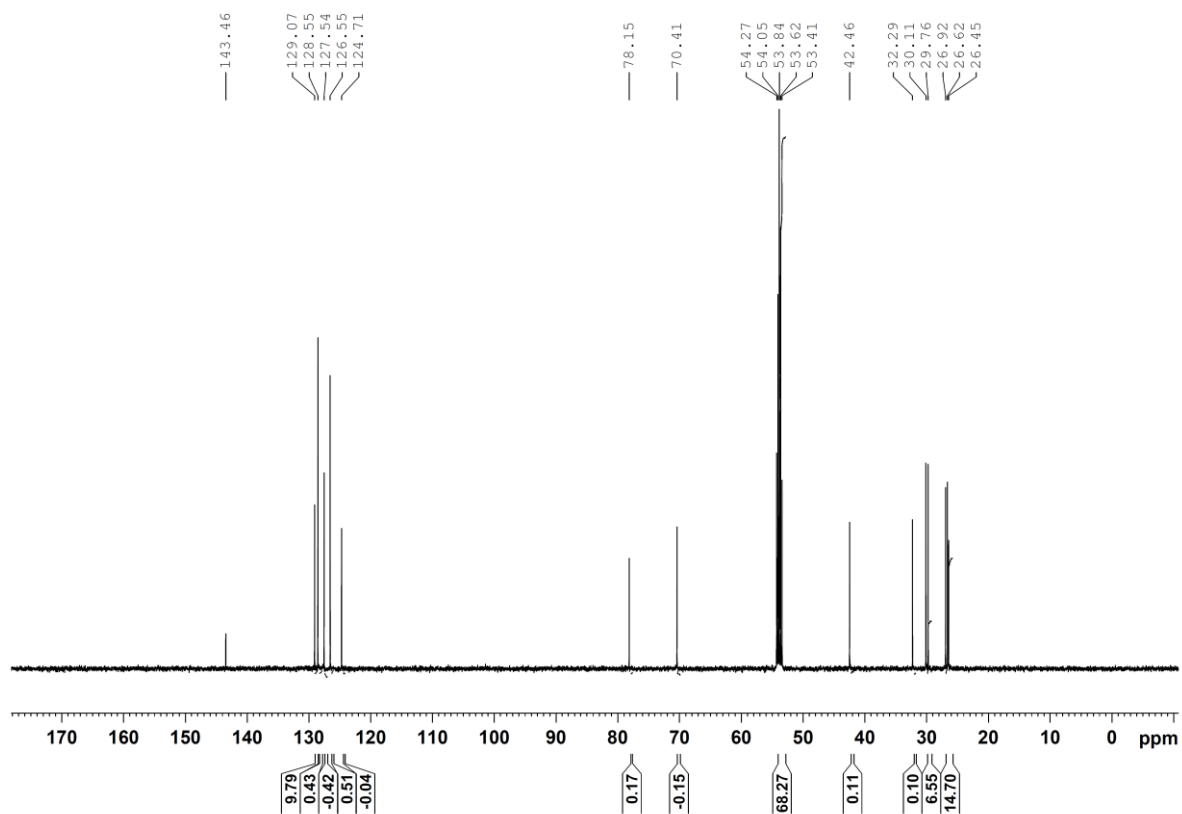



**<sup>1</sup>H NMR (*cis*-3ab)**

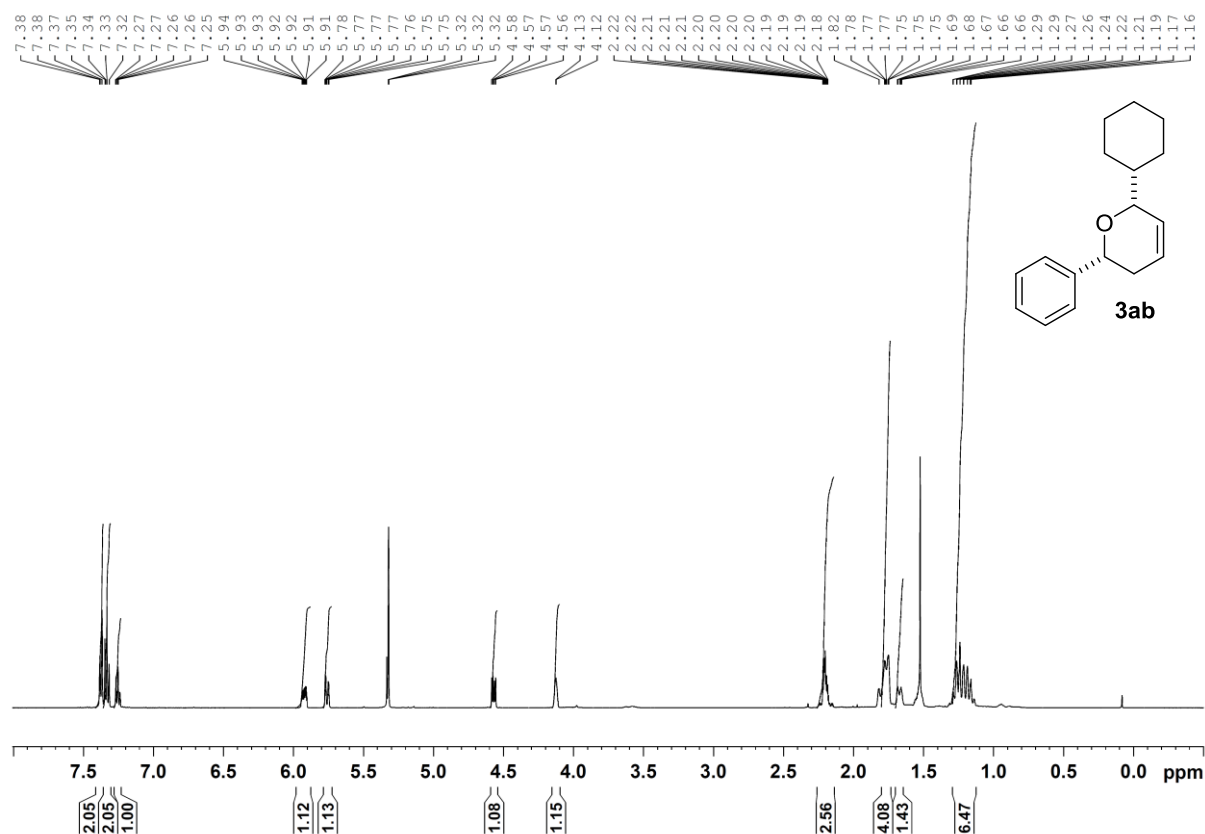

**<sup>13</sup>C NMR (*cis*-3ab)**

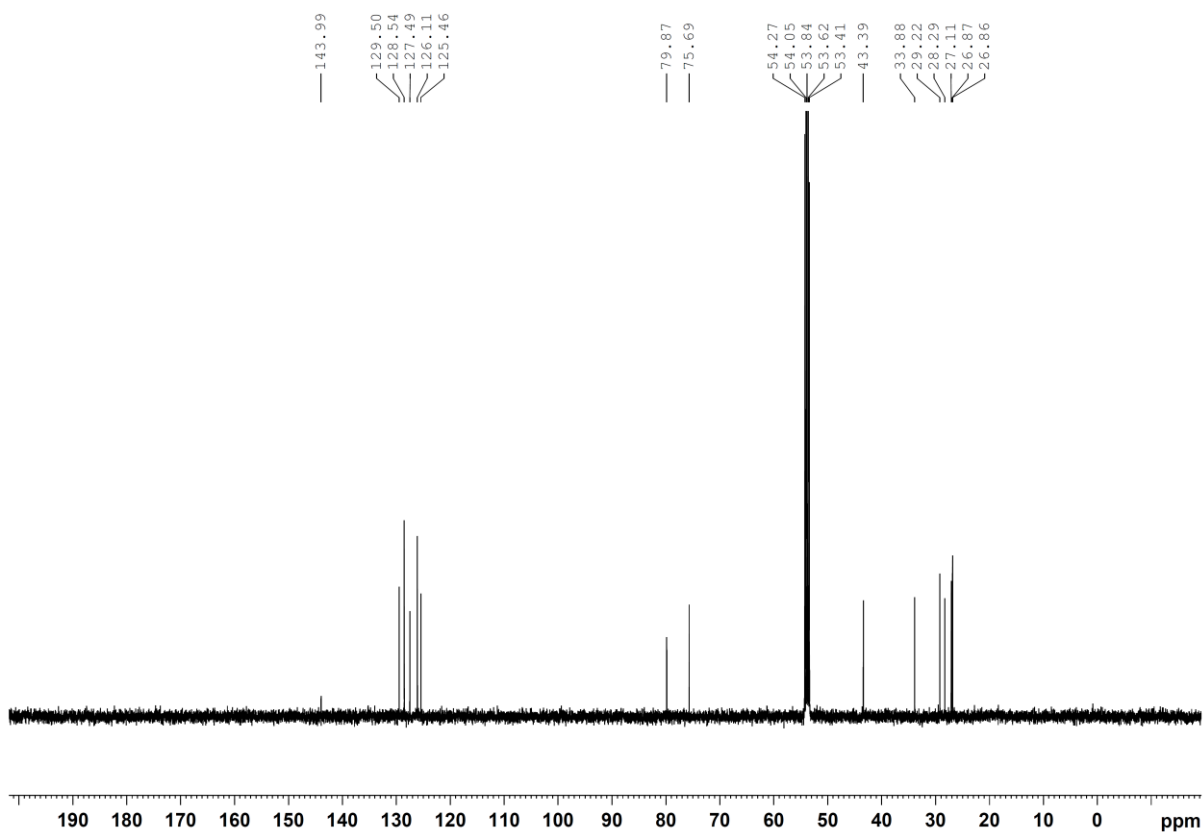

**<sup>1</sup>H NMR (3ac)**

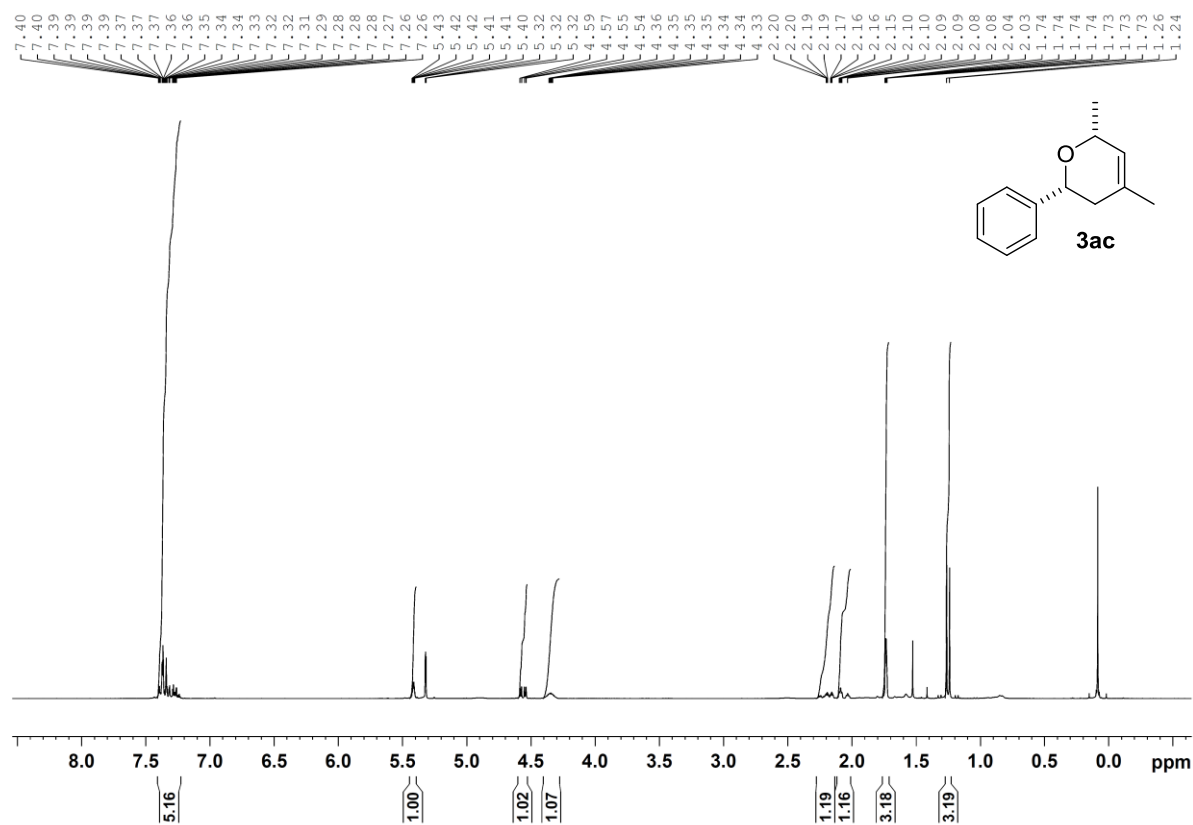

**<sup>13</sup>C NMR (3ac)**

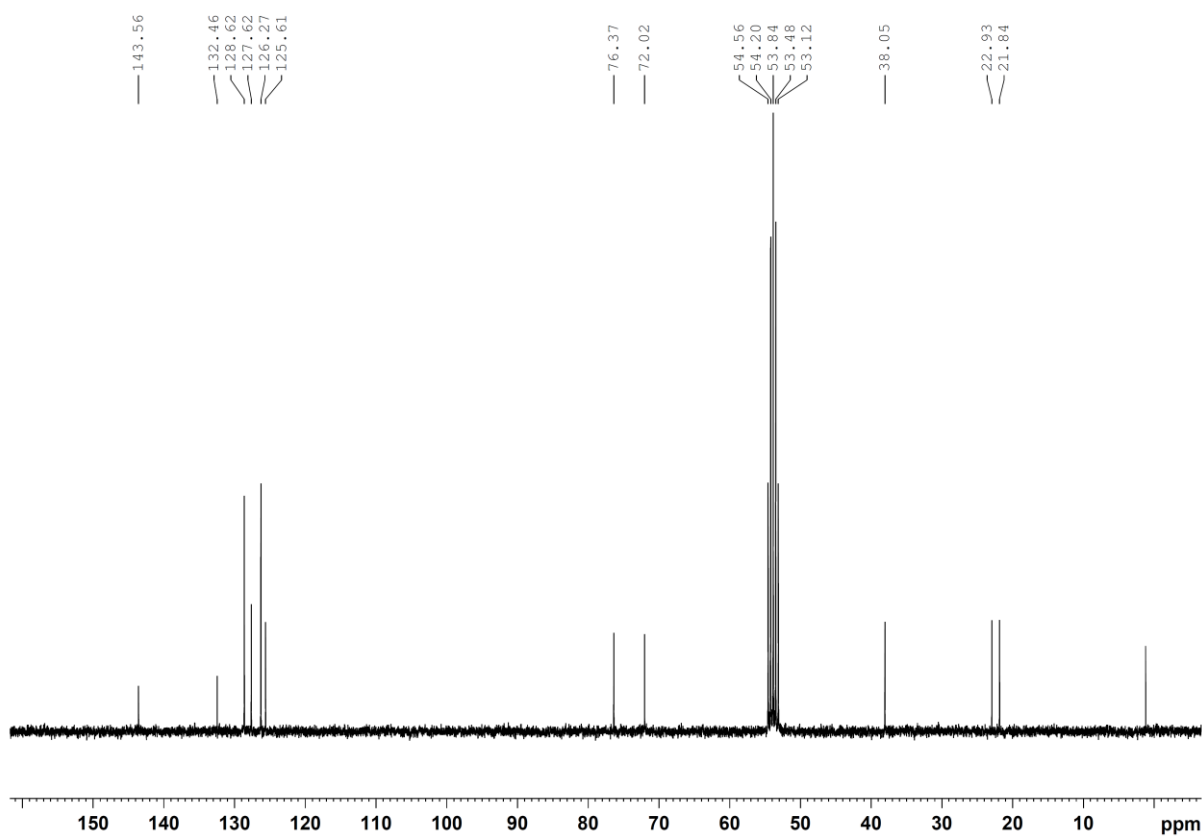

**<sup>1</sup>H NMR (3ad)**

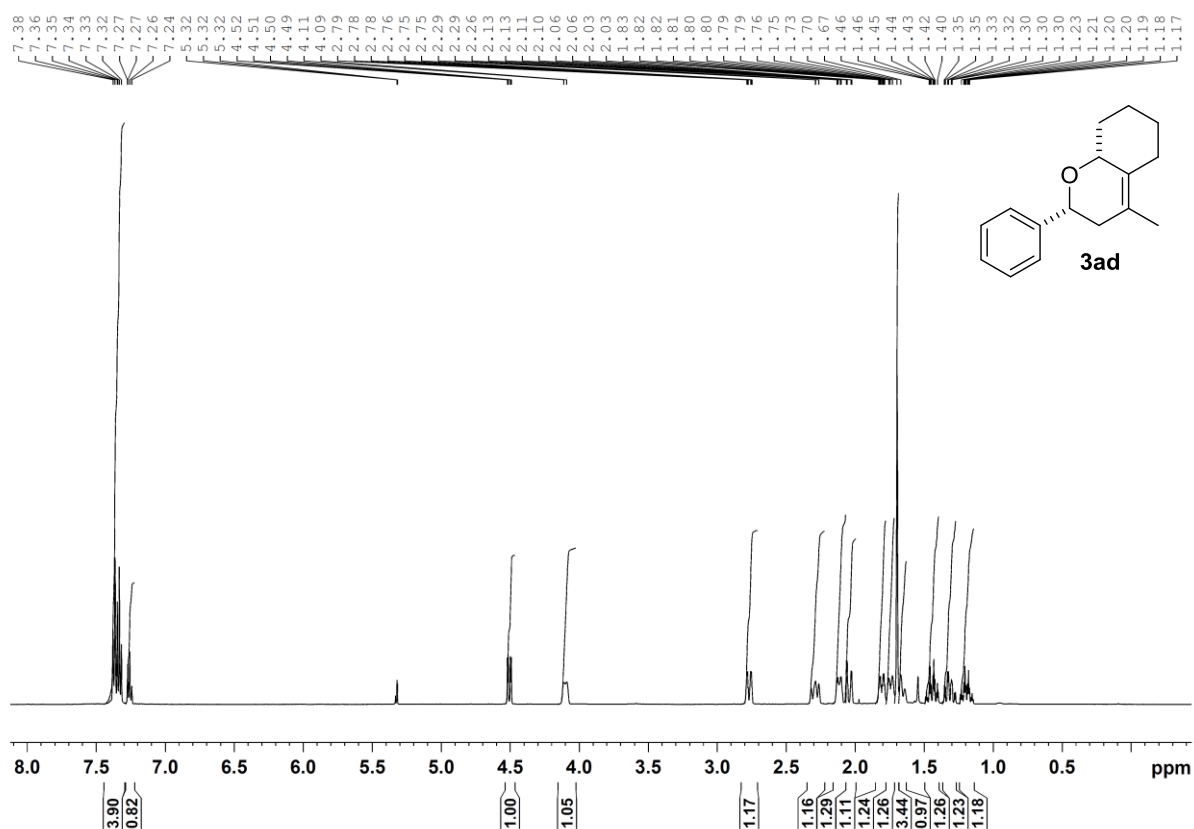

**<sup>13</sup>C NMR (3ad)**

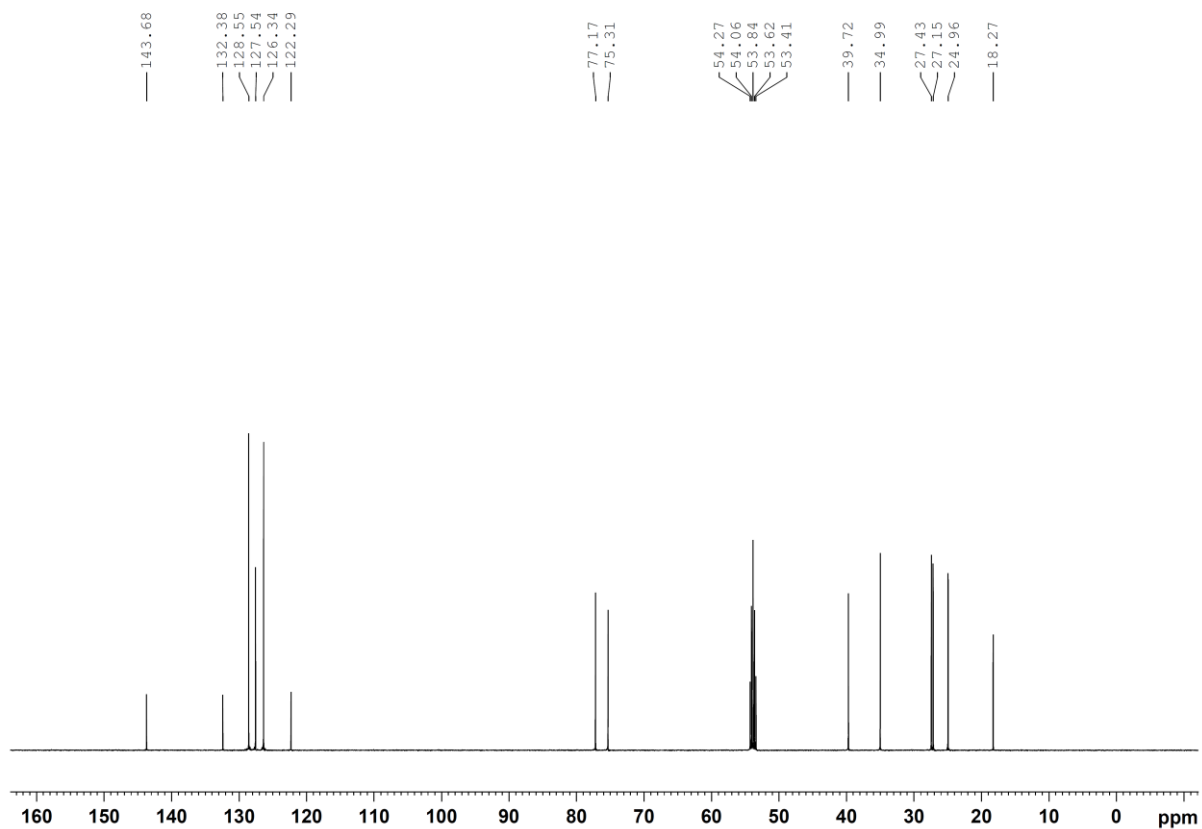

**<sup>1</sup>H NMR (3ae)**

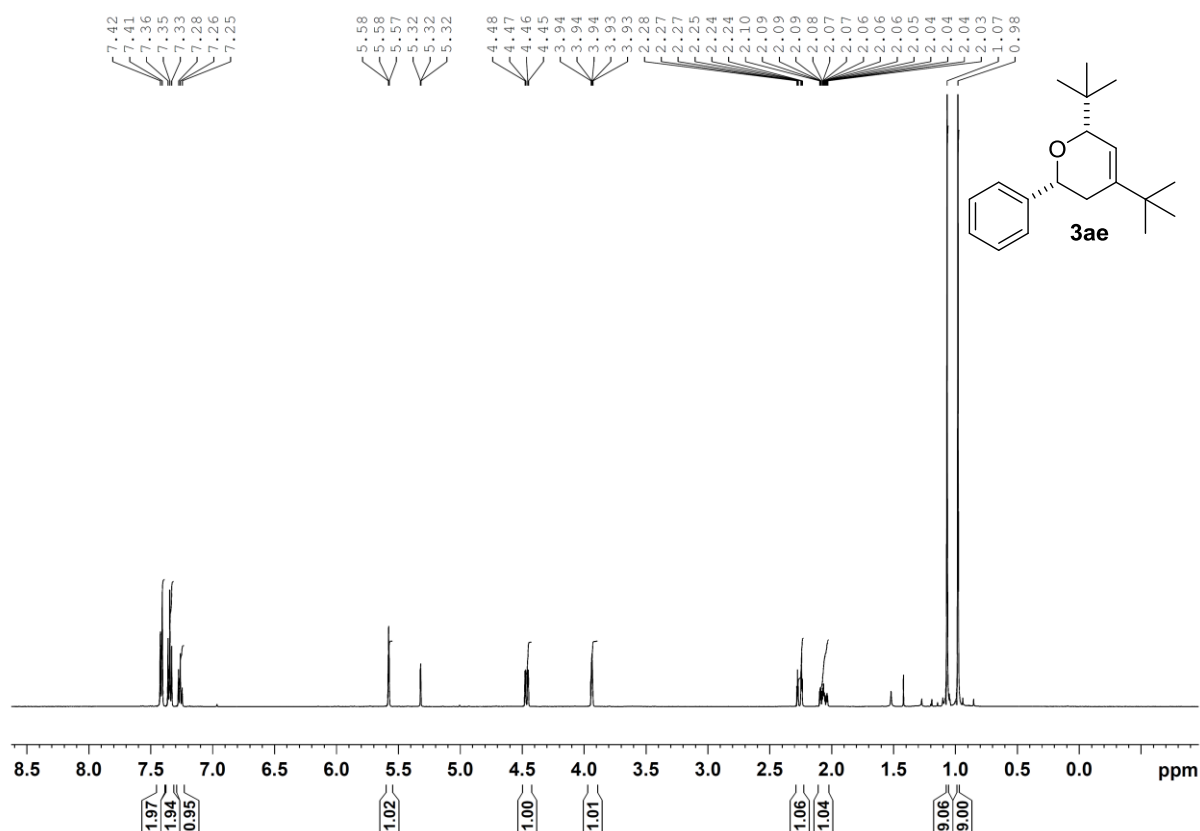

**<sup>13</sup>C NMR (3ae)**

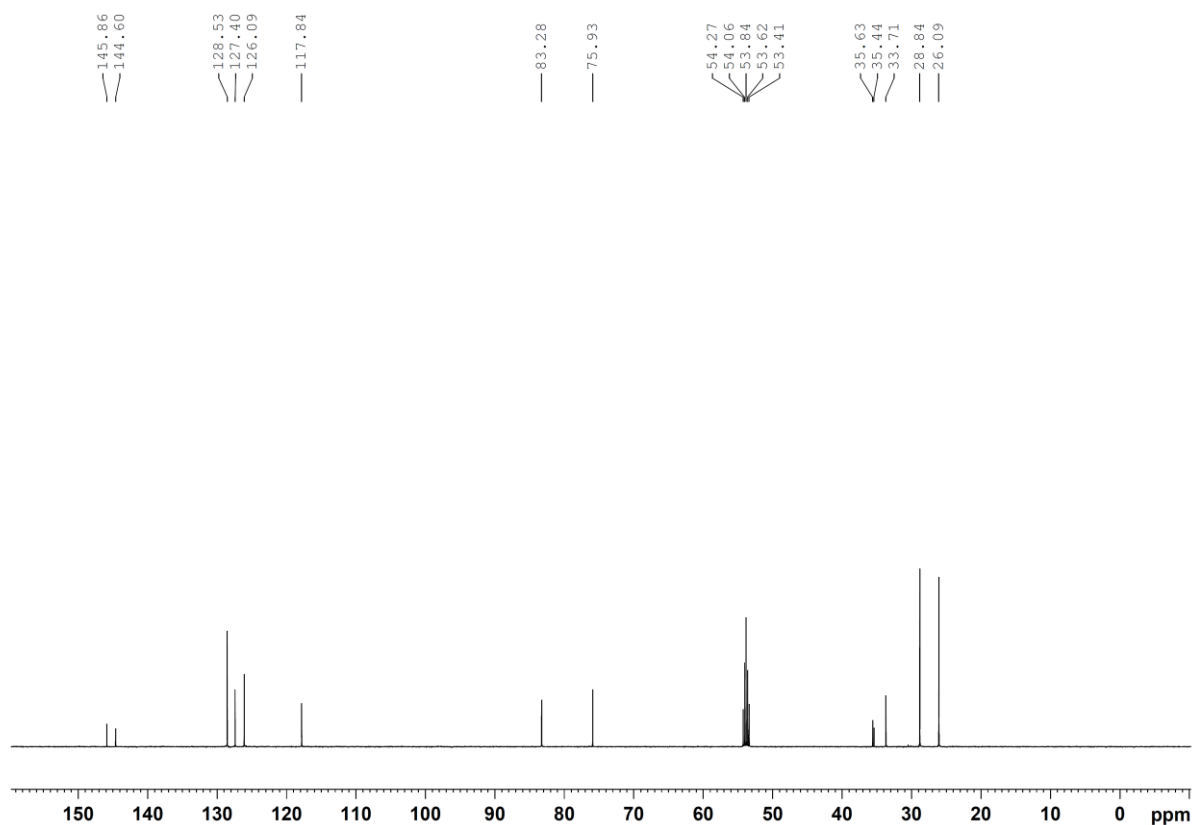

**<sup>1</sup>H NMR (3af)**

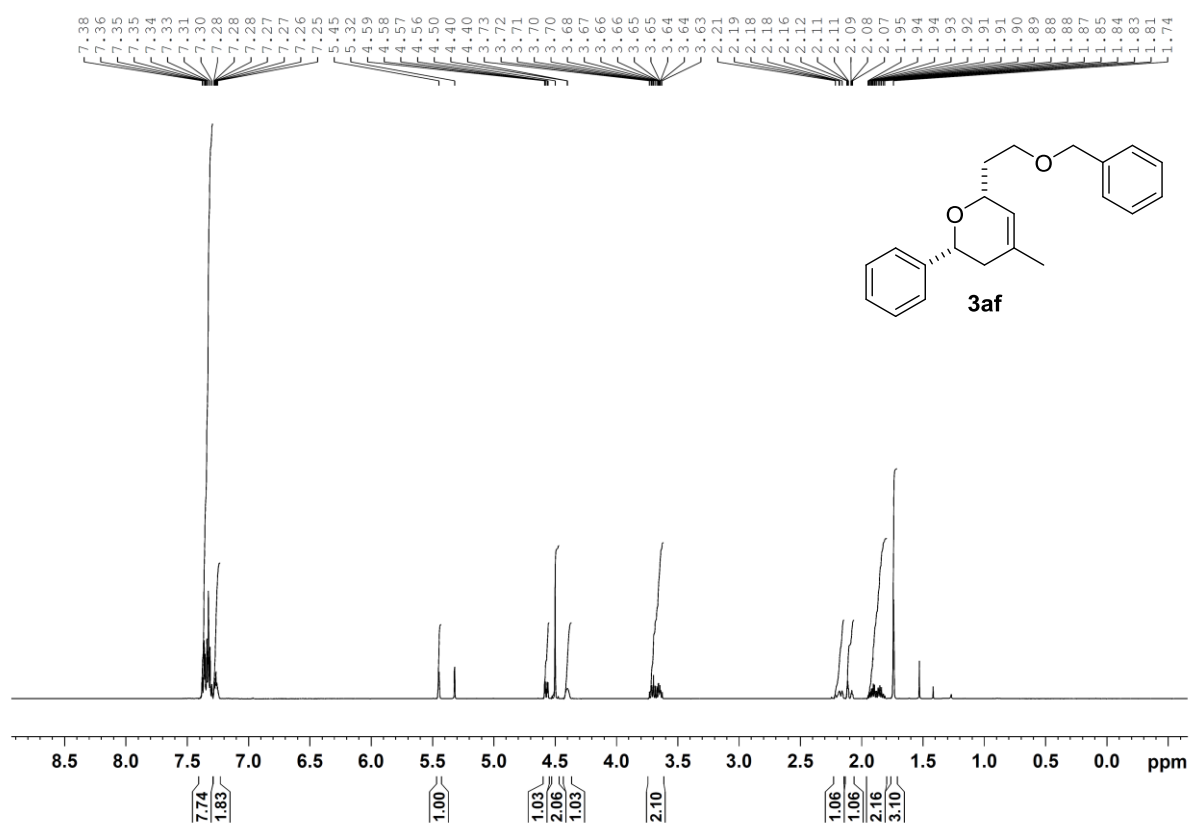

**<sup>13</sup>C NMR (3af)**

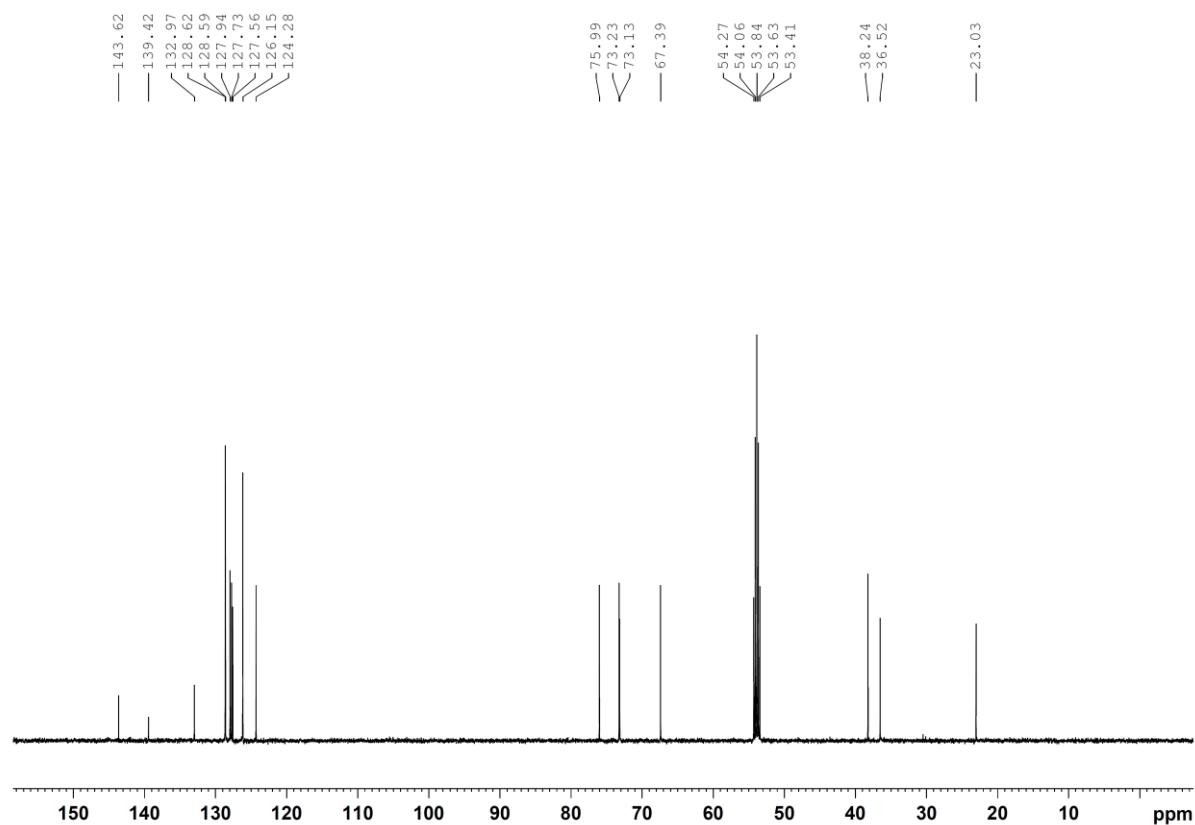

**<sup>1</sup>H NMR (5)**

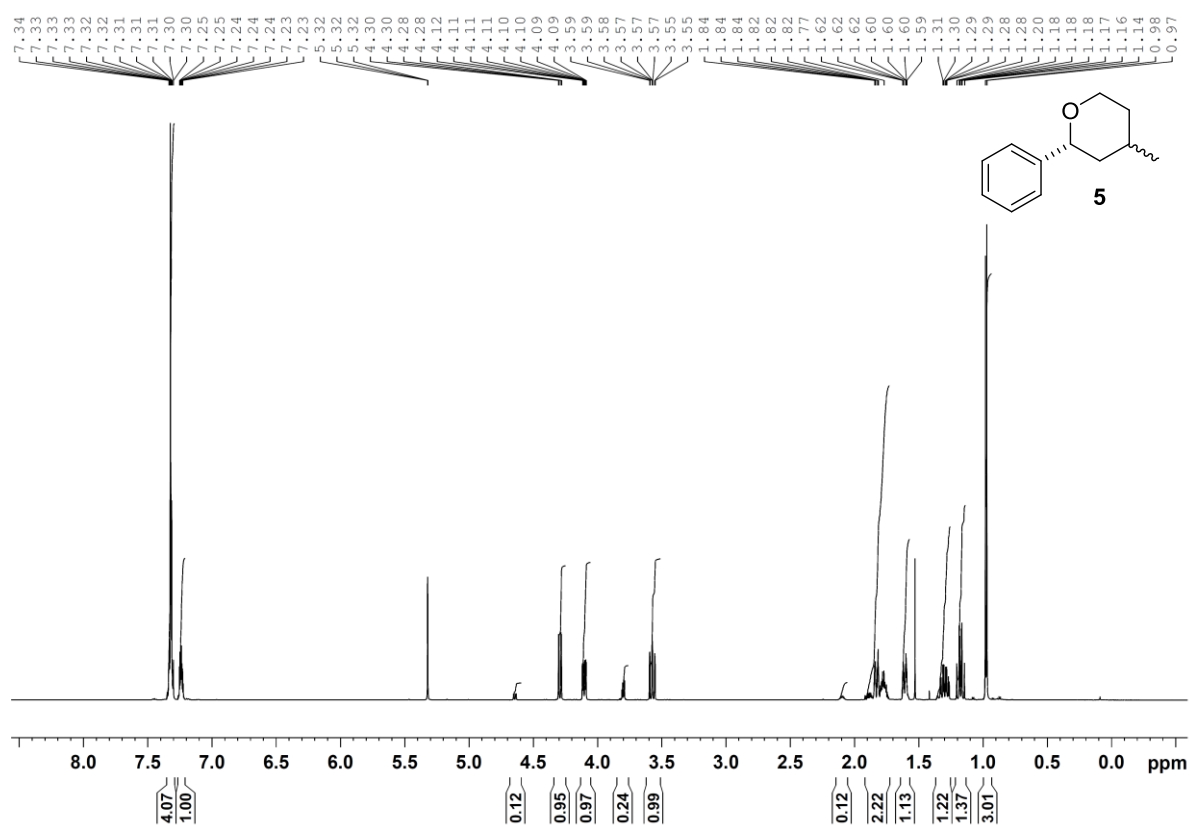

**<sup>13</sup>C NMR (5)**

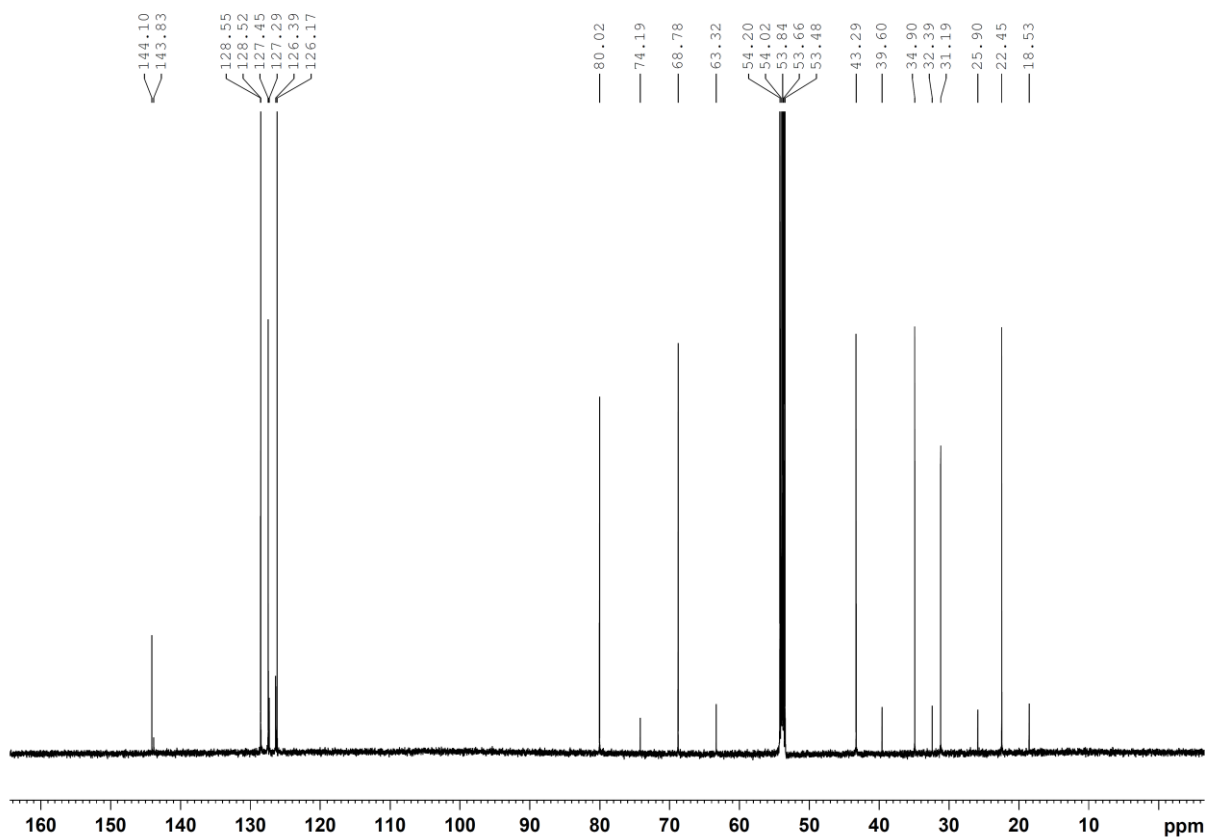

## HPLC and GC Traces

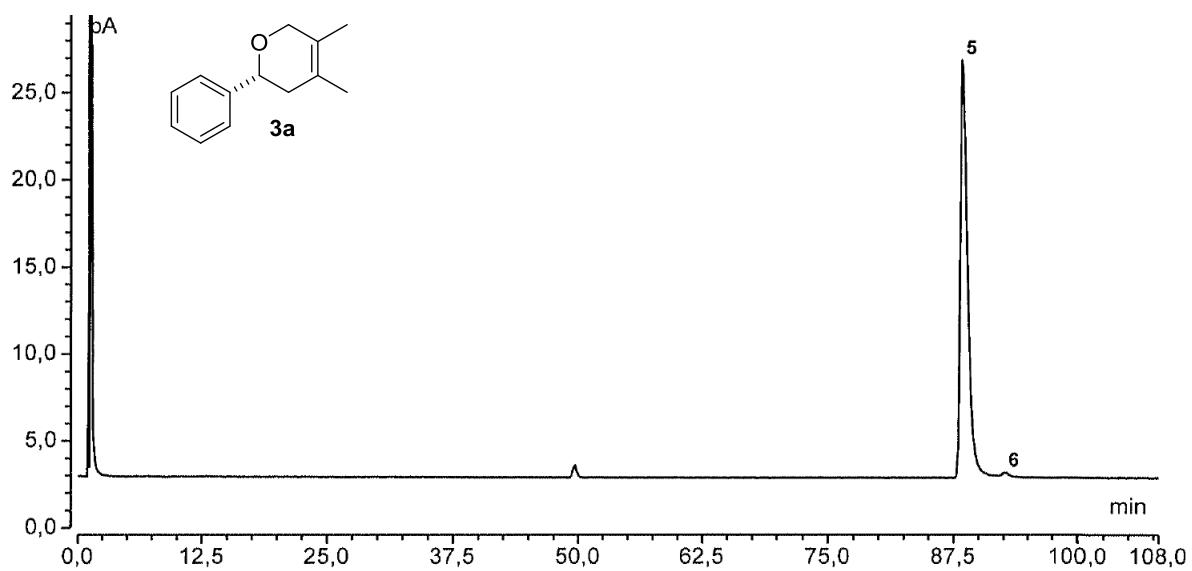

| Peak # | Ret. Time/min | Area/% |
|--------|---------------|--------|
| 5      | 88.43         | 98.34  |
| 6      | 92.67         | 1.66   |

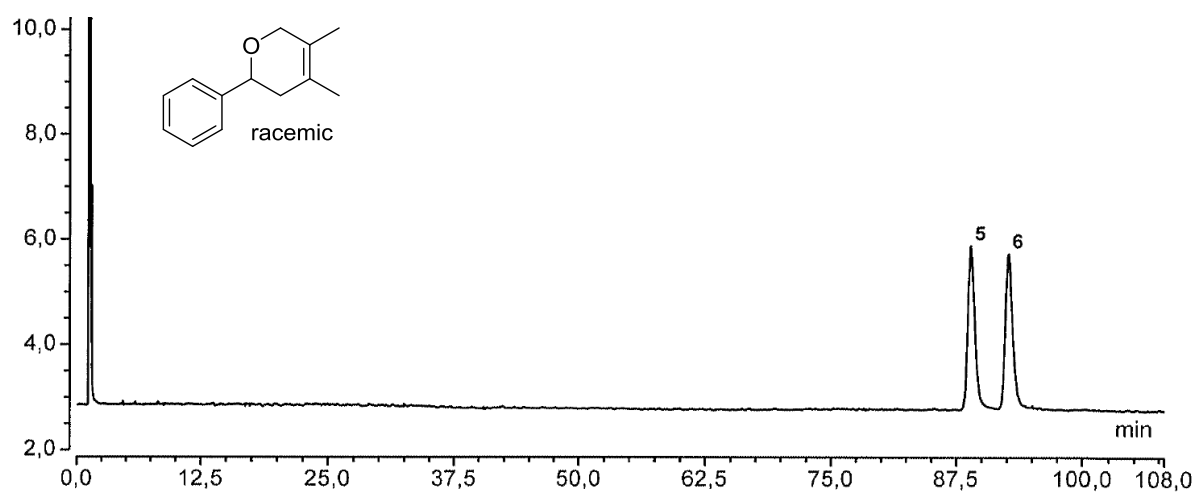

| Peak # | Ret. Time/min | Area/% |
|--------|---------------|--------|
| 5      | 88.95         | 49.98  |
| 6      | 92.68         | 50.02  |

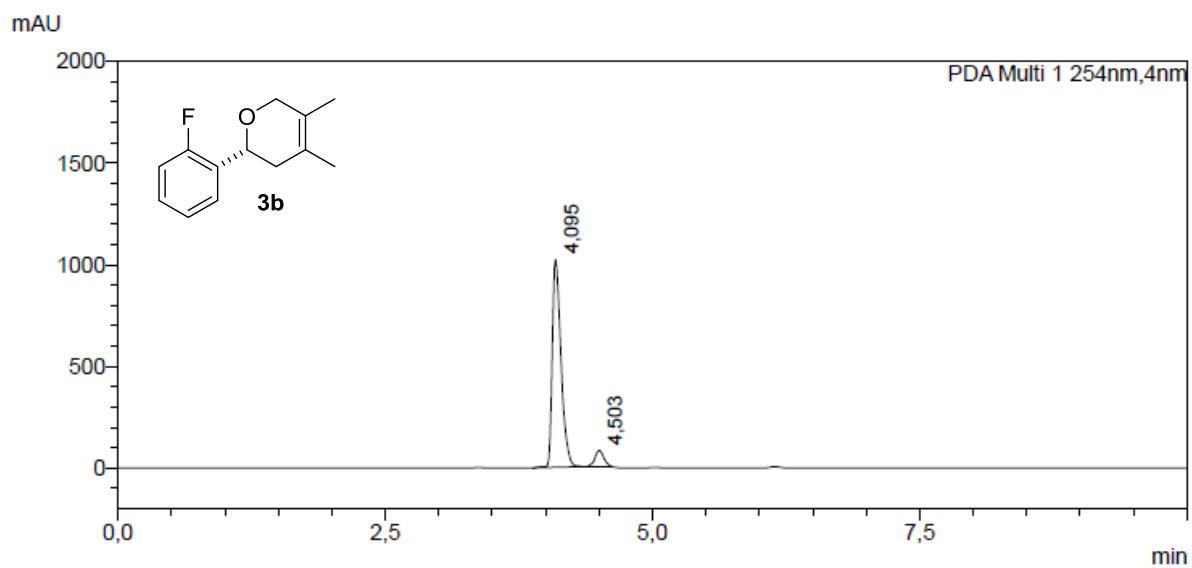

| Peak # | Ret. Time/min | Area/% |
|--------|---------------|--------|
| 1      | 4.10          | 92.34  |
| 2      | 4.50          | 7.66   |

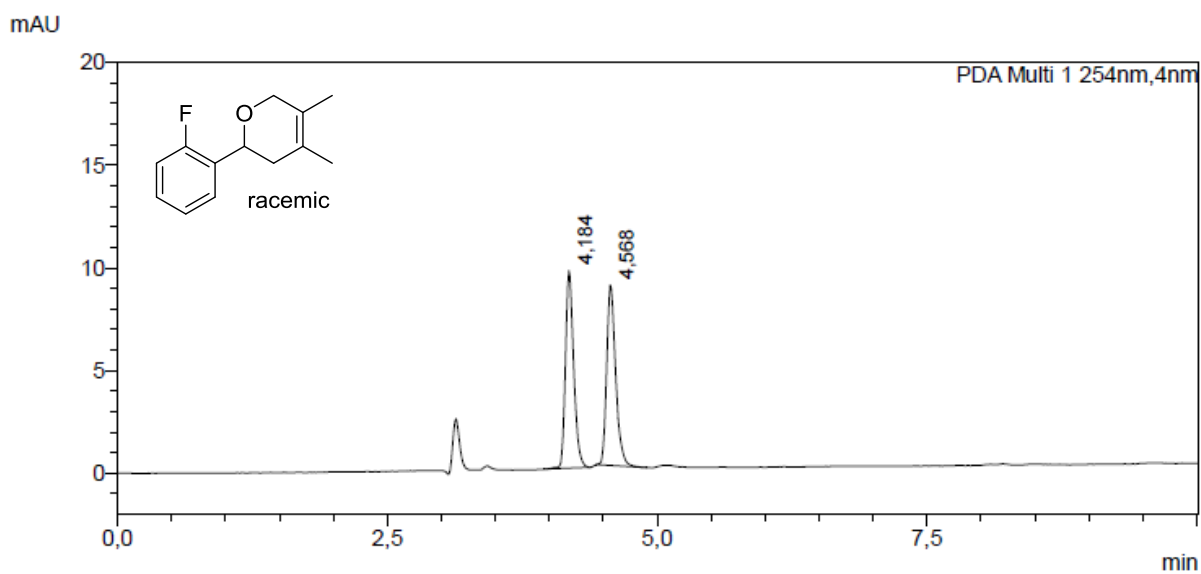

| Peak # | Ret. Time/min | Area/% |
|--------|---------------|--------|
| 1      | 4.18          | 50.01  |
| 2      | 4.57          | 49.99  |



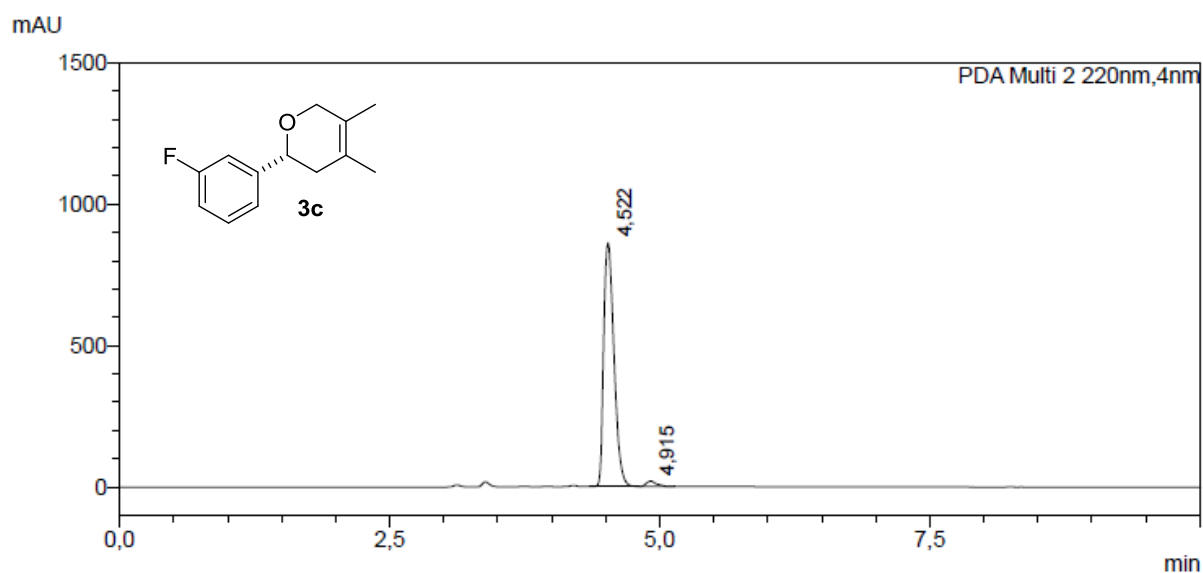

| Peak # | Ret. Time/min | Area/% |
|--------|---------------|--------|
| 1      | 4.52          | 97.86  |
| 2      | 4.92          | 2.14   |

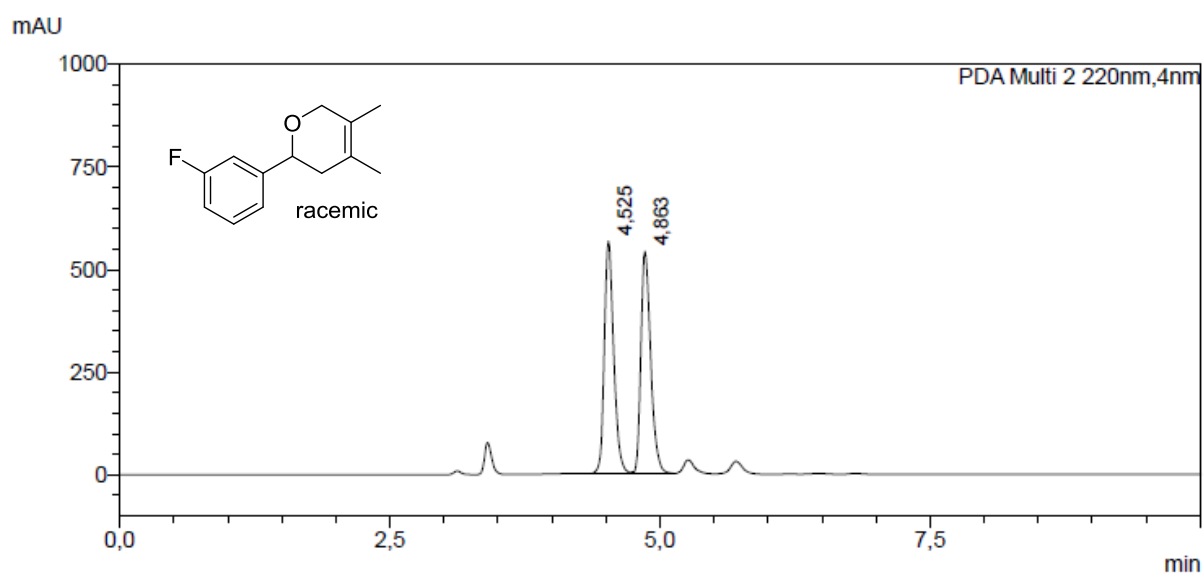

| Peak # | Ret. Time/min | Area/% |
|--------|---------------|--------|
| 1      | 4.53          | 50.21  |
| 2      | 4.86          | 49.79  |

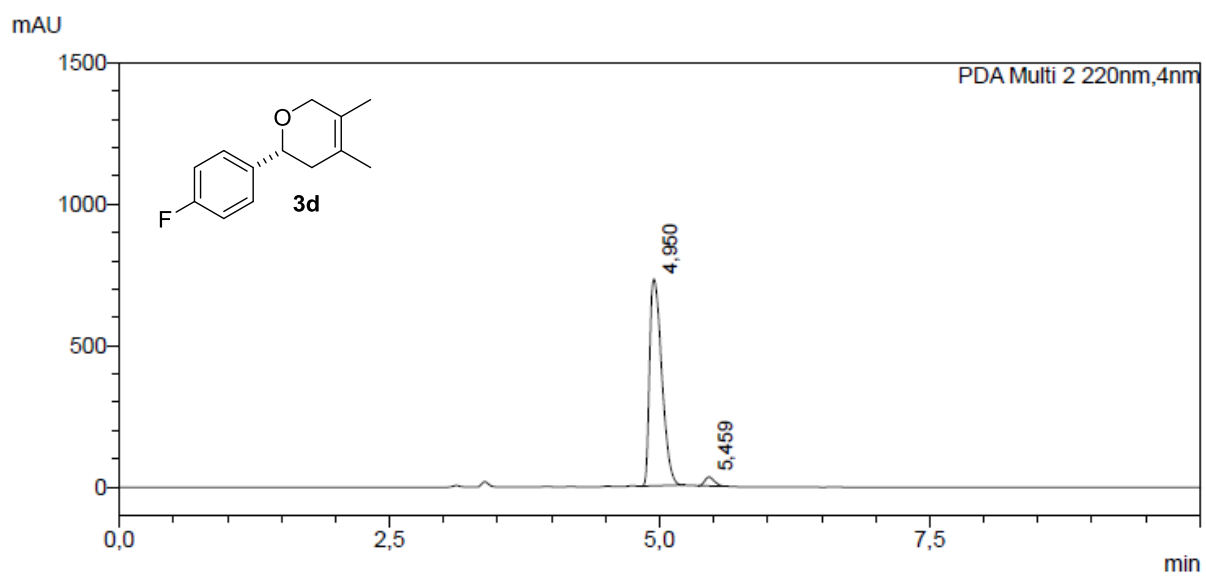

| Peak # | Ret. Time/min | Area/% |
|--------|---------------|--------|
| 1      | 4.95          | 96.84  |
| 2      | 5.46          | 3.16   |

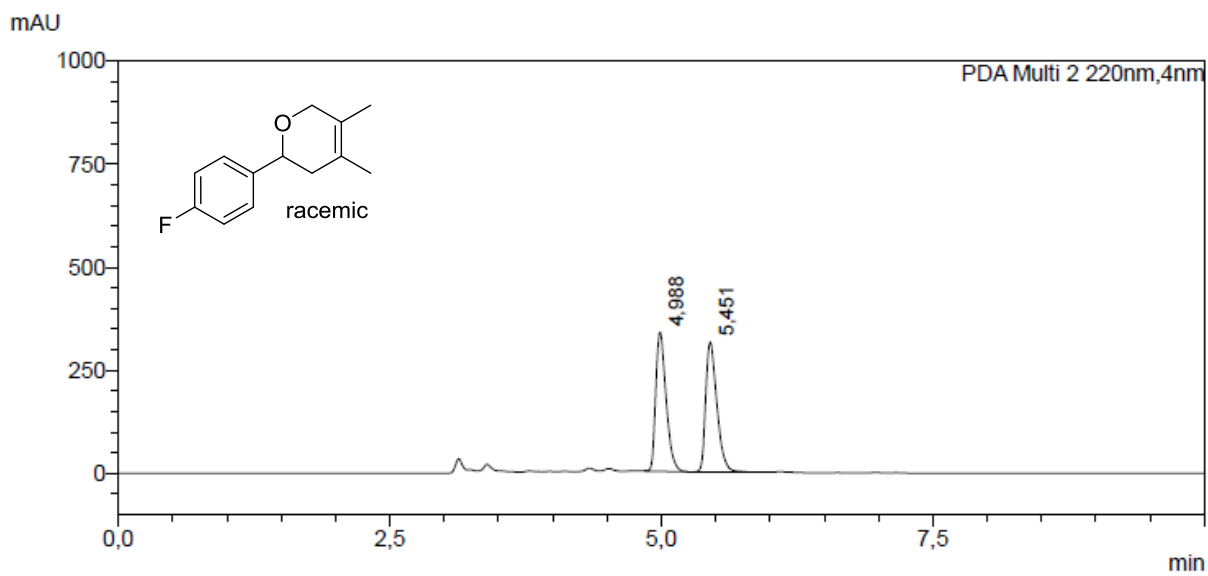

| Peak # | Ret. Time/min | Area/% |
|--------|---------------|--------|
| 1      | 4.99          | 49.63  |
| 2      | 5.45          | 50.37  |

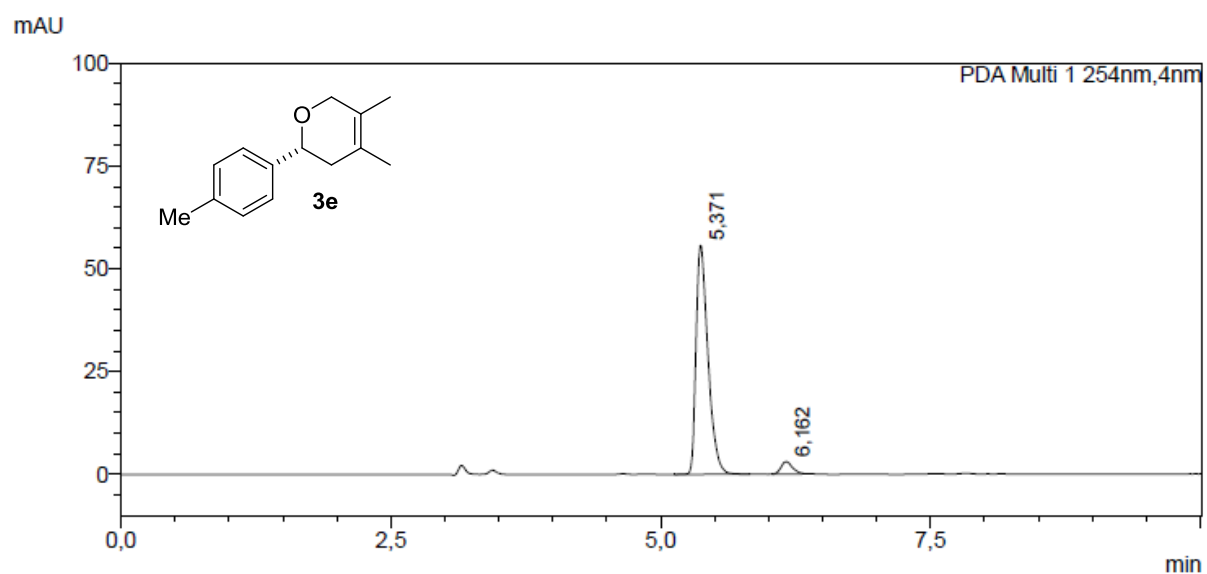

| Peak # | Ret. Time/min | Area/% |
|--------|---------------|--------|
| 1      | 5.37          | 95.01  |
| 2      | 6.16          | 4.99   |

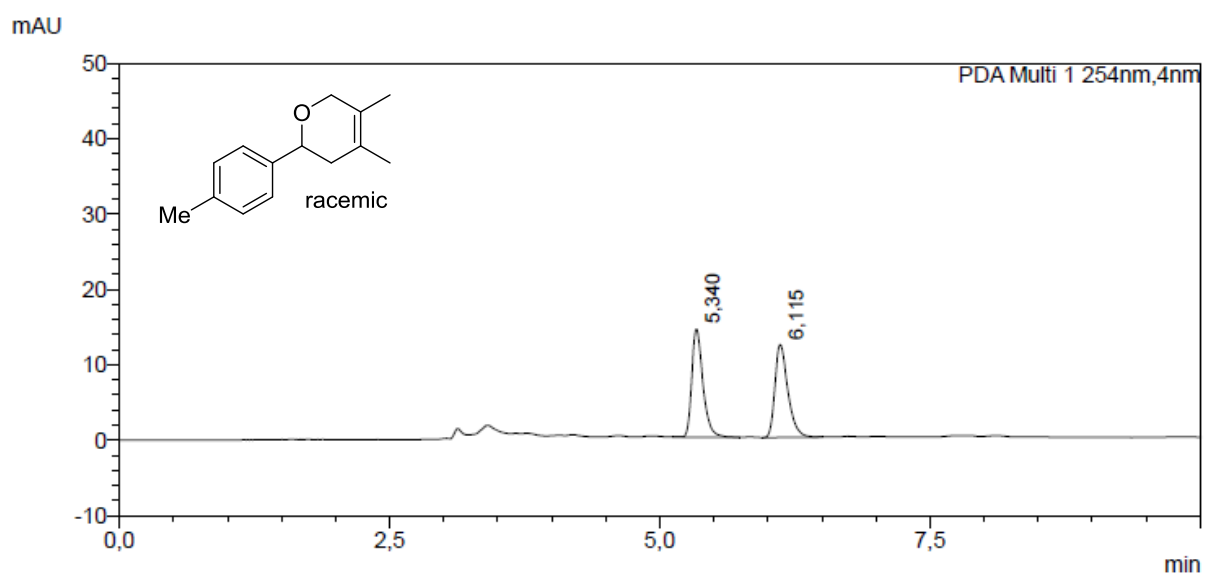

| Peak # | Ret. Time/min | Area/% |
|--------|---------------|--------|
| 1      | 5.34          | 50.10  |
| 2      | 6.12          | 49.90  |

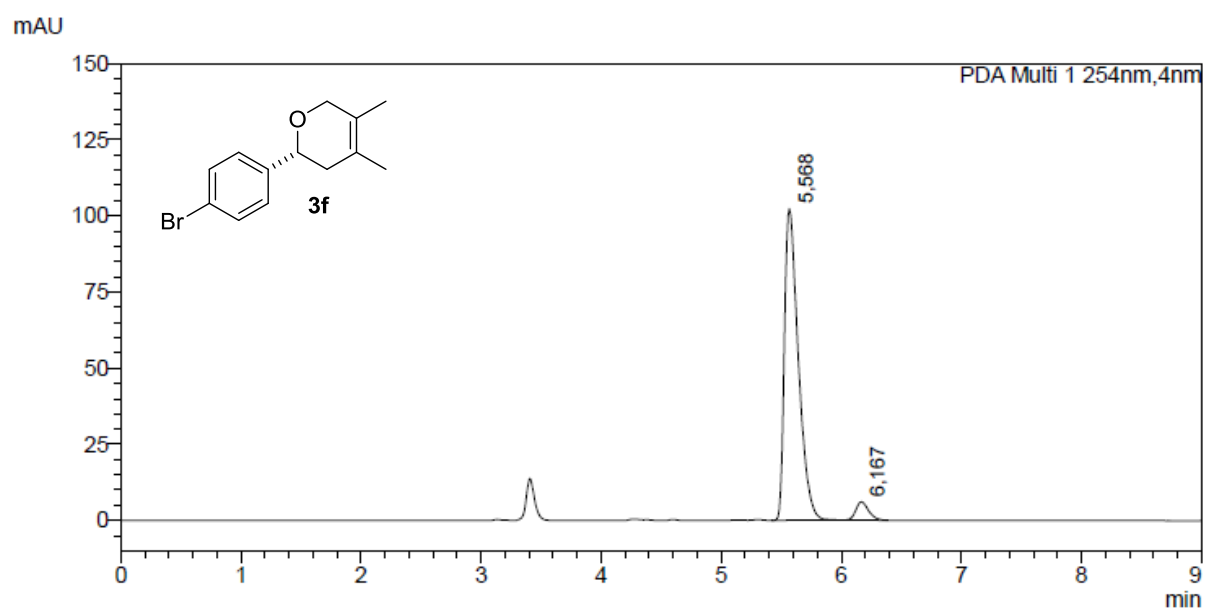

| Peak # | Ret. Time/min | Area/% |
|--------|---------------|--------|
| 1      | 5.57          | 94.97  |
| 2      | 6.17          | 5.03   |

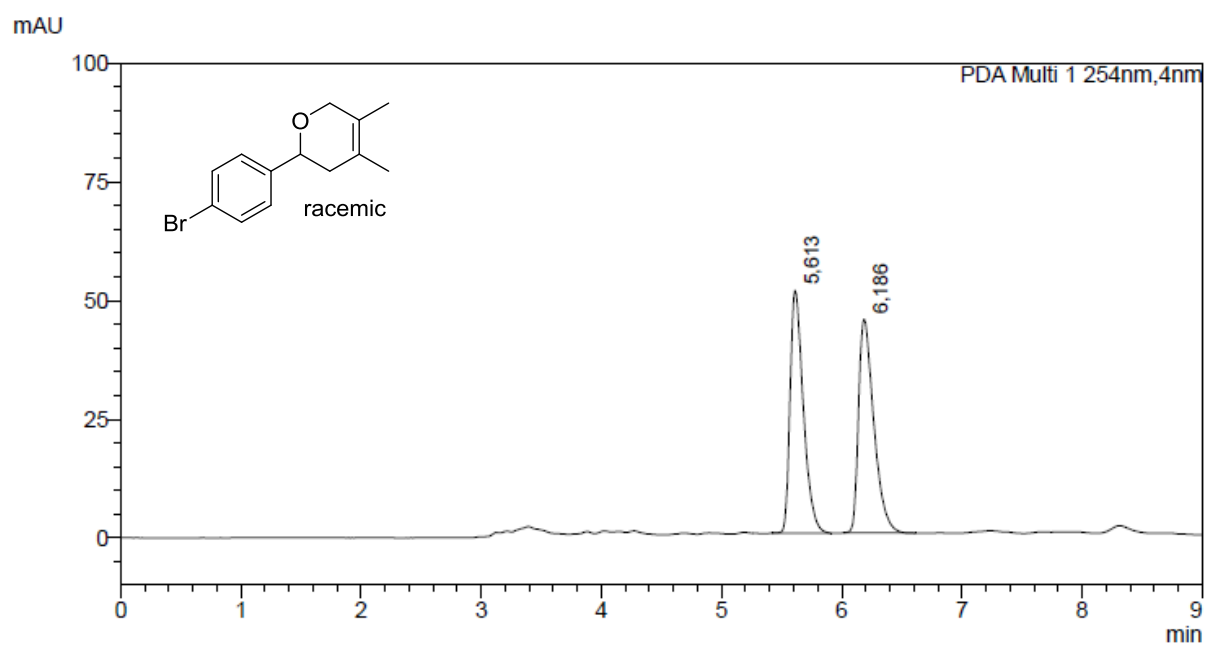

| Peak # | Ret. Time/min | Area/% |
|--------|---------------|--------|
| 1      | 5.61          | 49.66  |
| 2      | 6.19          | 50.34  |

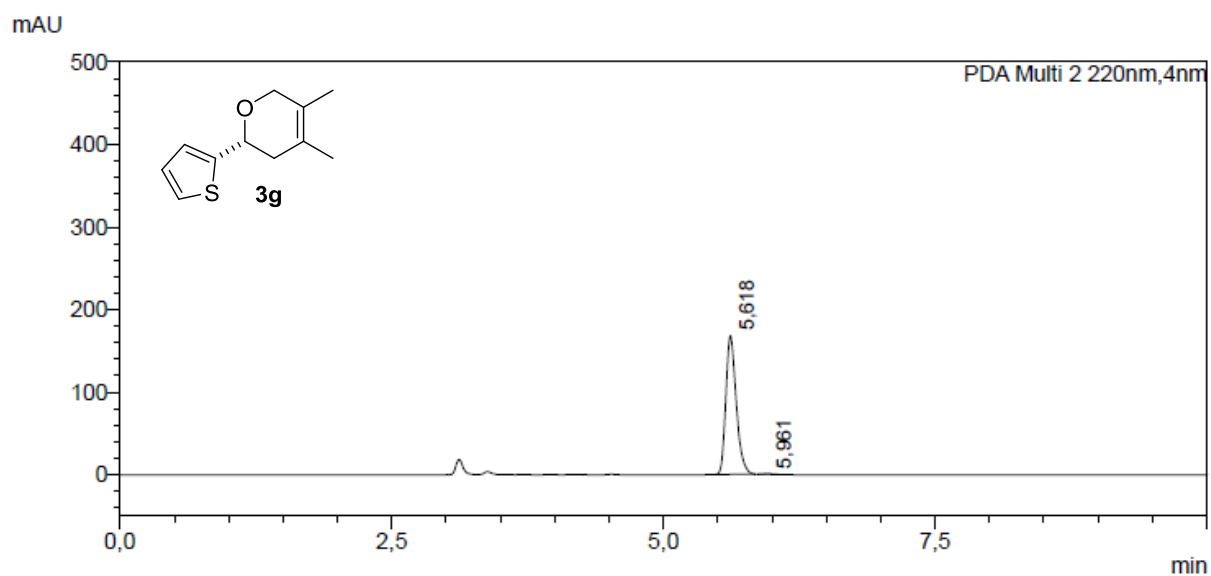

| Peak # | Ret. Time/min | Area/% |
|--------|---------------|--------|
| 1      | 5.52          | 99.74  |
| 2      | 5.96          | 0.26   |

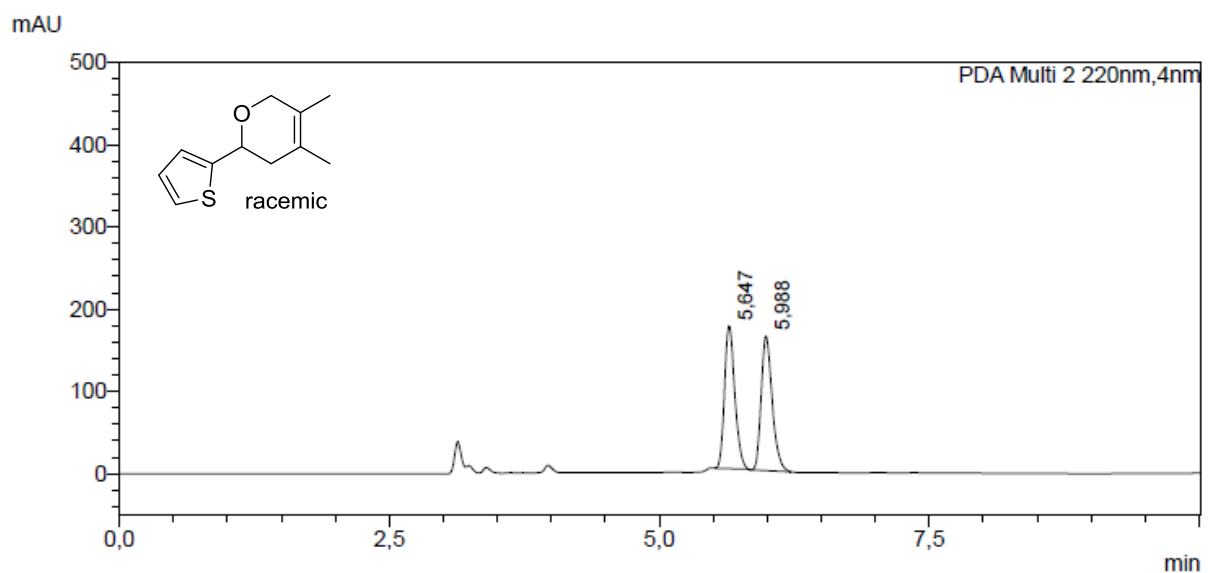

| Peak # | Ret. Time/min | Area/% |
|--------|---------------|--------|
| 1      | 5.65          | 49.77  |
| 2      | 5.99          | 50.23  |

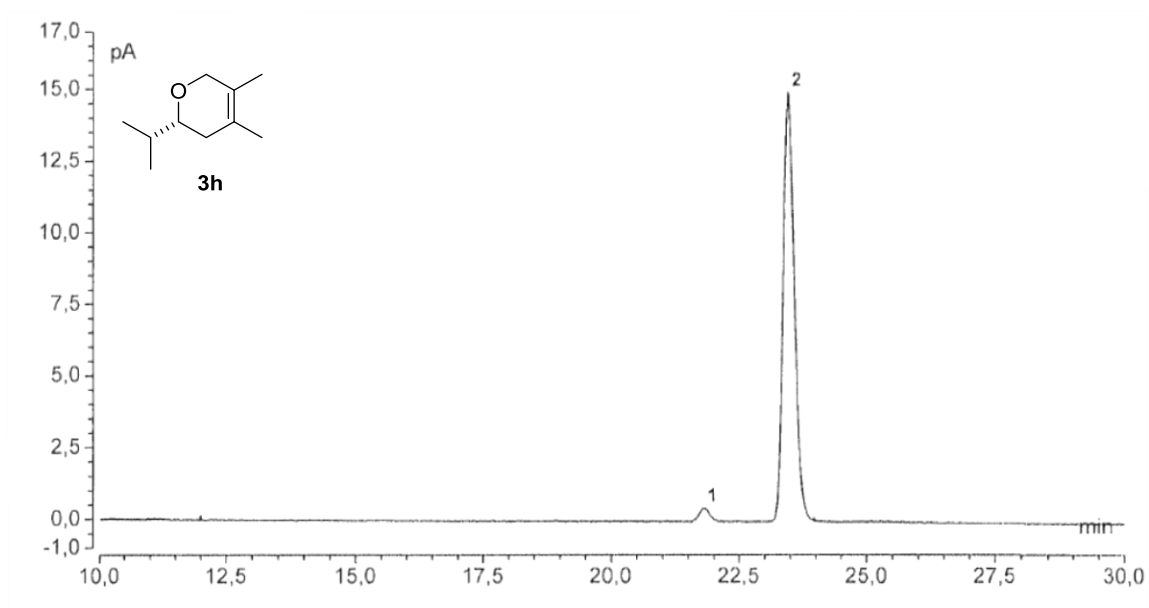

| Peak # | Ret. Time/min | Area/% |
|--------|---------------|--------|
| 1      | 21.81         | 2.64   |
| 2      | 23.46         | 97.36  |

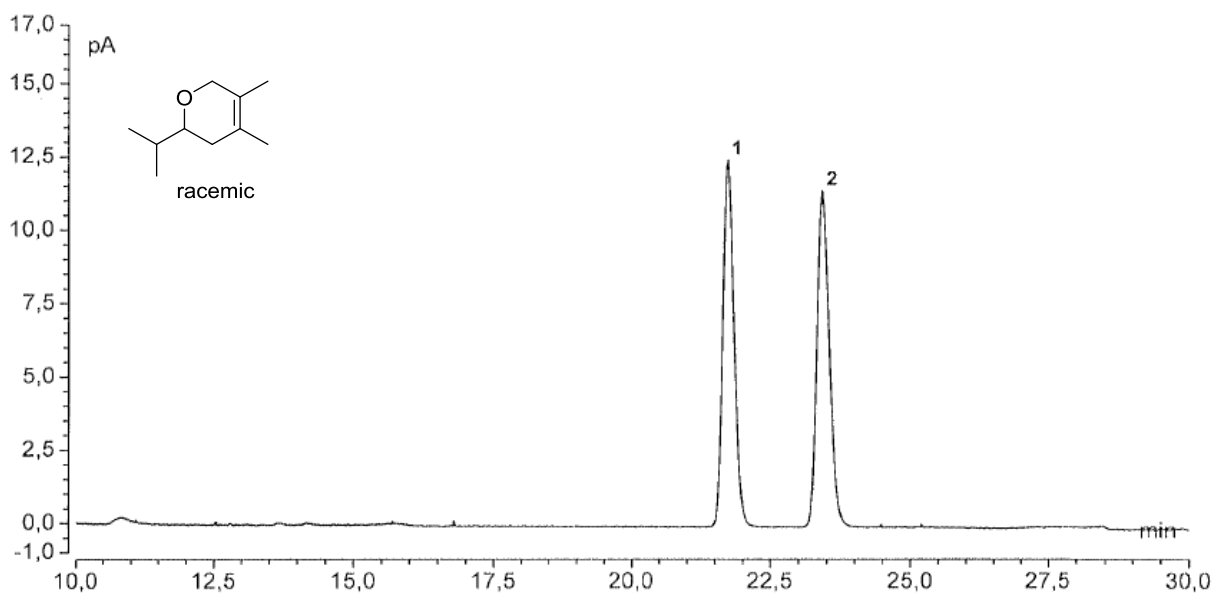

| Peak # | Ret. Time/min | Area/% |
|--------|---------------|--------|
| 1      | 21.75         | 50.11  |
| 2      | 23.43         | 49.89  |

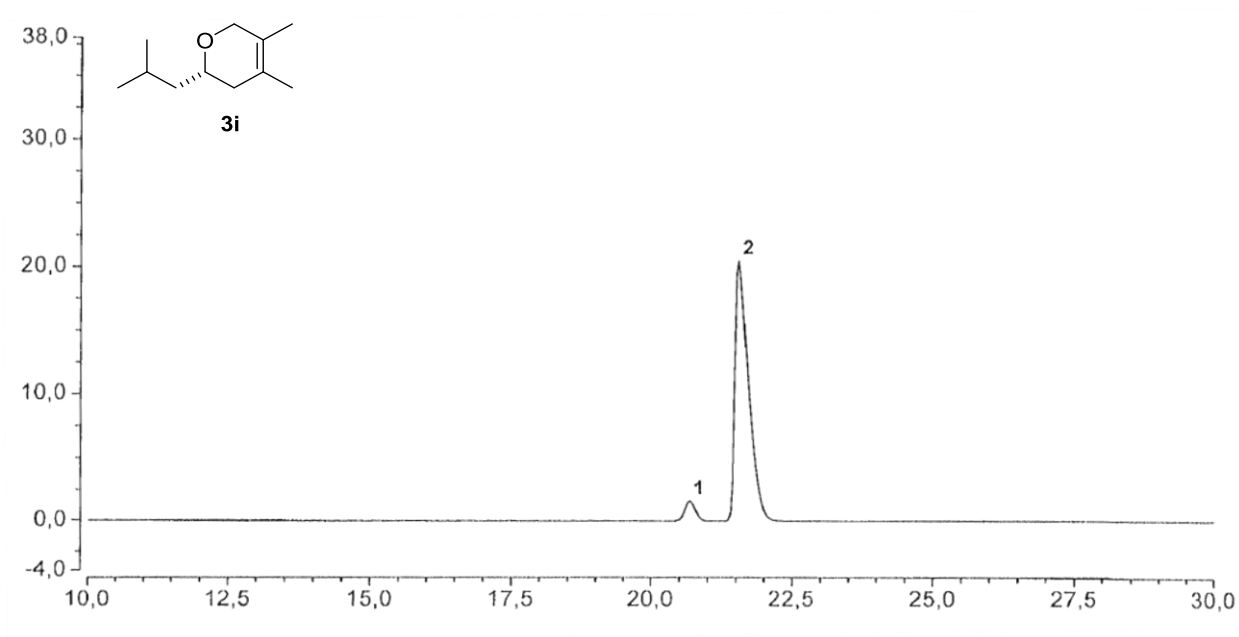

| Peak # | Ret. Time/min | Area/% |
|--------|---------------|--------|
| 1      | 20.68         | 5.55   |
| 2      | 21.55         | 94.45  |

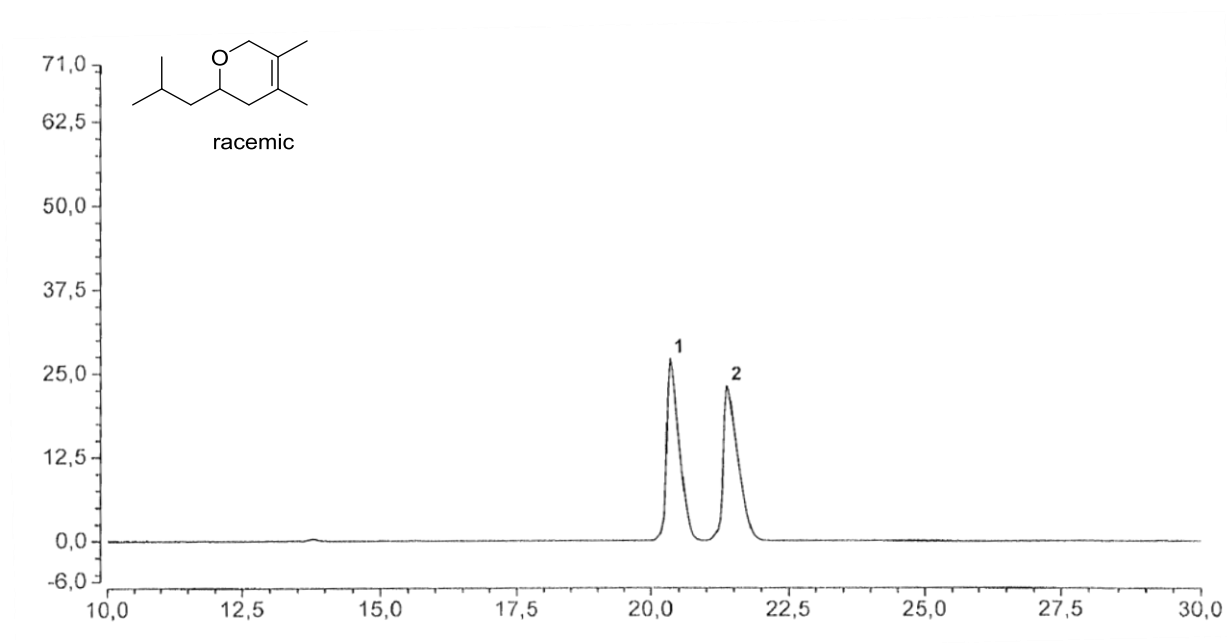

| Peak # | Ret. Time/min | Area/% |
|--------|---------------|--------|
| 1      | 20.34         | 50.04  |
| 2      | 21.38         | 49.96  |

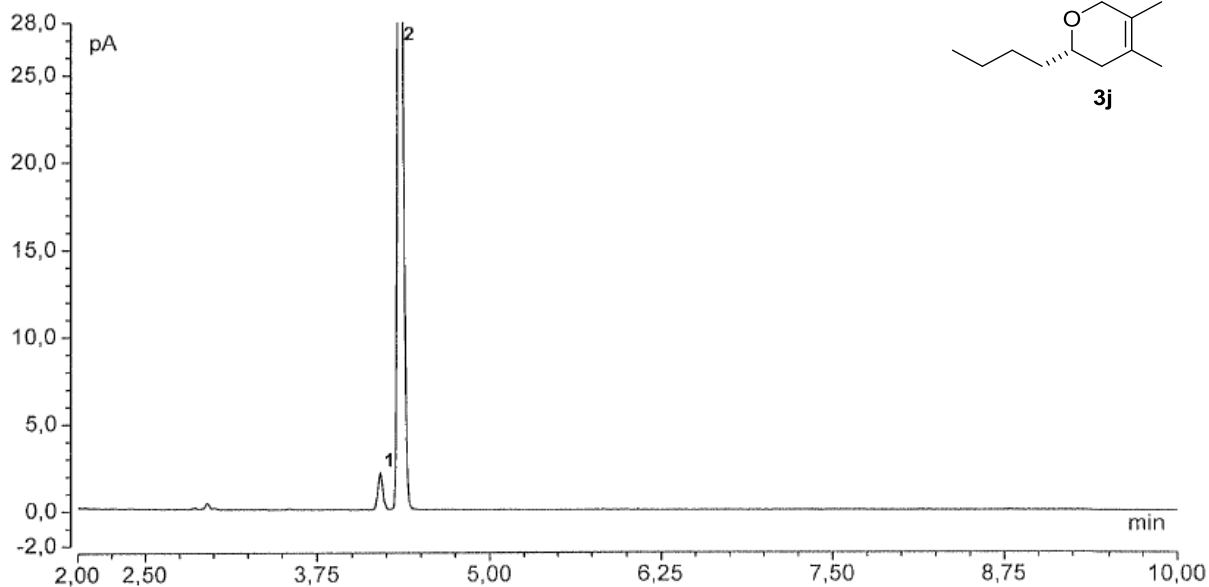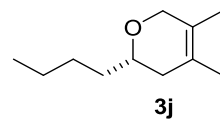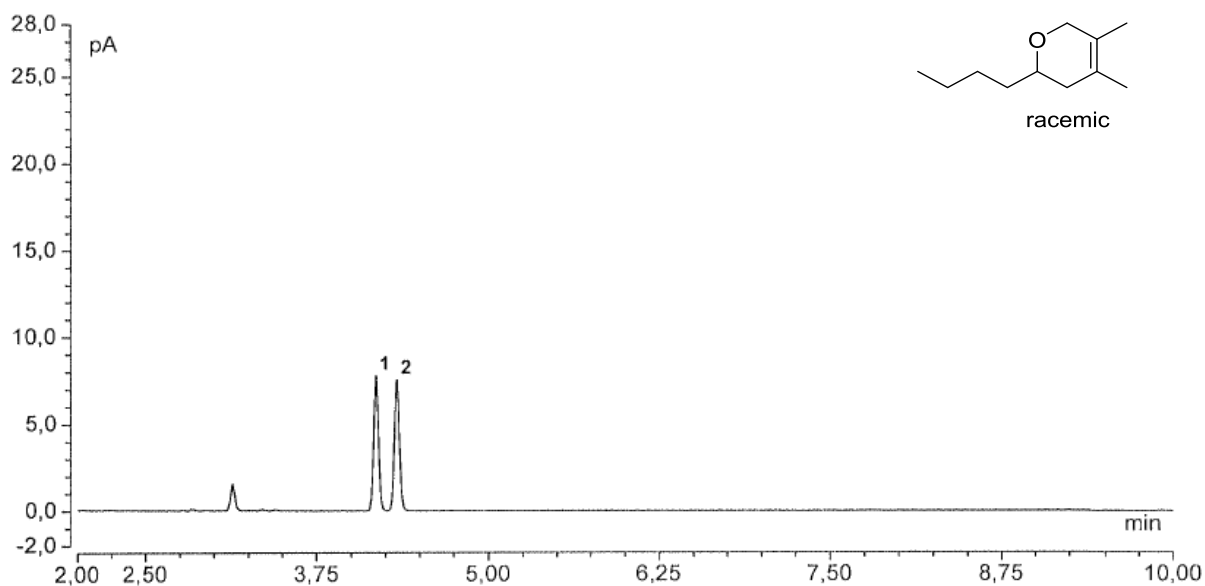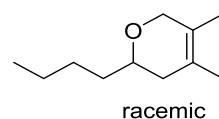



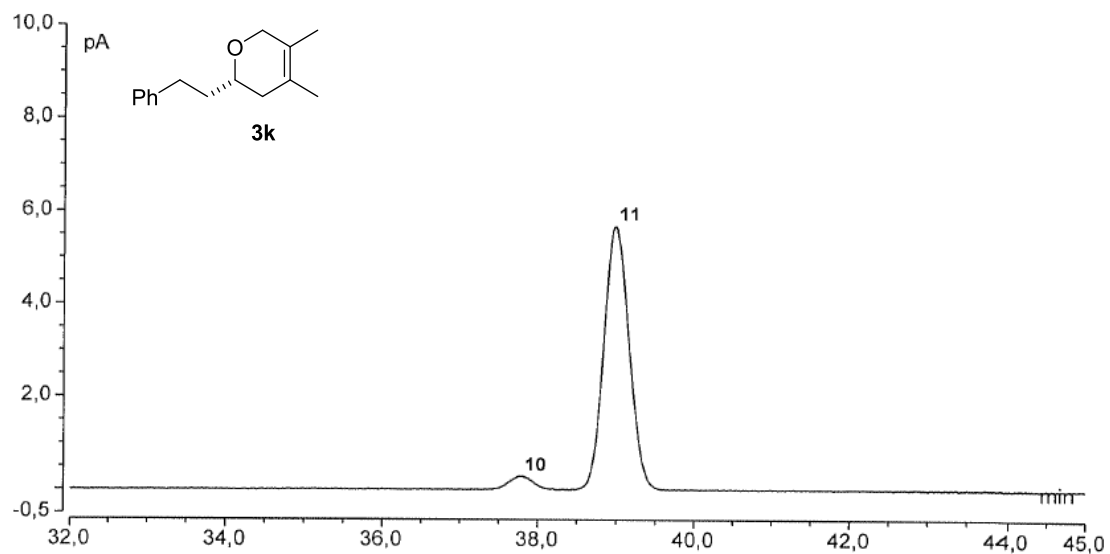

| Peak # | Ret. Time/min | Area/% |
|--------|---------------|--------|
| 10     | 37.79         | 4.49   |
| 11     | 38.98         | 95.51  |

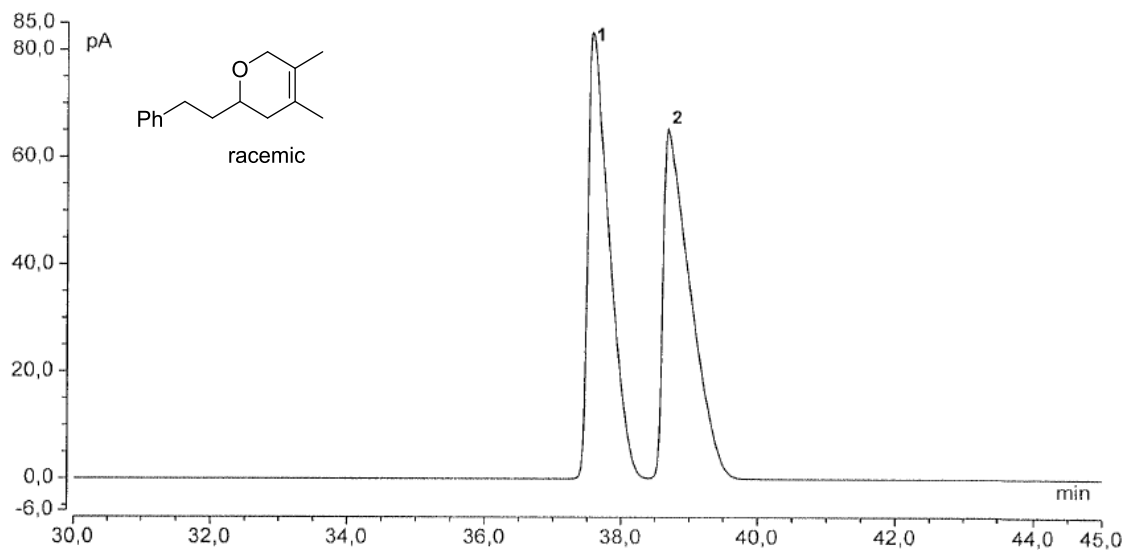

| Peak # | Ret. Time/min | Area/% |
|--------|---------------|--------|
| 1      | 37.59         | 50.04  |
| 2      | 38.69         | 49.96  |

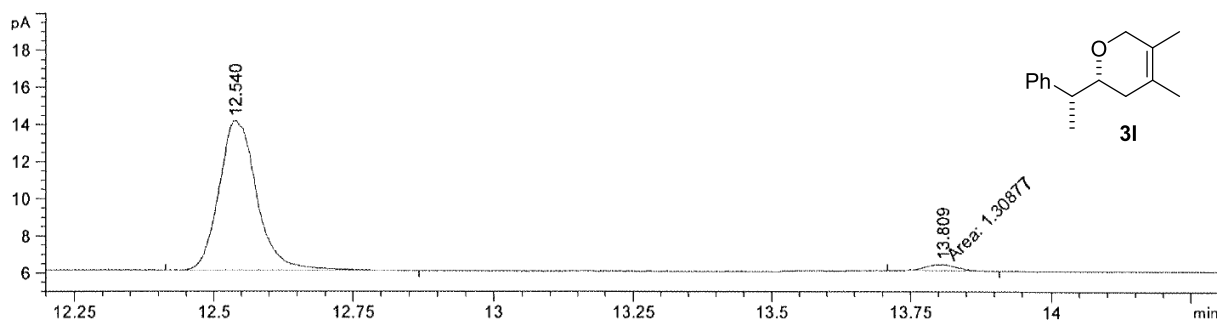

| Peak # | Ret. Time/min | Area/%  |
|--------|---------------|---------|
| 1      | 12.54         | 96.7016 |
| 4      | 13.81         | 3.2984  |

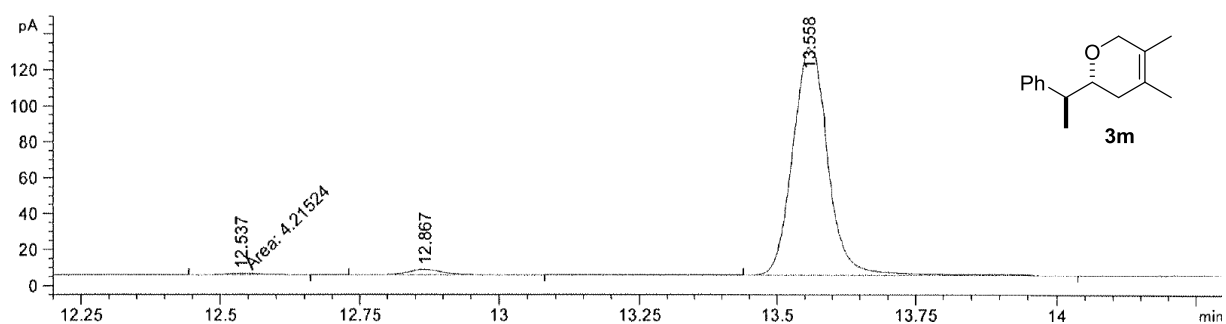

| Peak # | Ret. Time/min | Area/%  |
|--------|---------------|---------|
| 1      | 12.54         | 0.7309  |
| 2      | 12.87         | 2.4147  |
| 3      | 13.56         | 96.8544 |

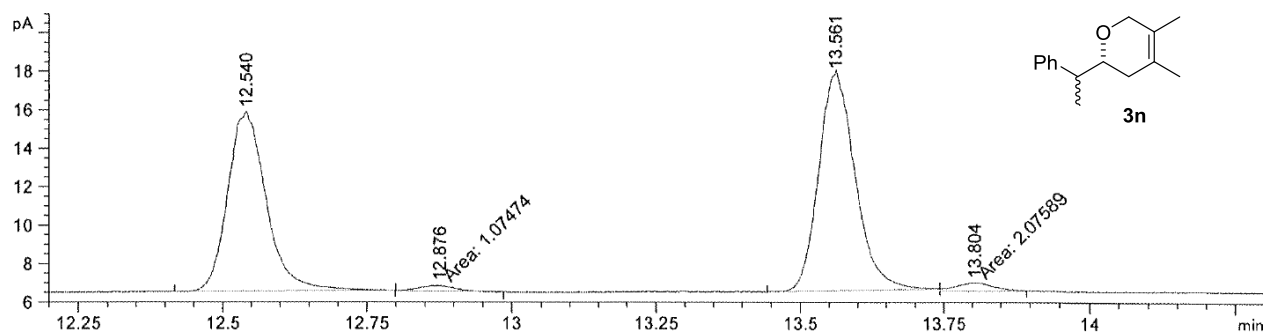

| Peak # | Ret. Time/min | Area/%  |
|--------|---------------|---------|
| 1      | 12.54         | 44.9979 |
| 2      | 12.88         | 1.1056  |
| 3      | 13.56         | 51.7611 |
| 4      | 13.80         | 2.1354  |

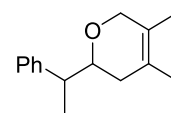

mixture of all stereoisomers

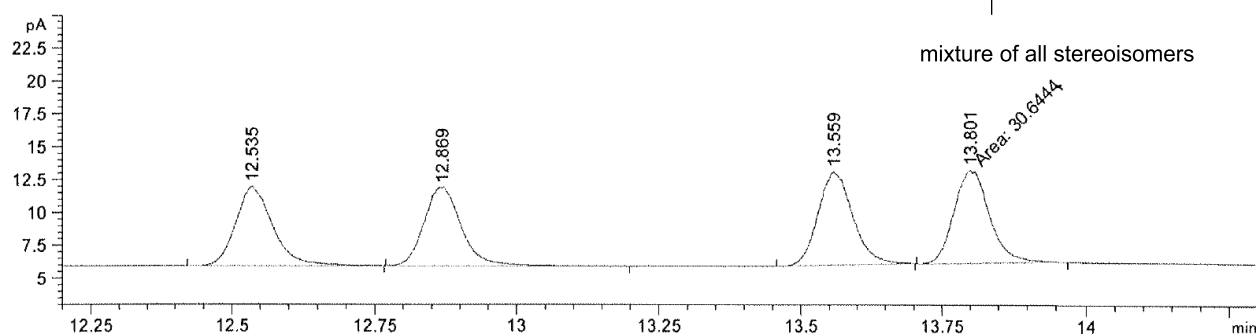

| Peak # | Ret. Time/min | Area/%  |
|--------|---------------|---------|
| 1      | 12.54         | 23.5496 |
| 2      | 12.87         | 23.6841 |
| 3      | 13.56         | 26.3370 |
| 4      | 13.80         | 26.4293 |

Catalyst

Aldehyde

Chiral GC spectra

TfOH

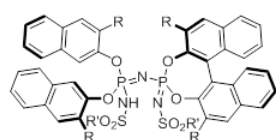

4d: R = 3,5-( $\text{OC}_3\text{F}_7$ ) $_2\text{C}_6\text{H}_3$ , R' =  $\text{CF}_3$

4d

4d

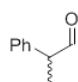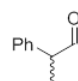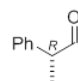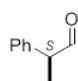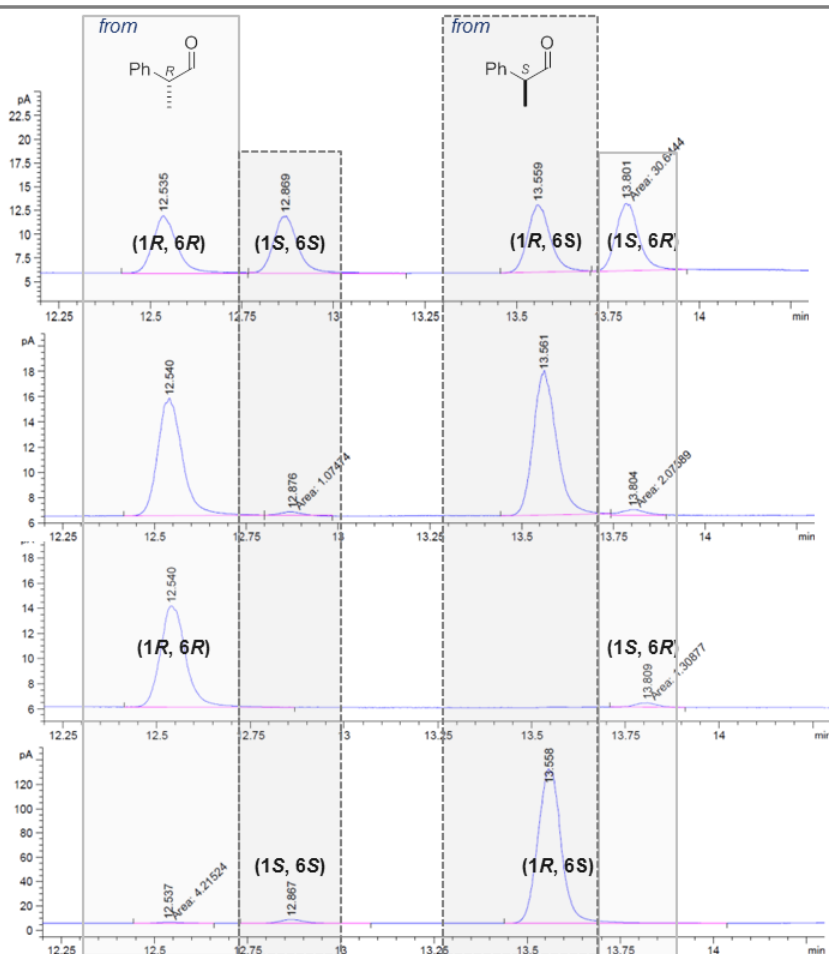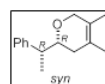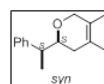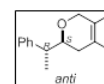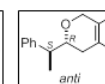

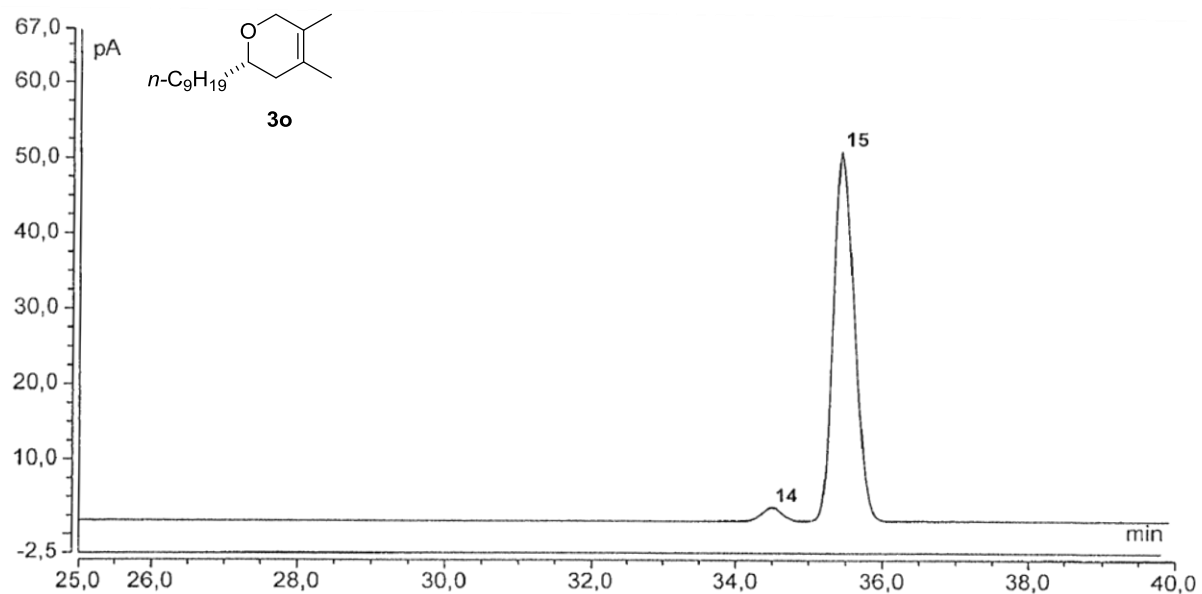

| Peak # | Ret. Time/min | Area/% |
|--------|---------------|--------|
| 14     | 34.49         | 3.47   |
| 15     | 35.43         | 96.53  |

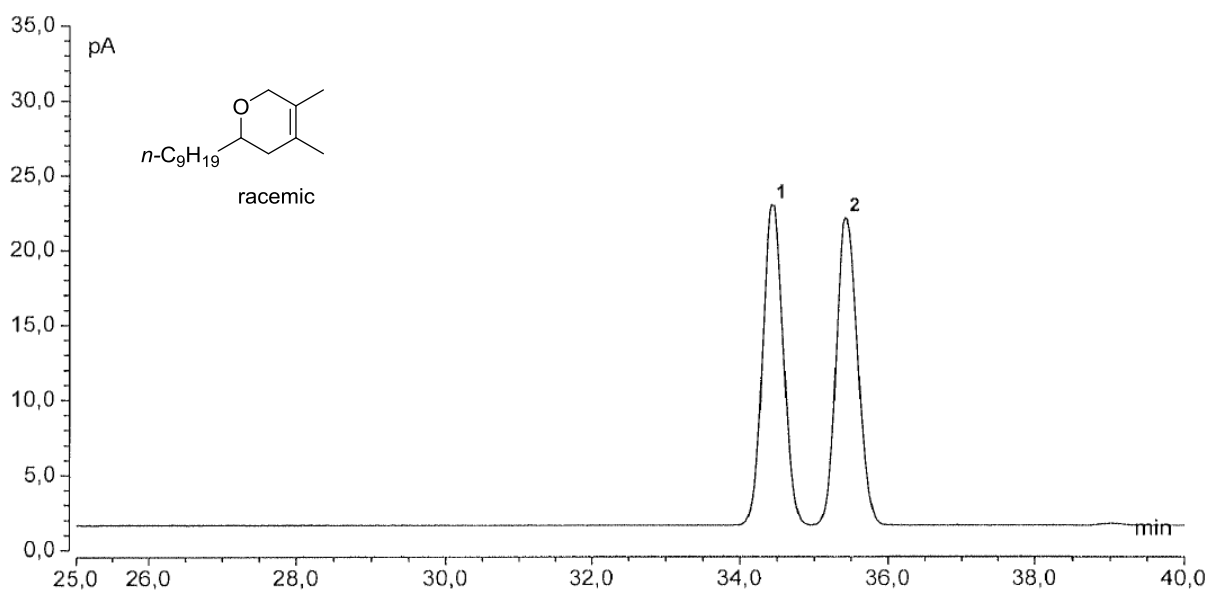

| Peak # | Ret. Time/min | Area/% |
|--------|---------------|--------|
| 1      | 34.45         | 49.98  |
| 2      | 35.43         | 50.02  |

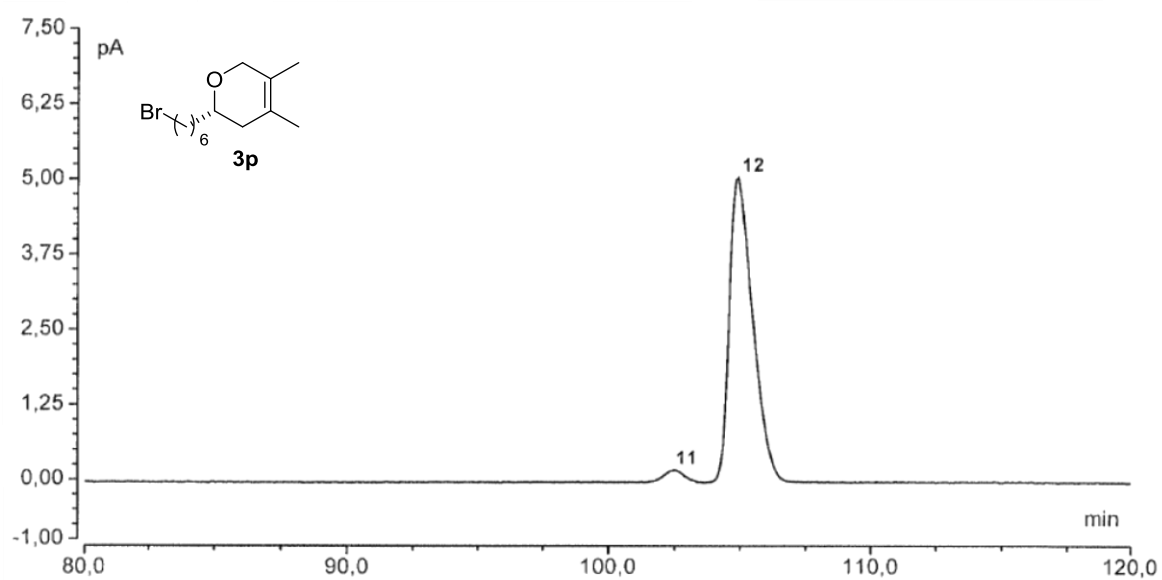

| Peak # | Ret. Time/min | Area/% |
|--------|---------------|--------|
| 11     | 102.41        | 3.56   |
| 12     | 104.94        | 96.44  |

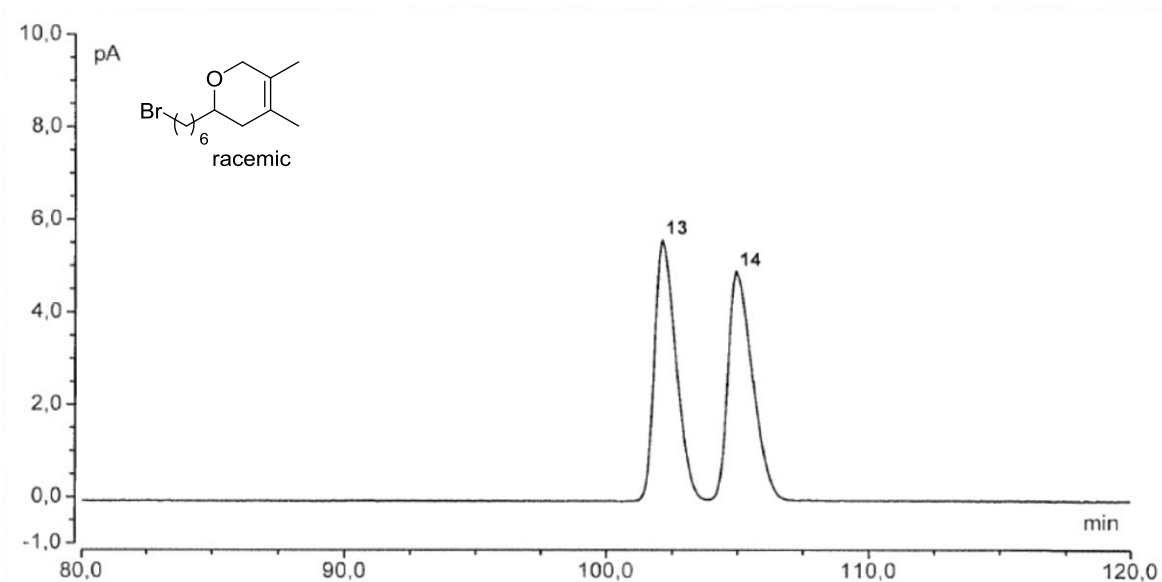

| Peak # | Ret. Time/min | Area/% |
|--------|---------------|--------|
| 13     | 102.11        | 49.93  |
| 14     | 104.93        | 50.07  |

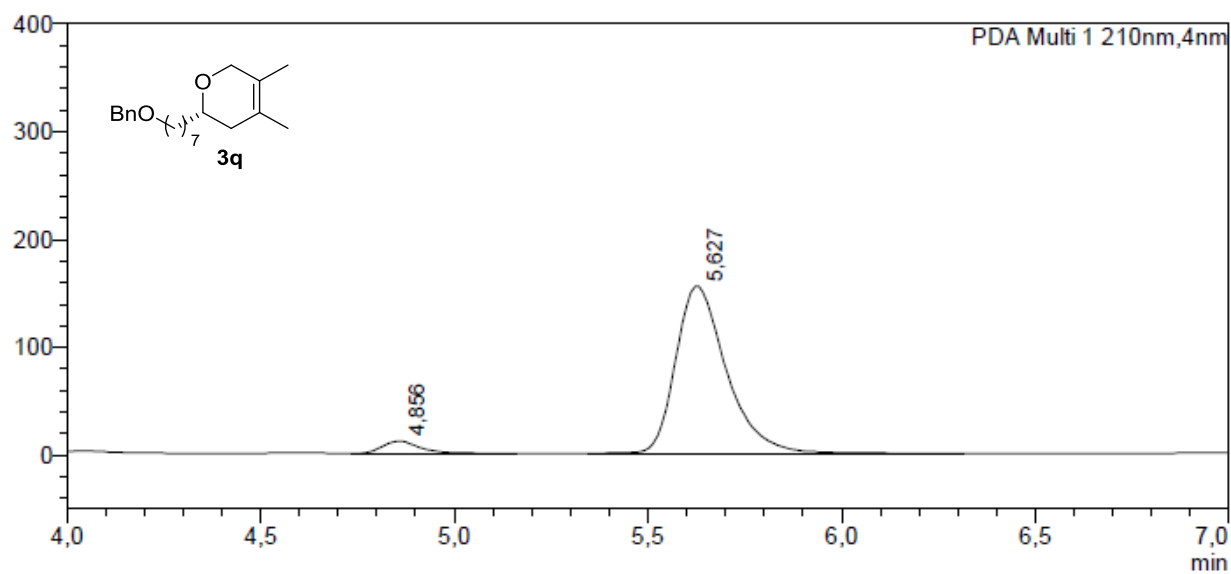

| Peak # | Ret. Time/min | Area/% |
|--------|---------------|--------|
| 1      | 4.86          | 5.22   |
| 2      | 5.63          | 94.78  |

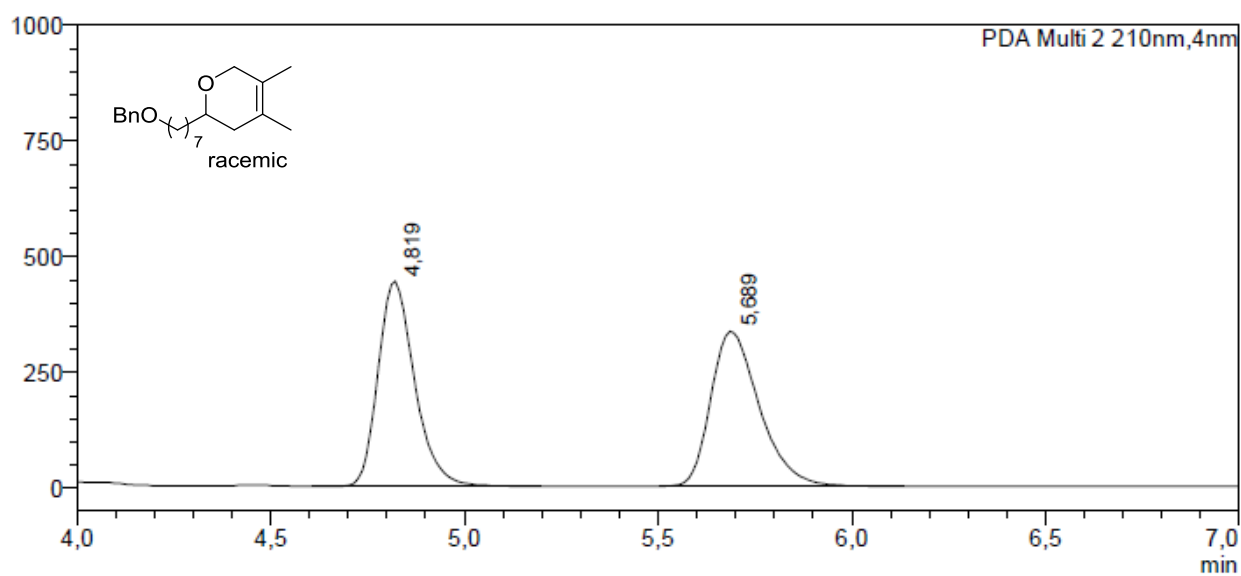

| Peak # | Ret. Time/min | Area/% |
|--------|---------------|--------|
| 1      | 4.82          | 49.88  |
| 2      | 5.69          | 50.12  |

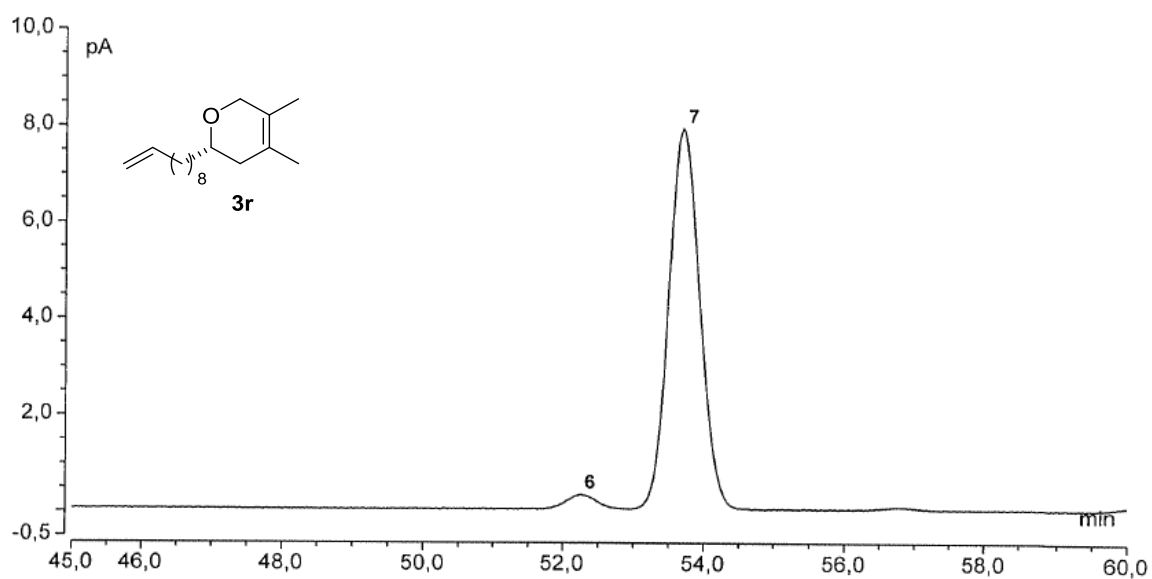

| Peak # | Ret. Time/min | Area/% |
|--------|---------------|--------|
| 6      | 52.26         | 3.45   |
| 7      | 53.72         | 96.55  |

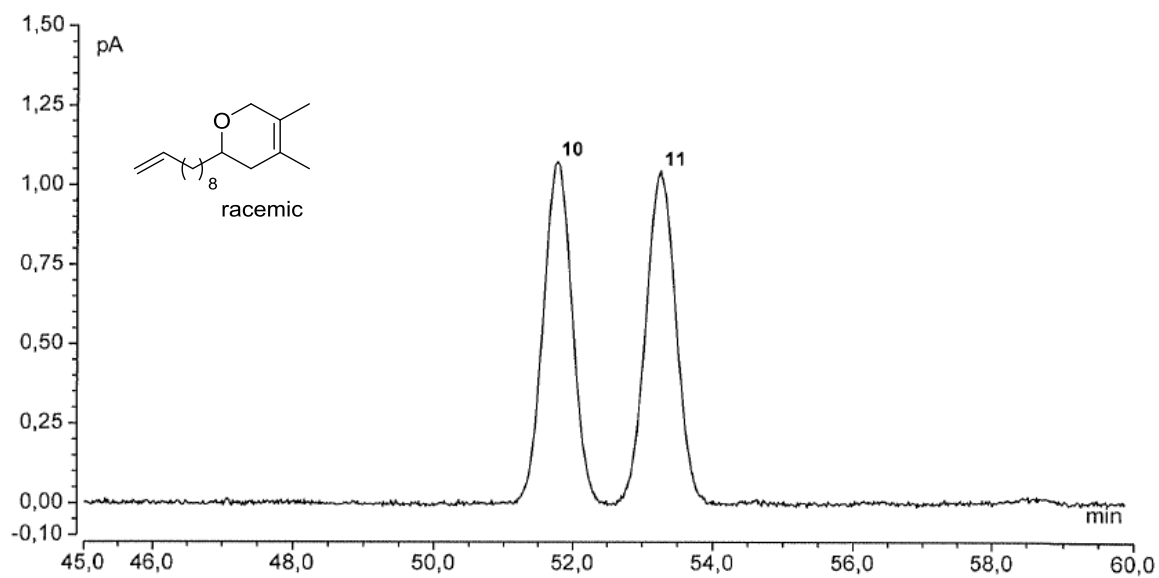

| Peak # | Ret. Time/min | Area/% |
|--------|---------------|--------|
| 10     | 51.78         | 50.08  |
| 11     | 53.26         | 49.92  |

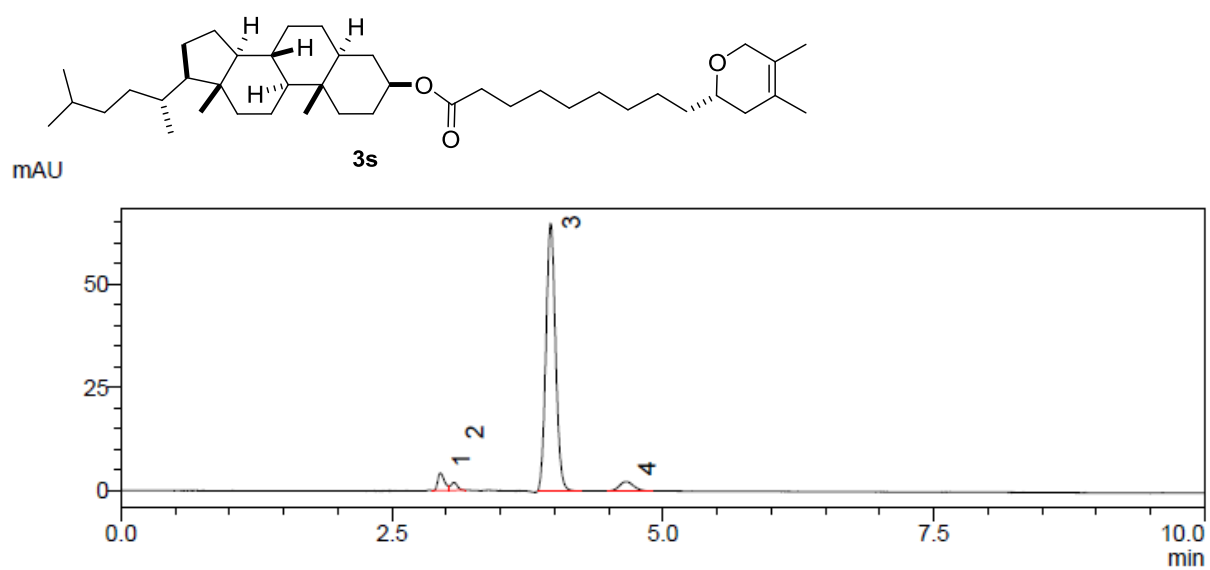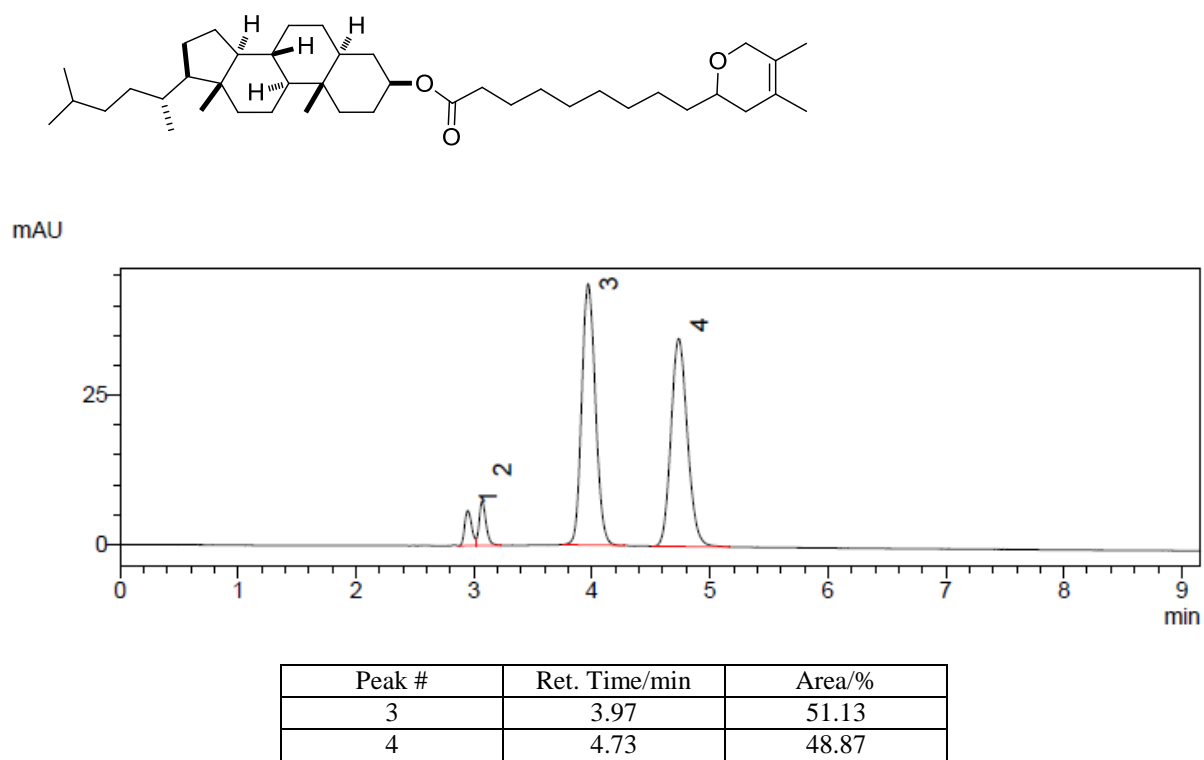



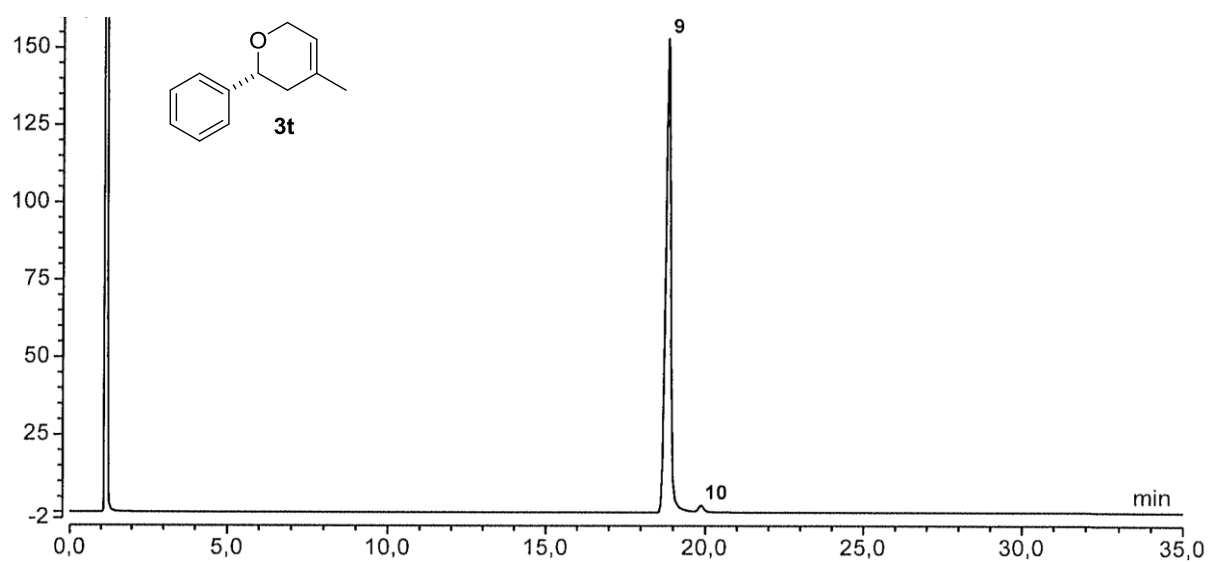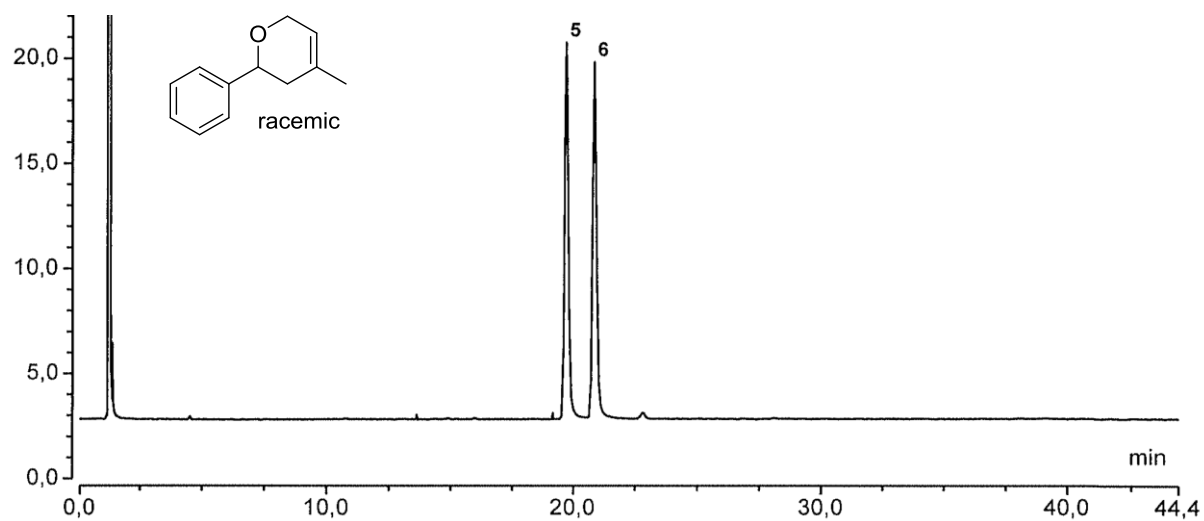

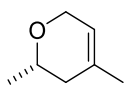

**3u**

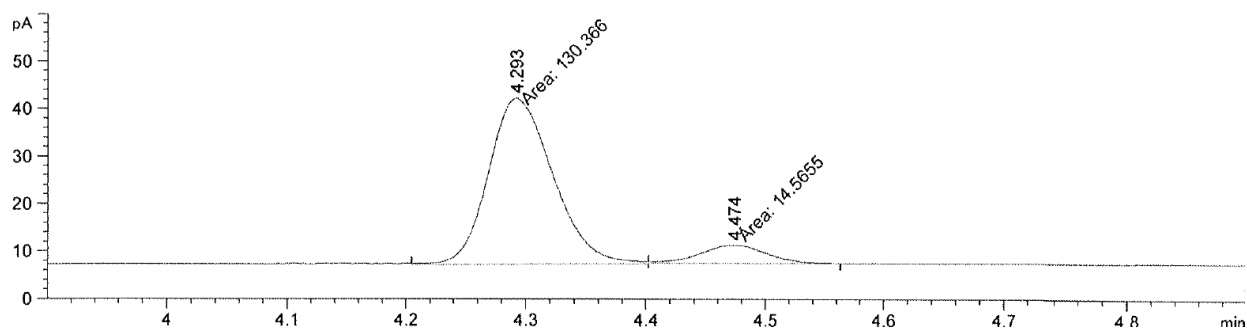

| Peak # | Ret. Time/min | Area/% |
|--------|---------------|--------|
| 1      | 4.29          | 89.95  |
| 2      | 4.47          | 10.05  |

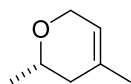

**racemic**

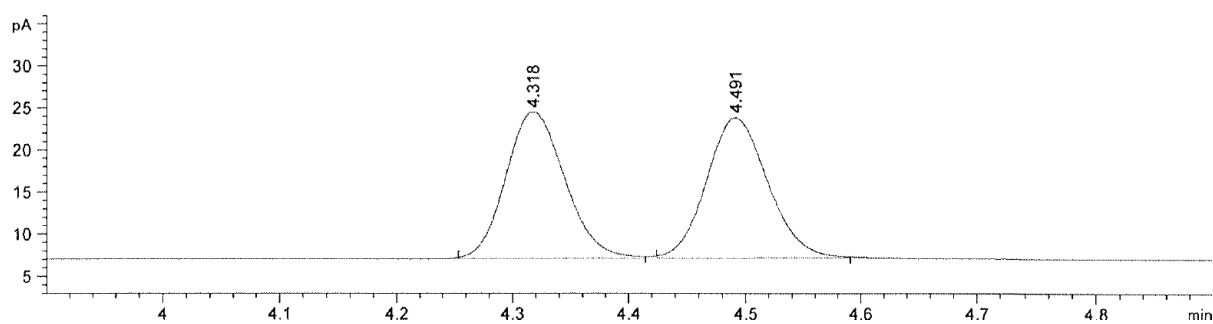

| Peak # | Ret. Time/min | Area/% |
|--------|---------------|--------|
| 1      | 4.32          | 50.01  |
| 2      | 4.49          | 49.99  |

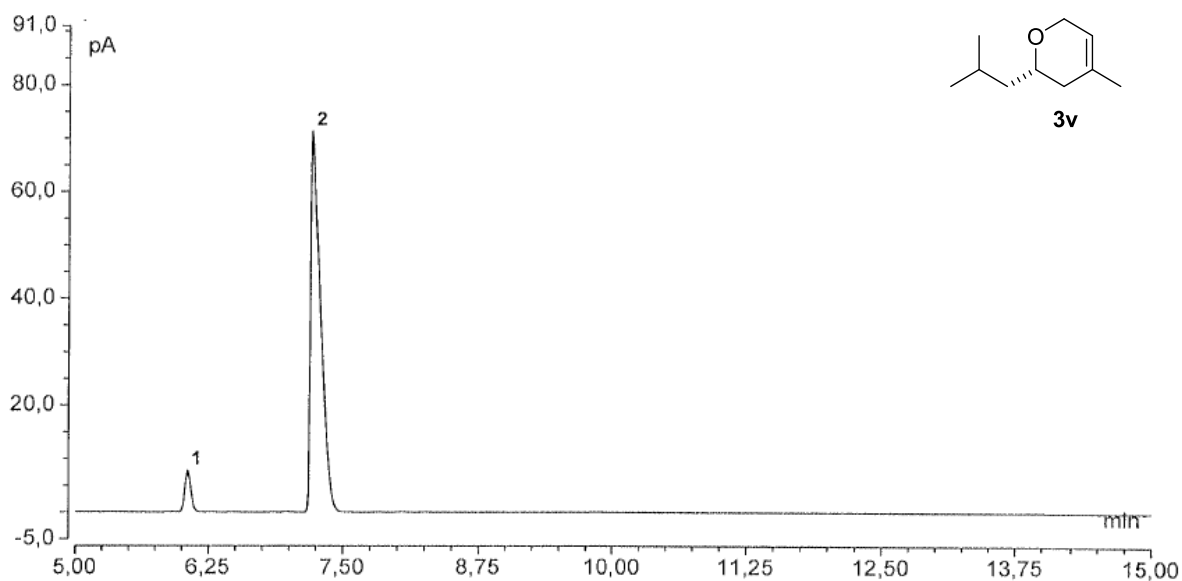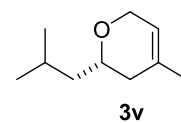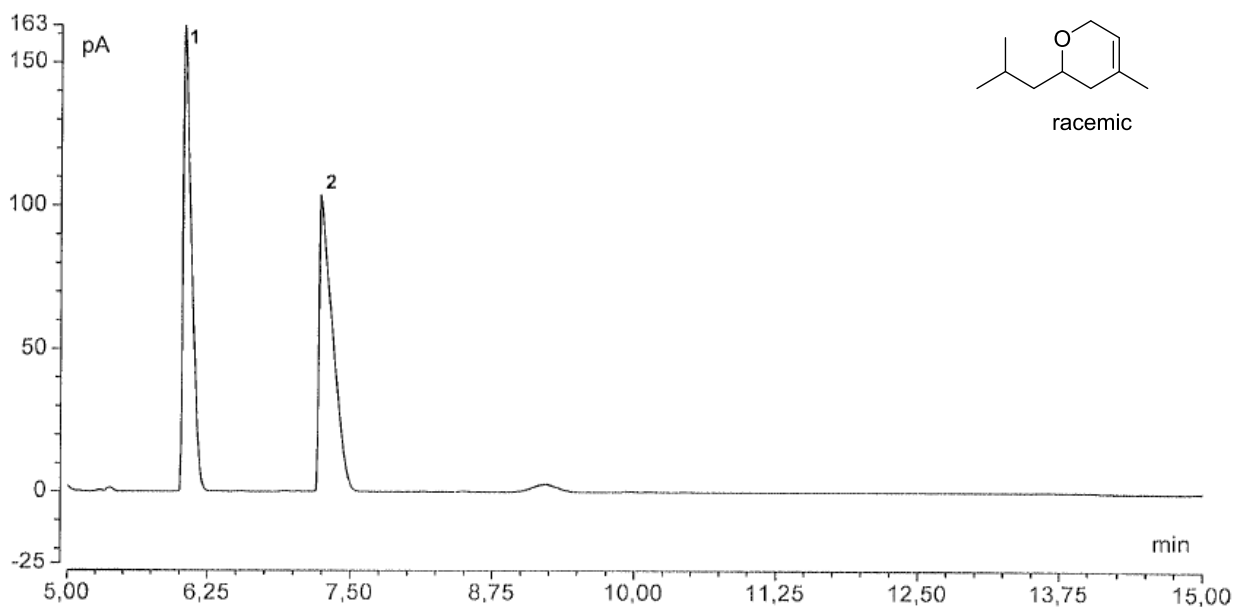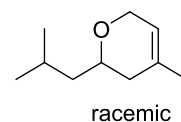

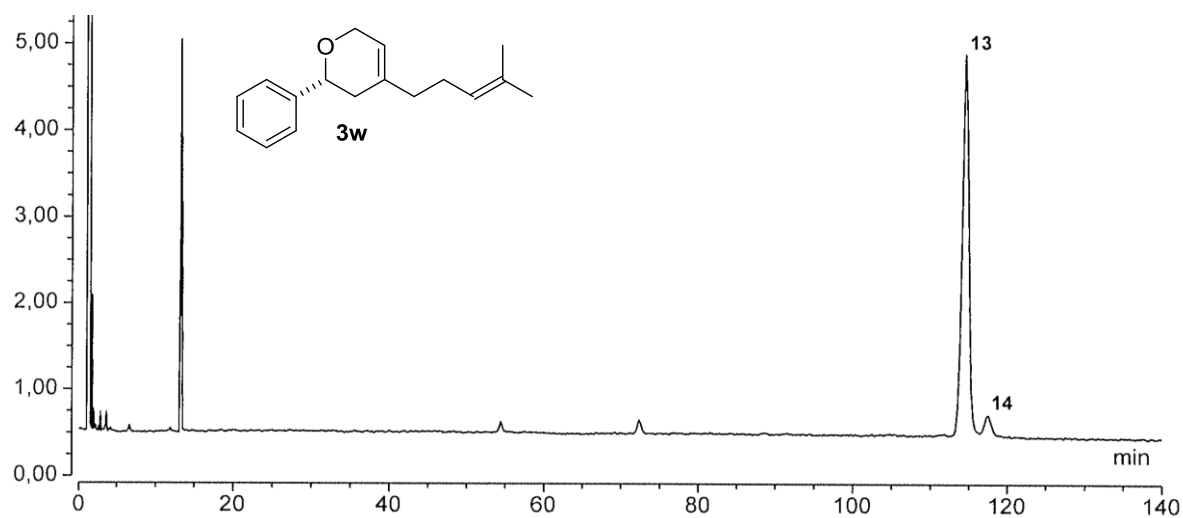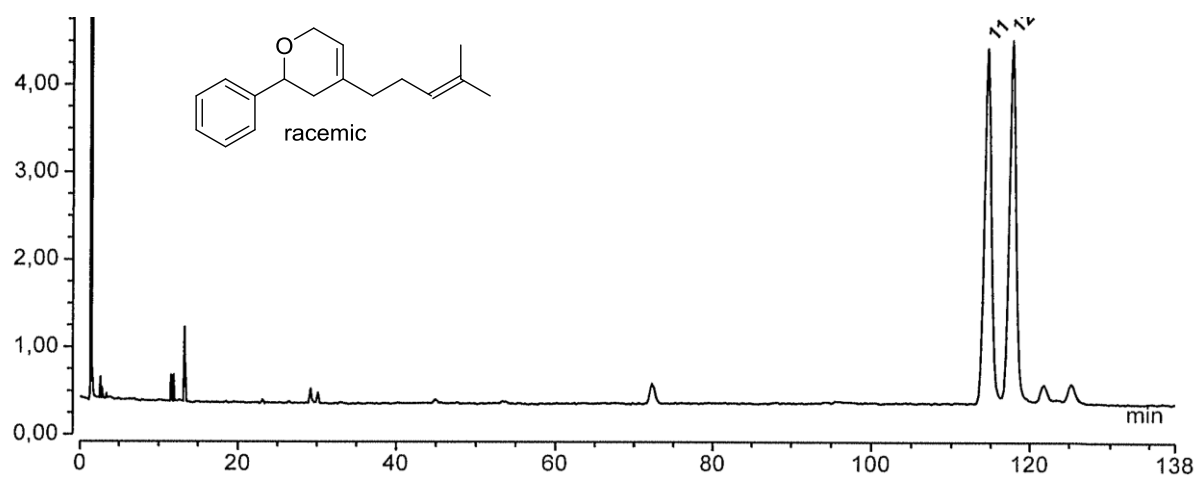

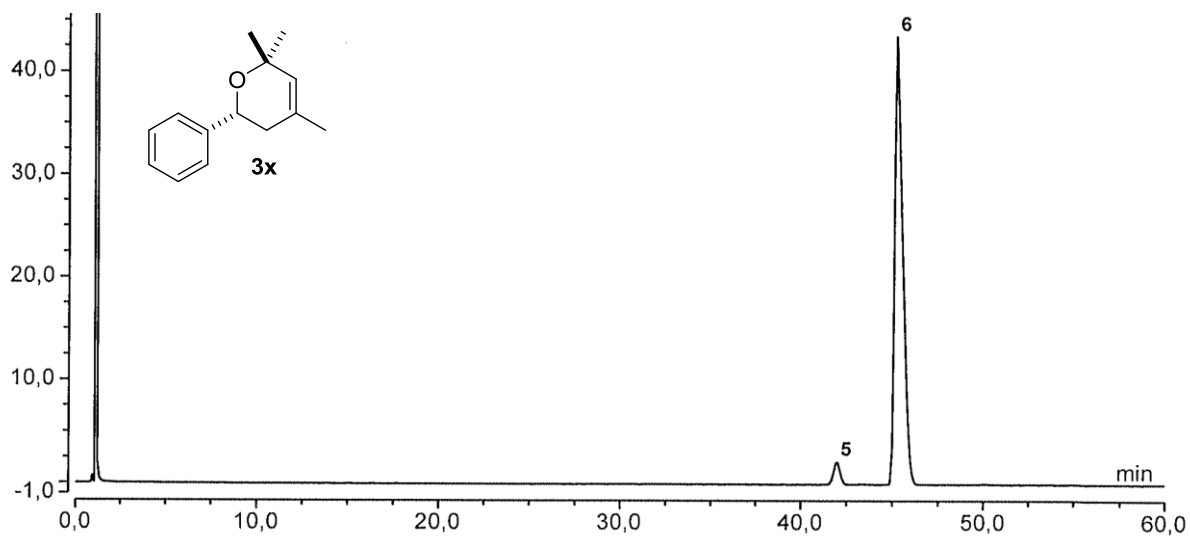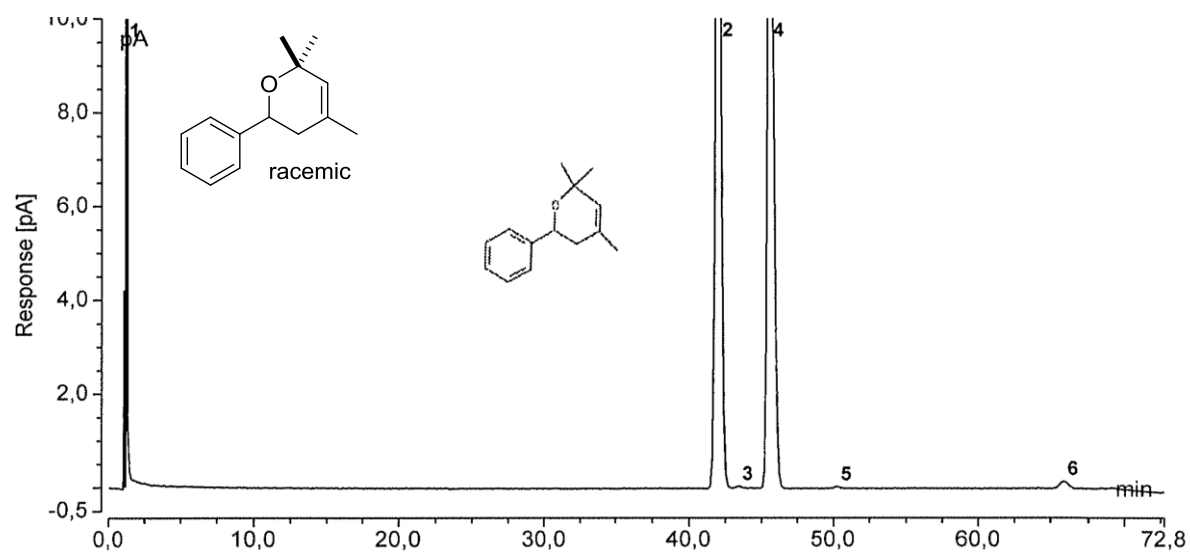

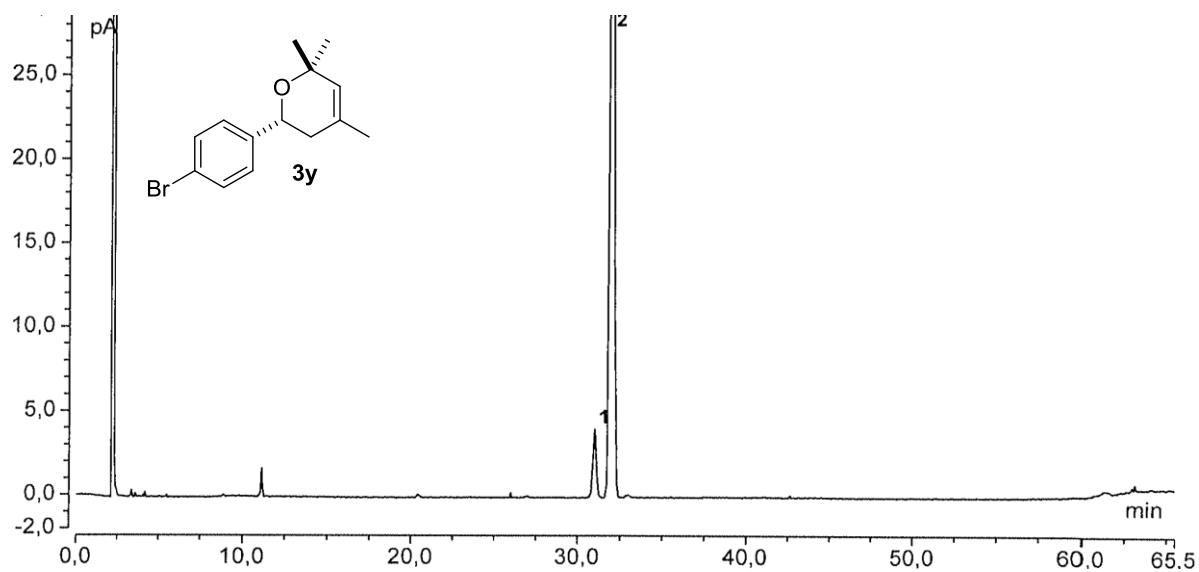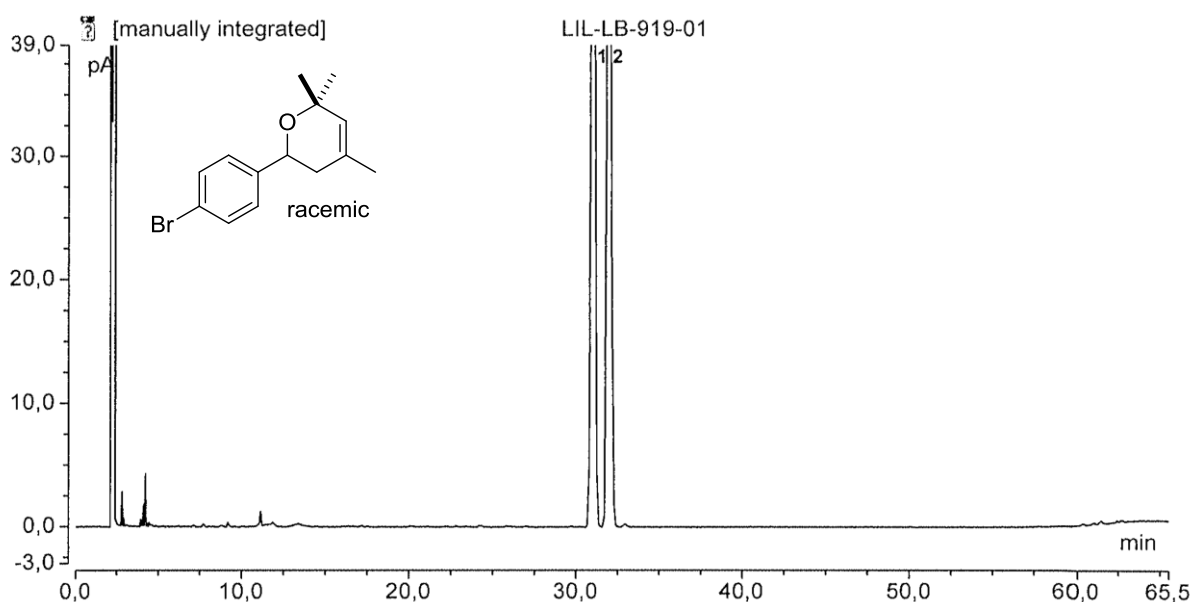

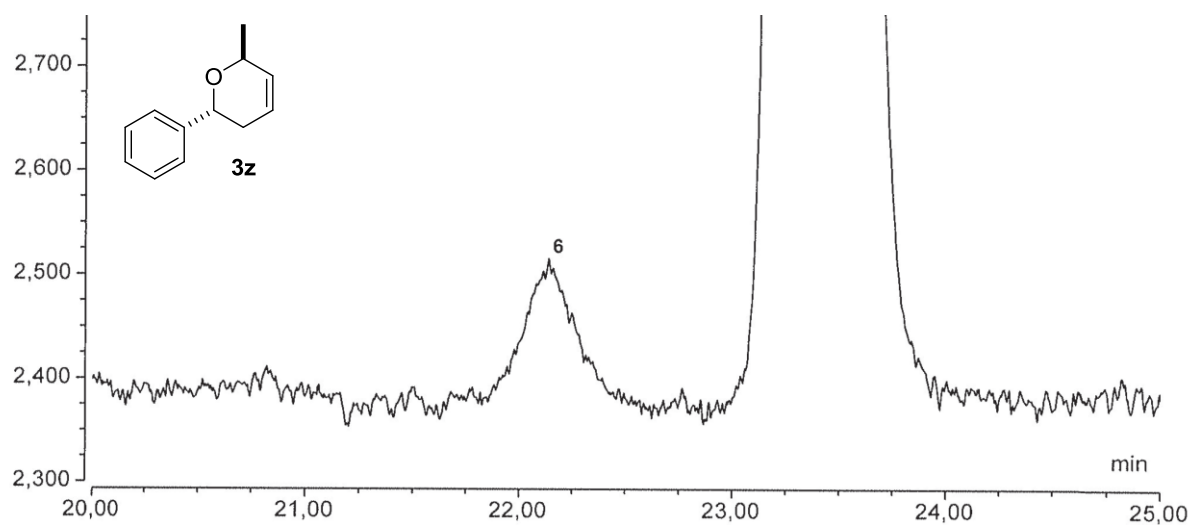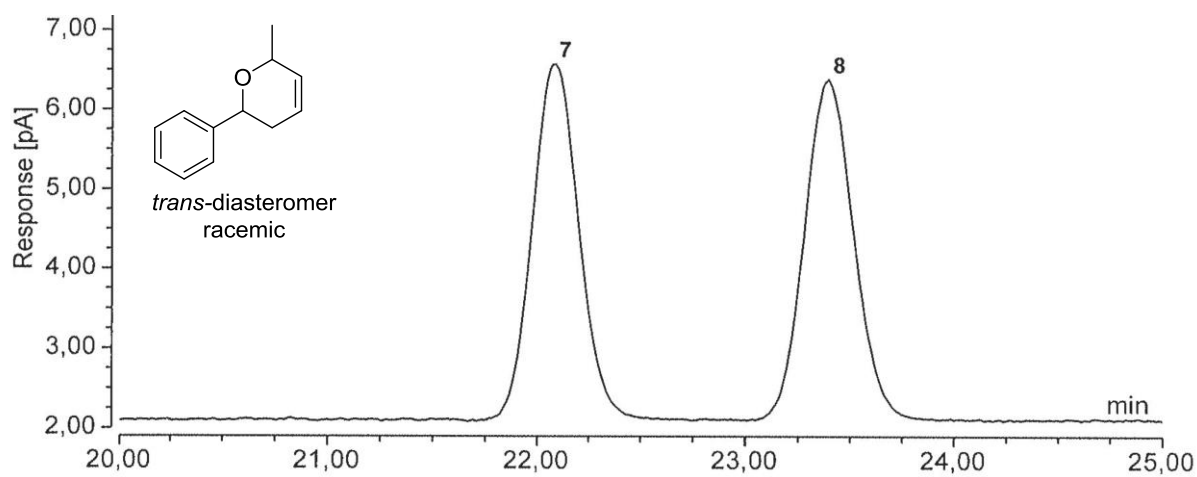

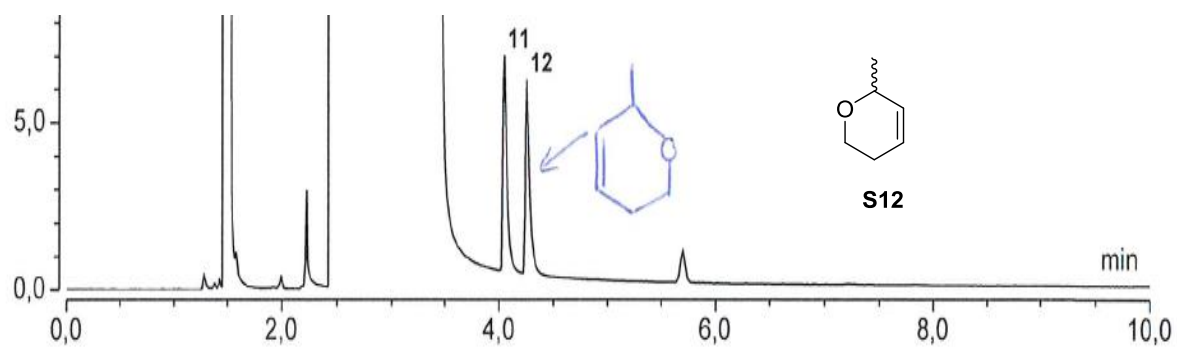

| Peak # | Ret. Time/min | Area/% |
|--------|---------------|--------|
| 11     | 4.05          | 50.29  |
| 12     | 4.25          | 49.71  |

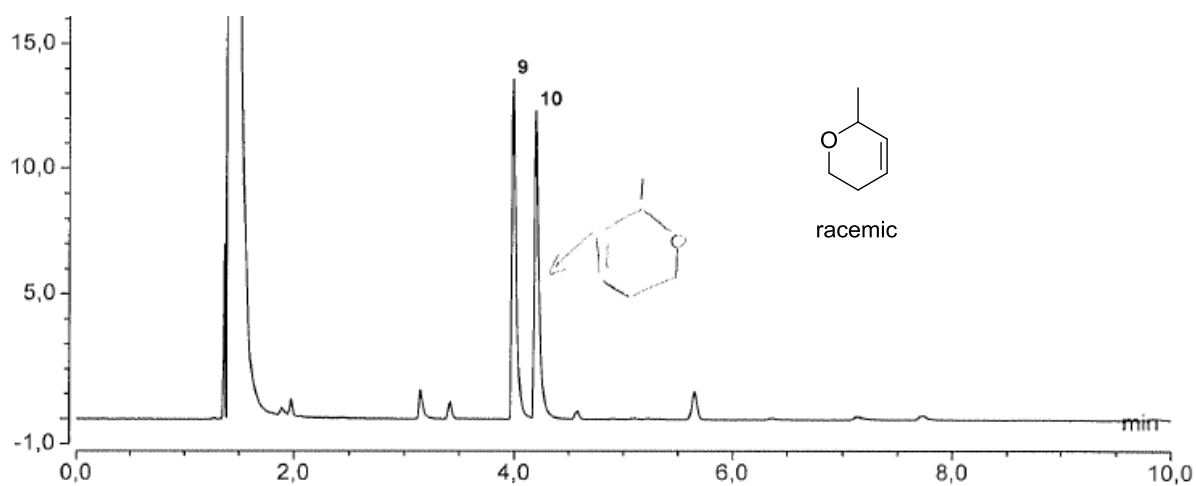

| Peak # | Ret. Time/min | Area/% |
|--------|---------------|--------|
| 9      | 3.99          | 49.64  |
| 10     | 4.19          | 50.36  |



mAU

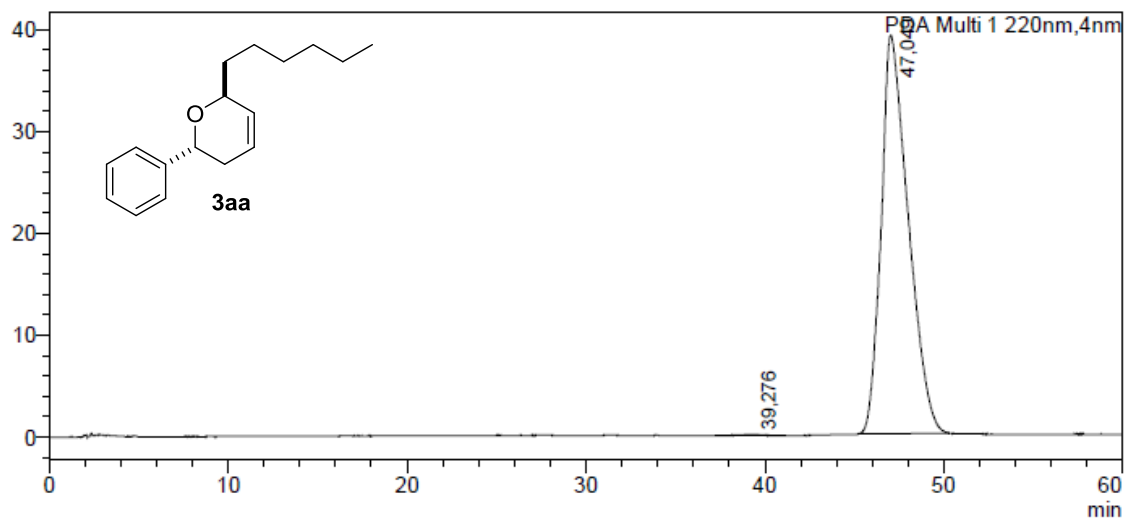

| Peak # | Ret. Time/min | Area/% |
|--------|---------------|--------|
| 1      | 39.28         | 0.21   |
| 2      | 47.05         | 99.79  |

mAU

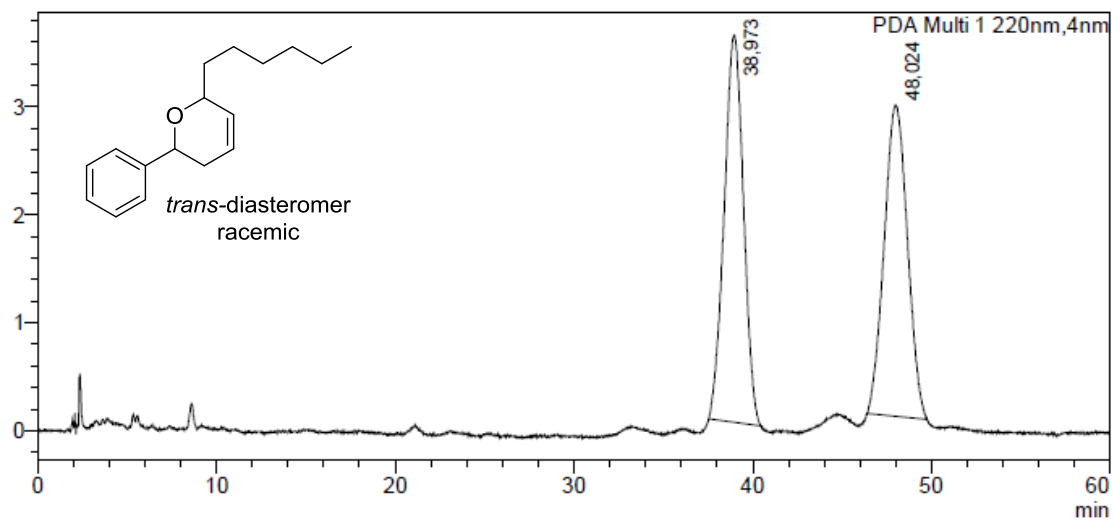

| Peak # | Ret. Time/min | Area/% |
|--------|---------------|--------|
| 1      | 38.97         | 50.78  |
| 2      | 48.02         | 49.22  |

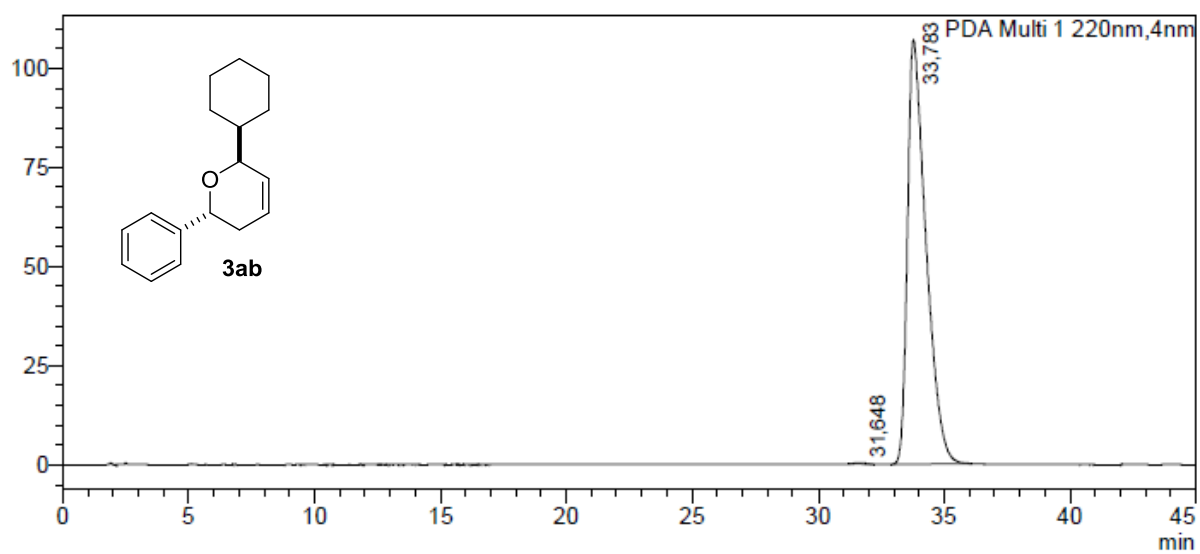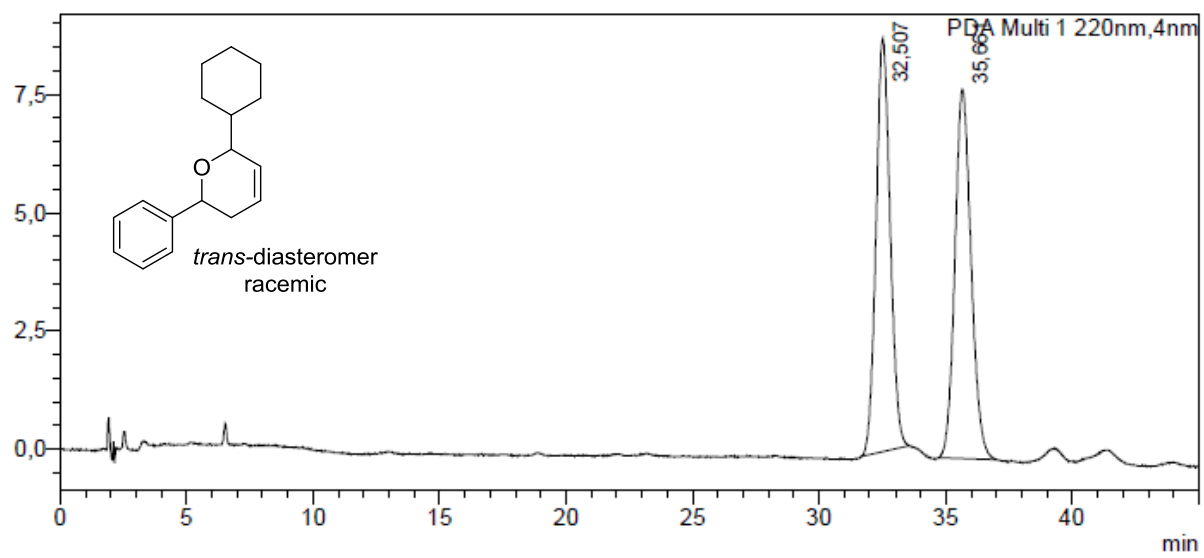

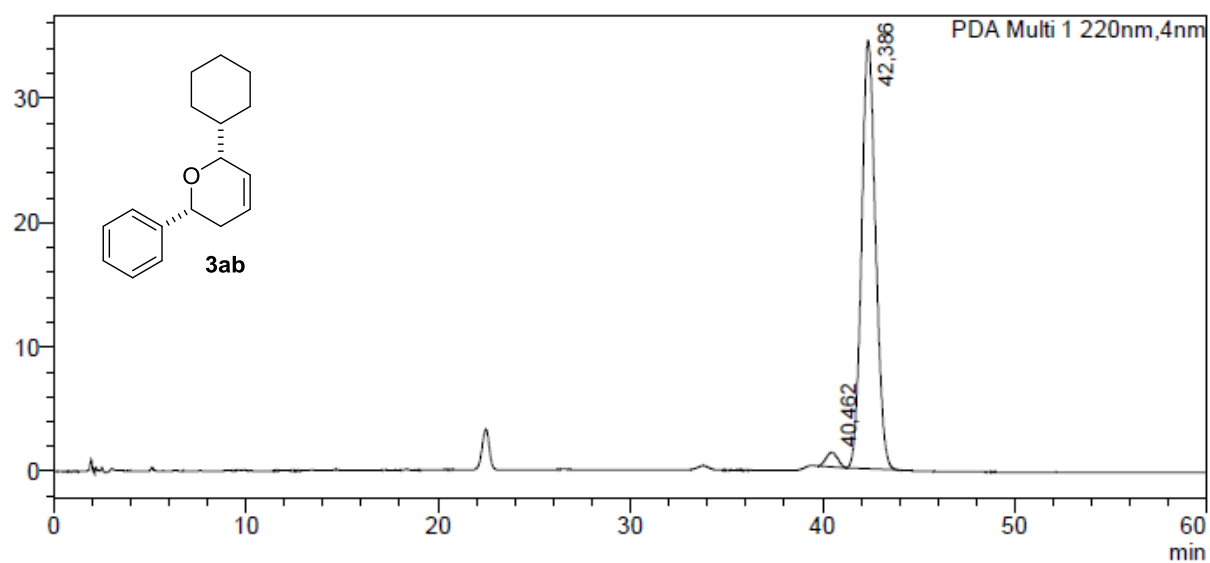

| Peak # | Ret. Time/min | Area/% |
|--------|---------------|--------|
| 1      | 40.46         | 2.72   |
| 2      | 42.39         | 97.28  |

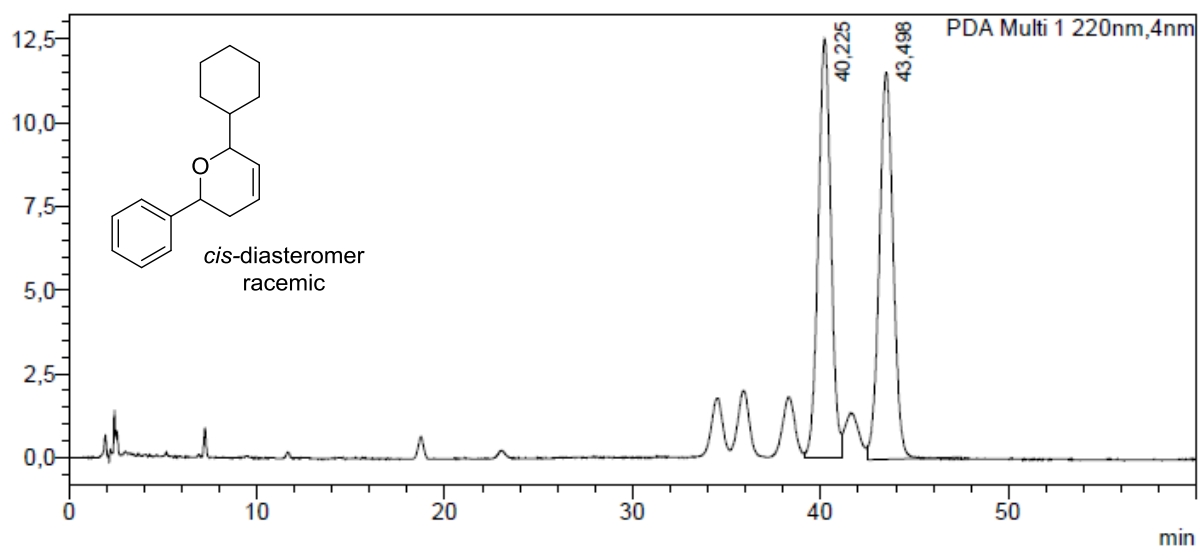

| Peak # | Ret. Time/min | Area/% |
|--------|---------------|--------|
| 1      | 40.23         | 49.95  |
| 2      | 43.50         | 50.05  |

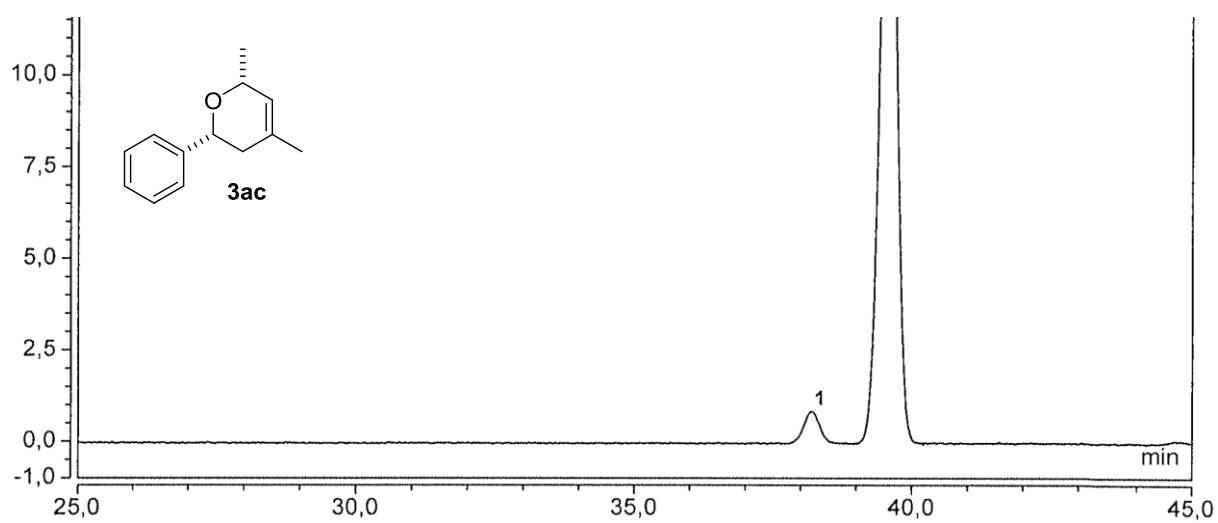

| Peak # | Ret. Time/min | Area/% |
|--------|---------------|--------|
| 1      | 38.19         | 3.95   |
| 2      | 39.59         | 96.05  |

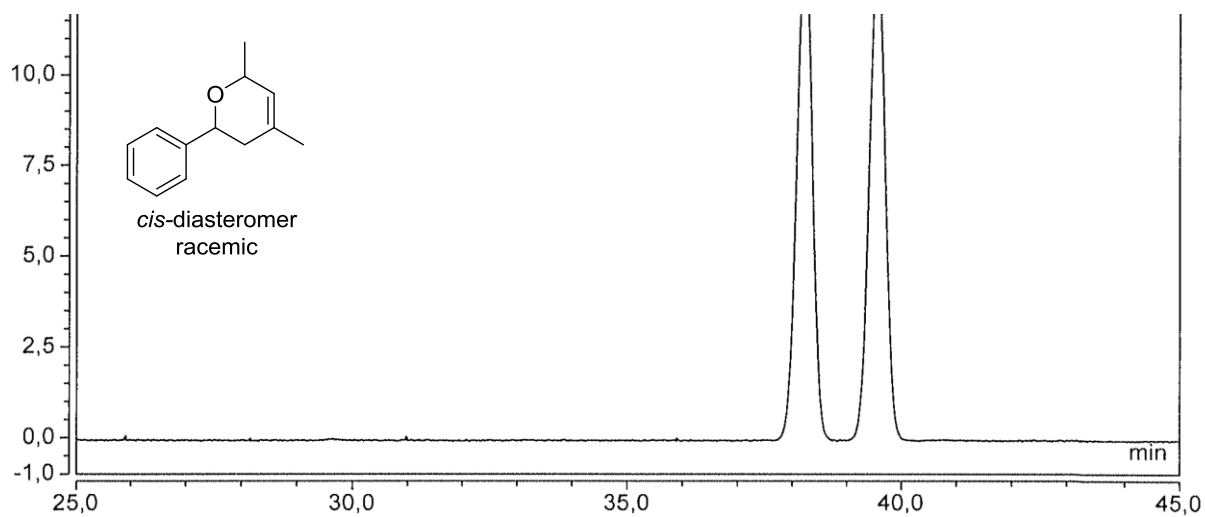

| Peak # | Ret. Time/min | Area/% |
|--------|---------------|--------|
| 1      | 38.24         | 49.93  |
| 2      | 39.57         | 50.07  |

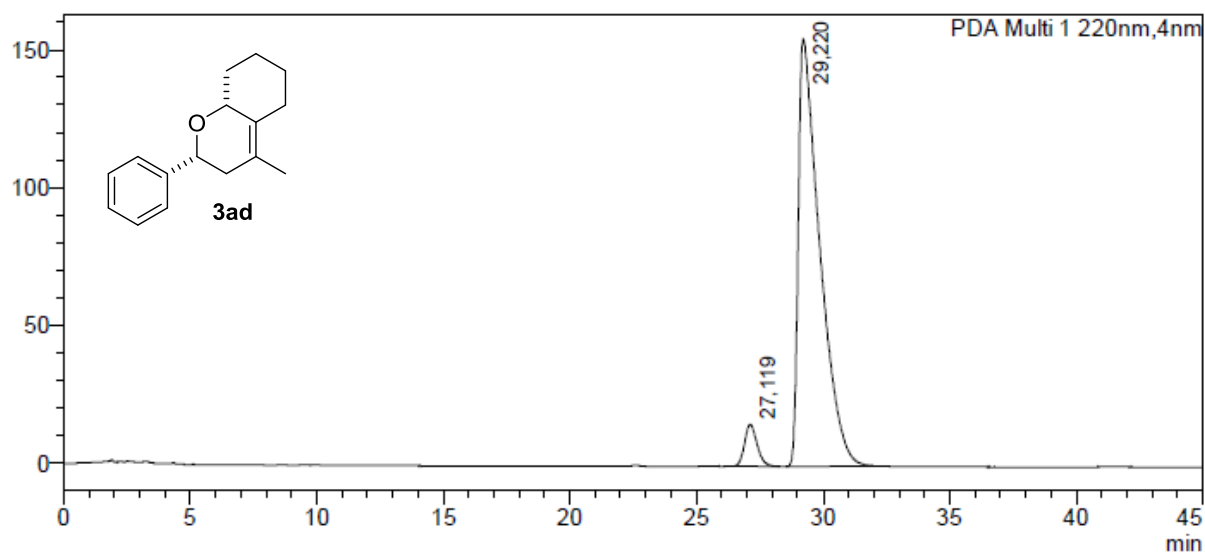

| Peak # | Ret. Time/min | Area/% |
|--------|---------------|--------|
| 1      | 27.12         | 5.40   |
| 2      | 29.22         | 94.60  |

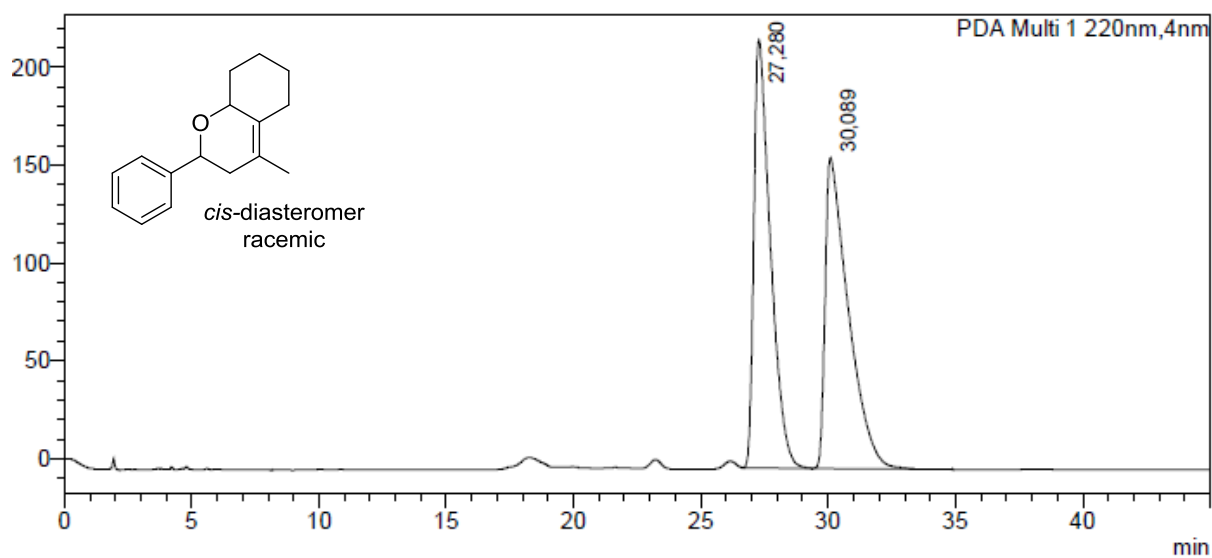

| Peak # | Ret. Time/min | Area/% |
|--------|---------------|--------|
| 1      | 27.28         | 49.68  |
| 2      | 30.09         | 50.32  |

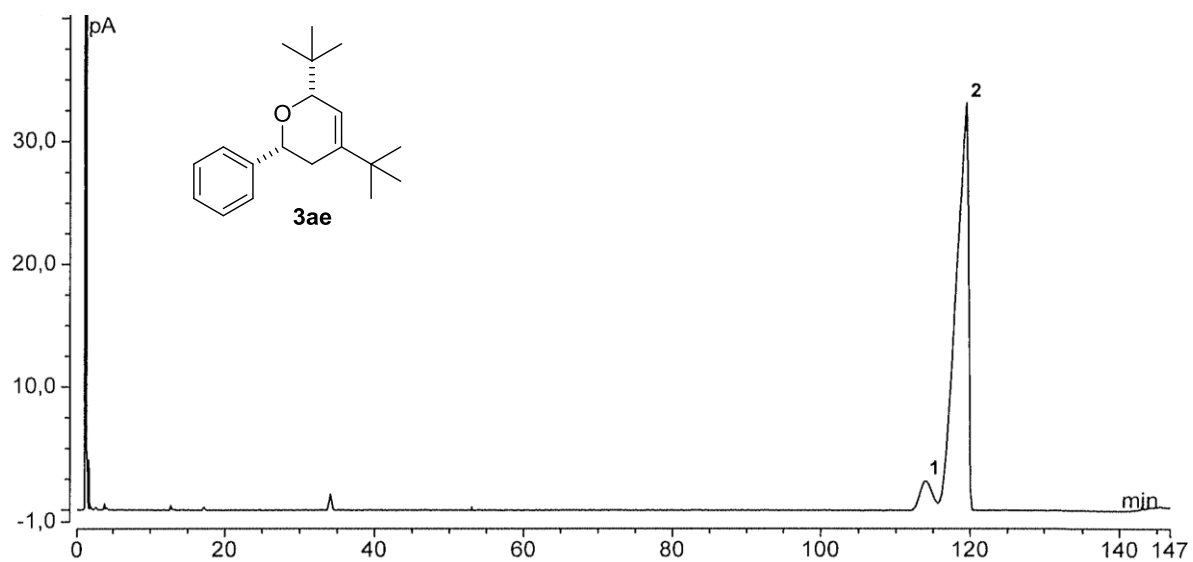

| Peak # | Ret. Time/min | Area/% |
|--------|---------------|--------|
| 1      | 113.99        | 5.33   |
| 2      | 119.57        | 94.67  |

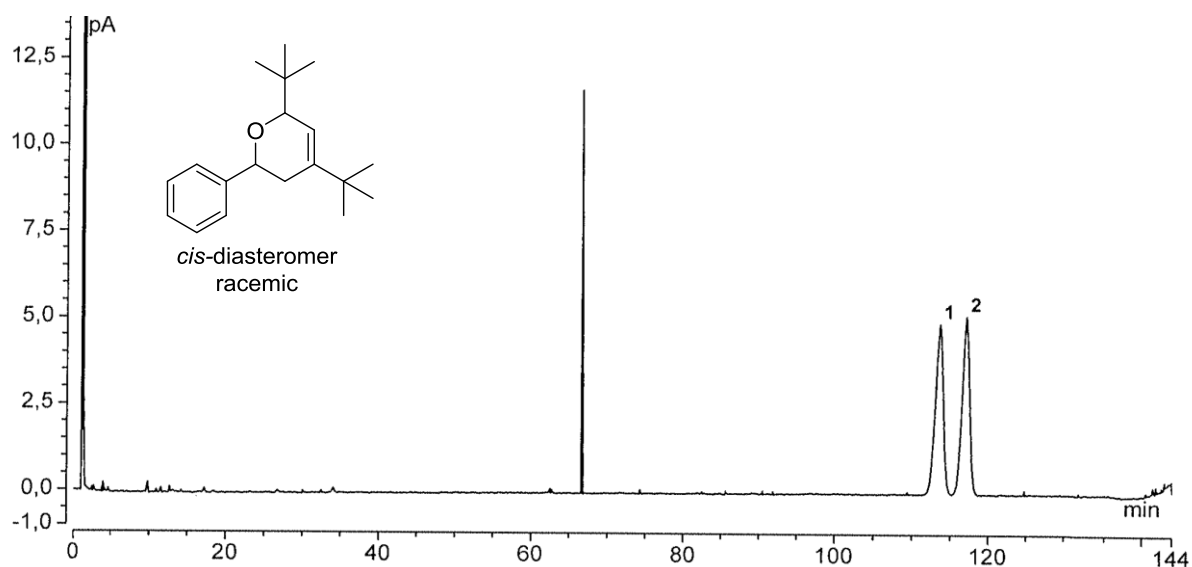

| Peak # | Ret. Time/min | Area/% |
|--------|---------------|--------|
| 1      | 113.62        | 50.06  |
| 2      | 117.09        | 49.94  |

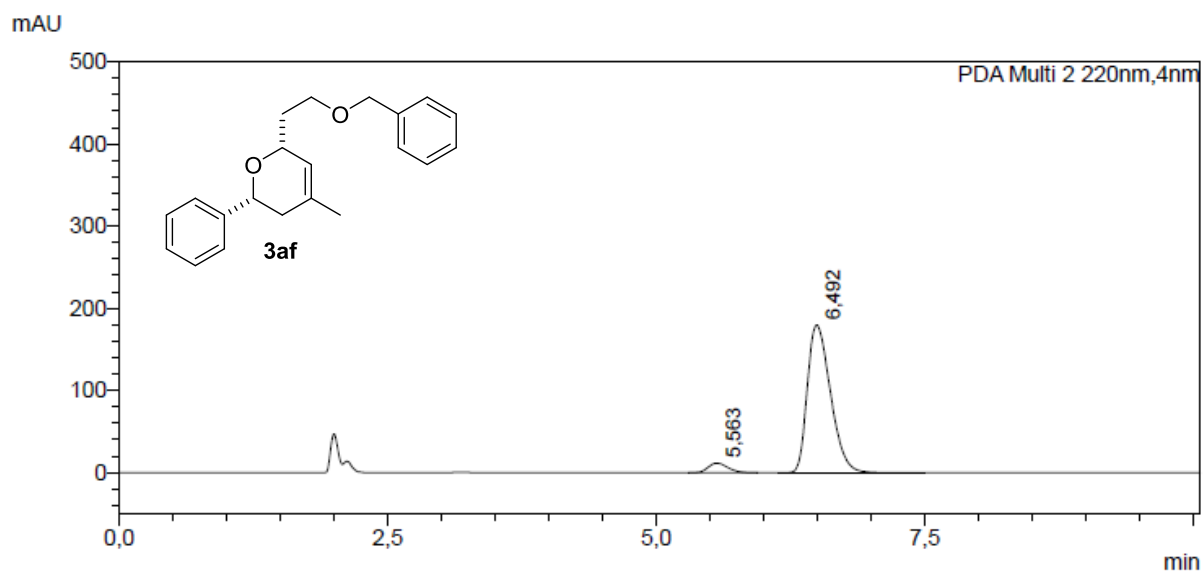

| Peak # | Ret. Time/min | Area/% |
|--------|---------------|--------|
| 1      | 5.56          | 5.15   |
| 2      | 6.49          | 94.85  |

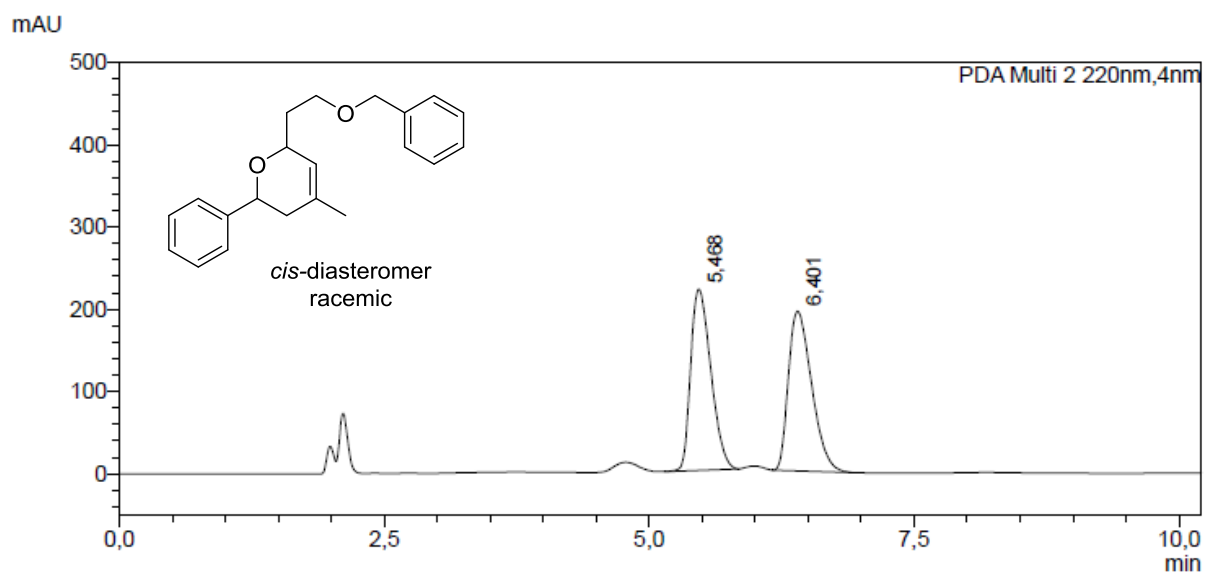

| Peak # | Ret. Time/min | Area/% |
|--------|---------------|--------|
| 1      | 5.47          | 49.61  |
| 2      | 6.40          | 50.39  |

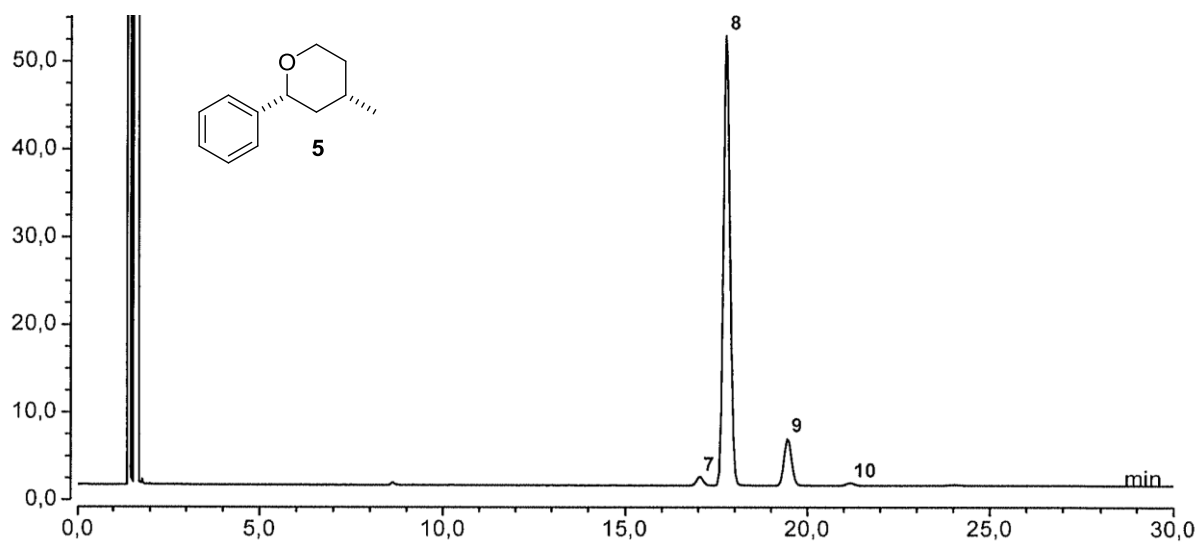

| Peak # | Ret. Time/min | Area/% |
|--------|---------------|--------|
| 7      | 17.04         | 1.66   |
| 8      | 17.76         | 87.56  |
| 9      | 19.45         | 10.18  |
| 10     | 21.17         | 0.59   |

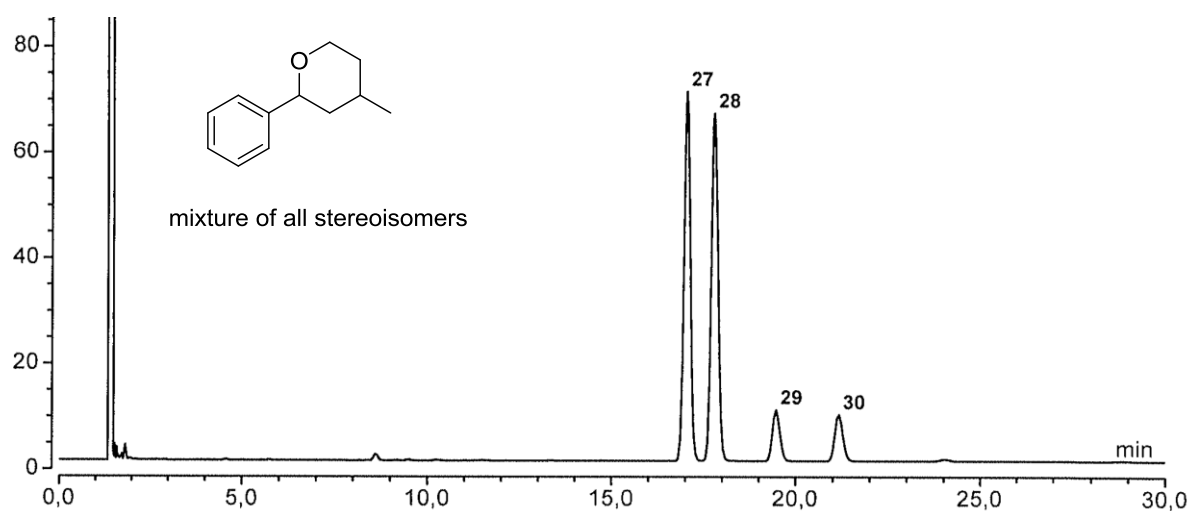

| Peak # | Ret. Time/min | Area/% |
|--------|---------------|--------|
| 27     | 17.04         | 43.05  |
| 28     | 17.79         | 43.13  |
| 29     | 19.47         | 6.92   |
| 30     | 21.17         | 6.90   |



## References

- (25). Yue, Y.; Turlington, M.; Yu, X. Q.; Pu, L. *J. Org. Chem.* **2009**, *74*, 8681.
- (26). Lee, J. W.; List, B. *J. Am. Chem. Soc.* **2012**, *134*, 18245.
- (27). Lützen, A.; Hapke, M.; Griep-Raming, J.; Haase, D.; Saak, W. *Angew. Chem. Int. Ed.* **2002**, *41*, 2086.
- (28). Kim, J. H.; Čorić, I.; Vellalath, S.; List, B. *Angew. Chem., Int. Ed.* **2013**, *52*, 4474.
- (29). Barman, S.; Anslyn, E. V. *Tetrahedron* **2014**, *70*, 1357.
- (30). Enders, D.; Bartzen, D. *Liebigs Ann. Chem.* **1991**, *1991*, 569.
- (31). Patel, H. H.; Sigman, M. S. *J. Am. Chem. Soc.* **2015**, *137*, 3462.
- (32). Quins, L. D.; Marsi, B. G. *Heteroat. Chem.* **1990**, *1*, 93.
- (33). Margot, C.; Rizzolio, M.; Schlosser, M. *Tetrahedron* **1990**, *46*, 2411.
- (34). Kobayashi, T.; Tsuruta, H. *Synthesis* **1980**, *6*, 492.
